# Supplementary material for: Follicular Fluid-Derived Extracellular Vesicles Influence on In Vitro Maturation of Equine Oocyte: Impact on Cumulus Cell Viability, Expansion and Transcriptome
Source: MDPI journal article supplement (doi:10.3390/ijms25063262), 2024-03-13
Supplement: s1 [file s1]

Table S1. Average change in COC dimensions.

| Group      | Culture no. | Mean H0 [um] | Mean H38 [um] | Expansion [%] | Mean Group H0 [um]  | Mean Group H38 [um]  | Mean Group Expansion [%] |
|------------|-------------|--------------|---------------|---------------|---------------------|----------------------|--------------------------|
| CP + ffEVs | 1           | 1133.9       | 1432.51       | 26.33         | 861.94 <sup>a</sup> | 1499.55 <sup>b</sup> | 78.83                    |
|            | 2           | 694.45       | 1704.15       | 145.4         |                     |                      |                          |
|            | 3           | 744.92       | 1340.26       | 79.92         |                     |                      |                          |
|            | 4           | 843.71       | 1594.74       | 89.02         |                     |                      |                          |
|            | 5           | 845.26       | 1269.255      | 50.16         |                     |                      |                          |
|            | 6           | 909.385      | 1656.37       | 82.14         |                     |                      |                          |
| CP control | 1           | 857.93       | 714.22        | -16.75        | 801.77              | 917.62               | 15.81                    |
|            | 2           | 705.2        | 990.66        | 40.48         |                     |                      |                          |
|            | 3           | 844.12       | 846.98        | 0.34          |                     |                      |                          |
|            | 4           | 828.52       | 1092.57       | 31.87         |                     |                      |                          |
|            | 5           | 823.81       | 758.41        | -7.94         |                     |                      |                          |
|            | 6           | 751.05       | 1102.86       | 46.84         |                     |                      |                          |
| EX + ffEVs | 1           | 627.98       | 779.65        | 24.15         | 741.34 <sup>a</sup> | 1044.87 <sup>b</sup> | 40.37                    |
|            | 2           | 733.02       | 812.58        | 10.85         |                     |                      |                          |
|            | 3           | 764.92       | 970.695       | 26.9          |                     |                      |                          |
|            | 4           | 777.43       | 1022.92       | 31.58         |                     |                      |                          |
|            | 5           | 726.92       | 1349.66       | 85.67         |                     |                      |                          |
|            | 6           | 817.79       | 1333.69       | 63.08         |                     |                      |                          |
| EX control | 1           | 579.23       | 484.01        | -16.44        | 719.67              | 819.1                | 11.56                    |
|            | 2           | 602.17       | 695.31        | 15.47         |                     |                      |                          |
|            | 3           | 741.72       | 925.03        | 24.71         |                     |                      |                          |
|            | 4           | 689.36       | 708.63        | 2.8           |                     |                      |                          |
|            | 5           | 734.95       | 796.27        | 8.34          |                     |                      |                          |
|            | 6           | 970.58       | 1305.35       | 34.49         |                     |                      |                          |

<sup>a,b</sup>—different letters in the index indicate statistically significant differences between columns
