# Supplementary material for: Follicular Fluid-Derived Extracellular Vesicles Influence on In Vitro Maturation of Equine Oocyte: Impact on Cumulus Cell Viability, Expansion and Transcriptome
Source: MDPI journal article supplement (doi:10.3390/ijms25063262), 2024-03-13
Supplement: s1 [file s1]

Table S6. Selected biological processes, molecular functions, and cellular components enriched in DE genes (adjP < 0.1) in CC of Ex COCs after 12 h treatment with ffEVs. GO – Gene Ontology term; P – adjusted *p*-value.

| GO                   | Description                                       | Term ID    | FDR   | Engaged Genes                                |
|----------------------|---------------------------------------------------|------------|-------|----------------------------------------------|
| Biological processes | female meiotic nuclear division                   | GO:0007143 | 0.024 | <i>TOP2A, TTK</i>                            |
|                      | regulation of mitotic cell cycle                  | GO:0007346 | 0.024 | <i>GPNMB, TTK, CENPF, CDKN1C</i>             |
|                      | meiotic chromosome separation                     | GO:0051307 | 0.024 | <i>TOP2A, TTK</i>                            |
|                      | negative regulation of mitotic cell cycle         | GO:0045930 | 0.024 | <i>GPNMB, TTK, CDKN1C</i>                    |
|                      | regulation of mitotic cell cycle phase transition | GO:1901990 | 0.034 | <i>GPNMB, TTK, CENPF</i>                     |
|                      | phosphorylation                                   | GO:0016310 | 0.034 | <i>GPNMB, FZD5, DAB2, ITPKA, TTK, CDKN1C</i> |
|                      | regulation of cell cycle phase transition         | GO:1901987 | 0.042 | <i>GPNMB, TTK, CENPF</i>                     |
|                      | cell cycle                                        | GO:0007049 | 0.042 | <i>GPNMB, TOP2A, TTK, CENPF, CDKN1C</i>      |
|                      | chromosome segregation                            | GO:0007059 | 0.042 | <i>TOP2A, TTK, CENPF</i>                     |
|                      | mitotic cell cycle                                | GO:0000278 | 0.042 | <i>GPNMB, TTK, CENPF, CDKN1C</i>             |
| Molecular functions  | protein c-terminus binding                        | GO:0008022 | 0.005 | <i>TOP2A, DAB2, CENPF</i>                    |
| Cellular components  | chromosome, centromeric region                    | GO:0000775 | 0.006 | <i>TOP2A, TTK, CENPF</i>                     |
|                      | condensed chromosome                              | GO:0000793 | 0.006 | <i>TOP2A, TTK, CENPF</i>                     |
|                      | chromosomal region                                | GO:0098687 | 0.007 | <i>TOP2A, TTK, CENPF</i>                     |
|                      | kinetochore                                       | GO:0000776 | 0.025 | <i>TTK, CENPF</i>                            |
|                      | condensed chromosome, centromeric region          | GO:0000779 | 0.025 | <i>TTK, CENPF</i>                            |
|                      | outer kinetochore                                 | GO:0000940 | 0.048 | <i>CENPF</i>                                 |
|                      | ciliary transition fiber                          | GO:0097539 | 0.048 | <i>CENPF</i>                                 |
