# Supplementary material for: Follicular Fluid-Derived Extracellular Vesicles Influence on In Vitro Maturation of Equine Oocyte: Impact on Cumulus Cell Viability, Expansion and Transcriptome
Source: MDPI journal article supplement (doi:10.3390/ijms25063262), 2024-03-13
Supplement: s1 [file s1]

Table S9. Target and housekeeping genes primers.

| Gene         | Relevance                                 | Strand | Sequence (5'-3')      | Product size [bp] | Reference (NCBI) |
|--------------|-------------------------------------------|--------|-----------------------|-------------------|------------------|
| <i>HAS2</i>  | hyaluronan synthase 2                     | F      | tcctggtgagacggatgagt  | 193               | NM_001081801.2   |
|              |                                           | R      | ggcaggggtcaagcatggtat |                   |                  |
| <i>DDIT4</i> | DNA damage-inducible transcript 4 protein | F      | cttcgtcgtcctcctcttcg  | 196               | XM_001502859.5   |
|              |                                           | R      | ccatccaggtatgccgagtc  |                   |                  |
| CENPF        | centromere protein F                      | F      | ggcctcgttcaagaagtgga  | 97                | XM_023640730.1   |
|              |                                           | R      | gctgctcttggctcttgagtc |                   |                  |
| <i>GAPDH</i> | glyceraldehyde-3-phosphate dehydrogenase  | F      | ggactcatgaccacagtgc   | 109               | NM_001163856.1   |
|              |                                           | R      | cagggatgatgttctgggca  |                   |                  |
| <i>YWHAZ</i> | tyrosine 3-monooxygenase                  | F      | ggcatccttggagggtcgtc  | 186               | XM_001492988.6   |
|              |                                           | R      | agaagactttgctctccgct  |                   |                  |
