# Supplementary material for: Follicular Fluid-Derived Extracellular Vesicles Influence on In Vitro Maturation of Equine Oocyte: Impact on Cumulus Cell Viability, Expansion and Transcriptome
Source: MDPI journal article supplement (doi:10.3390/ijms25063262), 2024-03-13
Supplement: s1 [file s1]

Table S8. Correlation coefficients between gene expression levels determined with qPCR and RNA-Seq methods.

| Gene         | Pearson |          | Spearman |          |
|--------------|---------|----------|----------|----------|
|              | r       | <i>p</i> | rho      | <i>p</i> |
| <i>CENPF</i> | −0.260  | 0.415    | −0.014   | 0.974    |
| <i>DDIT4</i> | 0.650   | 0.114    | 0.393    | 0.396    |
| <i>HAS2</i>  | 0.611   | 0.061    | 0.370    | 0.296    |
