# Supplementary material for: Follicular Fluid-Derived Extracellular Vesicles Influence on In Vitro Maturation of Equine Oocyte: Impact on Cumulus Cell Viability, Expansion and Transcriptome
Source: MDPI journal article supplement (doi:10.3390/ijms25063262), 2024-03-13
Supplement: s1 [file s1]

Table S4. Selected biological processes, molecular functions and cellular components enriched in DE genes (adjP < 0.1) in CC of Cp COCs after 12 h treatment with ffEVs. GO – Gene Ontology term; P – adjusted *p*-value.

| GO                   | Description                                                             | Term ID    | FDR                   | Engaged genes                                                           |
|----------------------|-------------------------------------------------------------------------|------------|-----------------------|-------------------------------------------------------------------------|
| Biological processes | cell cycle                                                              | GO:0007049 | 0.004                 | <i>GPNMB, PARD6B, NUSAP1, SEPTIN9, ASPM, JUN, CENPF, KIFC1, GADD45A</i> |
|                      | organelle localization                                                  | GO:0051640 | 0.004                 | <i>VMP1, KIF5C, NUSAP1, ASPM, CENPF, KIFC1</i>                          |
|                      | microtubule-based process                                               | GO:0007017 | 0.009                 | <i>PARD6B, CEP57, KIF5C, NUSAP1, GAS8, ASPM, KIFC1</i>                  |
|                      | microtubule cytoskeleton organization                                   | GO:0000226 | 0.010                 | <i>PARD6B, CEP57, NUSAP1, GAS8, ASPM, KIFC1</i>                         |
|                      | cell cycle process                                                      | GO:0022402 | 0.015                 | <i>GPNMB, PARD6B, NUSAP1, SEPTIN9, ASPM, CENPF, KIFC1</i>               |
|                      | response to muscle stretch                                              | GO:0035994 | 0.018                 | <i>FOS, JUN</i>                                                         |
|                      | chromosome segregation                                                  | GO:0007059 | 0.030                 | <i>CIAO2A, NUSAP1, CENPF, KIFC1</i>                                     |
|                      | response to mechanical stimulus                                         | GO:0009612 | 0.030                 | <i>FOS, JUN, GADD45A</i>                                                |
|                      | negative regulation of phosphorylation                                  | GO:0042326 | 0.030                 | <i>DDIT4, DUSP1, JUN, GADD45A</i>                                       |
|                      | negative regulation of nucleobase-containing compound metabolic process | GO:0045934 | 0.030                 | <i>DDIT4, HMGB2, JUN, CENPF, MAF, FOXL2, GADD45A</i>                    |
| Molecular functions  | microtubule binding                                                     | GO:0008017 | $6.21 \times 10^{-5}$ | <i>CEP57, KIF5C, NUSAP1, GAS8, CENPF, KIFC1</i>                         |
|                      | tubulin binding                                                         | GO:0015631 | $1.70 \times 10^{-4}$ | <i>CEP57, KIF5C, NUSAP1, GAS8, CENPF, KIFC1</i>                         |
|                      | r-smad binding                                                          | GO:0070412 | 0.015                 | <i>FOS, JUN</i>                                                         |
|                      | cytoskeletal protein binding                                            | GO:0008092 | 0.015                 | <i>CEP57, KIF5C, NUSAP1, GAS8, CENPF, KIFC1</i>                         |
|                      | transcription factor binding                                            | GO:0008134 | 0.041                 | <i>HMGB2, FOS, JUN, CENPF</i>                                           |
| Cellular components  | microtubule                                                             | GO:0005874 | $6.3 \times 10^{-6}$  | <i>CEP57, KIF5C, NUSAP1, GAS8, SEPTIN9, ASPM, KIFC1</i>                 |
|                      | polymeric cytoskeletal fiber                                            | GO:0099513 | $1.1 \times 10^{-4}$  | <i>CEP57, KIF5C, NUSAP1, GAS8, SEPTIN9, ASPM, KIFC1</i>                 |
|                      | transcription factor ap-1 complex                                       | GO:0035976 | $2.3 \times 10^{-4}$  | <i>FOS, JUN</i>                                                         |
|                      | supramolecular complex                                                  | GO:0099080 | $2.3 \times 10^{-4}$  | <i>CEP57, KIF5C, NUSAP1, GAS8, SEPTIN9, ASPM, CENPF, KIFC1</i>          |
|                      | supramolecular polymer                                                  | GO:0099081 | $2.3 \times 10^{-4}$  | <i>CEP57, KIF5C, NUSAP1, GAS8, SEPTIN9, ASPM, KIFC1</i>                 |
|                      | supramolecular fiber                                                    | GO:0099512 | $2.3 \times 10^{-4}$  | <i>CEP57, KIF5C, NUSAP1, GAS8, SEPTIN9, ASPM, KIFC1</i>                 |
|                      | microtubule cytoskeleton                                                | GO:0015630 | $6.2 \times 10^{-4}$  | <i>CEP57, KIF5C, NUSAP1, GAS8, SEPTIN9, ASPM, CENPF, KIFC1</i>          |
|                      | spindle                                                                 | GO:0005819 | 0.007                 | <i>NUSAP1, ASPM, CENPF, KIFC1</i>                                       |
|                      | mitotic spindle                                                         | GO:0072686 | 0.008                 | <i>NUSAP1, ASPM, KIFC1</i>                                              |
|                      | plasma membrane bounded cell projection cytoplasm                       | GO:0032838 | 0.010                 | <i>KIF5C, GAS8, SEPTIN9</i>                                             |
