# Supplementary material for: Follicular Fluid-Derived Extracellular Vesicles Influence on In Vitro Maturation of Equine Oocyte: Impact on Cumulus Cell Viability, Expansion and Transcriptome
Source: Int J Mol Sci. 2024 Mar 13;25(6):3262. doi: 10.3390/ijms25063262 (PMC10970002; doi:10.3390/ijms25063262)
Supplement: Supplementary file 1 [file ijms-25-03262-s001.zip]

Archive with 9 entries (9 files):
- Table S1.pdf
- Table S2.xlsx
- Table S3.xlsx
- Table S4.pdf
- Table S5.xlsx
- Table S6.pdf
- Table S7.xlsx
- Table S8.pdf
- Table S9.pdf
