# Supplementary material for: Follicular Fluid-Derived Extracellular Vesicles Influence on In Vitro Maturation of Equine Oocyte: Impact on Cumulus Cell Viability, Expansion and Transcriptome
Source: Int J Mol Sci. 2024 Mar 13;25(6):3262. doi: 10.3390/ijms25063262 (PMC10970002; doi:10.3390/ijms25063262)
Supplement: Supplementary file 1 [file ijms-25-03262-s001.zip › Table S2.xlsx]

## Sheet: Arkusz1
	flexbar	STAR			HTSeq-count
Category	Reads after trimming	Uniquely mapped reads	Percent of uniquely mapped reads	Mapped to multiple loci	Assigned		Percent of reads mapped to multiple loci
EX R	11021539	6789124	61.5987	592470	4868738		5.37557
EX R	6685190	4263006	63.7679	315248	2585243		4.71562
EX R	6693189	4101597	61.2802	313422	2598289		4.6827
CP C	6920488	4145683	59.9045	287759	2383628		4.15807
CP C	7355033	4234845	57.5775	339497	2539370		4.61585
CP R	6463642	3941888	60.9856	317138	2220532		4.90649
CP R	7046773	4164091	59.0922	334626	2384265		4.74864
EX C	6478080	4252305	65.6414	334937	2807746		5.17031
EX C	6411807	4240769	66.14	308433	2526745		4.81039
CP R	10065571	6508230	64.6583	616829	4501553		6.12811
EX R	6579092	4403987	66.9391	323516	2647514		4.91734
CP R	12055420	7400669	61.3887	699358	5156564		5.80119
EX R	6860990	4121272	60.0682	298162	2780430		4.34576
CP R	11071470	6772485	61.1706	606355	4665571		5.47673
CP C	6793450	4648742	68.4298	357724	2471889		5.26572
EX C	11903381	7623376	64.0438	638026	5398717		5.36004
CP C	6456230	4420531	68.4692	329487	2549846		5.1034
CP C	6539978	4612361	70.5256	355341	2489242		5.43337
EX C	10615089	6816138	64.2118	580310	4911413		5.46684
EX C	6465107	3993130	61.7643	313784	2494812		4.8535
min	6411807	3941888	57.5775	287759	2220532		4.15807
max	12055420	7623376	70.5256	699358	5398717		6.12811
mediana	6827220	4.3335e+06	62.7661	334782	2591766		5.01037
mean	8.02408e+06	5.07271e+06	63.3829	413121	3.24911e+06		5.06678
EX R - cumulus cells in expanded COCs, research group (+ EVs)
CP R - cumulus cells in compacted COCs, research group (+ EVs)
EX C - cumulus cells in expanded COCs, control group (without EVs)
CP C - cumulus cells in compacted COCs, control group (without EVs)
