# Supplementary material for: Follicular Fluid-Derived Extracellular Vesicles Influence on In Vitro Maturation of Equine Oocyte: Impact on Cumulus Cell Viability, Expansion and Transcriptome
Source: Int J Mol Sci. 2024 Mar 13;25(6):3262. doi: 10.3390/ijms25063262 (PMC10970002; doi:10.3390/ijms25063262)
Supplement: Supplementary file 1 [file ijms-25-03262-s001.zip › Table S3.xlsx]

## Sheet: CP C vs. CP R
	gene	baseMean	log2FoldChange	lfcSE	stat	pvalue	padj	aj12.txt	aj13.txt	aj5.txt	aj6.txt	aj7.txt	zj14.txt	zj15.txt	zj3_j3.txt	zj3_j4.txt	zj3_j5.txt	gen	type
1	ENSECAG00000013822	126.049	-1.82667	0.321549	-5.68087	1.34013e-08	9.43721e-05	66.4778	54.7842	56.9341	40.85	57.3627	368.273	135.326	200.409	176.685	103.383	KIF5C	protein_coding
2	ENSECAG00000024531	241.382	-1.85264	0.325329	-5.69467	1.23612e-08	9.43721e-05	50.1499	111.9	118.613	108.933	132.651	502.314	624.777	355.543	177.243	231.7	ADM	protein_coding
3	ENSECAG00000009958	263.326	-1.24247	0.221499	-5.60939	2.03036e-08	9.53187e-05	144.618	226.131	151.824	158.861	100.385	316.823	475.538	300.946	382.911	375.22	DUSP1	protein_coding
4	ENSECAG00000020042	12.5619	5.2077	1.05525	4.93504	8.01346e-07	0.00282154	12.829	2.33124	36.7699	11.3472	58.5577	1.35395	1.26473	0	0.557367	0.608135	GAS8	protein_coding
5	ENSECAG00000014260	142.972	-1.43215	0.303476	-4.71915	2.36827e-06	0.00636336	92.1359	69.9373	118.613	59.0056	47.8022	109.67	212.475	260.332	287.044	172.71	FOS	protein_coding
6	ENSECAG00000016495	419.031	-1.36047	0.28998	-4.69159	2.71089e-06	0.00636336	113.129	208.646	300.09	243.965	307.129	727.069	989.019	531.982	373.993	395.288	NUSAP1	protein_coding
7	ENSECAG00000004107	858.367	-1.32112	0.284675	-4.6408	3.47066e-06	0.00698296	382.539	670.233	472.079	296.163	630.99	1084.51	2395.4	933.466	877.853	840.443	DDIT4	protein_coding
8	ENSECAG00000024055	967.774	-1.06773	0.236911	-4.50688	6.5789e-06	0.0115822	365.045	764.648	1022.44	543.532	430.22	1494.76	1078.81	1382.89	1423.52	1171.88	JUN	protein_coding
9	ENSECAG00000003112	6.34527	5.77611	1.30065	4.44094	8.95685e-06	0.0126148	6.99766	9.32498	2.37225	13.6167	29.8764	0	1.26473	0	0	0	0	protein_coding
10	ENSECAG00000048140	5.07122	6.05822	1.35889	4.4582	8.26502e-06	0.0126148	12.829	3.49687	11.8613	3.40417	19.1209	0	0	0	0	0	0	lncRNA
11	ENSECAG00000010132	717.436	-1.19162	0.271692	-4.38592	1.15497e-05	0.0145599	370.876	317.049	394.98	490.2	609.479	1401.33	1386.14	1078.61	467.073	658.611	HMGB2	protein_coding
12	ENSECAG00000049390	7.21654	6.56859	1.50299	4.37034	1.24055e-05	0.0145599	1.16628	0	11.8613	34.0417	25.0962	0	0	0	0	0	0	protein_coding
13	ENSECAG00000033482	31.9761	-2.62299	0.604949	-4.33589	1.45173e-05	0.0157278	2.33255	17.4843	7.11676	11.3472	5.97528	62.2815	130.267	19.3085	22.2947	41.3532	MAF	protein_coding
14	ENSECAG00000034891	508.909	-0.889891	0.208823	-4.26147	2.03088e-05	0.0190686	358.047	336.865	333.302	287.085	466.072	774.457	920.723	512.674	637.07	462.791	FOXL2	protein_coding
15	ENSECAG00000046492	7.14649	5.31626	1.24477	4.27086	1.94719e-05	0.0190686	6.99766	4.66249	26.0948	20.425	10.7555	0	2.52946	0	0	0	0	lncRNA
16	ENSECAG00000040631	294.025	-1.38945	0.332391	-4.18018	2.91274e-05	0.0256394	159.78	177.175	292.973	47.6584	135.041	521.269	249.152	550.625	405.206	401.369	GADD45A	protein_coding
17	ENSECAG00000009294	85.0428	-1.37246	0.331284	-4.14284	3.43027e-05	0.0284188	68.8103	64.1092	20.1642	30.6375	52.5825	170.597	121.414	122.509	98.6539	100.95	PARD6B	protein_coding
18	ENSECAG00000057832	4.23336	5.79808	1.43035	4.05361	5.04325e-05	0.0394606	9.33021	13.9875	5.93064	1.13472	11.9506	0	0	0	0	0	0	lncRNA
19	ENSECAG00000019564	4.79982	5.97985	1.49347	4.00399	6.22821e-05	0.043859	8.16394	0	17.7919	12.482	9.56045	0	0	0	0	0	0	protein_coding
20	ENSECAG00000024127	588.745	-1.20947	0.301511	-4.01137	6.03676e-05	0.043859	156.281	318.215	291.787	503.817	505.509	1188.76	1143.32	749.702	475.434	554.62	CENPF	protein_coding
21	ENSECAG00000049668	5.40523	6.15095	1.55388	3.95844	7.54396e-05	0.0505949	1.16628	0	14.2335	14.7514	23.9011	0	0	0	0	0	0	lncRNA
22	ENSECAG00000019267	5.51601	5.56764	1.4109	3.94615	7.94185e-05	0.0508423	1.16628	1.16562	18.978	18.1556	14.3407	1.35395	0	0	0	0	0	protein_coding
23	ENSECAG00000004339	90.4159	-1.44315	0.36672	-3.93527	8.31022e-05	0.0508875	39.6534	22.1468	90.1457	55.6014	34.6566	165.181	203.622	86.5553	108.687	97.9098	MIS18BP1	protein_coding
24	ENSECAG00000058688	48.6388	1.80898	0.462116	3.91455	9.05716e-05	0.0531504	50.1499	132.881	66.4231	49.9278	81.2638	6.76973	10.1178	40.6144	31.2125	17.0278	0	lncRNA
25	ENSECAG00000048591	6.27025	-5.84793	1.49876	-3.90184	9.5464e-05	0.0537806	0	0	0	0	0	23.0171	25.2946	4.66067	0	9.73017	0	lncRNA
26	ENSECAG00000010938	304.747	-0.805517	0.208586	-3.86179	0.000112559	0.0566171	156.281	250.609	222.992	246.235	230.646	442.74	512.216	319.589	277.569	388.599	CEP57	protein_coding
27	ENSECAG00000020246	230.166	0.740021	0.191413	3.86609	0.000110592	0.0566171	292.735	277.418	219.433	259.852	390.783	184.137	150.503	167.118	170.554	189.13	SEPTIN9	protein_coding
28	ENSECAG00000034339	506.611	-1.121	0.289891	-3.86698	0.000110191	0.0566171	417.527	493.058	257.39	159.996	266.498	746.024	1006.73	840.252	421.927	456.71	0	protein_coding
29	ENSECAG00000020645	171	-1.31423	0.343016	-3.83141	0.000127413	0.0618789	47.8173	80.4279	96.0763	147.514	117.115	326.301	405.978	189.09	188.39	111.289	ASPM	protein_coding
30	ENSECAG00000005570	1569.8	0.634005	0.169497	3.7405	0.000183653	0.0821379	1267.74	1677.33	2519.33	1980.09	2103.3	1165.75	1155.96	1334.95	1246.83	1246.68	VMP1	protein_coding
31	ENSECAG00000006404	4.41951	5.86137	1.57499	3.72152	0.000198024	0.0821379	0	4.66249	17.7919	18.1556	3.58517	0	0	0	0	0	SLC17A3	protein_coding
32	ENSECAG00000010064	4.15156	5.76917	1.55005	3.72194	0.000197701	0.0821379	1.16628	3.49687	17.7919	1.13472	17.9258	0	0	0	0	0	OLFM3	protein_coding
33	ENSECAG00000024196	97.2446	-1.22762	0.329901	-3.72119	0.000198288	0.0821379	36.1546	68.7717	34.3977	69.2181	81.2638	147.58	225.122	111.856	108.687	89.3959	KIFC1	protein_coding
34	ENSECAG00000047902	6.03019	5.04697	1.35092	3.73596	0.000187001	0.0821379	4.66511	5.82811	1.18613	11.3472	34.6566	1.35395	1.26473	0	0	0	0	lncRNA
35	ENSECAG00000000658	6.17685	-5.85274	1.58113	-3.70163	0.000214222	0.0862027	0	0	0	0	0	10.8316	0	0.66581	8.91787	41.3532	GPNMB	protein_coding
36	ENSECAG00000010303	14.0018	3.92221	1.0709	3.66255	0.000249718	0.0976951	30.3232	74.5998	2.37225	20.425	2.39011	6.76973	2.52946	0	0	0.608135	CIAO2A	protein_coding
37	ENSECAG00000013815	538.845	-0.86322	0.236794	-3.64545	0.000266925	0.101605	195.934	314.718	580.016	403.961	415.88	911.206	648.806	628.525	585.793	703.613	RSRC2	protein_coding
38	ENSECAG00000035868	3.94864	5.69906	1.57023	3.62945	0.000284026	0.105269	12.829	0	5.93064	14.7514	5.97528	0	0	0	0	0	0	lncRNA
39	ENSECAG00000019015	26.2406	-1.98139	0.550904	-3.59662	0.000322384	0.113512	17.4941	4.66249	10.6751	7.94306	11.9506	63.6355	48.0597	55.928	32.3273	9.73017	GRM8	protein_coding
40	ENSECAG00000037269	3.98887	5.71262	1.58757	3.59835	0.000320237	0.113512	3.49883	0	7.11676	11.3472	17.9258	0	0	0	0	0	0	protein_coding
41	ENSECAG00000010859	66.3655	-1.52722	0.428793	-3.56168	0.00036849	0.115329	20.993	13.9875	41.5144	35.1764	58.5577	132.687	159.356	38.617	69.1135	93.6529	KIF4A	protein_coding
42	ENSECAG00000011380	105.808	-1.07285	0.299998	-3.5762	0.000348621	0.115329	46.6511	40.7968	90.1457	73.757	88.4341	162.474	209.945	98.5399	128.752	118.586	TACC3	protein_coding
43	ENSECAG00000014813	117.566	-1.27147	0.356885	-3.5627	0.000367061	0.115329	33.822	31.4718	80.6566	110.068	87.2391	236.941	225.122	106.53	134.883	128.925	CCNB2	protein_coding
44	ENSECAG00000017269	150.51	-0.970331	0.27094	-3.58135	0.000341828	0.115329	95.6347	131.715	97.2624	76.0264	106.36	285.683	220.063	235.697	126.522	130.141	TNFRSF21	protein_coding
45	ENSECAG00000035279	2730.25	-0.85028	0.238324	-3.56774	0.00036007	0.115329	973.841	1997.88	2936.85	1876.83	1953.92	3617.74	5200.57	2997.48	2931.75	2815.67	IGFBP2	protein_coding
46	ENSECAG00000006038	103.397	-1.04107	0.296049	-3.51654	0.000437203	0.13386	54.815	61.778	47.4451	79.4306	93.2144	182.783	188.445	103.201	137.112	85.7471	SGO2	protein_coding
47	ENSECAG00000039188	5.45625	4.89079	1.39654	3.50209	0.000461627	0.138331	2.33255	1.16562	33.2116	5.67361	9.56045	1.35395	1.26473	0	0	0	0	protein_coding
48	ENSECAG00000002437	112.662	-1.05741	0.302953	-3.49033	0.000482426	0.138663	33.822	58.2811	83.0289	71.4875	118.311	171.951	189.71	153.802	107.572	138.655	NFIL3	protein_coding
49	ENSECAG00000048507	3.64866	5.58365	1.59926	3.49141	0.000480482	0.138663	0	4.66249	10.6751	6.80834	14.3407	0	0	0	0	0	0	lncRNA
50	ENSECAG00000031280	4.96089	5.41252	1.55402	3.48292	0.000495974	0.139706	16.3279	0	1.18613	4.53889	26.2912	0	1.26473	0	0	0	0	protein_coding
51	ENSECAG00000051864	3.63754	5.57959	1.61371	3.45762	0.000544966	0.150496	4.66511	0	17.7919	7.94306	5.97528	0	0	0	0	0	0	lncRNA
52	ENSECAG00000046128	3.62316	4.9431	1.43233	3.45109	0.000558326	0.15122	1.16628	6.99373	5.93064	13.6167	7.17034	1.35395	0	0	0	0	0	lncRNA
53	ENSECAG00000027106	4.75031	5.34774	1.5636	3.42016	0.00062585	0.166311	1.16628	1.16562	1.18613	5.67361	37.0467	0	1.26473	0	0	0	SNORD116	snoRNA
54	ENSECAG00000023013	3.53891	5.53937	1.62694	3.40479	0.000662159	0.172701	0	6.99373	5.93064	4.53889	17.9258	0	0	0	0	0	NDST4	protein_coding
55	ENSECAG00000034468	6.77454	4.44004	1.30831	3.39371	0.000689532	0.173417	3.49883	2.33124	11.8613	34.0417	11.9506	4.06184	0	0	0	0	0	protein_coding
56	ENSECAG00000039619	28.7106	-1.98337	0.583661	-3.39815	0.000678436	0.173417	3.49883	8.15935	11.8613	10.2125	23.9011	51.45	91.0606	19.9743	52.3925	14.5953	NEURL1B	protein_coding
57	ENSECAG00000015069	100.63	-1.08082	0.319697	-3.38077	0.000722822	0.176108	38.4871	85.0904	54.5618	64.6792	78.8737	140.81	237.769	87.2211	114.818	103.991	BHLHE40	protein_coding
58	ENSECAG00000044996	5.53928	4.17578	1.23794	3.37316	0.000743106	0.176108	5.83138	11.6562	11.8613	13.6167	8.36539	4.06184	0	0	0	0	0	lncRNA
59	ENSECAG00000046453	3.67415	5.59311	1.65942	3.37053	0.000750245	0.176108	3.49883	0	13.0474	2.26945	17.9258	0	0	0	0	0	0	lncRNA
60	ENSECAG00000052550	4.87368	4.71882	1.3989	3.37323	0.000742918	0.176108	2.33255	1.16562	21.3503	4.53889	16.7308	1.35395	1.26473	0	0	0	0	lncRNA
61	ENSECAG00000020431	1020.66	-0.564409	0.168094	-3.3577	0.000785946	0.177326	962.178	769.311	687.954	677.43	1019.38	1360.72	1320.38	973.414	1379.48	1056.33	SGK1	protein_coding
62	ENSECAG00000042594	4.15647	5.14625	1.53174	3.35973	0.000780188	0.177326	4.66511	0	16.6058	3.40417	15.5357	1.35395	0	0	0	0	0	lncRNA
63	ENSECAG00000052696	12.0132	3.56688	1.0631	3.35515	0.000793208	0.177326	11.6628	23.3124	23.7225	14.7514	35.8517	10.8316	0	0	0	0	0	protein_coding
64	ENSECAG00000006259	2.81816	5.21112	1.56029	3.33983	0.000838304	0.177551	4.66511	1.16562	7.11676	5.67361	9.56045	0	0	0	0	0	ASAH2	protein_coding
65	ENSECAG00000011086	168.459	-1.02714	0.307941	-3.33551	0.000851421	0.177551	191.269	79.2623	88.9595	112.338	81.2638	219.339	385.743	201.74	141.014	183.657	PPP1R3B	protein_coding
66	ENSECAG00000021452	101.27	-1.13288	0.340791	-3.32427	0.000886498	0.177551	36.1546	54.7842	43.8867	98.7209	82.4589	163.827	208.68	137.157	116.49	70.5437	BUB1B	protein_coding
67	ENSECAG00000024034	110.599	-1.15557	0.347418	-3.32617	0.000880494	0.177551	36.1546	86.256	100.821	72.6223	45.4121	270.789	161.885	112.522	86.9492	132.574	TTBK2	protein_coding
68	ENSECAG00000032213	7.27223	3.99428	1.20248	3.32169	0.000894737	0.177551	6.99766	6.99373	21.3503	5.67361	26.2912	5.41578	0	0	0	0	0	lncRNA
69	ENSECAG00000038539	235.995	-0.884367	0.265624	-3.3294	0.000870342	0.177551	159.78	139.875	123.357	140.706	264.107	278.913	507.157	242.355	251.93	251.768	UBALD2	protein_coding
70	ENSECAG00000046542	115.819	-10.0727	3.02645	-3.32823	0.000873991	0.177551	0	0	0	0	0	0	0	204.404	478.221	475.562	0	protein_coding
71	ENSECAG00000052116	62.5574	-1.15916	0.348977	-3.32159	0.000895067	0.177551	26.8244	40.7968	48.6312	32.907	43.022	124.563	125.208	45.9409	70.7856	66.8949	EPB41L5	protein_coding
72	ENSECAG00000018196	66.3588	-1.68768	0.510506	-3.3059	0.000946706	0.185186	29.1569	79.2623	17.7919	12.482	17.9258	129.979	175.797	82.5604	26.1962	92.4366	C30H1orf115	protein_coding
73	ENSECAG00000014376	3.50741	5.52742	1.67978	3.29056	0.000999893	0.192911	9.33021	0	16.6058	7.94306	1.19506	0	0	0	0	0	C28H12orf50	protein_coding
74	ENSECAG00000057712	347.411	0.91153	0.277528	3.28446	0.00102178	0.194469	423.358	243.615	499.359	620.693	483.998	213.923	136.591	175.774	327.732	349.07	0	lncRNA
75	ENSECAG00000004817	68.8274	-1.04407	0.318579	-3.27727	0.00104815	0.196829	32.6557	50.1217	55.748	38.5806	46.6072	89.3604	150.503	77.234	56.8514	90.6122	CDKN2C	protein_coding
76	ENSECAG00000007560	666.598	-0.503881	0.154163	-3.2685	0.00108118	0.197758	558.646	433.611	601.366	647.927	513.874	943.7	694.337	808.959	730.151	733.411	FXR1	protein_coding
77	ENSECAG00000039203	2671.48	-0.540805	0.165275	-3.27215	0.00106733	0.197758	1675.94	2997.98	1796.98	2039.1	2373.38	3043.67	3006.26	3747.84	3087.81	2945.81	SOX4	protein_coding
78	ENSECAG00000000540	180.244	-0.803633	0.246589	-3.25899	0.00111808	0.201885	86.3045	123.556	174.361	171.343	100.385	295.16	180.856	259	182.816	228.659	CCDC174	protein_coding
79	ENSECAG00000048942	3.07651	5.33689	1.64371	3.24686	0.00116686	0.208027	2.33255	2.33124	1.18613	3.40417	21.511	0	0	0	0	0	0	lncRNA
80	ENSECAG00000020101	8.53354	4.36955	1.35104	3.23421	0.0012198	0.209508	9.33021	0	48.6312	21.5597	1.19506	4.06184	0	0	0.557367	0	SLC24A2	protein_coding
81	ENSECAG00000021651	3.23299	-4.9031	1.51556	-3.23517	0.00121571	0.209508	0	0	0	0	0	4.06184	11.3826	10.653	5.0163	1.21627	NPC1	protein_coding
82	ENSECAG00000045060	63.3512	1.83163	0.56579	3.23729	0.0012067	0.209508	297.401	86.256	20.1642	31.7722	58.5577	41.9723	22.7651	12.6504	33.9994	27.9742	0	lncRNA
83	ENSECAG00000045809	3.51728	-5.00667	1.55011	-3.22988	0.00123843	0.210145	0	0	0	0	0	14.8934	10.1178	7.32391	2.22947	0.608135	0	pseudogene
84	ENSECAG00000006840	48.4564	-1.73299	0.537861	-3.22201	0.00127294	0.211725	6.99766	10.4906	60.4925	19.2903	14.3407	97.4841	126.473	77.8998	33.9994	37.0963	B3GNT7	protein_coding
85	ENSECAG00000027672	1203	0.808719	0.251083	3.22092	0.00127781	0.211725	842.052	2687.92	1811.22	1215.29	1103.04	670.203	877.723	990.06	972.605	859.903	MT-CO3	protein_coding
86	ENSECAG00000000392	23.8277	-1.51464	0.47831	-3.16666	0.00154202	0.222323	16.3279	6.99373	17.7919	13.6167	7.17034	33.8487	26.5593	59.9229	25.6389	30.4068	DCAF1	protein_coding
87	ENSECAG00000006607	118.926	-0.750377	0.238336	-3.1484	0.00164169	0.222323	60.6464	92.0841	96.0763	104.395	88.4341	174.659	188.445	139.154	130.424	114.938	KIF11	protein_coding
88	ENSECAG00000006772	89.2526	-0.904105	0.285544	-3.16626	0.00154412	0.222323	44.3185	82.7592	66.4231	55.6014	60.9479	90.7144	184.651	103.201	111.473	92.4366	DYSF	protein_coding
89	ENSECAG00000010510	608.518	0.678279	0.212206	3.19633	0.00139188	0.222323	504.998	652.748	915.69	744.378	930.949	373.689	328.83	555.951	470.418	607.527	SEMA4F	protein_coding
90	ENSECAG00000011641	2.92999	5.26761	1.67054	3.15324	0.00161467	0.222323	9.33021	0	5.93064	5.67361	8.36539	0	0	0	0	0	TVP23A	protein_coding
91	ENSECAG00000015212	5.85391	-3.94188	1.24658	-3.16215	0.00156609	0.222323	0	0	3.55838	0	0	24.371	10.1178	6.6581	8.3605	5.47322	MT3	protein_coding
92	ENSECAG00000019099	2.93574	5.27022	1.67267	3.15078	0.00162833	0.222323	6.99766	0	5.93064	5.67361	10.7555	0	0	0	0	0	TENM1	protein_coding
93	ENSECAG00000022931	246.048	-0.66254	0.210373	-3.14937	0.00163625	0.222323	145.785	207.481	180.291	188.364	228.256	345.256	400.919	283.635	212.914	267.58	TCF7L1	protein_coding
94	ENSECAG00000023741	54.8613	1.22898	0.386339	3.18109	0.00146723	0.222323	46.6511	163.187	67.6092	49.9278	57.3627	28.4329	35.4124	28.6298	30.6552	40.7451	EGR3	protein_coding
95	ENSECAG00000033470	219.733	-0.71292	0.225356	-3.16353	0.0015587	0.222323	122.459	122.39	177.919	230.349	178.063	370.981	246.622	266.99	227.963	253.592	0	protein_coding
96	ENSECAG00000044148	4.86976	4.7062	1.48634	3.1663	0.0015439	0.222323	0	9.32498	10.6751	5.67361	20.316	2.70789	0	0	0	0	0	protein_coding
97	ENSECAG00000047002	88.6831	1.01821	0.318689	3.195	0.00139832	0.222323	160.946	159.69	103.193	116.876	54.9726	41.9723	43.0008	65.9152	75.8019	64.4624	0	protein_coding
98	ENSECAG00000048145	2.45246	5.01143	1.57707	3.17767	0.00148463	0.222323	2.33255	6.99373	4.74451	5.67361	4.78022	0	0	0	0	0	0	lncRNA
99	ENSECAG00000050721	4.85867	5.37901	1.68977	3.18328	0.00145619	0.222323	0	0	35.5838	5.67361	5.97528	1.35395	0	0	0	0	0	lncRNA
100	ENSECAG00000050943	3.31226	5.44371	1.7239	3.15779	0.00158968	0.222323	2.33255	0	21.3503	2.26945	7.17034	0	0	0	0	0	0	lncRNA
101	ENSECAG00000051175	3.05475	5.32751	1.67425	3.18203	0.00146246	0.222323	4.66511	0	14.2335	5.67361	5.97528	0	0	0	0	0	0	lncRNA
102	ENSECAG00000051754	3.54037	4.90704	1.55114	3.1635	0.00155882	0.222323	3.49883	0	13.0474	7.94306	9.56045	1.35395	0	0	0	0	0	lncRNA
103	ENSECAG00000056483	3.3179	5.44598	1.7119	3.18125	0.00146639	0.222323	4.66511	0	14.2335	1.13472	13.1456	0	0	0	0	0	0	lncRNA
104	ENSECAG00000059516	9.09219	4.27085	1.33894	3.18973	0.00142407	0.222323	3.49883	0	34.3977	26.0986	21.511	5.41578	0	0	0	0	0	lncRNA
105	ENSECAG00000049199	3.65063	4.95332	1.57635	3.14226	0.00167646	0.22487	1.16628	20.9812	10.6751	1.13472	1.19506	1.35395	0	0	0	0	0	lncRNA
106	ENSECAG00000022565	65.0106	-1.44428	0.460286	-3.13779	0.00170226	0.226175	13.9953	43.128	80.6566	12.482	23.9011	135.395	134.061	61.2545	67.9988	77.2332	ATF7IP2	protein_coding
107	ENSECAG00000026611	7.79877	-3.62171	1.15627	-3.13225	0.00173474	0.228337	2.33255	0	1.18613	2.26945	0	40.6184	0	10.653	10.59	10.3383	Vault	vault_RNA
108	ENSECAG00000000369	108.733	-0.853634	0.275342	-3.10027	0.00193346	0.233734	97.9672	51.2874	81.8428	86.2389	70.5083	167.889	77.1485	172.445	128.752	153.25	CERS4	protein_coding
109	ENSECAG00000000924	6.18316	4.26067	1.37589	3.09668	0.00195702	0.233734	13.9953	2.33124	27.2809	0	14.3407	1.35395	2.52946	0	0	0	GABRA2	protein_coding
110	ENSECAG00000006674	41.5409	-1.65129	0.53328	-3.09649	0.00195829	0.233734	8.16394	11.6562	24.9087	38.5806	16.7308	128.625	13.912	65.2494	40.6878	66.8949	RRAD	protein_coding
111	ENSECAG00000012445	1278.63	-0.551467	0.177127	-3.11339	0.00184952	0.233734	902.698	1003.6	946.529	1154.01	1175.94	1903.65	1711.18	1729.11	1184.4	1075.18	CHD1	protein_coding
112	ENSECAG00000015060	34.1855	-1.54661	0.497587	-3.10822	0.0018822	0.233734	10.4965	22.1468	13.0474	17.0208	23.9011	60.9276	91.0606	27.2982	60.753	15.2034	PRR11	protein_coding
113	ENSECAG00000019790	5.04504	3.51347	1.12654	3.11881	0.00181585	0.233734	3.49883	13.9875	14.2335	5.67361	9.56045	0	0	0	1.6721	1.82441	CAMK2A	protein_coding
114	ENSECAG00000023071	492.127	-0.653693	0.210179	-3.11017	0.0018698	0.233734	312.562	289.074	432.936	382.402	493.558	606.568	848.634	623.198	506.647	425.695	DDIAS	protein_coding
115	ENSECAG00000026935	24.2348	-1.70985	0.550842	-3.10406	0.00190883	0.233734	20.993	10.4906	14.2335	5.67361	4.78022	69.0512	46.795	18.6427	20.0652	31.623	SPIDR	protein_coding
116	ENSECAG00000028144	295.559	0.859451	0.277299	3.09937	0.00193936	0.233734	242.586	332.202	706.932	359.707	261.717	258.604	265.593	165.121	199.537	163.588	TXNIP	protein_coding
117	ENSECAG00000044415	3.74442	5.62167	1.80156	3.12044	0.00180581	0.233734	0	0	17.7919	12.482	7.17034	0	0	0	0	0	0	lncRNA
118	ENSECAG00000059373	7.94642	3.20199	1.02864	3.11282	0.00185309	0.233734	9.33021	10.4906	22.5364	14.7514	13.1456	5.41578	3.79419	0	0	0	0	lncRNA
119	ENSECAG00000046482	9.73621	3.81837	1.2342	3.09379	0.00197619	0.233888	1.16628	1.16562	67.6092	4.53889	15.5357	5.41578	1.26473	0.66581	0	0	0	lncRNA
120	ENSECAG00000033016	140.178	-2.9424	0.953558	-3.0857	0.00203071	0.238338	87.4707	0	35.5838	22.6945	15.5357	625.523	99.9137	182.432	167.21	165.413	HSPA6	protein_coding
121	ENSECAG00000011994	3.68989	-4.45796	1.4467	-3.08147	0.00205979	0.239753	0	0	1.18613	0	0	9.47762	12.6473	0.66581	5.0163	7.90576	CYFIP2	protein_coding
122	ENSECAG00000013053	555.461	-0.885345	0.288011	-3.07399	0.00211214	0.243831	205.265	379.993	313.138	521.973	528.215	1003.27	1106.64	484.71	439.762	571.647	TOP2A	protein_coding
123	ENSECAG00000041852	31.2788	-1.51511	0.493884	-3.06774	0.00215688	0.244979	5.83138	9.32498	41.5144	14.7514	9.56045	55.5118	45.5303	45.2751	36.2288	49.259	0	protein_coding
124	ENSECAG00000053852	3.889	5.04789	1.64481	3.06898	0.00214789	0.244979	2.33255	1.16562	26.0948	7.94306	0	1.35395	0	0	0	0	0	protein_coding
125	ENSECAG00000021328	38.2276	1.05802	0.347297	3.04644	0.00231566	0.256802	40.8197	61.778	47.4451	48.7931	60.9479	13.5395	24.0299	23.3034	31.2125	30.4068	COMMD3	protein_coding
126	ENSECAG00000036105	90.4176	-1.20723	0.396101	-3.04777	0.00230548	0.256802	29.1569	38.4655	45.0728	82.8348	76.4836	220.693	154.297	109.859	45.1467	102.167	0	protein_coding
127	ENSECAG00000042356	481.276	0.729331	0.23938	3.04675	0.00231329	0.256802	289.237	578.149	835.033	737.57	564.066	296.514	311.124	358.206	380.682	462.183	COL5A1	protein_coding
128	ENSECAG00000052262	4.76043	4.66663	1.53371	3.04272	0.00234453	0.25694	0	5.82811	24.9087	3.40417	10.7555	2.70789	0	0	0	0	0	lncRNA
129	ENSECAG00000059576	3.5349	5.53806	1.82078	3.04158	0.0023534	0.25694	0	0	10.6751	7.94306	16.7308	0	0	0	0	0	0	lncRNA
130	ENSECAG00000021069	97.6552	-0.84591	0.278757	-3.03458	0.00240869	0.257	101.466	54.7842	71.1676	48.7931	71.7034	161.12	145.444	94.545	92.5229	135.006	PXK	protein_coding
131	ENSECAG00000030680	1238.71	0.413287	0.136083	3.03703	0.00238924	0.257	1710.93	1312.49	1434.03	1217.56	1403	1005.98	933.371	1029.34	1198.34	1142.08	0	protein_coding
132	ENSECAG00000043848	3.31932	5.44671	1.79452	3.0352	0.00240378	0.257	0	1.16562	23.7225	1.13472	7.17034	0	0	0	0	0	0	protein_coding
133	ENSECAG00000004288	125.768	0.862445	0.284791	3.02835	0.00245897	0.258448	187.771	132.881	215.875	133.897	143.407	44.6802	92.3253	68.5784	121.506	116.762	CTSV	protein_coding
134	ENSECAG00000043664	3.44081	4.86365	1.6049	3.0305	0.00244151	0.258448	5.83138	0	18.978	2.26945	5.97528	1.35395	0	0	0	0	0	lncRNA
135	ENSECAG00000022797	215.328	0.718674	0.237698	3.02347	0.00249893	0.258786	188.937	250.609	319.068	248.504	335.811	124.563	112.561	183.098	230.193	159.94	LEPROTL1	protein_coding
136	ENSECAG00000046546	6.24203	4.25325	1.40632	3.02438	0.00249146	0.258786	0	6.99373	9.48902	21.5597	20.316	4.06184	0	0	0	0	0	lncRNA
137	ENSECAG00000021586	41.6925	-1.71066	0.566375	-3.02037	0.00252468	0.259544	6.99766	15.1531	49.8173	20.425	4.78022	47.3881	142.914	55.2622	33.442	40.7451	FBP1	protein_coding
138	ENSECAG00000047914	14.8813	2.00239	0.664376	3.01394	0.00257876	0.263183	12.829	23.3124	23.7225	37.4459	21.511	13.5395	0	3.32905	9.47524	3.64881	0	lncRNA
139	ENSECAG00000008506	69.3314	-1.00322	0.333373	-3.00929	0.00261856	0.265322	31.4895	43.128	41.5144	49.9278	63.338	155.704	98.6489	55.2622	81.9329	72.3681	HMMR	protein_coding
140	ENSECAG00000011738	106.027	0.868742	0.289588	2.99992	0.00270051	0.270443	151.616	165.518	153.01	98.7209	118.311	56.8657	54.3834	116.517	93.6376	51.6915	GET4	protein_coding
141	ENSECAG00000018026	2.80598	-4.68591	1.56242	-2.99913	0.0027075	0.270443	0	0	0	0	0	5.41578	12.6473	1.33162	5.0163	3.64881	EPS8L3	protein_coding
142	ENSECAG00000021261	147.187	-0.725437	0.242594	-2.99034	0.00278671	0.274461	115.461	115.397	104.379	112.338	105.165	222.047	246.622	107.861	191.177	151.426	TUT4	protein_coding
143	ENSECAG00000045902	136.508	-1.10144	0.368262	-2.99091	0.00278146	0.274461	75.808	120.059	104.379	98.7209	35.8517	177.367	55.6481	264.992	188.39	243.862	0	protein_coding
144	ENSECAG00000006280	290.256	-0.599615	0.200916	-2.98441	0.00284127	0.275318	214.595	229.628	231.295	285.95	190.014	502.314	319.977	347.553	275.339	305.892	LPIN2	protein_coding
145	ENSECAG00000023455	13.2676	-2.03608	0.6824	-2.9837	0.00284783	0.275318	2.33255	3.49687	5.93064	5.67361	8.36539	50.096	7.58838	13.3162	20.0652	15.8115	NUMA1	protein_coding
146	ENSECAG00000052137	3.81095	5.0166	1.68171	2.98304	0.00285405	0.275318	8.16394	1.16562	0	1.13472	26.2912	1.35395	0	0	0	0	0	lncRNA
147	ENSECAG00000002610	277.725	0.960282	0.323241	2.97079	0.00297034	0.278102	377.874	194.659	397.353	254.178	613.064	129.979	118.885	219.052	337.207	135.006	MRO	protein_coding
148	ENSECAG00000015997	3.17575	5.38358	1.81288	2.96962	0.00298164	0.278102	1.16628	0	23.7225	5.67361	1.19506	0	0	0	0	0	ESRRG	protein_coding
149	ENSECAG00000040848	3.40914	5.48598	1.84493	2.97355	0.00294378	0.278102	0	0	18.978	7.94306	7.17034	0	0	0	0	0	0	lncRNA
150	ENSECAG00000044967	2.86722	-4.72328	1.58637	-2.97742	0.00290684	0.278102	0	0	0	0	0	13.5395	1.26473	7.98972	2.22947	3.64881	0	protein_coding
151	ENSECAG00000045651	3.16166	4.73807	1.59485	2.97086	0.00296972	0.278102	1.16628	20.9812	1.18613	4.53889	2.39011	1.35395	0	0	0	0	0	lncRNA
152	ENSECAG00000022971	93.0133	-0.837516	0.282435	-2.96534	0.00302351	0.278938	68.8103	97.9123	49.8173	45.3889	70.5083	159.766	135.326	103.201	87.5066	111.897	PLXNC1	protein_coding
153	ENSECAG00000041001	28.2896	-1.33751	0.451152	-2.96466	0.00303021	0.278938	9.33021	19.8156	17.7919	14.7514	17.9258	62.2815	43.0008	47.2725	17.2784	33.4474	0	protein_coding
154	ENSECAG00000020931	552.523	0.475977	0.160708	2.96175	0.00305892	0.279752	748.75	655.08	487.498	561.688	761.251	452.218	483.127	424.787	517.236	433.601	TRIM65	protein_coding
155	ENSECAG00000029766	185.826	-0.749428	0.254318	-2.94681	0.00321068	0.289867	73.4754	184.168	151.824	173.613	108.75	254.542	295.947	181.766	214.029	220.145	H2AX	protein_coding
156	ENSECAG00000044734	5.78887	4.13863	1.40396	2.94782	0.00320023	0.289867	11.6628	0	17.7919	13.6167	10.7555	4.06184	0	0	0	0	0	lncRNA
157	ENSECAG00000048479	2.83043	5.21712	1.77432	2.94035	0.00327845	0.2941	2.33255	0	2.37225	5.67361	17.9258	0	0	0	0	0	0	protein_coding
158	ENSECAG00000054990	31.843	-1.1509	0.392101	-2.93522	0.00333309	0.297109	17.4941	17.4843	22.5364	22.6945	17.9258	69.0512	41.7361	43.2777	40.6878	25.5417	CCNA2	protein_coding
159	ENSECAG00000009402	73.7801	-1.09087	0.372018	-2.9323	0.00336462	0.298033	36.1546	43.128	84.215	32.907	38.2418	135.395	149.238	83.2263	90.2934	45.002	VEGFA	protein_coding
160	ENSECAG00000057027	257.141	-0.713007	0.243987	-2.92232	0.00347434	0.305828	131.789	270.424	138.777	205.385	228.256	264.019	333.889	463.404	270.323	265.147	0	protein_coding
161	ENSECAG00000000085	513.631	-0.572745	0.196484	-2.91498	0.00355717	0.309254	430.356	367.171	330.929	366.515	567.652	682.389	792.986	623.198	504.417	470.697	AGA	protein_coding
162	ENSECAG00000034847	3.90684	-5.20149	1.78331	-2.91676	0.00353687	0.309254	0	0	0	0	0	0	0	4.66067	16.1636	18.2441	0	protein_coding
163	ENSECAG00000048044	2.48238	5.02737	1.72916	2.9074	0.00364448	0.314901	2.33255	1.16562	16.6058	1.13472	3.58517	0	0	0	0	0	0	protein_coding
164	ENSECAG00000013663	4.92066	4.14233	1.42597	2.90492	0.00367345	0.315469	1.16628	0	7.11676	31.7722	5.97528	1.35395	1.26473	0	0.557367	0	0	protein_coding
165	ENSECAG00000053589	3.96694	4.39402	1.51405	2.90215	0.00370606	0.31634	1.16628	1.16562	14.2335	19.2903	1.19506	1.35395	1.26473	0	0	0	0	lncRNA
166	ENSECAG00000016700	2.47332	5.02255	1.73226	2.89942	0.00373849	0.316582	1.16628	10.4906	1.18613	1.13472	10.7555	0	0	0	0	0	VAT1	protein_coding
167	ENSECAG00000049796	3.02219	-4.81569	1.66165	-2.89814	0.00375384	0.316582	0	0	0	0	0	9.47762	0	11.3188	3.3442	6.08135	0	protein_coding
168	ENSECAG00000003315	491.801	-0.718863	0.248353	-2.89452	0.00379736	0.318346	470.009	356.68	359.396	385.806	284.423	721.653	885.311	643.173	283.7	527.862	IRS2	protein_coding
169	ENSECAG00000020360	63.3067	0.793546	0.274468	2.89121	0.00383761	0.319816	92.1359	74.5998	81.8428	73.757	81.2638	35.2026	36.6772	47.2725	64.0972	46.2183	TMEM260	protein_coding
170	ENSECAG00000002083	165.508	1.15531	0.402335	2.87151	0.00408518	0.32072	506.164	139.875	249.087	161.131	87.2391	81.2368	64.5012	126.504	62.9825	176.359	KCTD12	protein_coding
171	ENSECAG00000007294	125.792	0.721624	0.250657	2.87893	0.00399031	0.32072	139.953	198.156	112.682	188.364	143.407	128.625	63.2365	107.861	88.064	87.5715	PIGT	protein_coding
172	ENSECAG00000007611	293.815	0.503176	0.174327	2.88639	0.00389686	0.32072	270.576	338.03	412.772	400.557	302.349	234.233	212.475	253.674	237.996	275.485	INF2	protein_coding
173	ENSECAG00000008226	155.422	-0.61809	0.215177	-2.87248	0.00407269	0.32072	129.457	141.04	124.543	124.82	92.0193	182.783	236.505	215.057	163.866	144.128	NPAT	protein_coding
174	ENSECAG00000008466	106.317	-0.856795	0.298671	-2.86869	0.00412172	0.32072	34.9883	88.5873	73.5399	98.7209	81.2638	132.687	208.68	102.535	118.719	123.451	BIRC5	protein_coding
175	ENSECAG00000011581	59.0136	1.52229	0.530354	2.87033	0.0041004	0.32072	52.4824	19.8156	201.642	115.742	48.9973	14.8934	24.0299	51.2674	15.0489	46.2183	0	protein_coding
176	ENSECAG00000014948	108.212	-0.947085	0.32873	-2.88104	0.00396364	0.32072	27.9906	75.7654	56.9341	106.664	101.58	185.491	136.591	177.105	107.572	106.424	CIP2A	protein_coding
177	ENSECAG00000017567	28.1676	1.35437	0.471022	2.87539	0.00403532	0.32072	71.1429	19.8156	54.5618	38.5806	17.9258	17.6013	17.7062	19.3085	12.2621	12.7708	NMUR1	protein_coding
178	ENSECAG00000019708	4.92179	-3.69863	1.28429	-2.8799	0.00397796	0.32072	0	3.49687	0	0	0	5.41578	17.7062	4.66067	10.0326	7.90576	PIK3CG	protein_coding
179	ENSECAG00000027699	23783	-0.458117	0.158793	-2.88501	0.00391407	0.32072	20434.3	24722.8	18857	20713.2	15460.4	33190.6	32097.6	25324.8	25463.3	21565.7	0	Mt_rRNA
180	ENSECAG00000047957	2.55111	5.06907	1.76496	2.87206	0.00407808	0.32072	8.16394	0	4.74451	10.2125	2.39011	0	0	0	0	0	0	lncRNA
181	ENSECAG00000049590	3.65787	4.95613	1.72417	2.8745	0.00404666	0.32072	0	10.4906	0	6.80834	17.9258	1.35395	0	0	0	0	0	lncRNA
182	ENSECAG00000018428	919.392	-1.72422	0.601544	-2.86632	0.00415276	0.321359	267.077	418.458	399.725	667.217	383.613	2469.6	137.856	1908.21	1233.45	1308.71	HSPH1	protein_coding
183	ENSECAG00000017156	353.142	-0.519237	0.181277	-2.86433	0.00417886	0.321612	342.885	311.221	253.831	215.597	326.25	419.723	518.539	346.221	395.173	401.978	ST3GAL4	protein_coding
184	ENSECAG00000001101	32.9163	-1.03698	0.362495	-2.86067	0.00422741	0.323395	24.4918	22.1468	17.7919	23.8292	19.1209	43.3263	58.1776	45.9409	45.1467	29.1905	SESN1	protein_coding
185	ENSECAG00000003532	7.03422	-3.44819	1.20603	-2.85914	0.00424794	0.323395	0	1.16562	2.37225	1.13472	1.19506	33.8487	3.79419	7.32391	19.5078	0	IFNAR2	protein_coding
186	ENSECAG00000051848	4.42583	4.55165	1.5934	2.85655	0.00428269	0.324287	1.16628	0	13.0474	1.13472	26.2912	1.35395	1.26473	0	0	0	0	lncRNA
187	ENSECAG00000008310	57.6517	0.790913	0.277954	2.84548	0.00443442	0.331593	86.3045	76.9311	69.9815	61.275	71.7034	33.8487	41.7361	47.2725	34.5567	52.9078	ADNP2	protein_coding
188	ENSECAG00000020066	25.1204	-1.8841	0.662394	-2.84438	0.0044498	0.331593	4.66511	10.4906	1.18613	23.8292	13.1456	86.6525	7.58838	39.9486	28.4257	35.2719	DNAJB1	protein_coding
189	ENSECAG00000020920	29.2044	-1.42685	0.501627	-2.84445	0.00444888	0.331593	4.66511	8.15935	27.2809	14.7514	23.9011	44.6802	73.3543	27.2982	35.1141	32.8393	NEK2	protein_coding
190	ENSECAG00000016382	81.9268	-0.935423	0.329204	-2.84147	0.00449057	0.33287	37.3209	60.6123	71.1676	71.4875	39.4369	113.731	177.062	61.9203	101.998	84.5308	ANLN	protein_coding
191	ENSECAG00000020605	153.98	-0.758675	0.267162	-2.83976	0.00451478	0.332912	92.1359	73.4342	171.988	133.897	100.385	200.384	207.416	145.147	264.192	150.818	TRIM2	protein_coding
192	ENSECAG00000001609	4.57885	3.81205	1.34484	2.83459	0.00458852	0.33344	8.16394	10.4906	5.93064	14.7514	2.39011	4.06184	0	0	0	0	STX19	protein_coding
193	ENSECAG00000009470	465.347	0.622533	0.219605	2.83478	0.00458572	0.33344	417.527	735.508	610.855	705.798	353.737	282.975	332.624	353.545	409.665	451.236	ZNF503	protein_coding
194	ENSECAG00000009716	44.3902	-1.06496	0.376276	-2.83027	0.00465087	0.33344	18.6604	17.4843	28.467	36.3111	41.827	62.2815	93.59	57.2597	41.8025	46.2183	CDK1	protein_coding
195	ENSECAG00000011729	24.339	1.47133	0.520744	2.82543	0.00472173	0.33344	68.8103	29.1406	33.2116	13.6167	34.6566	8.12368	11.3826	24.635	9.47524	10.3383	ST6GAL2	protein_coding
196	ENSECAG00000012659	84.9498	0.813936	0.287552	2.83057	0.00464649	0.33344	89.8033	71.1029	177.919	86.2389	115.92	70.4052	60.707	56.5939	55.7367	65.0705	PRKAG2	protein_coding
197	ENSECAG00000013923	847.251	-0.404106	0.14307	-2.82453	0.00473501	0.33344	790.736	653.914	712.862	747.782	737.35	1103.47	1147.11	898.178	798.707	882.404	SMG1	protein_coding
198	ENSECAG00000018069	268.814	-0.548097	0.194046	-2.82457	0.0047344	0.33344	219.26	238.953	224.178	192.903	215.11	319.531	404.714	266.99	378.452	228.051	ARAP2	protein_coding
199	ENSECAG00000036377	3.89564	4.36494	1.5428	2.82923	0.00466594	0.33344	5.83138	0	7.11676	7.94306	15.5357	0	2.52946	0	0	0	0	lncRNA
200	ENSECAG00000055050	2.71449	5.15676	1.82403	2.82712	0.00469688	0.33344	0	5.82811	17.7919	1.13472	2.39011	0	0	0	0	0	0	lncRNA
201	ENSECAG00000034552	2.92782	4.62209	1.63899	2.82009	0.00480097	0.336403	2.33255	13.9875	5.93064	5.67361	0	1.35395	0	0	0	0	PNMA8C	protein_coding
202	ENSECAG00000041510	35.9235	-1.12328	0.398878	-2.81609	0.00486122	0.338938	10.4965	22.1468	35.5838	17.0208	27.4863	60.9276	50.5892	46.6067	31.2125	57.1647	0	protein_coding
203	ENSECAG00000046443	2.9031	4.61038	1.64918	2.79556	0.00518103	0.359456	2.33255	4.66249	5.93064	14.7514	0	1.35395	0	0	0	0	0	lncRNA
204	ENSECAG00000000733	108.729	0.655168	0.234749	2.79093	0.00525575	0.360478	146.951	155.028	109.124	98.7209	156.552	78.5289	69.5602	100.537	78.0314	94.261	C8H18orf21	protein_coding
205	ENSECAG00000023938	3.21489	4.76514	1.708	2.78989	0.00527255	0.360478	1.16628	0	13.0474	1.13472	15.5357	0	1.26473	0	0	0	CDK15	protein_coding
206	ENSECAG00000049813	3.09964	4.70602	1.68603	2.79119	0.00525152	0.360478	2.33255	0	15.4197	1.13472	10.7555	1.35395	0	0	0	0	0	protein_coding
207	ENSECAG00000016232	35.3209	-1.35851	0.487903	-2.78438	0.00536302	0.364892	20.993	8.15935	37.9561	15.8861	15.5357	54.1578	89.7958	47.9383	18.3931	44.3939	IL22RA1	protein_coding
208	ENSECAG00000013161	3.83856	3.72185	1.34105	2.77532	0.00551469	0.365257	8.16394	18.65	2.37225	1.13472	4.78022	1.35395	1.26473	0.66581	0	0	ZNF471	protein_coding
209	ENSECAG00000016380	3.19413	5.39157	1.9443	2.77301	0.00555408	0.365257	0	10.4906	0	1.13472	20.316	0	0	0	0	0	MLIP	protein_coding
210	ENSECAG00000016415	436.238	-0.413938	0.149057	-2.77704	0.0054856	0.365257	403.532	362.508	329.743	414.174	357.322	555.118	576.717	439.435	466.516	457.318	MYO9A	protein_coding
211	ENSECAG00000034963	2.48197	5.02729	1.81109	2.77584	0.00550596	0.365257	2.33255	0	13.0474	2.26945	7.17034	0	0	0	0	0	0	lncRNA
212	ENSECAG00000047560	4.61505	3.81246	1.37548	2.77173	0.00557585	0.365257	11.6628	1.16562	14.2335	4.53889	10.7555	0	3.79419	0	0	0	0	lncRNA
213	ENSECAG00000050590	2.91583	5.2611	1.89502	2.77628	0.0054985	0.365257	0	9.32498	0	9.07778	10.7555	0	0	0	0	0	0	lncRNA
214	ENSECAG00000056317	2.4552	5.01286	1.80842	2.77195	0.0055721	0.365257	13.9953	0	2.37225	3.40417	4.78022	0	0	0	0	0	0	lncRNA
215	ENSECAG00000056631	5.76014	4.09016	1.47278	2.77717	0.00548338	0.365257	9.33021	2.33124	23.7225	18.1556	0	4.06184	0	0	0	0	0	lncRNA
216	ENSECAG00000009267	37.3201	0.931505	0.33645	2.76863	0.00562927	0.366607	60.6464	43.128	54.5618	43.1195	44.2171	25.725	17.7062	26.6324	23.4094	34.0556	THOC1	protein_coding
217	ENSECAG00000014384	96.7006	-0.908004	0.328094	-2.76752	0.00564851	0.366607	29.1569	59.4467	64.0509	118.011	64.533	148.934	163.15	93.2134	130.424	96.0854	AURKB	protein_coding
218	ENSECAG00000055974	8.2448	3.1843	1.15195	2.76427	0.00570511	0.368582	9.33021	3.49687	21.3503	32.907	5.97528	8.12368	1.26473	0	0	0	0	protein_coding
219	ENSECAG00000012038	16.2766	-1.56386	0.566881	-2.75872	0.00580285	0.371793	4.66511	17.4843	3.55838	7.94306	7.17034	25.725	36.6772	23.9692	16.721	18.8522	C2CD3	protein_coding
220	ENSECAG00000014832	715.509	-0.553025	0.200789	-2.75426	0.00588246	0.371793	416.361	602.627	709.304	645.657	523.435	1003.27	1078.81	913.491	678.316	583.81	0	protein_coding
221	ENSECAG00000021075	3.18445	-4.24221	1.54037	-2.75402	0.00588681	0.371793	1.16628	0	0	0	0	1.35395	17.7062	1.33162	7.24577	3.04068	FGD6	protein_coding
222	ENSECAG00000023322	482.57	-0.666921	0.242065	-2.75513	0.00586689	0.371793	289.237	403.305	176.733	497.009	499.533	519.915	516.01	567.936	708.971	647.056	ID3	protein_coding
223	ENSECAG00000058492	3.38459	4.84438	1.75845	2.75492	0.00587073	0.371793	0	0	4.74451	15.8861	11.9506	0	1.26473	0	0	0	0	lncRNA
224	ENSECAG00000016383	52.6053	-1.18086	0.429395	-2.75006	0.00595843	0.373547	19.8267	25.6437	22.5364	40.85	51.3874	92.0683	115.09	42.6118	88.064	27.9742	USP53	protein_coding
225	ENSECAG00000058822	5.55099	3.54312	1.28862	2.74955	0.00596763	0.373547	5.83138	3.49687	24.9087	14.7514	1.19506	4.06184	1.26473	0	0	0	0	protein_coding
226	ENSECAG00000025730	3.08046	5.33916	1.94326	2.74752	0.00600474	0.374207	0	3.49687	23.7225	0	3.58517	0	0	0	0	0	Vault	vault_RNA
227	ENSECAG00000015806	245.819	-0.984273	0.358623	-2.74459	0.0060586	0.374252	54.815	80.4279	151.824	278.007	259.327	454.926	390.802	300.28	279.798	207.982	CCNB1	protein_coding
228	ENSECAG00000019476	350.364	0.855508	0.311557	2.74591	0.00603429	0.374252	149.283	677.226	580.016	515.164	335.811	272.143	163.15	197.08	305.437	308.325	ACTN1	protein_coding
229	ENSECAG00000015342	7.86511	-3.12233	1.14108	-2.7363	0.00621343	0.382139	5.83138	1.16562	0	0	1.19506	5.41578	0	26.6324	18.9505	19.4603	CXCL8	protein_coding
230	ENSECAG00000024322	3.36217	-4.96139	1.81429	-2.73461	0.00624535	0.382433	0	0	0	0	0	0	18.971	0.66581	13.3768	0.608135	ARSJ	protein_coding
231	ENSECAG00000007762	169.537	-0.546311	0.199973	-2.73193	0.00629649	0.383179	141.119	123.556	125.729	137.301	158.942	246.418	235.24	196.414	168.882	161.764	TRIM59	protein_coding
232	ENSECAG00000049733	46.6594	0.811463	0.297117	2.73112	0.00631195	0.383179	69.9766	53.6186	61.6786	48.7931	63.338	36.5565	29.0888	39.9486	36.2288	27.3661	0	pseudogene
233	ENSECAG00000011486	40.3257	-1.60888	0.589489	-2.72928	0.00634722	0.383667	23.3255	26.8093	10.6751	29.5028	9.56045	59.5736	2.52946	102.535	65.7693	72.9763	ATF3	protein_coding
234	ENSECAG00000023874	624.238	1.38347	0.508666	2.7198	0.00653211	0.393155	137.621	988.448	1308.3	1367.34	711.058	404.83	263.064	291.625	345.01	425.087	SPINT1	protein_coding
235	ENSECAG00000049608	4.28311	3.69518	1.36093	2.71519	0.00662382	0.396978	2.33255	6.99373	9.48902	6.80834	13.1456	4.06184	0	0	0	0	0	lncRNA
236	ENSECAG00000019598	39.0168	-1.15126	0.4247	-2.71077	0.00671272	0.397235	48.9836	16.3187	14.2335	19.2903	22.7061	29.7868	55.6481	77.8998	45.7041	59.5973	LMTK2	protein_coding
237	ENSECAG00000046007	5.20522	3.46285	1.27703	2.71164	0.00669515	0.397235	2.33255	1.16562	15.4197	14.7514	13.1456	2.70789	2.52946	0	0	0	0	lncRNA
238	ENSECAG00000054207	2.23498	4.87653	1.79864	2.71123	0.0067035	0.397235	5.83138	6.99373	4.74451	0	4.78022	0	0	0	0	0	0	lncRNA
239	ENSECAG00000010059	88.1834	-1.25253	0.462736	-2.70679	0.00679377	0.397865	34.9883	65.2748	69.9815	52.1973	37.0467	151.642	288.358	64.5836	89.1787	28.5824	CA9	protein_coding
240	ENSECAG00000012686	3.44431	-5.01862	1.85488	-2.70563	0.00681742	0.397865	0	0	0	0	0	0	0	7.98972	3.3442	23.1091	SNCAIP	protein_coding
241	ENSECAG00000013756	246.021	0.574804	0.212579	2.70395	0.00685197	0.397865	310.23	245.946	359.396	240.561	317.885	203.092	131.532	224.378	170.554	256.633	RBIS	protein_coding
242	ENSECAG00000016673	2105.64	0.361507	0.133503	2.70786	0.00677179	0.397865	1855.55	2260.14	2411.4	2735.82	2580.13	1711.39	1709.91	1864.27	1877.21	2050.63	0	protein_coding
243	ENSECAG00000022301	289.316	0.577602	0.213662	2.70334	0.00686461	0.397865	432.689	431.28	277.554	335.878	256.937	230.171	163.15	250.345	219.603	295.554	PDXK	protein_coding
244	ENSECAG00000021132	175.904	-0.644878	0.239115	-2.69694	0.00699801	0.403935	102.632	148.034	112.682	108.933	212.72	236.941	260.534	215.057	177.243	184.265	AFF2	protein_coding
245	ENSECAG00000010911	2.77559	5.19071	1.92786	2.69247	0.00709241	0.405155	8.16394	0	0	13.6167	5.97528	0	0	0	0	0	INTS12	protein_coding
246	ENSECAG00000012601	47.8049	-1.28458	0.476968	-2.69321	0.00707667	0.405155	30.3232	17.4843	41.5144	12.482	37.0467	105.608	55.6481	98.5399	62.9825	16.4197	CEP85L	protein_coding
247	ENSECAG00000013188	74.3575	-1.06317	0.394957	-2.69186	0.00710546	0.405155	32.6557	44.2936	32.0254	63.5445	66.9231	146.226	156.827	33.9563	74.6872	92.4366	CDCA2	protein_coding
248	ENSECAG00000054183	5.20497	-4.36701	1.62516	-2.68712	0.00720704	0.40929	0	0	1.18613	0	1.19506	16.2474	10.1178	23.3034	0	0	0	lncRNA
249	ENSECAG00000024764	762.199	-0.496198	0.184837	-2.68452	0.0072634	0.410834	586.637	739.004	690.326	650.196	493.558	877.357	1204.02	885.527	888.443	606.919	ARHGAP18	protein_coding
250	ENSECAG00000012967	9.5591	-3.19074	1.19075	-2.67961	0.00737086	0.413319	1.16628	1.16562	1.18613	2.26945	3.58517	28.4329	27.8241	29.9615	0	0	PRKAA2	protein_coding
251	ENSECAG00000014059	68.9352	-1.01685	0.379388	-2.68025	0.00735672	0.413319	24.4918	29.1406	45.0728	77.1612	51.3874	64.9894	170.739	72.5733	67.4414	86.3552	ECT2	protein_coding
252	ENSECAG00000022275	496.481	-0.46759	0.174572	-2.6785	0.00739537	0.413319	493.335	410.299	330.929	419.847	427.83	676.973	540.04	708.422	454.811	502.32	MLEC	protein_coding
253	ENSECAG00000036130	19.2832	-1.83383	0.685944	-2.67343	0.0075079	0.416852	0	2.33124	11.8613	18.1556	9.56045	55.5118	34.1477	23.9692	24.5241	12.7708	ADRB1	protein_coding
254	ENSECAG00000050091	20.4139	-1.74007	0.65098	-2.67299	0.00751779	0.416852	10.4965	24.4781	7.11676	1.13472	3.58517	51.45	32.883	11.9846	37.9009	23.1091	0	lncRNA
255	ENSECAG00000056970	3.45855	4.87126	1.82337	2.67156	0.00754992	0.416992	0	0	22.5364	1.13472	9.56045	1.35395	0	0	0	0	0	lncRNA
256	ENSECAG00000001900	37.3927	-1.27368	0.477327	-2.66837	0.00762212	0.417704	16.3279	19.8156	41.5144	20.425	10.7555	71.7591	69.5602	54.5964	15.0489	54.1241	0	protein_coding
257	ENSECAG00000051776	3.94158	4.36632	1.63583	2.66917	0.00760388	0.417704	0	4.66249	21.3503	1.13472	9.56045	2.70789	0	0	0	0	0	lncRNA
258	ENSECAG00000014445	195.103	-0.80479	0.301803	-2.66661	0.00766209	0.418267	78.1405	110.734	232.481	118.011	169.698	335.779	288.358	253.674	128.194	235.957	COX4I2	protein_coding
259	ENSECAG00000019940	12.2641	-1.99503	0.748843	-2.66415	0.00771822	0.419704	4.66511	5.82811	13.0474	1.13472	0	20.3092	13.912	18.6427	12.2621	32.8393	AKAP6	protein_coding
260	ENSECAG00000037016	2.1799	4.22211	1.58583	2.6624	0.00775864	0.42028	2.33255	3.49687	7.11676	2.26945	5.97528	0	0	0	0	0.608135	0	lncRNA
261	ENSECAG00000008892	390.35	0.506167	0.190364	2.65895	0.00783843	0.421361	534.155	507.046	457.845	389.21	405.124	335.779	213.739	336.234	419.697	304.676	CISD1	protein_coding
262	ENSECAG00000045313	2.21212	4.86292	1.82814	2.66004	0.00781305	0.421361	2.33255	0	5.93064	9.07778	4.78022	0	0	0	0	0	0	lncRNA
263	ENSECAG00000020769	3.14728	-4.89098	1.84253	-2.6545	0.00794269	0.423995	0	0	0	0	0	0	0	9.98715	11.1473	10.3383	FGF1	protein_coding
264	ENSECAG00000022645	167.989	-0.617059	0.232476	-2.65429	0.00794765	0.423995	120.126	145.703	142.335	116.876	136.236	203.092	292.153	153.136	141.571	228.659	CUX1	protein_coding
265	ENSECAG00000011055	271.581	-0.692807	0.261276	-2.65162	0.00801055	0.424137	331.223	158.525	139.963	238.292	170.893	324.947	220.063	478.052	299.306	354.543	SPTY2D1	protein_coding
266	ENSECAG00000046260	7.84779	2.65606	1.00127	2.6527	0.00798516	0.424137	3.49883	18.65	17.7919	18.1556	8.36539	9.47762	1.26473	0.66581	0	0.608135	0	lncRNA
267	ENSECAG00000001560	41.3318	0.902065	0.342183	2.6362	0.00838394	0.426501	48.9836	73.4342	41.5144	68.0834	37.0467	27.0789	32.883	21.3059	29.5404	33.4474	SCO2	protein_coding
268	ENSECAG00000002887	9.05593	-2.74642	1.03922	-2.64278	0.00822293	0.426501	4.66511	3.49687	1.18613	1.13472	1.19506	5.41578	37.9419	23.9692	0	11.5546	H1-1	protein_coding
269	ENSECAG00000009100	36.6173	1.48002	0.560781	2.63921	0.00830995	0.426501	60.6464	113.065	56.9341	31.7722	8.36539	9.47762	8.85311	31.9589	18.9505	26.1498	SLCO4C1	protein_coding
270	ENSECAG00000013238	23.0229	-1.54256	0.583025	-2.64578	0.00815027	0.426501	5.83138	16.3187	3.55838	15.8861	16.7308	31.1408	73.3543	34.6221	13.9342	18.8522	FAM83D	protein_coding
271	ENSECAG00000015871	40.2176	-0.945459	0.359001	-2.63359	0.00844886	0.426501	16.3279	25.6437	33.2116	36.3111	25.0962	63.6355	70.8249	36.6196	50.7204	43.7858	CDCA8	protein_coding
272	ENSECAG00000016860	54.8843	-1.18911	0.449329	-2.64642	0.00813485	0.426501	18.6604	29.1406	10.6751	54.4667	53.7775	70.4052	134.061	61.9203	78.0314	37.7044	KIF20A	protein_coding
273	ENSECAG00000019626	172.722	-0.796176	0.301227	-2.64311	0.00821488	0.426501	75.808	157.359	88.9595	184.96	123.091	365.565	136.591	232.368	192.849	169.67	TENT5C	protein_coding
274	ENSECAG00000019780	104.324	-0.884608	0.335359	-2.6378	0.00834468	0.426501	39.6534	87.4217	52.1896	120.281	65.7281	177.367	170.739	151.139	107.572	71.1518	0	protein_coding
275	ENSECAG00000020872	1162.46	-0.466982	0.177014	-2.6381	0.00833709	0.426501	928.356	901.026	1101.91	882.814	1062.4	1492.05	1774.42	1448.14	1109.72	923.758	RTF1	protein_coding
276	ENSECAG00000023355	18.0766	-1.64698	0.624884	-2.63566	0.00839734	0.426501	4.66511	1.16562	13.0474	4.53889	20.316	31.1408	32.883	13.3162	32.3273	27.3661	GTSE1	protein_coding
277	ENSECAG00000054232	16.9959	-4.10373	1.55727	-2.6352	0.00840871	0.426501	1.16628	1.16562	2.37225	3.40417	1.19506	17.6013	115.09	27.964	0	0	0	protein_coding
278	ENSECAG00000057423	3.18233	4.74707	1.80214	2.63413	0.00843533	0.426501	0	3.49687	20.1642	6.80834	0	1.35395	0	0	0	0	0	lncRNA
279	ENSECAG00000058085	4.31047	-3.47593	1.31362	-2.64607	0.00814322	0.426501	0	0	2.37225	0	1.19506	2.70789	17.7062	6.6581	10.0326	2.43254	0	lncRNA
280	ENSECAG00000010655	228.219	0.648484	0.246542	2.63032	0.00853043	0.428297	323.059	301.896	315.51	307.51	145.797	219.339	113.826	169.116	173.898	212.239	STX4	protein_coding
281	ENSECAG00000016664	251.657	0.514056	0.195637	2.62761	0.00859873	0.428297	257.747	294.902	304.835	246.235	374.053	196.322	282.035	180.435	174.456	205.55	PPARG	protein_coding
282	ENSECAG00000019160	10.613	-1.64002	0.624219	-2.62732	0.00860609	0.428297	4.66511	9.32498	5.93064	3.40417	2.39011	18.9552	15.1768	15.9794	14.4915	15.8115	CDYL2	protein_coding
283	ENSECAG00000045407	109.442	0.798751	0.303764	2.62951	0.00855082	0.428297	151.616	216.806	118.613	105.529	103.97	43.3263	86.0016	70.5759	76.3593	121.627	0	protein_coding
284	ENSECAG00000057342	5.46756	3.5131	1.33964	2.62243	0.00873056	0.432962	0	10.4906	24.9087	5.67361	8.36539	2.70789	2.52946	0	0	0	0	lncRNA
285	ENSECAG00000024173	2.49314	-4.54713	1.73481	-2.62111	0.00876447	0.433119	0	0	0	0	0	5.41578	0	5.32648	4.45894	9.73017	RNF157	protein_coding
286	ENSECAG00000023443	2.67964	4.48851	1.71384	2.61898	0.00881932	0.434305	1.16628	0	4.74451	14.7514	4.78022	1.35395	0	0	0	0	MAB21L4	protein_coding
287	ENSECAG00000011475	55.9712	1.26583	0.483806	2.61641	0.00888607	0.434595	13.9953	120.059	79.4705	131.628	51.3874	21.6631	17.7062	53.2648	40.1304	30.4068	ZNF703	protein_coding
288	ENSECAG00000020639	84.5368	0.724514	0.276915	2.61637	0.00888692	0.434595	129.457	80.4279	87.7734	122.55	107.555	48.7421	67.0307	47.9383	93.0803	60.8135	GLIS2	protein_coding
289	ENSECAG00000001389	81.3213	0.685077	0.263173	2.60314	0.00923736	0.43889	89.8033	128.218	86.5873	106.664	92.0193	60.9276	37.9419	66.581	76.3593	68.1112	SMG5	protein_coding
290	ENSECAG00000007317	681.652	-0.473307	0.181726	-2.6045	0.00920077	0.43889	433.855	811.273	595.436	504.952	506.704	862.464	925.782	777	670.512	728.546	NBL1	protein_coding
291	ENSECAG00000019895	3.88253	3.08714	1.18601	2.60296	0.00924214	0.43889	1.16628	4.66249	8.30289	7.94306	13.1456	0	0	0.66581	1.11473	1.82441	LRRC32	protein_coding
292	ENSECAG00000023444	758.668	-0.60054	0.230202	-2.60876	0.00908721	0.43889	342.885	704.036	702.187	483.392	780.372	1126.48	1172.4	891.52	655.463	727.938	EPHX2	protein_coding
293	ENSECAG00000024048	64.2377	-0.853913	0.328416	-2.6001	0.00931968	0.43889	36.1546	45.4593	49.8173	44.2542	52.5825	62.2815	135.326	45.2751	89.7361	81.4901	TIPARP	protein_coding
294	ENSECAG00000030329	71.3417	-0.889865	0.341979	-2.6021	0.00926541	0.43889	55.9813	27.9749	55.748	62.4098	46.6072	97.4841	159.356	71.2417	82.4903	54.1241	STON1	protein_coding
295	ENSECAG00000045173	2.60958	5.09958	1.96161	2.59969	0.00933067	0.43889	4.66511	0	10.6751	0	10.7555	0	0	0	0	0	0	lncRNA
296	ENSECAG00000046714	2.60611	5.09776	1.95598	2.60625	0.00915394	0.43889	0	6.99373	7.11676	0	11.9506	0	0	0	0	0	0	lncRNA
297	ENSECAG00000050431	3.46843	-4.99833	1.91405	-2.61138	0.00901768	0.43889	0	0	0	0	0	4.06184	21.5004	0	0	9.12203	0	protein_coding
298	ENSECAG00000053454	3.35244	4.82413	1.85613	2.59903	0.00934869	0.43889	0	0	4.74451	1.13472	26.2912	1.35395	0	0	0	0	0	lncRNA
299	ENSECAG00000057798	2.23919	4.87909	1.87346	2.60432	0.00920556	0.43889	3.49883	0	14.2335	2.26945	2.39011	0	0	0	0	0	0	lncRNA
300	ENSECAG00000059982	5.70648	2.91362	1.11778	2.6066	0.00914461	0.43889	8.16394	6.99373	8.30289	10.2125	15.5357	4.06184	3.79419	0	0	0	0	lncRNA
301	ENSECAG00000016390	195.297	-0.532915	0.205248	-2.59644	0.00941953	0.440747	144.618	205.149	149.452	164.535	132.651	289.744	239.034	175.108	204.554	248.119	NDRG3	protein_coding
302	ENSECAG00000000751	91.2334	-0.894756	0.34684	-2.57974	0.00988747	0.441154	95.6347	80.4279	41.5144	45.3889	54.9726	121.855	192.239	111.856	53.5072	114.938	NEDD4L	protein_coding
303	ENSECAG00000001129	603.22	-0.638998	0.246473	-2.59257	0.00952613	0.441154	585.471	750.661	473.265	282.546	266.498	846.216	686.748	787.653	673.857	679.287	HMOX1	protein_coding
304	ENSECAG00000015911	179.184	0.491005	0.190258	2.58073	0.00985904	0.441154	243.752	220.303	182.664	199.711	201.964	144.872	132.797	123.175	184.488	158.115	COPS7A	protein_coding
305	ENSECAG00000017587	251.327	-0.619161	0.239946	-2.58042	0.00986789	0.441154	249.583	268.093	147.08	191.768	132.651	431.909	297.212	277.643	229.078	288.256	ZRANB1	protein_coding
306	ENSECAG00000020037	30.6558	1.53095	0.592016	2.58599	0.00971	0.441154	86.3045	44.2936	55.748	21.5597	21.511	5.41578	3.79419	21.9717	36.2288	9.73017	CTSO	protein_coding
307	ENSECAG00000020767	2.46593	4.36105	1.68279	2.59156	0.00955408	0.441154	3.49883	0	3.55838	9.07778	7.17034	1.35395	0	0	0	0	IL7	protein_coding
308	ENSECAG00000023404	17.081	-1.62163	0.628416	-2.58051	0.00986543	0.441154	16.3279	10.4906	2.37225	11.3472	1.19506	23.0171	32.883	38.617	14.4915	20.0685	LRRC75B	protein_coding
309	ENSECAG00000024558	187.036	-0.630254	0.244344	-2.57937	0.0098981	0.441154	108.464	141.04	137.591	165.67	179.258	285.683	289.623	166.453	146.03	250.552	0	protein_coding
310	ENSECAG00000024730	86.8882	0.70625	0.272946	2.58751	0.00966727	0.441154	162.112	90.9185	71.1676	123.685	90.8243	60.9276	69.5602	69.9101	57.4088	72.3681	ICMT	protein_coding
311	ENSECAG00000040224	3.0117	4.6657	1.80438	2.58577	0.00971626	0.441154	6.99766	0	4.74451	17.0208	0	1.35395	0	0	0	0	0	lncRNA
312	ENSECAG00000044102	2.94523	4.63451	1.7906	2.58825	0.0096466	0.441154	0	0	9.48902	7.94306	10.7555	0	1.26473	0	0	0	0	lncRNA
313	ENSECAG00000049839	10.6254	2.79826	1.07905	2.59326	0.0095071	0.441154	13.9953	8.15935	45.0728	14.7514	9.56045	12.1855	2.52946	0	0	0	0	lncRNA
314	ENSECAG00000054375	3.2011	4.05337	1.56652	2.58751	0.0096673	0.441154	0	4.66249	16.6058	4.53889	3.58517	1.35395	1.26473	0	0	0	0	lncRNA
315	ENSECAG00000057257	2.44524	4.34949	1.6843	2.58237	0.00981243	0.441154	4.66511	4.66249	3.55838	10.2125	0	1.35395	0	0	0	0	0	lncRNA
316	ENSECAG00000058225	4.14589	4.43747	1.71936	2.58088	0.00985492	0.441154	0	0	18.978	10.2125	9.56045	2.70789	0	0	0	0	0	lncRNA
317	ENSECAG00000019677	82.0708	-0.886946	0.344356	-2.57566	0.0100048	0.443336	41.986	48.9561	80.6566	38.5806	76.4836	131.333	175.797	61.9203	78.0314	86.9634	EPHX1	protein_coding
318	ENSECAG00000020574	136.503	-0.724578	0.281456	-2.5744	0.0100415	0.443336	55.9813	92.0841	75.9121	164.535	125.481	182.783	185.915	199.077	154.948	128.317	MBNL2	protein_coding
319	ENSECAG00000055509	2.55631	3.75877	1.4597	2.57503	0.0100232	0.443336	3.49883	3.49687	8.30289	2.26945	5.97528	1.35395	0	0.66581	0	0	0	protein_coding
320	ENSECAG00000023082	210.874	0.593423	0.23088	2.57026	0.0101622	0.445872	353.382	186.5	246.714	263.256	221.085	143.518	113.826	214.391	167.21	198.86	HACD3	protein_coding
321	ENSECAG00000048729	2.59942	5.0943	1.98123	2.57128	0.0101324	0.445872	0	0	15.4197	3.40417	7.17034	0	0	0	0	0	0	lncRNA
322	ENSECAG00000059264	5.11479	3.89467	1.51609	2.56889	0.0102025	0.446247	2.33255	0	11.8613	5.67361	27.4863	0	3.79419	0	0	0	0	lncRNA
323	ENSECAG00000023776	24.4264	-1.44885	0.564343	-2.56731	0.010249	0.446894	4.66511	17.4843	15.4197	23.8292	3.58517	36.5565	67.0307	17.9769	33.9994	23.7173	TTK	protein_coding
324	ENSECAG00000021383	92.8651	-1.06465	0.415009	-2.56536	0.010307	0.448037	44.3185	53.6186	83.0289	71.4875	46.6072	135.395	266.858	72.5733	36.7862	117.978	EFNA1	protein_coding
325	ENSECAG00000021387	2.95399	-4.80013	1.87192	-2.56428	0.0103389	0.448041	0	0	0	0	0	0	0	9.32134	11.7047	8.5139	MYOM3	protein_coding
326	ENSECAG00000056352	2.60883	4.44555	1.73503	2.56223	0.0104002	0.449316	2.33255	8.15935	13.0474	0	1.19506	1.35395	0	0	0	0	0	lncRNA
327	ENSECAG00000059657	570.29	-0.404999	0.158456	-2.55591	0.0105911	0.456163	447.85	519.867	444.798	468.641	570.042	675.619	818.28	525.324	649.89	582.594	SLC5A3	protein_coding
328	ENSECAG00000010554	907.428	0.387035	0.151493	2.55481	0.0106245	0.456207	1239.75	1091.02	946.529	970.188	898.682	667.495	680.425	796.309	825.46	958.421	MSMO1	protein_coding
329	ENSECAG00000027675	110.017	1.23527	0.483748	2.55353	0.0106636	0.456491	307.897	27.9749	182.664	221.271	32.2665	62.2815	73.3543	62.5861	76.3593	53.5159	MT-ND4	protein_coding
330	ENSECAG00000059870	4.17112	4.45257	1.74457	2.55225	0.0107031	0.456795	0	0	8.30289	26.0986	4.78022	0	2.52946	0	0	0	0	lncRNA
331	ENSECAG00000019747	62.0471	-0.846785	0.332157	-2.54935	0.0107923	0.457432	36.1546	20.9812	54.5618	52.1973	57.3627	81.2368	96.1195	101.203	64.0972	56.5566	ETV3	protein_coding
332	ENSECAG00000021642	2.89556	-4.10691	1.6114	-2.54866	0.0108137	0.457432	0	0	1.18613	0	0	12.1855	0	7.32391	2.78683	5.47322	DYRK3	protein_coding
333	ENSECAG00000059532	2.66332	4.4799	1.75779	2.54861	0.0108155	0.457432	1.16628	0	2.37225	18.1556	3.58517	1.35395	0	0	0	0	0	lncRNA
334	ENSECAG00000050027	2.57907	5.08361	1.99559	2.54742	0.0108523	0.457618	0	0	2.37225	9.07778	14.3407	0	0	0	0	0	0	lncRNA
335	ENSECAG00000005659	77.3944	0.729727	0.286847	2.54396	0.0109605	0.460799	114.295	95.581	79.4705	86.2389	109.945	36.5565	43.0008	55.2622	69.6709	83.9227	TPST1	protein_coding
336	ENSECAG00000007296	5.21005	3.34393	1.31548	2.54198	0.0110227	0.462033	2.33255	3.49687	11.8613	1.13472	28.6813	0	1.26473	3.32905	0	0	PPP1R3F	protein_coding
337	ENSECAG00000011630	34.45	-0.991275	0.391102	-2.53457	0.0112585	0.469128	15.1616	12.8218	26.0948	30.6375	29.8764	60.9276	54.3834	40.6144	42.3599	31.623	FBXO5	protein_coding
338	ENSECAG00000012530	10.1495	2.87718	1.13481	2.53539	0.0112324	0.469128	0	5.82811	37.9561	14.7514	31.0715	2.70789	0	0.66581	0	8.5139	LSAMP	protein_coding
339	ENSECAG00000002222	70.0575	-0.711622	0.281628	-2.52682	0.0115101	0.474884	40.8197	72.2686	67.6092	48.7931	35.8517	82.5907	98.6489	97.2083	81.3756	75.4088	ZBTB6	protein_coding
340	ENSECAG00000007338	21.7026	1.2681	0.502055	2.52583	0.0115425	0.474884	25.6581	26.8093	29.6532	30.6375	41.827	8.12368	6.32365	9.98715	10.0326	27.9742	SCARF2	protein_coding
341	ENSECAG00000012098	23.422	-1.81289	0.717354	-2.52719	0.0114979	0.474884	6.99766	1.16562	23.7225	10.2125	9.56045	37.9105	68.2954	61.2545	7.80314	7.29763	RASSF10	protein_coding
342	ENSECAG00000053433	25.2234	-1.26323	0.500262	-2.52514	0.0115653	0.474884	9.33021	15.1531	15.4197	19.2903	14.3407	48.7421	50.5892	34.6221	9.47524	35.2719	0	protein_coding
343	ENSECAG00000056220	2.44996	5.00993	1.98279	2.5267	0.0115138	0.474884	0	0	7.11676	10.2125	7.17034	0	0	0	0	0	0	lncRNA
344	ENSECAG00000058094	11.0637	3.05026	1.20896	2.52305	0.0116342	0.476325	1.16628	1.16562	51.0035	19.2903	25.0962	4.06184	8.85311	0	0	0	0	lncRNA
345	ENSECAG00000014989	305.842	0.450259	0.178611	2.52089	0.0117059	0.477872	405.864	291.406	393.794	367.65	309.52	239.648	221.328	271.651	328.289	229.267	TMEM87A	protein_coding
346	ENSECAG00000018476	285.017	-0.813652	0.323276	-2.51689	0.0118395	0.481928	125.958	159.69	155.383	324.531	266.498	510.438	469.215	175.774	202.324	460.359	TPX2	protein_coding
347	ENSECAG00000018101	51.2477	0.950027	0.377835	2.5144	0.0119236	0.483609	34.9883	53.6186	47.4451	77.1612	124.286	36.5565	37.9419	23.3034	40.6878	36.4881	FBLN1	protein_coding
348	ENSECAG00000048257	2.34019	4.28691	1.70546	2.51363	0.0119494	0.483609	2.33255	5.82811	8.30289	5.67361	0	0	1.26473	0	0	0	0	lncRNA
349	ENSECAG00000000271	2.47056	5.02131	1.99919	2.51167	0.0120162	0.48385	3.49883	8.15935	13.0474	0	0	0	0	0	0	0	APBA1	protein_coding
350	ENSECAG00000011290	49.8666	-1.06235	0.423596	-2.50793	0.012144	0.48385	58.3138	22.1468	41.5144	10.2125	28.6813	93.4223	80.9427	53.2648	39.0157	71.1518	PPP1R14A	protein_coding
351	ENSECAG00000023538	4.82975	3.44092	1.37229	2.50742	0.0121615	0.48385	0	4.66249	14.2335	7.94306	16.7308	4.06184	0	0.66581	0	0	ENOX1	protein_coding
352	ENSECAG00000029603	48.2622	-0.985756	0.392562	-2.51109	0.0120361	0.48385	37.3209	55.9499	35.5838	18.1556	14.3407	77.1749	79.678	45.9409	47.9336	70.5437	H1-4	protein_coding
353	ENSECAG00000053713	2.37412	4.30152	1.71386	2.50985	0.0120783	0.48385	0	4.66249	10.6751	2.26945	4.78022	1.35395	0	0	0	0	0	lncRNA
354	ENSECAG00000057816	3.41502	4.14334	1.65204	2.50801	0.0121414	0.48385	1.16628	0	9.48902	13.6167	7.17034	2.70789	0	0	0	0	0	lncRNA
355	ENSECAG00000020148	159.103	0.530996	0.212068	2.50389	0.0122837	0.487333	211.096	203.984	139.963	155.457	231.841	117.793	107.502	135.159	153.833	134.398	SGCB	protein_coding
356	ENSECAG00000001667	12.5477	-1.48848	0.595525	-2.49944	0.0124389	0.490653	6.99766	3.49687	9.48902	3.40417	9.56045	21.6631	18.971	9.98715	20.6226	21.2847	DEPDC7	protein_coding
357	ENSECAG00000003007	32.1735	1.0201	0.408407	2.49774	0.0124987	0.490653	34.9883	30.3062	47.4451	44.2542	59.7528	21.6631	7.58838	21.9717	23.9668	29.7986	ZNF391	protein_coding
358	ENSECAG00000020164	160.193	-0.592593	0.23708	-2.49955	0.0124351	0.490653	124.792	151.531	163.686	103.26	94.4094	167.889	269.387	207.067	153.276	166.629	GAB2	protein_coding
359	ENSECAG00000056098	2.7143	3.80264	1.52257	2.49752	0.0125067	0.490653	3.49883	2.33124	4.74451	5.67361	8.36539	0	2.52946	0	0	0	0	lncRNA
360	ENSECAG00000008465	247.745	-0.45031	0.180566	-2.49388	0.0126354	0.494324	227.424	217.971	182.664	240.561	176.868	291.098	323.771	322.918	222.947	271.228	STRBP	protein_coding
361	ENSECAG00000013366	503.537	-0.476236	0.191065	-2.49253	0.0126838	0.494844	394.201	403.305	423.447	359.707	522.24	754.148	677.895	503.352	396.845	600.23	MACF1	protein_coding
362	ENSECAG00000045714	7.49098	2.9963	1.20298	2.49072	0.0127485	0.495994	5.83138	12.8218	23.7225	15.8861	7.17034	9.47762	0	0	0	0	GPR4	protein_coding
363	ENSECAG00000005662	147.264	0.61357	0.246731	2.4868	0.0128897	0.49702	230.923	153.862	187.408	206.52	112.335	138.102	83.4722	103.866	145.473	110.681	QDPR	protein_coding
364	ENSECAG00000006539	157.437	0.523508	0.210841	2.48295	0.0130298	0.49702	184.272	146.868	220.62	169.074	209.135	140.81	92.3253	119.18	151.604	140.479	EXOSC7	protein_coding
365	ENSECAG00000012834	2.59492	4.43813	1.78745	2.48294	0.0130302	0.49702	17.4941	0	1.18613	1.13472	4.78022	1.35395	0	0	0	0	METTL25B	protein_coding
366	ENSECAG00000015714	161.614	-0.618901	0.249035	-2.48519	0.0129481	0.49702	71.1429	114.231	186.222	141.84	124.286	190.906	178.327	247.681	197.308	164.197	RIT1	protein_coding
367	ENSECAG00000023244	75.8205	0.692132	0.278662	2.48377	0.0130001	0.49702	109.63	88.5873	74.726	90.7778	106.36	51.45	41.7361	47.2725	61.3104	86.3552	TAF1B	protein_coding
368	ENSECAG00000050474	6.49253	2.77529	1.11707	2.48445	0.0129753	0.49702	13.9953	1.16562	20.1642	1.13472	20.316	1.35395	1.26473	0.66581	0	4.86508	0	lncRNA
369	ENSECAG00000055125	3.2189	4.05491	1.63359	2.48221	0.0130572	0.49702	1.16628	1.16562	24.9087	1.13472	1.19506	1.35395	1.26473	0	0	0	0	lncRNA
370	ENSECAG00000056705	2.1467	4.14608	1.6691	2.48402	0.0129909	0.49702	3.49883	1.16562	3.55838	1.13472	10.7555	1.35395	0	0	0	0	0	lncRNA
371	ENSECAG00000000532	8.04097	-2.54759	1.02776	-2.47876	0.0131838	0.49758	6.99766	0	4.74451	0	0	9.47762	22.7651	3.99486	24.5241	7.90576	EPS8L1	protein_coding
372	ENSECAG00000006931	27.8776	-1.03365	0.417718	-2.47451	0.013342	0.49758	25.6581	22.1468	15.4197	17.0208	10.7555	37.9105	50.5892	38.617	21.7373	38.9207	ATF4	protein_coding
373	ENSECAG00000007920	191.015	0.507917	0.2053	2.47402	0.0133601	0.49758	244.918	230.793	246.714	216.732	182.844	189.552	116.355	132.496	199.537	150.209	ATXN7L3	protein_coding
374	ENSECAG00000009843	8.67754	-2.84383	1.14645	-2.48056	0.0131175	0.49758	1.16628	1.16562	4.74451	0	3.58517	21.6631	1.26473	31.2931	0	21.8929	0	protein_coding
375	ENSECAG00000012007	3.34307	4.11127	1.66302	2.47217	0.0134296	0.49758	0	1.16562	22.5364	1.13472	5.97528	1.35395	1.26473	0	0	0	0	protein_coding
376	ENSECAG00000016756	63.4183	-0.861216	0.347338	-2.47948	0.0131576	0.49758	38.4871	37.2999	55.748	31.7722	60.9479	101.546	110.032	43.9435	54.0646	100.342	GPM6A	protein_coding
377	ENSECAG00000016856	3.19614	4.04466	1.63374	2.47571	0.0132972	0.49758	1.16628	0	18.978	6.80834	2.39011	1.35395	1.26473	0	0	0	SLC7A2	protein_coding
378	ENSECAG00000017148	110.335	-0.7156	0.289669	-2.47041	0.0134958	0.49758	48.9836	73.4342	94.8902	98.7209	100.385	121.855	215.004	140.486	89.1787	120.411	FNIP1	protein_coding
379	ENSECAG00000022714	2.83204	-4.0734	1.64765	-2.47224	0.0134268	0.49758	0	0	0	1.13472	0	4.06184	10.1178	7.98972	5.0163	0	TNFSF9	protein_coding
380	ENSECAG00000031550	2.80804	4.55882	1.84498	2.47093	0.0134764	0.49758	17.4941	5.82811	0	3.40417	0	1.35395	0	0	0	0	U2	snRNA
381	ENSECAG00000039346	2.36173	4.29432	1.73405	2.47646	0.0132691	0.49758	6.99766	5.82811	8.30289	1.13472	0	1.35395	0	0	0	0	0	lncRNA
382	ENSECAG00000059277	2.13437	4.8093	1.94638	2.47089	0.0134776	0.49758	1.16628	0	2.37225	2.26945	15.5357	0	0	0	0	0	0	lncRNA
383	ENSECAG00000000508	30.9058	-1.05988	0.430051	-2.46455	0.0137184	0.49925	17.4941	12.8218	28.467	21.5597	19.1209	56.8657	54.3834	27.2982	21.1799	49.8671	0	protein_coding
384	ENSECAG00000005515	23.9779	1.93068	0.783099	2.46544	0.0136845	0.49925	6.99766	23.3124	131.66	20.425	8.36539	5.41578	3.79419	2.66324	12.8194	24.3254	GCNT4	protein_coding
385	ENSECAG00000016520	77.2253	0.626686	0.25424	2.46494	0.0137038	0.49925	83.9719	109.568	103.193	98.7209	72.8984	54.1578	69.5602	75.2365	49.6057	55.3403	ZHX3	protein_coding
386	ENSECAG00000030386	631.091	-0.456613	0.185181	-2.46576	0.0136721	0.49925	374.375	455.758	653.556	571.9	604.698	794.766	633.63	896.18	584.121	741.925	ZKSCAN1	protein_coding
387	ENSECAG00000056739	59.6291	0.785091	0.31821	2.46721	0.0136169	0.49925	73.4754	64.1092	42.7006	96.4514	101.58	33.8487	39.2066	56.5939	38.4583	49.8671	0	lncRNA
388	ENSECAG00000016407	2.33664	4.94149	2.00619	2.46312	0.0137733	0.499956	6.99766	0	0	6.80834	9.56045	0	0	0	0	0	KCNB2	protein_coding
389	ENSECAG00000004967	2.49823	5.0365	2.05231	2.45406	0.0141252	0.50345	0	0	7.11676	1.13472	16.7308	0	0	0	0	0	GJA9	protein_coding
390	ENSECAG00000012776	582.447	-0.442308	0.180069	-2.45633	0.0140365	0.50345	514.328	614.283	481.568	451.62	405.124	620.107	943.489	622.532	605.858	565.566	RLF	protein_coding
391	ENSECAG00000014357	4.92242	3.80663	1.55175	2.45312	0.0141621	0.50345	1.16628	0	9.48902	1.13472	33.4616	2.70789	1.26473	0	0	0	DLL1	protein_coding
392	ENSECAG00000017827	51.5922	-0.818419	0.333724	-2.45239	0.0141913	0.50345	48.9836	43.128	28.467	38.5806	27.4863	41.9723	91.0606	65.2494	50.7204	80.2739	ANTXR2	protein_coding
393	ENSECAG00000019392	2.60928	5.09959	2.07736	2.45483	0.014095	0.50345	1.16628	0	22.5364	0	2.39011	0	0	0	0	0	BLOC1S1	protein_coding
394	ENSECAG00000023399	294.996	-0.502813	0.204763	-2.45559	0.0140653	0.50345	250.749	171.346	278.74	327.935	192.404	312.762	333.889	378.846	410.779	292.513	GADD45G	protein_coding
395	ENSECAG00000042430	2.69793	4.49787	1.82953	2.45848	0.0139526	0.50345	0	0	8.30289	11.3472	5.97528	1.35395	0	0	0	0	0	lncRNA
396	ENSECAG00000045728	2.70061	4.49927	1.83437	2.45276	0.0141764	0.50345	0	0	4.74451	11.3472	9.56045	1.35395	0	0	0	0	0	lncRNA
397	ENSECAG00000055097	11.7648	2.70758	1.10108	2.45903	0.0139313	0.50345	2.33255	6.99373	40.3283	26.0986	25.0962	5.41578	11.3826	0	0	0	0	lncRNA
398	ENSECAG00000033032	15.5771	-7.17965	2.93171	-2.44896	0.0143268	0.505712	0	0	0	0	0	0	0	33.2905	50.7204	71.76	0	pseudogene
399	ENSECAG00000050926	2.34989	4.94918	2.02065	2.44931	0.0143132	0.505712	3.49883	9.32498	10.6751	0	0	0	0	0	0	0	0	protein_coding
400	ENSECAG00000024288	2.87085	4.59014	1.87839	2.44365	0.0145396	0.511938	0	0	9.48902	1.13472	16.7308	1.35395	0	0	0	0	SLC27A2	protein_coding
401	ENSECAG00000057923	2.37708	4.96478	2.03352	2.44147	0.0146274	0.513747	0	2.33124	9.48902	0	11.9506	0	0	0	0	0	0	lncRNA
402	ENSECAG00000009152	147.648	-0.767412	0.314535	-2.43983	0.0146943	0.514813	102.632	139.875	125.729	40.85	136.236	230.171	237.769	211.062	115.932	136.222	PLA2G1B	protein_coding
403	ENSECAG00000056331	4.52394	3.68745	1.51238	2.43818	0.0147615	0.515884	3.49883	0	10.6751	9.07778	17.9258	4.06184	0	0	0	0	0	protein_coding
404	ENSECAG00000009168	34.192	-1.45284	0.596891	-2.43401	0.0149325	0.519283	44.3185	18.65	16.6058	4.53889	7.17034	101.546	13.912	65.2494	40.1304	29.7986	GADD45B	protein_coding
405	ENSECAG00000015619	320.587	0.843729	0.346534	2.43476	0.0149015	0.519283	254.248	876.548	204.014	417.578	307.129	215.277	166.944	287.63	129.866	346.637	TMEM50B	protein_coding
406	ENSECAG00000022724	104.989	-0.833271	0.342539	-2.43263	0.0149895	0.519981	40.8197	97.9123	118.613	63.5445	57.3627	89.3604	132.797	121.177	234.651	93.6529	CYP26B1	protein_coding
407	ENSECAG00000021133	727.798	0.428794	0.176375	2.43115	0.0150511	0.520835	868.876	800.782	718.793	1015.58	775.591	594.382	408.508	650.496	693.922	751.047	FDFT1	protein_coding
408	ENSECAG00000001927	2.84069	-4.74236	1.95501	-2.42575	0.0152767	0.521261	0	0	0	0	0	0	0	2.66324	4.45894	21.2847	DPY19L2	protein_coding
409	ENSECAG00000014876	50.1394	-1.09298	0.450623	-2.42549	0.0152876	0.521261	52.4824	20.9812	22.5364	27.2333	37.0467	75.821	31.6183	145.147	36.2288	52.2996	POLK	protein_coding
410	ENSECAG00000015613	91.5369	-0.707418	0.291441	-2.42732	0.015211	0.521261	44.3185	97.9123	96.0763	54.4667	54.9726	105.608	120.149	101.869	89.1787	150.818	SCUBE3	protein_coding
411	ENSECAG00000022690	573.271	0.476738	0.196448	2.42678	0.0152334	0.521261	955.181	653.914	604.925	574.17	549.726	490.128	341.477	440.1	522.253	600.838	ODC1	protein_coding
412	ENSECAG00000038584	5262.42	-0.360559	0.148619	-2.42607	0.0152633	0.521261	4564.81	5119.41	4635.38	4193.94	4523.29	6341.88	7869.15	4960.28	5562.52	4853.53	TMSB10	protein_coding
413	ENSECAG00000048472	14.1933	-1.34305	0.553221	-2.42768	0.0151956	0.521261	6.99766	6.99373	9.48902	6.80834	9.56045	28.4329	21.5004	24.635	18.3931	9.12203	0	lncRNA
414	ENSECAG00000057760	3.34831	4.11804	1.69839	2.42467	0.0153225	0.521261	0	3.49687	2.37225	22.6945	2.39011	0	2.52946	0	0	0	0	lncRNA
415	ENSECAG00000001634	71.8886	0.723868	0.300551	2.40847	0.0160197	0.521461	93.3021	123.556	109.124	69.2181	53.7775	36.5565	54.3834	65.9152	54.0646	58.9891	INSYN1	protein_coding
416	ENSECAG00000002652	29.5926	1.06662	0.441405	2.41641	0.0156744	0.521461	64.1452	25.6437	48.6312	28.3681	34.6566	16.2474	8.85311	24.635	16.1636	28.5824	0	protein_coding
417	ENSECAG00000005987	48.0492	-0.862464	0.35829	-2.40717	0.0160766	0.521461	23.3255	40.7968	40.3283	47.6584	17.9258	77.1749	61.9718	51.2674	77.474	42.5695	IRF2BP1	protein_coding
418	ENSECAG00000009379	134.088	-0.732769	0.304298	-2.40806	0.0160374	0.521461	111.963	127.053	79.4705	71.4875	112.335	186.845	255.475	97.8741	95.8671	202.509	GLCCI1	protein_coding
419	ENSECAG00000010035	424.428	-0.41928	0.174267	-2.40596	0.0161302	0.521461	485.171	321.712	278.74	323.396	406.319	544.286	456.568	498.026	478.221	451.845	SCUBE2	protein_coding
420	ENSECAG00000010808	92.5322	-0.731013	0.301665	-2.42327	0.0153817	0.521461	94.4684	80.4279	74.726	71.4875	27.4863	96.1302	99.9137	107.195	135.44	138.047	DNAJB4	protein_coding
421	ENSECAG00000010882	113.992	0.637665	0.264427	2.4115	0.0158873	0.521461	162.112	139.875	139.963	128.224	126.676	77.1749	49.3245	82.5604	134.883	99.1261	PYCR2	protein_coding
422	ENSECAG00000011931	214.552	0.537043	0.222559	2.41303	0.0158204	0.521461	215.761	318.215	173.175	279.142	285.618	166.535	136.591	201.075	224.061	145.344	IDH1	protein_coding
423	ENSECAG00000014953	102.177	-0.820705	0.33931	-2.41875	0.0155741	0.521461	37.3209	71.1029	59.3064	96.4514	103.97	146.226	196.033	155.134	80.8182	75.4088	KIF15	protein_coding
424	ENSECAG00000021628	2.48827	3.76542	1.56066	2.41271	0.0158343	0.521461	3.49883	6.99373	3.55838	1.13472	8.36539	0	0	1.33162	0	0	TTLL10	protein_coding
425	ENSECAG00000022019	558.356	-0.363554	0.150241	-2.4198	0.015529	0.521461	431.522	546.677	480.381	442.542	540.165	541.578	768.956	581.918	593.038	656.786	EIF3H	protein_coding
426	ENSECAG00000024265	438.225	0.382609	0.158712	2.41072	0.0159211	0.521461	431.522	490.727	555.107	481.122	524.63	366.919	292.153	462.072	391.829	386.166	B4GALT2	protein_coding
427	ENSECAG00000025009	55.9436	-0.849426	0.352905	-2.40696	0.0160861	0.521461	34.9883	46.6249	43.8867	21.5597	51.3874	117.793	79.678	47.2725	59.0809	57.1647	NFKBIL1	protein_coding
428	ENSECAG00000027677	588.614	-0.653436	0.270682	-2.41404	0.0157767	0.521461	241.419	596.799	566.969	413.039	468.462	671.557	996.607	999.381	391.272	540.632	MT-ND6	protein_coding
429	ENSECAG00000029574	2.94476	5.2747	2.18577	2.4132	0.0158131	0.521461	0	0	24.9087	4.53889	0	0	0	0	0	0	MDFIC2	protein_coding
430	ENSECAG00000045236	5.94863	3.61025	1.49972	2.40728	0.0160718	0.521461	0	0	20.1642	9.07778	25.0962	1.35395	3.79419	0	0	0	0	lncRNA
431	ENSECAG00000047864	3.35125	4.11082	1.70715	2.40799	0.0160405	0.521461	4.66511	0	8.30289	0	17.9258	1.35395	1.26473	0	0	0	0	lncRNA
432	ENSECAG00000050006	3.56531	3.3769	1.40373	2.40567	0.0161429	0.521461	4.66511	4.66249	10.6751	6.80834	4.78022	4.06184	0	0	0	0	0	lncRNA
433	ENSECAG00000053305	3.06795	3.97488	1.65151	2.40682	0.0160919	0.521461	3.49883	0	10.6751	10.2125	3.58517	2.70789	0	0	0	0	0	lncRNA
434	ENSECAG00000054437	2.59139	4.43618	1.8412	2.4094	0.015979	0.521461	0	0	7.11676	9.07778	8.36539	1.35395	0	0	0	0	0	lncRNA
435	ENSECAG00000055402	3.42084	-4.34677	1.79463	-2.4221	0.0154312	0.521461	0	0	0	0	1.19506	21.6631	0	4.66067	0	6.68949	0	lncRNA
436	ENSECAG00000059693	2.853	4.58576	1.90259	2.41027	0.0159406	0.521461	0	0	21.3503	1.13472	4.78022	0	1.26473	0	0	0	0	lncRNA
437	ENSECAG00000054794	250.077	-0.463287	0.192759	-2.40345	0.0162413	0.523437	159.78	276.252	168.43	243.965	201.964	289.744	323.771	304.941	262.52	269.404	IER5	protein_coding
438	ENSECAG00000032438	51.1419	-1.06208	0.442228	-2.40166	0.0163208	0.524801	37.3209	22.1468	27.2809	36.3111	41.827	67.6973	125.208	65.9152	71.9003	15.8115	PTPRS	protein_coding
439	ENSECAG00000000544	6.41631	-3.66322	1.52608	-2.40041	0.0163769	0.525217	2.33255	0	1.18613	1.13472	0	1.35395	41.7361	0	0	16.4197	HECW2	protein_coding
440	ENSECAG00000008098	102.96	0.579167	0.241781	2.39542	0.0166011	0.525217	131.789	155.028	134.032	115.742	81.2638	62.2815	88.5311	82.5604	91.4082	86.9634	TCF7	protein_coding
441	ENSECAG00000008381	87.4552	-0.76607	0.319947	-2.39437	0.0166491	0.525217	41.986	76.9311	65.237	79.4306	58.5577	140.81	168.209	57.9255	100.326	85.139	NR2F2	protein_coding
442	ENSECAG00000009073	13.9876	-1.83149	0.76506	-2.39392	0.0166694	0.525217	11.6628	11.6562	1.18613	0	5.97528	16.2474	48.0597	17.9769	9.47524	17.6359	ARHGEF39	protein_coding
443	ENSECAG00000009749	33.4821	1.09863	0.458461	2.39635	0.0165593	0.525217	48.9836	36.1343	55.748	38.5806	50.1924	17.6013	10.1178	7.98972	38.4583	31.0149	SLC35D2	protein_coding
444	ENSECAG00000010604	12.517	-6.86453	2.86497	-2.39602	0.016574	0.525217	0	0	0	0	0	0	0	33.9563	40.1304	51.0834	EGR4	protein_coding
445	ENSECAG00000014536	62.3879	-0.989663	0.412936	-2.39665	0.0165458	0.525217	26.8244	29.1406	36.7699	56.7361	58.5577	85.2986	154.297	29.9615	89.7361	56.5566	KIF23	protein_coding
446	ENSECAG00000016339	62.8349	-1.28971	0.537516	-2.39939	0.0164226	0.525217	15.1616	16.3187	74.726	37.4459	38.2418	112.378	155.562	52.599	113.145	12.7708	ADAMTS1	protein_coding
447	ENSECAG00000034550	5.27342	-2.70955	1.13116	-2.39537	0.0166037	0.525217	0	3.49687	0	3.40417	0	16.2474	6.32365	14.6478	5.57367	3.04068	0	protein_coding
448	ENSECAG00000007703	335.633	0.377266	0.157946	2.38858	0.0169137	0.525384	309.063	340.362	419.889	439.138	389.588	262.666	285.829	292.291	324.388	293.121	SS18	protein_coding
449	ENSECAG00000008550	71.1488	-0.702366	0.294034	-2.38872	0.0169071	0.525384	66.4778	51.2874	52.1896	59.0056	40.6319	100.192	111.296	104.532	53.5072	72.3681	WBP11	protein_coding
450	ENSECAG00000011396	575.486	-0.399438	0.166966	-2.39233	0.0167419	0.525384	430.356	659.742	495.801	393.749	503.119	609.276	617.188	695.106	589.137	761.386	TOX2	protein_coding
451	ENSECAG00000016485	4.563	-3.09877	1.29691	-2.38935	0.016878	0.525384	0	0	4.74451	0	0	8.12368	17.7062	5.32648	6.6884	3.04068	ABLIM2	protein_coding
452	ENSECAG00000023527	55.1303	-0.85933	0.359839	-2.3881	0.0169358	0.525384	30.3232	58.2811	29.6532	44.2542	32.2665	83.9447	103.708	74.5707	59.6383	34.6637	PHF19	protein_coding
453	ENSECAG00000032188	402.488	0.440891	0.184487	2.38981	0.016857	0.525384	410.529	466.249	491.057	519.703	432.61	354.734	230.181	317.591	346.125	456.102	0	protein_coding
454	ENSECAG00000051773	2.37156	4.96167	2.07507	2.39109	0.0167985	0.525384	0	6.99373	1.18613	0	15.5357	0	0	0	0	0	0	lncRNA
455	ENSECAG00000018515	53.6261	0.733857	0.307497	2.38655	0.0170072	0.526439	71.1429	75.7654	54.5618	65.8139	69.3133	37.9105	21.5004	46.6067	40.1304	53.5159	PCCB	protein_coding
456	ENSECAG00000019989	982.953	0.391371	0.164194	2.38358	0.017145	0.528496	1417.03	1116.67	1046.16	1023.52	977.556	693.22	734.808	1057.31	791.461	971.8	SNRPG	protein_coding
457	ENSECAG00000050723	7.01937	2.72406	1.14288	2.3835	0.0171487	0.528496	11.6628	2.33124	21.3503	10.2125	14.3407	2.70789	7.58838	0	0	0	0	protein_coding
458	ENSECAG00000008827	29.9926	-1.57757	0.662404	-2.38158	0.0172385	0.530104	5.83138	25.6437	14.2335	13.6167	15.5357	56.8657	89.7958	25.3008	51.2778	1.82441	NDC80	protein_coding
459	ENSECAG00000005563	117.415	0.78672	0.330846	2.3779	0.0174114	0.530784	135.288	106.072	275.181	82.8348	145.797	56.8657	69.5602	78.5656	91.4082	132.574	PRSS23	protein_coding
460	ENSECAG00000005685	164.996	0.929634	0.390905	2.37816	0.0173993	0.530784	229.756	460.421	97.2624	200.846	94.4094	82.5907	120.149	65.9152	193.406	105.207	RDH10	protein_coding
461	ENSECAG00000006915	133.305	-0.673503	0.283081	-2.37919	0.0173506	0.530784	148.117	108.403	86.5873	98.7209	71.7034	224.755	94.8548	206.401	122.621	170.886	STK17A	protein_coding
462	ENSECAG00000014040	59.5135	-0.863883	0.363033	-2.37963	0.0173303	0.530784	25.6581	48.9561	36.7699	23.8292	75.2885	78.5289	108.767	73.2391	73.0151	51.0834	SIAE	protein_coding
463	ENSECAG00000002212	442.428	-0.601528	0.253452	-2.37334	0.0176281	0.533451	237.92	384.655	429.378	323.396	380.028	739.255	627.306	516.669	240.783	544.889	FOXO1	protein_coding
464	ENSECAG00000012128	4.02127	2.62135	1.10403	2.37435	0.0175797	0.533451	4.66511	3.49687	9.48902	9.07778	7.17034	1.35395	3.79419	0	0.557367	0.608135	CD86	protein_coding
465	ENSECAG00000017796	177.45	-0.618548	0.260793	-2.37179	0.017702	0.533451	103.799	153.862	154.197	166.804	119.506	180.075	364.242	205.069	176.128	150.818	NCAPD2	protein_coding
466	ENSECAG00000018599	582.493	0.502751	0.212016	2.37129	0.0177261	0.533451	811.729	632.933	692.698	685.373	596.333	308.7	414.831	384.838	703.954	593.54	ATP5PB	protein_coding
467	ENSECAG00000026912	60.8621	-0.881058	0.371139	-2.37393	0.0175998	0.533451	41.986	51.2874	55.748	41.9847	22.7061	60.9276	126.473	62.5861	104.785	40.1369	CENPH	protein_coding
468	ENSECAG00000043954	2.25229	4.88717	2.06068	2.37163	0.0177098	0.533451	0	0	8.30289	2.26945	11.9506	0	0	0	0	0	0	lncRNA
469	ENSECAG00000024999	341.337	-0.414765	0.174993	-2.37019	0.0177791	0.533903	244.918	280.915	303.649	322.261	311.91	375.043	357.919	504.018	307.109	405.626	SMC5	protein_coding
470	ENSECAG00000021223	4.33724	-2.70587	1.1422	-2.369	0.017836	0.53441	3.49883	1.16562	0	1.13472	0	6.76973	2.52946	9.32134	5.57367	13.379	EIF4A2	protein_coding
471	ENSECAG00000023170	2.29342	4.29465	1.81342	2.36826	0.0178719	0.53441	0	12.8218	7.11676	1.13472	1.19506	0	0	0.66581	0	0	STAT4	protein_coding
472	ENSECAG00000055460	2.23697	4.87794	2.06189	2.36576	0.017993	0.536892	0	10.4906	9.48902	0	2.39011	0	0	0	0	0	0	processed_pseudogene
473	ENSECAG00000050247	5.8373	3.52551	1.49075	2.36493	0.0180333	0.536959	0	1.16562	24.9087	11.3472	15.5357	5.41578	0	0	0	0	0	lncRNA
474	ENSECAG00000008799	154.858	-0.554977	0.234983	-2.36177	0.0181878	0.539277	192.436	106.072	91.3318	99.8556	137.431	162.474	211.21	195.082	180.587	172.102	ENPP4	protein_coding
475	ENSECAG00000019073	1074.24	0.30243	0.128028	2.36223	0.0181656	0.539277	1254.91	1047.89	1290.51	1140.4	1201.03	953.178	822.075	1092.59	916.311	1023.49	0	protein_coding
476	ENSECAG00000059470	2.99266	3.93641	1.66908	2.35843	0.0183524	0.543015	1.16628	0	11.8613	1.13472	13.1456	1.35395	1.26473	0	0	0	0	protein_coding
477	ENSECAG00000037184	47.544	0.973457	0.413009	2.35699	0.0184238	0.543985	102.632	40.7968	29.6532	52.1973	89.6292	48.7421	15.1768	31.2931	30.6552	34.6637	TUBG2	protein_coding
478	ENSECAG00000009827	2.47127	3.646	1.54851	2.35453	0.0185464	0.544181	1.16628	6.99373	5.93064	6.80834	1.19506	1.35395	1.26473	0	0	0	CHMP5	protein_coding
479	ENSECAG00000015626	2.87854	-3.43785	1.45931	-2.3558	0.0184831	0.544181	1.16628	0	0	0	1.19506	12.1855	3.79419	5.32648	3.90157	1.21627	BHMT	protein_coding
480	ENSECAG00000047588	2.21944	4.86726	2.06654	2.35527	0.0185093	0.544181	0	0	11.8613	7.94306	2.39011	0	0	0	0	0	0	lncRNA
481	ENSECAG00000058600	6.69675	6.46035	2.746	2.35264	0.0186407	0.545811	0	0	16.6058	19.2903	31.0715	0	0	0	0	0	0	lncRNA
482	ENSECAG00000020784	52.1313	0.857889	0.364784	2.35177	0.0186842	0.545952	46.6511	44.2936	65.237	127.089	52.5825	32.4947	43.0008	38.617	44.5894	26.758	SLC66A3	protein_coding
483	ENSECAG00000015418	81.542	-0.778382	0.331854	-2.34556	0.0189988	0.553285	106.131	45.4593	45.0728	70.3528	32.2665	131.333	123.944	75.9023	99.2113	85.7471	NR5A2	protein_coding
484	ENSECAG00000021972	200.974	0.46116	0.196699	2.34449	0.0190531	0.553285	313.728	183.003	212.317	241.696	215.11	144.872	156.827	193.751	180.587	167.845	SLC39A11	protein_coding
485	ENSECAG00000036554	3.53695	3.20154	1.3653	2.34494	0.01903	0.553285	22.1593	1.16562	5.93064	1.13472	1.19506	1.35395	1.26473	0	0.557367	0.608135	0	pseudogene
486	ENSECAG00000057894	2.84849	5.22633	2.23025	2.34338	0.0191097	0.553787	0	0	26.0948	0	2.39011	0	0	0	0	0	0	lncRNA
487	ENSECAG00000047101	5.07021	3.35808	1.43568	2.33902	0.0193346	0.556867	0	2.33124	23.7225	17.0208	2.39011	2.70789	2.52946	0	0	0	0	protein_coding
488	ENSECAG00000053342	2.6154	3.73036	1.59471	2.3392	0.0193249	0.556867	4.66511	8.15935	5.93064	0	4.78022	1.35395	1.26473	0	0	0	0	lncRNA
489	ENSECAG00000057789	8.37238	2.62748	1.12325	2.33917	0.0193267	0.556867	15.1616	5.82811	8.30289	24.9639	16.7308	1.35395	11.3826	0	0	0	0	protein_coding
490	ENSECAG00000006638	139.257	-0.528723	0.226138	-2.33805	0.0193844	0.557164	100.3	88.5873	135.218	157.726	87.2391	189.552	169.474	157.797	158.292	148.385	CASP8AP2	protein_coding
491	ENSECAG00000010238	40.7063	-1.15541	0.494872	-2.33476	0.0195561	0.559199	46.6511	23.3124	21.3503	10.2125	23.9011	96.1302	63.2365	75.9023	25.0815	21.2847	CECR2	protein_coding
492	ENSECAG00000019062	7.61725	-2.14818	0.920223	-2.33441	0.0195744	0.559199	4.66511	1.16562	5.93064	1.13472	1.19506	17.6013	1.26473	13.3162	5.57367	24.3254	RAB5A	protein_coding
493	ENSECAG00000044601	2.25832	4.89085	2.09448	2.33512	0.0195371	0.559199	0	0	8.30289	1.13472	13.1456	0	0	0	0	0	0	lncRNA
494	ENSECAG00000017202	862.682	-0.364131	0.15609	-2.33283	0.0196569	0.56008	832.721	796.12	710.49	667.217	761.251	1092.63	1239.44	894.183	802.051	830.713	SNX5	protein_coding
495	ENSECAG00000020463	2896.38	-1.05684	0.453129	-2.3323	0.0196847	0.56008	3720.42	1760.09	1582.29	1588.61	751.69	4313.67	1336.82	5387.07	4185.27	4337.83	HSPB1	protein_coding
496	ENSECAG00000007805	9.18261	-2.4566	1.05467	-2.32925	0.0198458	0.560137	1.16628	1.16562	9.48902	1.13472	1.19506	23.0171	12.6473	0	6.13104	35.88	CCDC141	protein_coding
497	ENSECAG00000017469	159.731	-0.64723	0.277687	-2.33079	0.0197646	0.560137	72.3091	144.537	132.846	149.783	120.701	293.806	239.034	131.83	134.883	177.576	SPC24	protein_coding
498	ENSECAG00000020465	410.401	-0.746446	0.320439	-2.32945	0.0198355	0.560137	388.37	153.862	339.232	408.5	243.791	559.18	156.827	667.807	521.138	665.3	FKBP4	protein_coding
499	ENSECAG00000022893	186.659	-0.536953	0.230511	-2.3294	0.0198379	0.560137	191.269	180.671	103.193	137.301	146.992	250.48	297.212	199.077	189.505	170.886	MAN2A1	protein_coding
500	ENSECAG00000047221	2.67155	5.13508	2.20579	2.32799	0.0199125	0.560584	0	0	14.2335	12.482	0	0	0	0	0	0	0	lncRNA
501	ENSECAG00000060202	3.08683	4.70064	2.01965	2.32745	0.0199412	0.560584	0	0	0	6.80834	22.7061	1.35395	0	0	0	0	0	lncRNA
502	ENSECAG00000015838	859.362	-0.385554	0.165764	-2.32593	0.0200223	0.561741	727.757	810.107	727.096	888.488	571.237	1095.34	933.371	1197.13	842.181	800.914	ST13	protein_coding
503	ENSECAG00000001318	232.65	-0.494216	0.212737	-2.32313	0.020172	0.56392	242.586	207.481	135.218	175.882	203.16	282.975	337.683	277.643	188.39	275.485	UBL3	protein_coding
504	ENSECAG00000019441	666.949	0.342186	0.147305	2.32298	0.0201801	0.56392	600.632	852.07	779.285	785.228	712.253	626.877	489.451	629.856	546.777	647.056	LDLRAP1	protein_coding
505	ENSECAG00000000026	8.85553	2.21747	0.95518	2.32152	0.020259	0.565004	0	18.65	16.6058	20.425	17.9258	1.35395	0	1.33162	5.57367	6.68949	XG	protein_coding
506	ENSECAG00000014211	71.4048	0.760494	0.327965	2.31882	0.0204045	0.56794	96.801	85.0904	84.215	89.6431	95.6045	41.9723	29.0888	41.946	99.2113	50.4752	AGK	protein_coding
507	ENSECAG00000012921	2.34719	-4.43078	1.9127	-2.31651	0.0205307	0.570323	0	0	0	0	0	14.8934	0	1.33162	0.557367	6.68949	ALPK2	protein_coding
508	ENSECAG00000047936	2.70753	5.15355	2.22548	2.31571	0.0205743	0.57041	0	0	22.5364	4.53889	0	0	0	0	0	0	0	lncRNA
509	ENSECAG00000012373	4.64353	2.57653	1.11342	2.31407	0.0206636	0.570738	12.829	5.82811	7.11676	11.3472	2.39011	1.35395	2.52946	0	0	3.04068	PLEKHG6	protein_coding
510	ENSECAG00000031994	2.49563	3.65182	1.57813	2.31401	0.0206672	0.570738	3.49883	8.15935	5.93064	2.26945	2.39011	2.70789	0	0	0	0	ELP5	protein_coding
511	ENSECAG00000004666	7.52748	2.00038	0.865407	2.31149	0.0208055	0.572315	5.83138	6.99373	29.6532	12.482	5.97528	1.35395	0	5.99229	3.3442	3.64881	BDH1	protein_coding
512	ENSECAG00000005262	2.12745	4.80515	2.07835	2.31201	0.0207773	0.572315	0	5.82811	11.8613	0	3.58517	0	0	0	0	0	0	pseudogene
513	ENSECAG00000024086	507.513	0.333351	0.144304	2.31006	0.0208849	0.573378	640.286	539.683	563.41	560.553	528.215	412.954	416.096	396.157	536.744	481.035	PSMA1	protein_coding
514	ENSECAG00000014340	30.7877	0.946056	0.409924	2.30788	0.0210056	0.574106	43.1522	32.6374	29.6532	27.2333	70.5083	18.9552	18.971	21.9717	28.9831	15.8115	ADAL	protein_coding
515	ENSECAG00000023008	111.63	0.526918	0.22847	2.30629	0.0210943	0.574106	152.782	115.397	129.288	132.763	131.456	70.4052	72.0896	112.522	112.031	87.5715	RIMS2	protein_coding
516	ENSECAG00000023300	372.714	-0.45507	0.197238	-2.30721	0.0210433	0.574106	213.429	251.774	326.185	339.282	440.976	431.909	461.626	476.72	385.698	399.545	TMF1	protein_coding
517	ENSECAG00000029185	762.362	-0.349618	0.151618	-2.30592	0.0211152	0.574106	634.454	580.48	629.833	672.891	831.759	953.178	967.518	877.538	760.806	715.167	CHD2	protein_coding
518	ENSECAG00000046484	4.48814	3.63258	1.57386	2.30807	0.0209952	0.574106	1.16628	0	17.7919	15.8861	5.97528	4.06184	0	0	0	0	0	lncRNA
519	ENSECAG00000021144	3.55084	2.52137	1.095	2.30262	0.0213003	0.577652	8.16394	4.66249	4.74451	5.67361	7.17034	0	1.26473	2.66324	0.557367	0.608135	KLK1	protein_coding
520	ENSECAG00000034304	3.11951	3.9916	1.73387	2.30213	0.0213277	0.577652	1.16628	0	5.93064	2.26945	19.1209	2.70789	0	0	0	0	0	lncRNA
521	ENSECAG00000005641	431.764	0.499859	0.217947	2.29349	0.0218196	0.577691	291.569	452.261	565.783	688.777	532.995	307.346	285.829	437.437	403.534	352.11	C7H11orf87	protein_coding
522	ENSECAG00000009443	55.8849	-0.898363	0.390504	-2.30052	0.0214186	0.577691	45.4848	32.6374	56.9341	36.3111	22.7061	75.821	125.208	68.5784	30.0978	65.0705	MAP3K21	protein_coding
523	ENSECAG00000009663	201.187	-0.583563	0.254491	-2.29306	0.0218445	0.577691	109.63	264.596	124.543	131.628	174.478	280.267	227.651	179.769	227.406	291.905	CDH2	protein_coding
524	ENSECAG00000011463	49.9487	0.888799	0.387038	2.29641	0.0216523	0.577691	40.8197	111.9	60.4925	71.4875	40.6319	32.4947	22.7651	39.9486	54.622	24.3254	CCSER1	protein_coding
525	ENSECAG00000013781	8.75451	-2.39452	1.04439	-2.29275	0.0218624	0.577691	4.66511	1.16562	2.37225	1.13472	4.78022	2.70789	10.1178	33.2905	27.311	0	CRACD	protein_coding
526	ENSECAG00000015656	64.736	-0.82883	0.361107	-2.29524	0.0217191	0.577691	23.3255	64.1092	72.3537	31.7722	40.6319	93.4223	125.208	73.9049	55.7367	66.8949	IQCC	protein_coding
527	ENSECAG00000017520	193.98	-0.852636	0.370923	-2.29869	0.0215227	0.577691	68.8103	166.684	144.707	119.146	190.014	421.077	416.096	106.53	130.981	175.751	PLXDC2	protein_coding
528	ENSECAG00000019125	563.971	0.415998	0.181243	2.29525	0.0217188	0.577691	677.607	824.095	517.151	579.843	628.599	440.032	349.065	491.368	591.924	540.024	FASN	protein_coding
529	ENSECAG00000023554	247.141	-0.417227	0.181736	-2.29579	0.021688	0.577691	170.276	160.856	246.714	222.406	258.132	273.497	290.888	287.63	270.323	290.689	EMID1	protein_coding
530	ENSECAG00000027676	4055.42	-0.390846	0.170236	-2.2959	0.0216814	0.577691	3245.75	4146.12	3137.31	4336.91	2678.12	4677.88	5911.35	4787.17	3843.04	3790.51	0	Mt_rRNA
531	ENSECAG00000035269	5.26081	-2.97567	1.29379	-2.29997	0.02145	0.577691	2.33255	1.16562	1.18613	0	1.19506	28.4329	1.26473	5.32648	11.7047	0	0	lncRNA
532	ENSECAG00000043996	2.99728	4.65546	2.02646	2.29734	0.0215996	0.577691	0	0	8.30289	0	20.316	1.35395	0	0	0	0	0	lncRNA
533	ENSECAG00000052882	50.1595	3.756	1.63691	2.29458	0.0217574	0.577691	0	6.99373	320.254	129.358	10.7555	1.35395	0	8.65553	1.11473	23.1091	0	protein_coding
534	ENSECAG00000013772	26.5355	-0.909231	0.396773	-2.29157	0.0219307	0.578247	17.4941	11.6562	17.7919	20.425	25.0962	27.0789	35.4124	41.2802	28.9831	40.1369	MDFIC	protein_coding
535	ENSECAG00000017396	7.21198	-2.35313	1.02714	-2.29096	0.0219655	0.578247	4.66511	0	5.93064	1.13472	0	6.76973	29.0888	5.32648	16.1636	3.04068	STING1	protein_coding
536	ENSECAG00000009303	423.224	0.417889	0.1826	2.28855	0.0221056	0.579767	409.363	594.467	437.681	393.749	586.773	281.621	400.919	366.196	426.386	335.083	GFPT2	protein_coding
537	ENSECAG00000016282	29.3333	1.10119	0.481147	2.28868	0.0220977	0.579767	33.822	29.1406	39.1422	41.9847	54.9726	16.2474	34.1477	8.65553	7.24577	27.9742	NAALADL2	protein_coding
538	ENSECAG00000009278	23.327	-1.59837	0.699082	-2.28639	0.0222314	0.581251	0	18.65	13.0474	6.80834	19.1209	29.7868	82.2075	9.98715	38.4583	15.2034	SPOCK2	protein_coding
539	ENSECAG00000054645	6.79152	3.112	1.36123	2.28616	0.0222447	0.581251	20.993	0	33.2116	2.26945	3.58517	4.06184	3.79419	0	0	0	0	protein_coding
540	ENSECAG00000046981	2.12726	4.80503	2.10316	2.28468	0.0223319	0.582448	0	4.66249	0	2.26945	14.3407	0	0	0	0	0	0	lncRNA
541	ENSECAG00000050770	5.14374	3.79573	1.66238	2.2833	0.0224125	0.583471	0	0	16.6058	5.67361	25.0962	4.06184	0	0	0	0	0	lncRNA
542	ENSECAG00000006229	21.8833	-1.45798	0.639561	-2.27966	0.0226277	0.586903	1.16628	13.9875	1.18613	23.8292	17.9258	37.9105	46.795	25.9666	24.5241	25.5417	PIMREG	protein_coding
543	ENSECAG00000007426	290.78	-0.536318	0.235216	-2.28011	0.0226012	0.586903	216.927	240.118	285.857	239.427	201.964	445.448	450.244	207.067	382.354	238.389	SNX2	protein_coding
544	ENSECAG00000008836	251.137	0.746848	0.328073	2.27647	0.0228178	0.590747	667.11	235.456	281.112	212.193	178.063	231.525	122.679	140.486	180.03	262.715	PYCR1	protein_coding
545	ENSECAG00000007382	108.97	0.490158	0.215659	2.27284	0.0230359	0.590961	122.459	123.556	119.799	152.053	119.506	69.0512	103.708	81.8946	99.7687	97.9098	CIBAR1	protein_coding
546	ENSECAG00000016355	101.017	0.593413	0.261016	2.27347	0.0229976	0.590961	149.283	159.69	112.682	108.933	78.8737	64.9894	64.5012	82.5604	98.6539	90.004	ZNF584	protein_coding
547	ENSECAG00000022412	37.0498	0.872555	0.383509	2.27519	0.0228945	0.590961	54.815	51.2874	30.8393	30.6375	72.8984	21.6631	21.5004	23.9692	23.9668	38.9207	EMG1	protein_coding
548	ENSECAG00000025099	6.18966	-2.28413	1.00406	-2.27489	0.0229128	0.590961	3.49883	1.16562	1.18613	4.53889	0	23.0171	6.32365	1.99743	5.57367	14.5953	TUBB1	protein_coding
549	ENSECAG00000046493	3.35967	-4.94673	2.17548	-2.27386	0.0229744	0.590961	0	0	0	0	0	10.8316	22.7651	0	0	0	GBP5	protein_coding
550	ENSECAG00000011294	2.35412	4.2898	1.88845	2.2716	0.0231107	0.591801	0	8.15935	9.48902	4.53889	0	1.35395	0	0	0	0	SAXO1	protein_coding
551	ENSECAG00000012289	7.05013	-2.92264	1.28841	-2.26841	0.0233045	0.592639	2.33255	3.49687	0	1.13472	1.19506	0	39.2066	7.32391	0	15.8115	ZSCAN29	protein_coding
552	ENSECAG00000015381	895.409	-0.469136	0.206725	-2.26937	0.0232458	0.592639	597.134	673.73	617.972	743.243	1120.96	1397.27	1115.49	905.502	744.085	1038.7	RIN2	protein_coding
553	ENSECAG00000019876	2.33287	4.28238	1.88794	2.26829	0.0233117	0.592639	0	9.32498	5.93064	6.80834	0	0	1.26473	0	0	0	ATP23	protein_coding
554	ENSECAG00000042521	2.70046	3.7766	1.66468	2.26867	0.0232885	0.592639	1.16628	0	2.37225	12.482	8.36539	1.35395	1.26473	0	0	0	0	lncRNA
555	ENSECAG00000047930	15.3779	-2.15456	0.950623	-2.26647	0.0234225	0.594384	9.33021	1.16562	9.48902	6.80834	1.19506	58.2197	27.8241	35.2879	4.45894	0	0	lncRNA
556	ENSECAG00000008975	33.1494	1.04188	0.460615	2.26194	0.023701	0.599939	64.1452	50.1217	18.978	34.0417	57.3627	13.5395	10.1178	21.9717	22.2947	38.9207	PPM1H	protein_coding
557	ENSECAG00000059984	11.6064	1.76406	0.780029	2.26153	0.0237266	0.599939	43.1522	16.3187	5.93064	15.8861	8.36539	0	11.3826	2.66324	4.45894	7.90576	H2BC5	protein_coding
558	ENSECAG00000011703	4.24072	2.83499	1.25514	2.2587	0.023902	0.601887	11.6628	6.99373	14.2335	1.13472	2.39011	4.06184	1.26473	0.66581	0	0	STYK1	protein_coding
559	ENSECAG00000019451	43.6644	0.766609	0.339429	2.25852	0.023913	0.601887	41.986	45.4593	54.5618	74.8917	59.7528	24.371	22.7651	29.2956	44.032	39.5288	RASSF5	protein_coding
560	ENSECAG00000045538	2.45714	4.35584	1.92888	2.25822	0.0239319	0.601887	0	0	10.6751	11.3472	1.19506	1.35395	0	0	0	0	0	lncRNA
561	ENSECAG00000059332	23.1078	-1.35528	0.600801	-2.25579	0.024084	0.604633	12.829	8.15935	13.0474	13.6167	16.7308	50.096	58.1776	9.32134	41.8025	7.29763	0	lncRNA
562	ENSECAG00000020875	189.902	0.582791	0.258859	2.25138	0.0243613	0.610506	109.63	250.609	270.437	201.981	304.739	199.03	144.179	149.141	148.26	121.019	RUNX2	protein_coding
563	ENSECAG00000041174	7.15208	2.50568	1.11358	2.2501	0.0244424	0.611451	18.6604	5.82811	17.7919	11.3472	5.97528	8.12368	3.79419	0	0	0	0	lncRNA
564	ENSECAG00000013918	43.5642	-0.883357	0.392731	-2.24927	0.0244955	0.611694	41.986	16.3187	28.467	27.2333	38.2418	98.8381	49.3245	36.6196	39.0157	59.5973	ZFYVE16	protein_coding
565	ENSECAG00000006816	10.3154	1.65206	0.735703	2.24555	0.0247326	0.613553	17.4941	15.1531	13.0474	27.2333	5.97528	5.41578	0	3.32905	10.0326	5.47322	0	protein_coding
566	ENSECAG00000007152	60.3319	-1.0949	0.487542	-2.24575	0.0247202	0.613553	44.3185	29.1406	22.5364	28.3681	66.9231	131.333	154.297	35.9537	68.5561	21.8929	TAP2	protein_coding
567	ENSECAG00000007908	63.3733	0.710548	0.31645	2.24537	0.0247443	0.613553	111.963	68.7717	59.3064	94.182	60.9479	27.0789	44.2656	47.2725	58.5235	61.4217	MIPEP	protein_coding
568	ENSECAG00000022100	17.5579	-1.50313	0.669083	-2.24655	0.0246689	0.613553	18.6604	11.6562	4.74451	6.80834	3.58517	23.0171	53.1187	21.3059	28.4257	4.25695	DHRS7B	protein_coding
569	ENSECAG00000046473	3.56174	3.32767	1.48262	2.24445	0.0248034	0.613939	9.33021	1.16562	11.8613	6.80834	2.39011	4.06184	0	0	0	0	OR2AG2	protein_coding
570	ENSECAG00000000625	83.9636	-0.797255	0.355628	-2.24182	0.0249729	0.615969	43.1522	47.7905	46.259	80.5653	87.2391	151.642	161.885	91.8818	50.163	79.0576	LRCH2	protein_coding
571	ENSECAG00000022166	2009.4	-0.457439	0.204046	-2.24184	0.0249714	0.615969	1293.4	2080.64	1680.74	1475.14	1933.6	3124.91	3068.24	1933.51	1611.35	1892.52	AKAP12	protein_coding
572	ENSECAG00000015959	27.9657	-1.17483	0.524905	-2.23817	0.0252099	0.616573	1.16628	26.8093	21.3503	19.2903	16.7308	52.8039	53.1187	29.9615	32.8846	25.5417	MYBL1	protein_coding
573	ENSECAG00000016546	7.02782	1.87244	0.836584	2.23819	0.0252085	0.616573	6.99766	6.99373	15.4197	18.1556	8.36539	1.35395	0	6.6581	3.90157	2.43254	GALNT12	protein_coding
574	ENSECAG00000017689	309.926	-0.392054	0.175049	-2.23969	0.0251112	0.616573	232.089	297.234	268.065	268.929	271.278	368.273	457.832	298.283	287.601	349.678	ARHGEF28	protein_coding
575	ENSECAG00000023247	2.25836	4.23058	1.88824	2.2405	0.0250587	0.616573	1.16628	1.16562	17.7919	0	1.19506	0	1.26473	0	0	0	GRIN2B	protein_coding
576	ENSECAG00000057847	9.09722	2.66456	1.19056	2.23807	0.0252163	0.616573	5.83138	10.4906	24.9087	15.8861	20.316	13.5395	0	0	0	0	0	lncRNA
577	ENSECAG00000045074	2.50426	5.04011	2.2528	2.23726	0.025269	0.616792	0	0	7.11676	0	17.9258	0	0	0	0	0	0	lncRNA
578	ENSECAG00000009494	75.1513	0.680555	0.304803	2.23277	0.0255641	0.621973	110.796	67.6061	103.193	85.1042	97.9946	39.2644	50.5892	37.9512	83.605	75.4088	IFT80	protein_coding
579	ENSECAG00000024742	67.6794	0.664925	0.297903	2.23202	0.0256138	0.621973	113.129	74.5998	86.5873	77.1612	65.7281	29.7868	45.5303	54.5964	58.5235	71.1518	PFN2	protein_coding
580	ENSECAG00000057872	3.97828	2.76651	1.2392	2.23249	0.0255824	0.621973	13.9953	10.4906	3.55838	2.26945	3.58517	4.06184	1.26473	0	0.557367	0	0	lncRNA
581	ENSECAG00000006511	10.0307	2.24722	1.00781	2.2298	0.0257607	0.622567	0	34.9687	9.48902	26.0986	13.1456	0	0	3.32905	7.80314	5.47322	MCHR1	protein_coding
582	ENSECAG00000010685	816.156	-0.324874	0.145645	-2.23059	0.0257086	0.622567	637.953	643.423	760.307	780.689	797.102	1041.18	1059.84	808.959	829.362	802.739	RSF1	protein_coding
583	ENSECAG00000026549	3.44517	3.28066	1.47138	2.22965	0.0257709	0.622567	8.16394	12.8218	4.74451	2.26945	2.39011	4.06184	0	0	0	0	U6	snRNA
584	ENSECAG00000001652	1107.9	-0.371973	0.167055	-2.22665	0.0259706	0.623867	951.682	990.779	864.687	836.291	1183.11	1205.01	1726.36	1137.2	1154.31	1029.57	ITGA6	protein_coding
585	ENSECAG00000009794	80.5248	0.625139	0.280735	2.22679	0.0259612	0.623867	116.628	68.7717	119.799	106.664	77.6786	51.45	61.9718	47.2725	67.4414	87.5715	0	protein_coding
586	ENSECAG00000018272	546.705	0.389149	0.174805	2.22618	0.0260018	0.623867	520.159	773.973	597.808	695.585	515.069	475.235	342.742	504.018	519.466	522.996	LAP3	protein_coding
587	ENSECAG00000057128	13.3747	-2.05273	0.921571	-2.22743	0.0259186	0.623867	1.16628	3.49687	10.6751	5.67361	4.78022	58.2197	8.85311	22.6375	0	18.2441	0	lncRNA
588	ENSECAG00000021521	98.2394	-0.607119	0.27293	-2.22445	0.026118	0.625589	71.1429	62.9436	93.704	69.2181	90.8243	135.395	160.621	127.17	101.441	69.9356	ATF7	protein_coding
589	ENSECAG00000011085	36.1069	-0.878368	0.395004	-2.22369	0.0261691	0.625747	17.4941	24.4781	39.1422	15.8861	29.8764	39.2644	68.2954	57.2597	32.8846	36.4881	GPR180	protein_coding
590	ENSECAG00000021111	396.373	0.382305	0.172144	2.22084	0.0263616	0.628217	531.822	435.943	323.813	452.754	500.728	299.222	323.771	374.851	398.517	322.312	PDCD6	protein_coding
591	ENSECAG00000024475	151.175	0.547025	0.246304	2.22094	0.0263551	0.628217	116.628	236.621	166.058	190.633	187.624	158.412	79.678	138.488	128.752	108.856	CRTC3	protein_coding
592	ENSECAG00000051014	71.4395	0.749802	0.337803	2.21964	0.026443	0.629093	32.6557	99.0779	88.9595	130.493	95.6045	64.9894	60.707	54.5964	42.9173	44.3939	0	lncRNA
593	ENSECAG00000059671	8.75919	2.33292	1.05155	2.21855	0.0265174	0.629799	10.4965	9.32498	11.8613	2.26945	39.4369	4.06184	0	0.66581	9.47524	0	0	lncRNA
594	ENSECAG00000007369	112.869	-0.797923	0.359843	-2.21742	0.0265945	0.630568	48.9836	79.2623	109.124	83.9695	89.6292	161.12	239.034	101.203	168.325	48.0427	KDM3A	protein_coding
595	ENSECAG00000015934	9.2234	1.97153	0.889687	2.21598	0.0266931	0.63113	5.83138	12.8218	16.6058	7.94306	31.0715	1.35395	0	3.32905	1.11473	12.1627	MAMDC2	protein_coding
596	ENSECAG00000022289	151.192	-0.79227	0.357666	-2.21511	0.0267527	0.63113	118.96	144.537	126.916	29.5028	132.651	200.384	309.859	138.488	201.767	108.856	TMPRSS2	protein_coding
597	ENSECAG00000032794	2.73688	3.78713	1.70956	2.21526	0.0267422	0.63113	11.6628	0	3.55838	2.26945	7.17034	2.70789	0	0	0	0	CLEC12A	protein_coding
598	ENSECAG00000047461	2.42918	4.99816	2.2584	2.21314	0.0268877	0.633255	0	0	10.6751	13.6167	0	0	0	0	0	0	0	lncRNA
599	ENSECAG00000015757	789.872	-0.332307	0.150404	-2.20943	0.0271451	0.635068	584.305	796.12	686.768	608.211	822.199	842.154	827.133	1062.63	809.297	859.903	RPL26	protein_coding
600	ENSECAG00000020022	239.574	0.44536	0.201533	2.20986	0.0271152	0.635068	270.576	280.915	206.386	321.127	304.739	204.446	137.856	205.069	253.602	211.023	INSIG1	protein_coding
601	ENSECAG00000057906	2.47031	5.02129	2.27227	2.20982	0.027118	0.635068	0	0	20.1642	4.53889	0	0	0	0	0	0	0	protein_coding
602	ENSECAG00000057982	5.848	3.14194	1.42098	2.21111	0.0270279	0.635068	5.83138	0	16.6058	11.3472	17.9258	6.76973	0	0	0	0	0	lncRNA
603	ENSECAG00000024179	739.972	0.472646	0.214034	2.20827	0.0272252	0.635887	1082.3	670.233	791.147	961.11	799.493	446.802	443.92	946.116	603.628	654.962	EBNA1BP2	protein_coding
604	ENSECAG00000032748	38.8799	0.845083	0.382938	2.20684	0.0273252	0.637166	52.4824	72.2686	21.3503	64.6792	39.4369	27.0789	22.7651	24.635	30.6552	33.4474	NOL12	protein_coding
605	ENSECAG00000010789	164.277	-0.589018	0.267259	-2.20392	0.02753	0.639753	148.117	151.531	116.24	124.82	113.53	190.906	312.388	145.812	112.588	226.835	AKIRIN2	protein_coding
606	ENSECAG00000018994	85.1893	0.612583	0.278028	2.20332	0.0275724	0.639753	72.3091	141.04	126.916	85.1042	90.8243	48.7421	72.0896	58.5913	86.9492	69.3274	TEDC2	protein_coding
607	ENSECAG00000033164	5.27273	-2.65932	1.20676	-2.20368	0.0275471	0.639753	1.16628	0	0	0	5.97528	21.6631	10.1178	1.99743	3.90157	7.90576	0	protein_coding
608	ENSECAG00000004240	5.08968	-2.90489	1.32125	-2.19859	0.027907	0.64297	1.16628	1.16562	0	0	3.58517	12.1855	25.2946	0	4.45894	3.04068	SLC2A9	protein_coding
609	ENSECAG00000009093	173.985	0.412414	0.187587	2.19852	0.0279118	0.64297	208.764	203.984	192.153	207.654	184.039	129.979	113.826	173.111	169.44	156.899	GLYR1	protein_coding
610	ENSECAG00000013433	40.9809	0.772105	0.351254	2.19814	0.0279393	0.64297	36.1546	39.6312	74.726	54.4667	54.9726	21.6631	22.7651	31.2931	33.9994	40.1369	MAPK7	protein_coding
611	ENSECAG00000016968	78.1243	-0.795404	0.361706	-2.19903	0.0278755	0.64297	39.6534	34.9687	94.8902	68.0834	46.6072	146.226	130.267	101.869	59.0809	59.5973	ZNF652	protein_coding
612	ENSECAG00000055962	5.52115	3.41751	1.55413	2.19898	0.0278792	0.64297	3.49883	0	33.2116	1.13472	11.9506	5.41578	0	0	0	0	0	lncRNA
613	ENSECAG00000043994	77.6868	-0.65162	0.296629	-2.19675	0.028038	0.643138	72.3091	40.7968	67.6092	65.8139	53.7775	138.102	115.09	85.8895	66.3267	71.1518	0	lncRNA
614	ENSECAG00000045918	2.32386	3.59873	1.638	2.19703	0.0280184	0.643138	2.33255	0	7.11676	3.40417	8.36539	1.35395	0	0.66581	0	0	0	lncRNA
615	ENSECAG00000013520	18.0019	1.78982	0.815851	2.19381	0.0282493	0.643364	4.66511	2.33124	93.704	24.9639	14.3407	5.41578	5.05892	13.982	2.78683	12.7708	ATP13A4	protein_coding
616	ENSECAG00000014517	105.003	-0.928156	0.423267	-2.19284	0.0283191	0.643364	16.3279	41.9624	54.5618	120.281	127.871	140.81	225.122	104.532	97.5392	121.019	CDCA3	protein_coding
617	ENSECAG00000022425	2.56215	-3.91405	1.78547	-2.19216	0.0283676	0.643364	0	0	0	0	1.19506	2.70789	12.6473	0	0.557367	8.5139	0	protein_coding
618	ENSECAG00000023851	860.152	-0.341678	0.15568	-2.19475	0.0281816	0.643364	604.131	627.105	897.898	771.612	891.512	992.442	1099.05	908.165	956.999	852.606	SCAF11	protein_coding
619	ENSECAG00000037070	2.27257	4.23397	1.93018	2.19356	0.0282673	0.643364	0	2.33124	10.6751	0	8.36539	1.35395	0	0	0	0	0	lncRNA
620	ENSECAG00000039852	24.9052	-1.68971	0.770589	-2.19275	0.0283252	0.643364	10.4965	12.8218	16.6058	9.07778	9.56045	70.4052	60.707	46.6067	0	12.7708	ARHGEF18	protein_coding
621	ENSECAG00000054390	2.3717	3.57029	1.62861	2.19223	0.0283629	0.643364	0	4.66249	7.11676	4.53889	4.78022	1.35395	1.26473	0	0	0	0	lncRNA
622	ENSECAG00000006659	318.412	-0.429254	0.196353	-2.18613	0.0288059	0.644096	257.747	210.978	351.094	265.525	271.278	477.943	261.799	362.866	353.928	370.963	ATG4B	protein_coding
623	ENSECAG00000007541	343.849	0.451784	0.206353	2.18937	0.0285698	0.644096	297.401	320.546	511.221	423.252	435	193.614	354.124	298.283	280.913	324.136	ERGIC1	protein_coding
624	ENSECAG00000015331	213.086	0.405224	0.185467	2.18488	0.0288975	0.644096	281.073	229.628	211.131	200.846	290.399	211.216	174.533	168.45	161.079	202.509	FARP1	protein_coding
625	ENSECAG00000017894	77.3243	-0.996379	0.455816	-2.18592	0.0288213	0.644096	29.1569	19.8156	47.4451	95.3167	65.7281	124.563	160.621	65.9152	134.883	29.7986	CKAP2	protein_coding
626	ENSECAG00000018314	411.974	0.471151	0.215251	2.18884	0.0286082	0.644096	538.82	589.805	485.126	366.515	414.684	245.064	393.331	259.666	491.04	335.691	TIMP3	protein_coding
627	ENSECAG00000019880	134.579	0.716459	0.327927	2.18481	0.0289029	0.644096	79.3068	263.431	154.197	169.074	172.088	102.9	50.5892	143.815	133.768	76.6251	ADAMTS9	protein_coding
628	ENSECAG00000020342	105.382	-0.632716	0.289533	-2.1853	0.0288671	0.644096	60.6464	54.7842	124.543	76.0264	96.7995	157.058	112.561	163.789	84.1624	123.451	0	protein_coding
629	ENSECAG00000027668	51.6468	-1.1522	0.526675	-2.18769	0.0286923	0.644096	15.1616	38.4655	34.3977	28.3681	43.022	73.1131	173.268	14.6478	67.4414	28.5824	0	Mt_tRNA
630	ENSECAG00000031172	134.232	-0.722608	0.330621	-2.18561	0.0288443	0.644096	40.8197	97.9123	92.5179	105.529	169.698	146.226	207.416	89.8844	172.784	219.537	ID1	protein_coding
631	ENSECAG00000038862	6.33342	-5.88387	2.68718	-2.18961	0.0285525	0.644096	0	0	0	0	0	0	0	27.964	18.9505	16.4197	0	protein_coding
632	ENSECAG00000057625	61.6619	0.630909	0.288564	2.18638	0.028788	0.644096	65.3115	67.6061	78.2844	80.5653	84.849	44.6802	26.5593	59.2571	52.9499	56.5566	FANCD2OS	protein_coding
633	ENSECAG00000000125	179.37	-0.471791	0.216095	-2.18326	0.0290168	0.644836	181.939	101.409	179.105	156.592	131.456	238.295	209.945	234.365	160.522	200.077	SGMS1	protein_coding
634	ENSECAG00000045739	84.0163	0.670965	0.307344	2.18311	0.0290277	0.644836	102.632	64.1092	116.24	110.068	125.481	47.3881	37.9419	82.5604	94.7524	58.9891	TSNAX	protein_coding
635	ENSECAG00000023564	298.057	0.413184	0.189321	2.18245	0.0290766	0.644904	324.225	407.968	285.857	334.743	352.542	241.002	179.592	255.671	267.536	331.434	ACOT7	protein_coding
636	ENSECAG00000017216	55.8284	-0.69937	0.320569	-2.18165	0.0291352	0.645188	45.4848	43.128	47.4451	28.3681	47.8022	100.192	54.3834	75.2365	72.4577	43.7858	EHD4	protein_coding
637	ENSECAG00000010616	271.801	0.531602	0.243816	2.18034	0.0292326	0.646114	163.279	325.209	329.743	338.147	451.731	231.525	154.297	215.722	254.159	254.201	DBN1	protein_coding
638	ENSECAG00000015574	49.8001	-0.980945	0.450006	-2.17985	0.0292687	0.646114	19.8267	33.803	46.259	32.907	33.4616	113.731	101.178	31.9589	62.9825	21.8929	NFIA	protein_coding
639	ENSECAG00000008518	91.4414	-0.948619	0.435579	-2.17783	0.0294183	0.647387	24.4918	73.4342	52.1896	46.5236	114.725	129.979	213.739	31.9589	120.949	106.424	NPNT	protein_coding
640	ENSECAG00000055480	484.173	0.385757	0.177127	2.17786	0.0294167	0.647387	425.691	683.055	634.578	520.838	480.413	381.813	381.948	378.18	422.484	532.727	0	protein_coding
641	ENSECAG00000055915	6.33572	2.73668	1.25773	2.17589	0.0295634	0.649564	15.1616	6.99373	28.467	1.13472	2.39011	5.41578	3.79419	0	0	0	0	lncRNA
642	ENSECAG00000002635	148.647	-0.662777	0.305486	-2.16958	0.0300386	0.651548	110.796	94.4154	97.2624	100.99	170.893	154.35	316.183	107.195	214.586	119.803	PTGR3	protein_coding
643	ENSECAG00000007511	2.24986	-4.40835	2.02776	-2.174	0.0297054	0.651548	0	0	0	0	0	0	0	4.66067	4.45894	13.379	SPOCK1	protein_coding
644	ENSECAG00000010150	138.781	-0.63008	0.290552	-2.16856	0.0301163	0.651548	132.956	74.5998	96.0763	144.11	95.6045	232.879	183.386	95.2108	116.49	216.496	KAT7	protein_coding
645	ENSECAG00000025750	2.82859	3.18867	1.47006	2.16908	0.0300768	0.651548	6.99766	4.66249	3.55838	2.26945	8.36539	0	0	0	0	2.43254	SNORA27	snoRNA
646	ENSECAG00000032457	7.9603	2.68455	1.23727	2.16973	0.0300272	0.651548	10.4965	0	26.0948	17.0208	14.3407	4.06184	7.58838	0	0	0	0	lncRNA
647	ENSECAG00000043926	4.67306	3.64063	1.67777	2.16992	0.0300129	0.651548	8.16394	0	20.1642	0	14.3407	4.06184	0	0	0	0	0	lncRNA
648	ENSECAG00000044941	7.45374	2.95363	1.36154	2.16933	0.0300574	0.651548	6.99766	0	37.9561	2.26945	17.9258	8.12368	1.26473	0	0	0	0	lncRNA
649	ENSECAG00000049631	2.47852	3.63751	1.67702	2.16903	0.0300801	0.651548	1.16628	17.4843	1.18613	1.13472	1.19506	1.35395	1.26473	0	0	0	0	protein_coding
650	ENSECAG00000056972	5.89754	-2.86085	1.3172	-2.17192	0.0298616	0.651548	0	0	3.55838	0	3.58517	24.371	2.52946	0	13.3768	11.5546	0	lncRNA
651	ENSECAG00000058282	2.87194	3.86153	1.77947	2.17005	0.0300031	0.651548	6.99766	0	2.37225	0	16.7308	1.35395	1.26473	0	0	0	0	lncRNA
652	ENSECAG00000002189	2.32599	4.93518	2.28346	2.16128	0.030674	0.651813	0	0	13.0474	10.2125	0	0	0	0	0	0	ADAM29	protein_coding
653	ENSECAG00000006795	332.319	-0.501925	0.231623	-2.16699	0.0302357	0.651813	228.59	332.202	239.598	211.058	362.102	426.493	521.069	441.432	314.355	246.295	RYR2	protein_coding
654	ENSECAG00000007051	307.665	-0.385185	0.177701	-2.1676	0.0301894	0.651813	306.731	229.628	266.879	230.349	298.764	368.273	417.361	337.566	358.387	262.715	FXR2	protein_coding
655	ENSECAG00000009415	2102.69	0.446352	0.206935	2.15697	0.0310079	0.651813	2937.85	2389.53	2658.11	1948.32	2196.51	1127.84	1828.8	1428.16	2750.05	1761.77	SEC61G	protein_coding
656	ENSECAG00000009719	258.514	-0.409671	0.18966	-2.16002	0.0307708	0.651813	254.248	220.303	281.112	194.038	160.138	299.222	316.183	264.992	332.191	262.715	EBAG9	protein_coding
657	ENSECAG00000010053	36.6539	-0.992378	0.458604	-2.16391	0.0304713	0.651813	12.829	17.4843	23.7225	28.3681	39.4369	55.5118	82.2075	38.617	17.2784	51.0834	HJURP	protein_coding
658	ENSECAG00000013323	3.13406	-3.589	1.65883	-2.16358	0.0304968	0.651813	0	0	0	2.26945	0	4.06184	12.6473	9.32134	0	3.04068	PROM1	protein_coding
659	ENSECAG00000014247	153.139	0.603069	0.279112	2.16067	0.0307209	0.651813	317.227	173.678	160.127	154.322	118.311	142.164	86.0016	154.468	99.2113	125.884	TINAGL1	protein_coding
660	ENSECAG00000015430	86.883	0.521163	0.241321	2.15962	0.0308021	0.651813	110.796	110.734	111.496	104.395	76.4836	56.8657	60.707	85.8895	79.7035	71.76	MRPS28	protein_coding
661	ENSECAG00000020271	11.5468	1.5087	0.698827	2.15891	0.0308573	0.651813	2.33255	16.3187	28.467	10.2125	28.6813	4.06184	3.79419	5.99229	8.91787	6.68949	DPYS	protein_coding
662	ENSECAG00000020357	152.361	-0.641159	0.296722	-2.16081	0.0307102	0.651813	75.808	132.881	130.474	123.685	130.261	239.648	285.829	127.836	94.7524	182.441	SETDB2	protein_coding
663	ENSECAG00000021489	47.4092	0.690519	0.319038	2.16438	0.030435	0.651813	71.1429	55.9499	77.0983	34.0417	54.9726	36.5565	30.3535	39.2828	34.5567	40.1369	MAPK9	protein_coding
664	ENSECAG00000022265	764.886	-0.425468	0.196999	-2.15974	0.0307927	0.651813	532.988	573.486	621.531	721.684	812.638	928.807	1147.11	877.538	897.918	535.159	SMC6	protein_coding
665	ENSECAG00000023044	371.841	-0.394716	0.182303	-2.16517	0.0303749	0.651813	272.909	284.412	358.21	346.09	341.786	468.465	547.628	411.471	371.206	316.23	DDX50	protein_coding
666	ENSECAG00000023621	2.37583	4.9644	2.29387	2.1642	0.0304493	0.651813	0	0	18.978	0	4.78022	0	0	0	0	0	LRFN2	protein_coding
667	ENSECAG00000027697	8.55002	-2.06106	0.955425	-2.15722	0.0309887	0.651813	2.33255	4.66249	7.11676	2.26945	0	28.4329	13.912	6.6581	19.5078	0.608135	0	Mt_tRNA
668	ENSECAG00000051158	3660.31	-0.336971	0.156189	-2.15745	0.0309703	0.651813	3488.33	4017.9	3569.06	2199.09	2899.21	4273.05	4095.2	3764.49	4253.27	4043.49	0	lncRNA
669	ENSECAG00000053774	5.38411	3.0285	1.40373	2.15746	0.0309695	0.651813	9.33021	8.15935	27.2809	0	2.39011	5.41578	1.26473	0	0	0	0	lncRNA
670	ENSECAG00000056919	6.7142	2.78635	1.28991	2.16011	0.030764	0.651813	4.66511	2.33124	15.4197	11.3472	23.9011	9.47762	0	0	0	0	0	lncRNA
671	ENSECAG00000033394	61.6484	-0.819835	0.380407	-2.15515	0.03115	0.652851	15.1616	36.1343	42.7006	45.3889	83.6539	93.4223	58.1776	103.201	66.884	71.76	0	protein_coding
672	ENSECAG00000045044	9.32027	1.88062	0.872388	2.15572	0.0311056	0.652851	20.993	20.9812	16.6058	4.53889	10.7555	0	2.52946	11.9846	0.557367	4.25695	GK5	protein_coding
673	ENSECAG00000002710	2.26258	4.22776	1.96361	2.15305	0.0313145	0.65354	9.33021	0	1.18613	0	10.7555	1.35395	0	0	0	0	ASPRV1	protein_coding
674	ENSECAG00000015518	164.945	0.648046	0.301162	2.15182	0.0314115	0.65354	256.581	251.774	157.755	163.4	180.453	83.9447	79.678	109.859	241.34	124.668	DPP3	protein_coding
675	ENSECAG00000016512	144.958	0.594132	0.276032	2.1524	0.0313657	0.65354	211.096	207.481	161.313	184.96	109.945	81.2368	74.6191	115.185	123.735	180.008	CDK6	protein_coding
676	ENSECAG00000019691	418.951	0.429269	0.199418	2.1526	0.0313498	0.65354	290.403	566.492	459.031	518.568	571.237	356.088	293.417	319.589	423.041	391.639	LTBP1	protein_coding
677	ENSECAG00000020362	13.9904	-1.62621	0.755752	-2.15178	0.0314148	0.65354	8.16394	0	1.18613	6.80834	17.9258	18.9552	39.2066	11.9846	22.2947	13.379	MND1	protein_coding
678	ENSECAG00000010007	458.047	0.428205	0.199347	2.14804	0.0317106	0.658202	625.124	631.767	515.965	408.5	450.536	296.514	289.623	418.795	489.368	454.277	GRB2	protein_coding
679	ENSECAG00000060017	21.492	1.00931	0.469935	2.14777	0.0317324	0.658202	24.4918	31.4718	30.8393	37.4459	20.316	14.8934	3.79419	17.3111	16.721	17.6359	0	lncRNA
680	ENSECAG00000016847	277.946	0.501138	0.233499	2.14621	0.031856	0.659794	395.368	312.387	264.506	340.417	320.275	157.058	146.709	227.707	298.191	316.839	ALDH18A1	protein_coding
681	ENSECAG00000011889	123.232	-0.983604	0.458782	-2.14395	0.0320371	0.660092	130.623	110.734	17.7919	51.0625	103.97	224.755	35.4124	239.026	163.866	155.075	USPL1	protein_coding
682	ENSECAG00000012663	11116.1	0.285549	0.133144	2.14466	0.0319798	0.660092	10638.8	12897.6	13470.8	13039.1	11020.8	9543.97	8114.51	9764.77	10980.1	11690.2	CCND2	protein_coding
683	ENSECAG00000046432	2.38979	3.57749	1.6682	2.14452	0.0319913	0.660092	2.33255	0	7.11676	2.26945	9.56045	1.35395	1.26473	0	0	0	0	lncRNA
684	ENSECAG00000056642	2.26372	4.23408	1.97514	2.14369	0.0320579	0.660092	0	0	2.37225	2.26945	16.7308	0	1.26473	0	0	0	0	protein_coding
685	ENSECAG00000008973	11.1942	-1.73087	0.808565	-2.14067	0.0323005	0.663636	6.99766	5.82811	7.11676	5.67361	0	21.6631	34.1477	15.3136	13.3768	1.82441	TMEM25	protein_coding
686	ENSECAG00000015420	447.552	-0.379108	0.177122	-2.14038	0.0323242	0.663636	386.038	381.158	432.936	360.842	382.418	438.679	725.955	446.759	500.515	420.222	UBE2H	protein_coding
687	ENSECAG00000000096	50.4449	0.94068	0.441535	2.13048	0.0331321	0.669488	16.3279	50.1217	99.6347	80.5653	86.044	18.9552	30.3535	44.6093	26.7536	51.0834	SLC20A2	protein_coding
688	ENSECAG00000008311	473.862	-0.329558	0.154631	-2.13126	0.0330681	0.669488	458.347	514.039	387.864	344.956	394.369	565.949	498.304	574.594	536.187	464.007	CHMP4B	protein_coding
689	ENSECAG00000009429	43.3935	-0.852834	0.399795	-2.13318	0.0329102	0.669488	19.8267	34.9687	40.3283	20.425	38.2418	83.9447	67.0307	23.9692	46.8188	58.381	REPS2	protein_coding
690	ENSECAG00000017207	263.88	0.526216	0.24658	2.13406	0.0328379	0.669488	333.555	256.437	290.601	316.588	362.102	117.793	263.064	150.473	311.011	237.173	C14H5orf15	protein_coding
691	ENSECAG00000019406	524.812	0.277516	0.130215	2.13122	0.0330712	0.669488	569.143	586.308	536.129	602.538	584.382	445.448	435.067	464.735	551.236	473.129	PDCD5	protein_coding
692	ENSECAG00000020456	146.619	0.536872	0.251692	2.13305	0.0329203	0.669488	139.953	286.743	125.729	150.918	163.723	123.209	136.591	121.177	122.063	96.0854	ZBTB7C	protein_coding
693	ENSECAG00000021447	95.302	-0.645394	0.302918	-2.13059	0.033123	0.669488	83.9719	38.4655	96.0763	71.4875	80.0688	159.766	146.709	90.5502	75.2445	110.681	ASPH	protein_coding
694	ENSECAG00000023016	419.716	-0.356482	0.16721	-2.13193	0.0330123	0.669488	290.403	331.037	352.28	440.272	426.635	538.871	389.537	481.381	448.68	498.063	PHF3	protein_coding
695	ENSECAG00000024740	111.522	0.729478	0.341497	2.13612	0.0326697	0.669488	193.602	184.168	118.613	119.146	80.0688	81.2368	91.0606	36.6196	70.2282	140.479	COL1A2	protein_coding
696	ENSECAG00000047751	5.32544	-3.0216	1.4161	-2.13374	0.032864	0.669488	1.16628	1.16562	1.18613	1.13472	1.19506	12.1855	1.26473	33.9563	0	0	0	lncRNA
697	ENSECAG00000049381	2.38018	3.57127	1.67251	2.13528	0.0327384	0.669488	2.33255	0	11.8613	3.40417	3.58517	1.35395	1.26473	0	0	0	0	lncRNA
698	ENSECAG00000006418	2.76808	-4.69925	2.20734	-2.12892	0.0332608	0.670165	0	0	0	0	0	0	0	10.653	0	17.0278	H3C12	protein_coding
699	ENSECAG00000013636	79.9394	0.796218	0.373909	2.12944	0.0332175	0.670165	52.4824	82.7592	176.733	90.7778	103.97	31.1408	104.973	50.6016	65.2119	40.7451	HELZ2	protein_coding
700	ENSECAG00000000655	192.813	0.484368	0.227832	2.12599	0.0335043	0.671229	149.283	206.315	287.043	189.499	293.984	123.209	159.356	185.095	181.702	152.642	BPGM	protein_coding
701	ENSECAG00000013362	40.1729	-0.971182	0.456667	-2.12667	0.0334473	0.671229	25.6581	58.2811	17.7919	11.3472	22.7061	28.4329	74.6191	64.5836	35.6715	62.6379	CRYM	protein_coding
702	ENSECAG00000049310	72.2611	0.675023	0.317492	2.12611	0.0334943	0.671229	97.9672	96.7466	73.5399	107.799	69.3133	66.3434	25.2946	46.6067	56.2941	82.7064	0	protein_coding
703	ENSECAG00000052621	5.11732	6.07245	2.85451	2.12732	0.0333937	0.671229	2.33255	0	27.2809	21.5597	0	0	0	0	0	0	0	lncRNA
704	ENSECAG00000053590	2.14957	4.14862	1.95482	2.12225	0.0338163	0.676519	0	0	7.11676	2.26945	10.7555	1.35395	0	0	0	0	0	lncRNA
705	ENSECAG00000017200	193.372	0.533081	0.251326	2.12107	0.0339156	0.677543	162.112	195.825	244.342	253.043	290.399	155.704	97.3842	158.463	240.225	136.222	HDDC3	protein_coding
706	ENSECAG00000023932	601.545	0.31298	0.14766	2.1196	0.0340402	0.679068	593.635	709.864	657.114	730.762	644.135	549.702	416.096	506.681	597.497	609.96	SRSF6	protein_coding
707	ENSECAG00000002681	5.00697	2.97556	1.40619	2.11605	0.0343407	0.679541	3.49883	1.16562	7.11676	5.67361	26.2912	0	6.32365	0	0	0	SLITRK1	protein_coding
708	ENSECAG00000024109	153.219	-0.866907	0.409745	-2.11572	0.0343684	0.679541	207.597	174.843	52.1896	23.8292	83.6539	211.216	270.652	181.766	181.702	144.736	FAM83B	protein_coding
709	ENSECAG00000037942	150.513	-0.52017	0.24577	-2.11649	0.0343033	0.679541	165.611	149.2	116.24	114.607	72.8984	201.738	131.532	209.73	160.522	183.049	AEN	protein_coding
710	ENSECAG00000048598	4.02065	3.48747	1.6482	2.11593	0.034351	0.679541	1.16628	0	20.1642	15.8861	0	0	0	0	0.557367	2.43254	0	lncRNA
711	ENSECAG00000048724	2.56157	4.41957	2.08779	2.11686	0.0342716	0.679541	0	16.3187	0	7.94306	0	1.35395	0	0	0	0	0	lncRNA
712	ENSECAG00000058230	15.9659	-1.42515	0.672648	-2.11872	0.034114	0.679541	9.33021	4.66249	9.48902	10.2125	9.56045	47.3881	1.26473	19.3085	28.9831	19.4603	OR1F1	protein_coding
713	ENSECAG00000058950	2.13573	4.13947	1.95689	2.11533	0.0344016	0.679541	10.4965	0	7.11676	0	2.39011	1.35395	0	0	0	0	0	lncRNA
714	ENSECAG00000000916	69.2331	0.577981	0.273753	2.11132	0.0347446	0.681535	75.808	78.0967	87.7734	90.7778	83.6539	29.7868	64.5012	53.9306	63.5398	64.4624	BAHD1	protein_coding
715	ENSECAG00000006973	195.147	0.679497	0.32171	2.11214	0.0346743	0.681535	323.059	377.662	186.222	209.924	106.36	112.378	111.296	105.198	209.57	209.807	PHLDA2	protein_coding
716	ENSECAG00000009818	237.695	-0.470107	0.222559	-2.11228	0.0346627	0.681535	187.771	166.684	247.901	157.726	234.231	330.363	361.713	185.095	252.487	252.984	AMOTL2	protein_coding
717	ENSECAG00000021468	773.452	0.288294	0.136496	2.11211	0.0346769	0.681535	854.881	902.191	838.592	793.171	866.416	624.169	634.894	839.586	619.235	761.386	POPDC2	protein_coding
718	ENSECAG00000055954	3.20463	4.02471	1.90579	2.11184	0.0347004	0.681535	0	12.8218	16.6058	0	0	1.35395	1.26473	0	0	0	0	lncRNA
719	ENSECAG00000006269	2.16587	-4.35509	2.06427	-2.10975	0.0348797	0.682557	0	0	0	0	0	0	0	1.99743	11.1473	8.5139	SHISAL1	protein_coding
720	ENSECAG00000010597	134.941	0.530526	0.251512	2.10935	0.0349144	0.682557	225.091	173.678	157.755	125.954	117.115	100.192	74.6191	107.195	137.67	130.141	TRIT1	protein_coding
721	ENSECAG00000019173	239.832	-0.402773	0.190975	-2.10903	0.0349421	0.682557	219.26	188.831	219.433	241.696	161.333	296.514	331.359	277.643	206.226	256.025	FAM13A	protein_coding
722	ENSECAG00000000689	409.114	-0.342633	0.162571	-2.10759	0.0350662	0.683403	304.398	428.949	336.86	358.572	374.053	469.819	489.451	500.023	479.336	349.678	PPP4R2	protein_coding
723	ENSECAG00000014658	1460.92	0.407571	0.193399	2.10741	0.0350824	0.683403	1090.47	1934.93	2054.37	1809.88	1443.63	919.329	1063.64	1522.71	1420.17	1350.06	SCD	protein_coding
724	ENSECAG00000017878	7.44233	-1.96638	0.933953	-2.10544	0.0352532	0.685249	3.49883	0	4.74451	6.80834	0	17.6013	10.1178	17.3111	2.78683	11.5546	PPP1R42	protein_coding
725	ENSECAG00000018438	70.0121	-0.787017	0.373967	-2.10451	0.0353342	0.685249	27.9906	47.7905	58.1202	68.0834	53.7775	77.1749	163.15	102.535	54.0646	47.4346	CEP55	protein_coding
726	ENSECAG00000023140	309.499	0.492731	0.234207	2.10383	0.0353934	0.685249	256.581	597.964	349.907	350.629	254.547	215.277	287.094	227.707	266.421	288.864	RASSF3	protein_coding
727	ENSECAG00000041735	2.15856	4.15462	1.97508	2.10352	0.0354204	0.685249	2.33255	0	3.55838	0	14.3407	1.35395	0	0	0	0	0	lncRNA
728	ENSECAG00000052782	3.65333	2.86889	1.36336	2.10428	0.0353544	0.685249	13.9953	5.82811	3.55838	6.80834	1.19506	1.35395	3.79419	0	0	0	0	lncRNA
729	ENSECAG00000005046	163.482	-0.672734	0.320537	-2.09877	0.0358368	0.686101	178.44	143.372	96.0763	104.395	106.36	251.834	306.065	79.2314	227.963	141.087	MAB21L2	protein_coding
730	ENSECAG00000012028	40.6956	-0.877788	0.418123	-2.09935	0.0357859	0.686101	37.3209	18.65	23.7225	32.907	29.8764	56.8657	91.0606	23.9692	31.7699	60.8135	ZNF354B	protein_coding
731	ENSECAG00000014365	190.333	0.436671	0.20808	2.09858	0.0358542	0.686101	237.92	221.468	162.499	188.364	284.423	182.783	134.061	193.751	152.719	145.344	DPH6	protein_coding
732	ENSECAG00000023805	216.611	-0.481737	0.229176	-2.10204	0.0355499	0.686101	253.082	177.175	175.547	155.457	141.017	261.312	323.771	294.288	172.226	212.239	ZSWIM6	protein_coding
733	ENSECAG00000045725	2.45493	3.61925	1.72278	2.10082	0.035657	0.686101	1.16628	1.16562	7.11676	12.482	0	1.35395	1.26473	0	0	0	0	lncRNA
734	ENSECAG00000050133	2.14059	3.39794	1.6189	2.09892	0.035824	0.686101	2.33255	3.49687	4.74451	4.53889	3.58517	2.70789	0	0	0	0	0	protein_coding
735	ENSECAG00000055309	3.28009	-3.64861	1.7368	-2.10077	0.0356611	0.686101	0	1.16562	1.18613	0	0	13.5395	7.58838	9.32134	0	0	0	lncRNA
736	ENSECAG00000059370	2.2228	4.86932	2.3173	2.1013	0.0356151	0.686101	0	0	15.4197	6.80834	0	0	0	0	0	0	0	lncRNA
737	ENSECAG00000006696	67.5189	0.58065	0.277243	2.09438	0.0362265	0.687621	66.4778	65.2748	99.6347	93.0473	81.2638	41.9723	55.6481	46.6067	73.5724	51.6915	TMTC4	protein_coding
738	ENSECAG00000009766	14.4185	-1.9631	0.936987	-2.09512	0.0361605	0.687621	2.33255	1.16562	22.5364	2.26945	1.19506	37.9105	0	33.9563	23.9668	18.8522	CMAH	protein_coding
739	ENSECAG00000017943	98.9409	-0.58105	0.277396	-2.09466	0.0362011	0.687621	87.4707	106.072	91.3318	61.275	48.9973	140.81	146.709	82.5604	102.556	121.627	ZNF608	protein_coding
740	ENSECAG00000019602	10.8949	2.01685	0.962498	2.09544	0.0361323	0.687621	5.83138	18.65	45.0728	11.3472	5.97528	5.41578	8.85311	0	7.80314	0	DLEC1	protein_coding
741	ENSECAG00000020654	38.6026	0.755593	0.360463	2.09617	0.0360669	0.687621	55.9813	47.7905	54.5618	36.3111	47.8022	18.9552	39.2066	36.6196	31.7699	17.0278	LIX1L	protein_coding
742	ENSECAG00000024981	22.0259	0.936339	0.446602	2.09659	0.0360303	0.687621	37.3209	29.1406	23.7225	31.7722	23.9011	10.8316	7.58838	22.6375	14.4915	18.8522	HFE	protein_coding
743	ENSECAG00000016261	239.265	-0.482431	0.230407	-2.09382	0.0362761	0.687635	159.78	121.225	292.973	204.25	218.695	322.239	312.388	260.998	224.619	275.485	UACA	protein_coding
744	ENSECAG00000053090	2.63837	3.72133	1.77779	2.09323	0.0363283	0.687699	0	5.82811	2.37225	1.13472	14.3407	2.70789	0	0	0	0	0	lncRNA
745	ENSECAG00000059557	13.5237	-1.83355	0.876202	-2.09261	0.0363843	0.687834	2.33255	2.33124	7.11676	3.40417	14.3407	33.8487	24.0299	18.6427	0	29.1905	0	lncRNA
746	ENSECAG00000010145	249.476	-0.574872	0.275062	-2.08997	0.0366201	0.690146	127.124	136.378	150.638	240.561	346.566	299.222	389.537	290.959	301.535	212.239	LPL	protein_coding
747	ENSECAG00000010431	1266.51	-0.270881	0.129622	-2.08978	0.0366373	0.690146	1025.16	1075.87	1144.61	1206.21	1285.88	1501.53	1421.56	1554	1207.26	1243.03	THOC2	protein_coding
748	ENSECAG00000015185	129.711	0.482112	0.230719	2.0896	0.0366536	0.690146	146.951	115.397	193.339	156.592	145.797	98.8381	77.1485	136.491	123.178	103.383	AK6	protein_coding
749	ENSECAG00000008511	10978.8	-0.345476	0.16566	-2.08545	0.0370288	0.690747	7075.8	9073.2	10287.3	11474.3	10443.6	12792.1	9157.91	15642.5	11830.7	12010.7	HSP90AB1	protein_coding
750	ENSECAG00000010736	752.619	-0.363343	0.174088	-2.08713	0.0368767	0.690747	735.921	747.164	568.155	594.595	642.94	965.364	1002.93	966.756	683.889	618.474	RESF1	protein_coding
751	ENSECAG00000015745	87.3503	-0.753186	0.360859	-2.0872	0.03687	0.690747	50.1499	62.9436	102.007	49.9278	58.5577	161.12	168.209	101.203	71.343	48.0427	BLNK	protein_coding
752	ENSECAG00000016551	915.966	-0.387842	0.185899	-2.08631	0.0369504	0.690747	609.963	863.726	845.709	809.057	836.539	1284.89	1164.82	1225.09	759.691	760.169	RAB13	protein_coding
753	ENSECAG00000018241	47.1766	0.705061	0.338064	2.08558	0.0370163	0.690747	57.1476	62.9436	45.0728	54.4667	70.5083	43.3263	56.9129	29.2956	28.9831	23.1091	REC114	protein_coding
754	ENSECAG00000022687	889.661	0.349471	0.167567	2.08556	0.0370182	0.690747	1397.2	854.401	935.854	832.887	965.605	717.591	761.367	792.98	930.245	708.478	STT3A	protein_coding
755	ENSECAG00000047334	2.52104	4.39272	2.10582	2.08599	0.0369799	0.690747	0	0	5.93064	0	17.9258	1.35395	0	0	0	0	0	lncRNA
756	ENSECAG00000013149	2467.24	0.327283	0.157007	2.08451	0.0371138	0.691345	3775.24	2832.46	2414.95	2468.02	2240.73	2091.85	1974.24	2050.03	2404.48	2420.38	TMBIM6	protein_coding
757	ENSECAG00000013222	396.127	0.314376	0.150891	2.08347	0.0372081	0.691345	503.831	462.752	376.002	401.692	452.926	370.981	289.623	367.527	372.878	363.057	TMEM230	protein_coding
758	ENSECAG00000046159	6.29584	2.71413	1.3027	2.08348	0.0372079	0.691345	2.33255	1.16562	30.8393	17.0208	2.39011	5.41578	3.79419	0	0	0	0	lncRNA
759	ENSECAG00000008738	206.973	-0.739961	0.355355	-2.08231	0.0373138	0.691484	148.117	53.6186	113.868	158.861	299.959	431.909	184.651	284.301	222.947	171.494	ID2	protein_coding
760	ENSECAG00000019411	51.9498	1.11283	0.53436	2.08255	0.037292	0.691484	22.1593	15.1531	87.7734	125.954	103.97	37.9105	29.0888	56.5939	11.7047	29.1905	HERC6	protein_coding
761	ENSECAG00000054799	2.57793	3.69255	1.77464	2.08074	0.0374581	0.693246	5.83138	0	7.11676	10.2125	0	1.35395	1.26473	0	0	0	0	lncRNA
762	ENSECAG00000020378	118.176	0.618456	0.297425	2.07937	0.0375837	0.694658	248.417	132.881	97.2624	129.358	107.555	100.192	91.0606	59.9229	88.6213	126.492	NQO1	protein_coding
763	ENSECAG00000021478	1260.18	0.260945	0.125556	2.07832	0.0376802	0.695528	1512.66	1254.21	1337.95	1432.02	1336.07	1072.33	987.754	1232.41	1126.44	1309.92	EIF4A1	protein_coding
764	ENSECAG00000012137	58.8544	0.666579	0.321126	2.07576	0.0379163	0.697664	80.4731	72.2686	56.9341	85.1042	68.1182	40.6184	21.5004	67.2468	51.2778	45.002	FECH	protein_coding
765	ENSECAG00000020032	47.7572	0.696937	0.335781	2.07557	0.037934	0.697664	45.4848	59.4467	61.6786	43.1195	84.849	31.1408	53.1187	30.6273	26.7536	41.3532	MTHFR	protein_coding
766	ENSECAG00000056532	2.9956	3.91481	1.88624	2.07545	0.0379445	0.697664	3.49883	0	20.1642	0	3.58517	2.70789	0	0	0	0	0	lncRNA
767	ENSECAG00000057627	28.7759	-1.14092	0.549987	-2.07446	0.038037	0.698452	8.16394	11.6562	22.5364	13.6167	33.4616	59.5736	40.4714	54.5964	7.80314	35.88	0	protein_coding
768	ENSECAG00000047232	76.4529	-0.540055	0.26059	-2.07243	0.038225	0.700991	76.9743	71.1029	59.3064	53.332	50.1924	100.192	99.9137	66.581	104.228	82.7064	BIRC3	protein_coding
769	ENSECAG00000048749	2.4511	4.35216	2.10295	2.06955	0.0384948	0.70502	0	0	10.6751	12.482	0	1.35395	0	0	0	0	0	lncRNA
770	ENSECAG00000020874	146.384	-0.530692	0.256498	-2.06899	0.0385466	0.705052	99.1335	139.875	105.565	86.2389	167.308	139.456	246.622	197.08	142.686	139.871	TCN2	protein_coding
771	ENSECAG00000008991	44.6171	-0.801302	0.38786	-2.06596	0.0388327	0.706354	37.3209	16.3187	36.7699	48.7931	22.7061	64.9894	74.6191	65.2494	49.6057	29.7986	NDE1	protein_coding
772	ENSECAG00000010043	10.803	1.23009	0.596375	2.06261	0.0391495	0.706354	15.1616	10.4906	20.1642	20.425	9.56045	8.12368	3.79419	8.65553	5.57367	6.08135	SATB2	protein_coding
773	ENSECAG00000010289	262.96	-0.575214	0.2789	-2.06244	0.0391662	0.706354	185.438	165.518	284.67	154.322	265.302	194.968	555.216	326.247	255.274	242.646	CITED2	protein_coding
774	ENSECAG00000013702	3.92414	3.37768	1.63388	2.06728	0.0387082	0.706354	1.16628	0	21.3503	9.07778	3.58517	4.06184	0	0	0	0	ATP1B4	protein_coding
775	ENSECAG00000017857	273.653	-0.41058	0.198726	-2.06606	0.038823	0.706354	199.433	296.068	168.43	253.043	255.742	339.84	387.007	304.941	268.093	263.931	SMAD4	protein_coding
776	ENSECAG00000035459	34.0733	0.75991	0.367808	2.06605	0.0388239	0.706354	39.6534	34.9687	35.5838	57.8709	46.6072	29.7868	13.912	33.9563	22.852	25.5417	BATF2	protein_coding
777	ENSECAG00000037578	38.0793	1.01458	0.491682	2.06348	0.0390672	0.706354	116.628	55.9499	32.0254	28.3681	22.7061	13.5395	22.7651	17.3111	36.2288	35.2719	ELFN1	protein_coding
778	ENSECAG00000044165	3.031	3.93433	1.906	2.06419	0.039	0.706354	0	0	7.11676	19.2903	1.19506	2.70789	0	0	0	0	0	lncRNA
779	ENSECAG00000045061	3.57219	3.30346	1.60009	2.06454	0.0389664	0.706354	3.49883	0	9.48902	3.40417	15.5357	0	3.79419	0	0	0	0	protein_coding
780	ENSECAG00000049794	1448.34	-0.537523	0.26063	-2.0624	0.0391695	0.706354	683.438	1908.12	825.544	1394.57	1094.67	1653.17	2568.67	1449.47	1074.6	1831.1	0	lncRNA
781	ENSECAG00000056268	3.00583	3.91879	1.89977	2.06277	0.0391345	0.706354	1.16628	0	14.2335	0	11.9506	2.70789	0	0	0	0	0	lncRNA
782	ENSECAG00000021030	50.4887	-0.784739	0.380697	-2.06132	0.0392721	0.7073	66.4778	12.8218	39.1422	40.85	26.2912	67.6973	50.5892	71.2417	64.0972	65.6786	IFT74	protein_coding
783	ENSECAG00000004592	10.41	2.16218	1.04986	2.05949	0.0394472	0.709547	1.16628	30.3062	37.9561	13.6167	2.39011	2.70789	2.52946	0	12.8194	0.608135	DUSP4	protein_coding
784	ENSECAG00000020566	8.38663	1.56499	0.760233	2.05856	0.039536	0.710235	18.6604	6.99373	9.48902	15.8861	11.9506	4.06184	2.52946	5.32648	8.3605	0.608135	DYNC2LI1	protein_coding
785	ENSECAG00000004904	10.8051	-1.67426	0.814121	-2.05652	0.0397323	0.710265	4.66511	0	10.6751	9.07778	1.19506	13.5395	29.0888	21.9717	4.45894	13.379	SMO	protein_coding
786	ENSECAG00000014135	14.9644	2.02086	0.982945	2.05592	0.0397898	0.710265	5.83138	4.66249	20.1642	15.8861	72.8984	13.5395	6.32365	0	0	10.3383	SLA2	protein_coding
787	ENSECAG00000020816	64.792	0.565281	0.274821	2.05691	0.0396949	0.710265	66.4778	74.5998	73.5399	108.933	63.338	51.45	49.3245	55.2622	62.4251	42.5695	PDLIM1	protein_coding
788	ENSECAG00000022236	155.595	-0.74725	0.363414	-2.05619	0.0397638	0.710265	118.96	149.2	65.237	91.9126	154.162	250.48	319.977	123.175	219.603	63.2461	PLEKHA5	protein_coding
789	ENSECAG00000051951	2.44104	4.34622	2.11248	2.0574	0.0396477	0.710265	0	0	0	15.8861	7.17034	1.35395	0	0	0	0	0	lncRNA
790	ENSECAG00000005335	14.5865	1.14473	0.557281	2.05414	0.039962	0.711535	26.8244	24.4781	21.3503	15.8861	11.9506	10.8316	6.32365	13.982	10.59	3.64881	HDHD3	protein_coding
791	ENSECAG00000047022	2.13371	3.40171	1.65595	2.05423	0.0399531	0.711535	1.16628	2.33124	5.93064	3.40417	5.97528	0	2.52946	0	0	0	0	lncRNA
792	ENSECAG00000009501	14.6887	-1.13335	0.552339	-2.0519	0.0401791	0.712858	13.9953	5.82811	8.30289	11.3472	5.97528	24.371	31.6183	18.6427	12.8194	13.9871	DAAM2	protein_coding
793	ENSECAG00000010326	55.2162	-0.772166	0.376501	-2.0509	0.0402766	0.712858	22.1593	25.6437	49.8173	61.275	44.2171	74.467	101.178	42.6118	46.2615	84.5308	MIS18A	protein_coding
794	ENSECAG00000018187	99.8356	-0.500874	0.24426	-2.05058	0.040308	0.712858	97.9672	95.581	78.2844	73.757	66.9231	101.546	156.827	125.838	89.7361	111.897	MSL2	protein_coding
795	ENSECAG00000024272	275.611	0.517002	0.251993	2.05165	0.0402032	0.712858	136.454	347.355	360.583	399.422	377.638	226.109	273.182	179.103	225.176	231.091	RIMS1	protein_coding
796	ENSECAG00000038436	109.769	0.569898	0.277965	2.05025	0.04034	0.712858	164.445	89.7529	155.383	110.068	137.431	73.1131	84.7369	81.8946	138.227	62.6379	0	protein_coding
797	ENSECAG00000041942	4.41566	3.07382	1.49892	2.05069	0.0402973	0.712858	4.66511	0	13.0474	9.07778	11.9506	5.41578	0	0	0	0	0	lncRNA
798	ENSECAG00000023608	4.92872	-2.31801	1.13133	-2.04892	0.0404698	0.713363	3.49883	4.66249	0	0	0	13.5395	8.85311	3.32905	11.1473	4.25695	TMEM171	protein_coding
799	ENSECAG00000058550	2.56361	-3.92186	1.91399	-2.04906	0.0404567	0.713363	0	0	0	1.13472	0	8.12368	5.05892	11.3188	0	0	0	lncRNA
800	ENSECAG00000054721	4.94196	-5.52683	2.69854	-2.04808	0.0405517	0.713913	0	0	0	0	0	0	0	29.9615	13.3768	6.08135	0	protein_coding
801	ENSECAG00000000046	23.4582	2.9038	1.4198	2.04522	0.0408335	0.715297	2.33255	160.856	14.2335	27.2333	2.39011	1.35395	8.85311	0	16.721	0.608135	FAM13C	protein_coding
802	ENSECAG00000011661	80.9169	-0.659243	0.322327	-2.04526	0.0408292	0.715297	64.1452	47.7905	56.9341	105.529	39.4369	88.0065	93.59	120.512	61.8677	131.357	NSD2	protein_coding
803	ENSECAG00000034245	631.23	0.313088	0.15306	2.04552	0.0408032	0.715297	727.757	820.598	632.206	624.098	695.523	572.719	433.802	554.62	667.168	583.81	EIF4EBP2	protein_coding
804	ENSECAG00000045885	116.791	-0.745825	0.364518	-2.04606	0.0407505	0.715297	36.1546	67.6061	132.846	116.876	82.4589	129.979	208.68	75.2365	220.16	97.9098	0	lncRNA
805	ENSECAG00000055525	3.12219	3.09308	1.51287	2.0445	0.0409037	0.715637	4.66511	3.49687	8.30289	1.13472	9.56045	4.06184	0	0	0	0	0	lncRNA
806	ENSECAG00000001988	4.50177	-2.13781	1.04644	-2.04293	0.0410594	0.71747	2.33255	3.49687	0	1.13472	1.19506	9.47762	15.1768	3.99486	3.3442	4.86508	FAT3	protein_coding
807	ENSECAG00000007965	350.873	-0.336243	0.164724	-2.04125	0.0412258	0.718732	263.579	303.062	352.28	339.282	293.984	297.868	436.332	425.453	418.025	378.868	CDK9	protein_coding
808	ENSECAG00000009954	2.38487	3.56197	1.74589	2.0402	0.0413305	0.718732	0	4.66249	9.48902	3.40417	3.58517	2.70789	0	0	0	0	OTOGL	protein_coding
809	ENSECAG00000010684	471.148	-0.310434	0.152107	-2.0409	0.041261	0.718732	375.541	372.999	451.914	418.713	483.998	500.96	540.04	613.877	435.304	518.131	PHIP	protein_coding
810	ENSECAG00000020497	147.27	-0.734382	0.360056	-2.03963	0.0413868	0.718732	92.1359	198.156	55.748	159.996	47.8022	128.625	117.62	227.041	229.078	216.496	CCDC117	protein_coding
811	ENSECAG00000022686	148.532	-0.490722	0.240538	-2.0401	0.0413403	0.718732	155.115	114.231	120.985	104.395	120.701	226.109	206.151	179.103	152.719	105.816	MRAP2	protein_coding
812	ENSECAG00000014949	2715.64	0.240286	0.117909	2.03789	0.0415607	0.720863	2781.57	2783.51	2859.75	3022.9	3255.33	2855.47	2499.11	2222.47	2621.3	2254.97	TPM1	protein_coding
813	ENSECAG00000008182	59.0195	-0.781559	0.383839	-2.03616	0.0417342	0.721196	44.3185	29.1406	83.0289	18.1556	41.827	83.9447	99.9137	80.563	55.1793	54.1241	CHST9	protein_coding
814	ENSECAG00000017457	18.3989	1.22281	0.601596	2.03261	0.042092	0.721196	26.8244	10.4906	49.8173	31.7722	10.7555	8.12368	3.79419	13.982	8.3605	20.0685	CYTIP	protein_coding
815	ENSECAG00000018431	322.511	0.348968	0.171672	2.03276	0.042077	0.721196	419.86	397.477	319.068	279.142	391.978	285.683	264.329	243.021	300.421	324.136	RIBC1	protein_coding
816	ENSECAG00000023673	33.6162	0.952733	0.46852	2.03349	0.0420027	0.721196	41.986	20.9812	49.8173	61.275	48.9973	13.5395	15.1768	11.3188	45.7041	27.3661	TARBP1	protein_coding
817	ENSECAG00000024554	67.3576	0.708823	0.348245	2.03541	0.0418093	0.721196	103.799	31.4718	105.565	77.1612	99.1897	70.4052	43.0008	45.9409	36.2288	60.8135	TMEM106A	protein_coding
818	ENSECAG00000030196	398.329	0.296031	0.145547	2.03392	0.0419595	0.721196	403.532	441.771	454.287	476.584	419.465	334.425	380.684	328.91	421.927	321.704	0	protein_coding
819	ENSECAG00000036730	4.87966	2.57555	1.26688	2.033	0.042053	0.721196	9.33021	17.4843	8.30289	4.53889	1.19506	5.41578	2.52946	0	0	0	0	snoRNA
820	ENSECAG00000041395	363.227	-0.378831	0.185963	-2.03713	0.0416367	0.721196	352.216	314.718	195.711	373.324	344.176	358.796	394.596	432.111	420.255	446.371	IER2	protein_coding
821	ENSECAG00000049862	12.625	-1.55777	0.765013	-2.03627	0.0417231	0.721196	2.33255	1.16562	10.6751	9.07778	8.36539	24.371	40.4714	18.6427	4.45894	6.68949	0	lncRNA
822	ENSECAG00000052761	22.8008	0.89714	0.441097	2.03388	0.0419634	0.721196	29.1569	22.1468	33.2116	39.7153	25.0962	10.8316	12.6473	11.3188	18.9505	24.9336	0	protein_coding
823	ENSECAG00000005386	10.8213	1.73887	0.856206	2.0309	0.0422648	0.721524	8.16394	38.4655	16.6058	15.8861	3.58517	12.1855	2.52946	4.66067	6.13104	0	SFR1	protein_coding
824	ENSECAG00000024631	125.673	-0.592577	0.291772	-2.03096	0.0422591	0.721524	45.4848	99.0779	136.405	81.7	138.627	166.535	123.944	193.085	119.834	152.034	CPXM2	protein_coding
825	ENSECAG00000039158	978.776	0.323476	0.159256	2.03117	0.0422377	0.721524	878.206	1176.11	1042.61	1355.99	990.701	812.368	680.425	908.165	985.982	957.205	FDPS	protein_coding
826	ENSECAG00000008307	125.051	-0.503413	0.248014	-2.02978	0.0423791	0.721725	99.1335	127.053	100.821	113.472	75.2885	169.243	182.121	103.866	169.44	110.073	UBE4B	protein_coding
827	ENSECAG00000021774	26.9326	0.974082	0.479821	2.03009	0.0423469	0.721725	65.3115	18.65	29.6532	26.0986	39.4369	10.8316	17.7062	15.9794	12.8194	32.8393	DNAAF5	protein_coding
828	ENSECAG00000003278	7.21671	1.70236	0.839984	2.02665	0.0426978	0.722784	9.33021	11.6562	10.6751	21.5597	2.39011	4.06184	0	2.66324	5.57367	4.25695	TRIM9	protein_coding
829	ENSECAG00000014501	4.58734	-2.44562	1.20666	-2.02677	0.0426859	0.722784	1.16628	2.33124	0	1.13472	2.39011	8.12368	17.7062	4.66067	8.3605	0	TMEM54	protein_coding
830	ENSECAG00000017581	1557.54	-0.338797	0.167069	-2.02788	0.0425721	0.722784	1144.12	1609.72	1091.24	1368.48	1661.13	1961.87	2023.57	1842.3	1480.37	1392.63	CYB5A	protein_coding
831	ENSECAG00000046010	38.9943	0.829306	0.408983	2.02773	0.042588	0.722784	62.9789	16.3187	51.0035	61.275	58.5577	31.1408	16.4415	23.9692	31.7699	36.4881	0	lncRNA
832	ENSECAG00000049912	2.37468	4.30232	2.1223	2.02719	0.0426428	0.722784	0	8.15935	14.2335	0	0	1.35395	0	0	0	0	0	lncRNA
833	ENSECAG00000020748	2.37116	3.55273	1.75438	2.02506	0.0428612	0.724679	9.33021	0	4.74451	4.53889	2.39011	2.70789	0	0	0	0	CNGB3	protein_coding
834	ENSECAG00000017905	19.6331	-1.018	0.503212	-2.023	0.0430731	0.727009	5.83138	13.9875	9.48902	9.07778	26.2912	27.0789	35.4124	23.3034	23.9668	21.8929	LTBP4	protein_coding
835	ENSECAG00000033952	93.8931	-0.533803	0.263904	-2.02272	0.0431023	0.727009	82.8056	69.9373	102.007	78.2959	48.9973	128.625	142.914	91.216	91.9655	102.167	TMEM123	protein_coding
836	ENSECAG00000059074	7.42512	2.54978	1.26099	2.02205	0.043171	0.727297	11.6628	0	15.4197	7.94306	27.4863	5.41578	6.32365	0	0	0	0	lncRNA
837	ENSECAG00000015864	5167.33	-0.502946	0.249121	-2.01888	0.0434996	0.730933	3271.41	6191.78	1944.06	3791.11	6178.44	7475.14	6790.34	5805.86	5388.07	4837.11	INHA	protein_coding
838	ENSECAG00000026842	589.427	0.430619	0.213291	2.01893	0.0434944	0.730933	423.358	934.829	583.574	515.164	926.168	515.853	540.04	495.363	470.975	488.941	ACER3	protein_coding
839	ENSECAG00000045441	2.13106	4.80774	2.38188	2.01847	0.0435425	0.730933	2.33255	0	18.978	0	0	0	0	0	0	0	0	protein_coding
840	ENSECAG00000012264	45.9578	0.840609	0.416581	2.01788	0.0436042	0.731096	57.1476	40.7968	85.4011	60.1403	53.7775	12.1855	17.7062	29.9615	56.8514	45.6102	TMCC2	protein_coding
841	ENSECAG00000025092	5.83359	-2.15469	1.06849	-2.01657	0.0437404	0.732509	0	1.16562	7.11676	1.13472	1.19506	12.1855	16.4415	3.99486	1.11473	13.9871	CDC25B	protein_coding
842	ENSECAG00000049083	2.35382	3.5417	1.75692	2.01586	0.0438142	0.732874	6.99766	2.33124	3.55838	7.94306	0	2.70789	0	0	0	0	0	lncRNA
843	ENSECAG00000006590	4.39051	2.70893	1.346	2.01258	0.0441589	0.734325	18.6604	1.16562	5.93064	9.07778	2.39011	5.41578	1.26473	0	0	0	C26H21orf62	protein_coding
844	ENSECAG00000010940	7.66782	2.24449	1.11552	2.01206	0.0442138	0.734325	10.4965	3.49687	16.6058	13.6167	17.9258	9.47762	5.05892	0	0	0	MGAM2	protein_coding
845	ENSECAG00000011535	161.854	-0.536396	0.266563	-2.01226	0.0441923	0.734325	128.29	131.715	135.218	128.224	135.041	232.879	265.593	141.818	94.7524	225.01	KCTD9	protein_coding
846	ENSECAG00000014046	198.622	-0.342252	0.169982	-2.01346	0.0440659	0.734325	165.611	195.825	169.616	163.4	179.258	247.772	249.152	215.722	196.751	203.117	ANKMY2	protein_coding
847	ENSECAG00000016234	6.47021	-2.52675	1.25555	-2.01246	0.0441711	0.734325	0	0	9.48902	0	0	25.725	15.1768	1.99743	5.0163	7.29763	ANGPTL2	protein_coding
848	ENSECAG00000020229	2.6414	-4.60357	2.28605	-2.01376	0.0440345	0.734325	0	0	0	0	0	0	22.7651	0	0	3.64881	NME4	protein_coding
849	ENSECAG00000021834	119.751	0.420324	0.209095	2.01021	0.0444092	0.736701	132.956	141.04	120.985	141.84	150.577	93.4223	79.678	127.17	106.457	103.383	MIOS	protein_coding
850	ENSECAG00000058144	2.42998	3.00124	1.49634	2.00572	0.0448862	0.743738	1.16628	2.33124	3.55838	6.80834	7.17034	2.70789	0	0	0.557367	0	0	lncRNA
851	ENSECAG00000015597	1639.79	0.355546	0.177599	2.00195	0.0452897	0.749542	1386.7	2569.03	1531.29	1953.99	1765.1	1297.08	1302.67	1334.28	1429.65	1828.06	HIF1A	protein_coding
852	ENSECAG00000056523	3.76858	3.30738	1.65333	2.00044	0.0454529	0.75136	0	1.16562	13.0474	17.0208	2.39011	4.06184	0	0	0	0	0	lncRNA
853	ENSECAG00000051148	3.81807	2.87445	1.43731	1.99989	0.0455124	0.751461	0	5.82811	13.0474	6.80834	7.17034	4.06184	1.26473	0	0	0	0	protein_coding
854	ENSECAG00000009354	4.89731	2.20087	1.10375	1.99399	0.0461536	0.752346	1.16628	8.15935	4.74451	14.7514	11.9506	0	0	3.99486	0.557367	3.64881	NEPRO	protein_coding
855	ENSECAG00000009621	103.074	-0.721851	0.361414	-1.9973	0.0457931	0.752346	17.4941	79.2623	65.237	121.415	105.165	157.058	130.267	131.83	115.375	107.64	INCENP	protein_coding
856	ENSECAG00000009651	72.8027	0.712962	0.357368	1.99504	0.0460388	0.752346	121.293	129.384	87.7734	35.1764	77.6786	74.467	53.1187	57.9255	60.1956	31.0149	TASOR	protein_coding
857	ENSECAG00000013505	4.64969	-3.13808	1.57009	-1.99866	0.0456451	0.752346	0	1.16562	1.18613	0	2.39011	1.35395	22.7651	0	0	17.6359	0	protein_coding
858	ENSECAG00000014268	393.168	-0.333492	0.167137	-1.99532	0.0460081	0.752346	306.731	385.821	370.072	363.111	310.715	477.943	545.099	440.766	362.288	369.138	KDM5B	protein_coding
859	ENSECAG00000016829	18.0503	1.40858	0.706186	1.99463	0.0460832	0.752346	10.4965	9.32498	32.0254	36.3111	44.2171	0	5.05892	9.32134	23.4094	10.3383	ABTB2	protein_coding
860	ENSECAG00000024719	467.407	-0.631623	0.316112	-1.9981	0.0457062	0.752346	174.941	241.284	601.366	467.506	346.566	630.939	978.901	444.095	470.418	318.055	0	protein_coding
861	ENSECAG00000038173	58.9794	0.650668	0.32628	1.9942	0.0461301	0.752346	76.9743	67.6061	59.3064	99.8556	58.5577	37.9105	24.0299	43.2777	59.6383	62.6379	CAPN10	protein_coding
862	ENSECAG00000048391	47.8399	0.711452	0.356187	1.99741	0.0457808	0.752346	27.9906	75.7654	74.726	54.4667	64.533	35.2026	31.6183	41.2802	48.4909	24.3254	COQ4	protein_coding
863	ENSECAG00000058009	30.244	1.43564	0.719733	1.99469	0.0460766	0.752346	0	22.1468	73.5399	46.5236	78.8737	21.6631	5.05892	19.9743	26.7536	7.90576	0	lncRNA
864	ENSECAG00000060279	4.87522	-2.85303	1.42988	-1.9953	0.0460099	0.752346	0	0	5.93064	0	0	20.3092	0	5.99229	5.57367	10.9464	0	protein_coding
865	ENSECAG00000057532	4.20226	3.00875	1.50957	1.99311	0.0462491	0.753032	1.16628	1.16562	30.8393	1.13472	2.39011	4.06184	1.26473	0	0	0	0	lncRNA
866	ENSECAG00000013988	23.5432	-1.07657	0.540509	-1.99176	0.0463971	0.753573	12.829	19.8156	10.6751	12.482	19.1209	40.6184	64.5012	9.98715	28.9831	16.4197	DLC1	protein_coding
867	ENSECAG00000016127	231.395	-0.435519	0.218603	-1.99228	0.0463402	0.753573	255.415	186.5	192.153	157.726	190.014	329.009	295.947	281.638	261.962	163.588	CLPX	protein_coding
868	ENSECAG00000038999	528.041	-0.353512	0.177524	-1.99135	0.0464429	0.753573	391.869	638.761	455.473	390.345	439.781	614.692	727.22	587.91	501.63	532.727	0	protein_coding
869	ENSECAG00000001177	2.36188	-3.79689	1.91161	-1.98623	0.0470082	0.761684	0	0	1.18613	0	0	0	12.6473	5.32648	4.45894	0	GPER1	protein_coding
870	ENSECAG00000015443	2.43102	2.97247	1.49726	1.98528	0.0471136	0.761684	2.33255	3.49687	1.18613	6.80834	7.17034	2.70789	0	0	0	0.608135	OSBP2	protein_coding
871	ENSECAG00000023397	32.3411	1.03509	0.52149	1.98487	0.0471591	0.761684	47.8173	30.3062	18.978	24.9639	94.4094	44.6802	10.1178	18.6427	19.5078	13.9871	C1QTNF1	protein_coding
872	ENSECAG00000037439	2.41658	-3.83064	1.92953	-1.98527	0.047114	0.761684	0	0	1.18613	0	0	12.1855	0	0	1.6721	9.12203	SERTM1	protein_coding
873	ENSECAG00000052220	6.16166	1.87411	0.9445	1.98424	0.0472295	0.761947	10.4965	16.3187	13.0474	4.53889	4.78022	0	0	6.6581	3.3442	2.43254	0	protein_coding
874	ENSECAG00000024766	500.562	-0.324111	0.163499	-1.98234	0.0474412	0.764488	433.855	389.318	456.659	486.796	452.926	663.434	631.1	565.273	520.023	406.234	CREBBP	protein_coding
875	ENSECAG00000020524	86.2017	0.492846	0.248681	1.98184	0.0474969	0.764511	109.63	79.2623	118.613	106.664	88.4341	63.6355	98.6489	72.5733	61.3104	63.2461	MRNIP	protein_coding
876	ENSECAG00000034667	89.7373	-0.587525	0.296569	-1.98107	0.0475834	0.765027	61.8127	82.7592	61.6786	54.4667	96.7995	117.793	137.856	136.491	60.753	86.9634	0	protein_coding
877	ENSECAG00000030478	15.6867	-1.37543	0.694702	-1.97989	0.047716	0.766285	20.993	10.4906	3.55838	2.26945	5.97528	25.725	44.2656	10.653	25.6389	7.29763	GPR88	protein_coding
878	ENSECAG00000000064	341	0.385677	0.195108	1.97673	0.0480719	0.766754	470.009	342.693	404.469	349.495	368.077	204.446	292.153	278.309	409.665	290.689	ELOC	protein_coding
879	ENSECAG00000007242	7.91293	1.88305	0.951515	1.97901	0.0478153	0.766754	10.4965	30.3062	10.6751	6.80834	4.78022	0	0	4.66067	1.6721	9.73017	DUSP2	protein_coding
880	ENSECAG00000014997	3.14304	-3.01637	1.52485	-1.97815	0.0479123	0.766754	0	0	0	2.26945	1.19506	0	7.58838	5.32648	1.6721	13.379	0	protein_coding
881	ENSECAG00000018002	15.2364	-1.53616	0.776515	-1.97828	0.0478977	0.766754	12.829	5.82811	7.11676	12.482	1.19506	6.76973	1.26473	31.9589	33.9994	38.9207	FOSB	protein_coding
882	ENSECAG00000020937	3.64268	3.31235	1.67535	1.97711	0.0480292	0.766754	0	0	11.8613	0	21.511	0	0	1.33162	1.11473	0.608135	KCNA3	protein_coding
883	ENSECAG00000021239	74.6585	0.638695	0.323082	1.97688	0.0480552	0.766754	46.6511	104.906	81.8428	79.4306	142.212	59.5736	50.5892	44.6093	54.0646	82.7064	CCDC92	protein_coding
884	ENSECAG00000003602	2.25772	4.22486	2.14363	1.97089	0.0487366	0.771127	11.6628	0	0	0	9.56045	1.35395	0	0	0	0	SLC26A7	protein_coding
885	ENSECAG00000006881	3240.63	0.332904	0.16914	1.96821	0.0490434	0.771127	4571.8	3025.95	3188.31	3657.21	3625.8	2334.2	2212.01	2924.9	3154.7	3711.45	CKAP4	protein_coding
886	ENSECAG00000007250	253.369	0.39192	0.199336	1.96612	0.0492847	0.771127	316.061	223.799	220.62	376.728	299.959	211.216	244.093	199.077	186.718	255.417	RNF114	protein_coding
887	ENSECAG00000009779	13.7191	-2.09966	1.07126	-1.95999	0.0499971	0.771127	0	3.49687	17.7919	4.53889	0	25.725	48.0597	26.6324	0	10.9464	SORCS2	protein_coding
888	ENSECAG00000011132	1963.84	0.234115	0.118692	1.97245	0.0485579	0.771127	1804.23	2073.64	2085.21	2242.21	2410.43	1728.99	1780.74	1742.42	1995.37	1775.15	DDX5	protein_coding
889	ENSECAG00000011419	139.181	0.47824	0.243745	1.96205	0.0497564	0.771127	173.775	159.69	131.66	147.514	200.769	74.467	96.1195	114.519	164.981	128.317	CLPB	protein_coding
890	ENSECAG00000012736	10.3911	1.48753	0.75621	1.96709	0.0491726	0.771127	6.99766	10.4906	14.2335	22.6945	22.7061	1.35395	6.32365	0.66581	11.1473	7.29763	STAG3	protein_coding
891	ENSECAG00000012908	64.8951	0.669755	0.339985	1.96995	0.0488438	0.771127	102.632	81.5935	51.0035	108.933	56.1676	41.9723	25.2946	51.9332	67.9988	61.4217	NOL9	protein_coding
892	ENSECAG00000013226	204.161	0.436107	0.222666	1.95857	0.0501629	0.771127	330.056	244.781	185.036	206.52	210.33	129.979	147.973	170.447	227.963	188.522	ZDHHC6	protein_coding
893	ENSECAG00000013324	954.331	0.326596	0.166383	1.96291	0.0496563	0.771127	1132.45	1205.25	1131.57	944.089	899.877	729.777	712.043	710.419	1023.33	1054.51	TXN	protein_coding
894	ENSECAG00000013977	6.85735	1.7364	0.886593	1.95851	0.0501701	0.771127	8.16394	8.15935	17.7919	3.40417	15.5357	0	5.05892	1.99743	7.24577	1.21627	MOK	protein_coding
895	ENSECAG00000014746	20.4442	-0.901948	0.459882	-1.96126	0.0498487	0.771127	10.4965	11.6562	10.6751	21.5597	16.7308	33.8487	21.5004	22.6375	20.0652	35.2719	DEPDC5	protein_coding
896	ENSECAG00000015262	97.6607	-0.49715	0.252981	-1.96516	0.0493954	0.771127	81.6394	60.6123	91.3318	70.3528	101.58	106.962	106.237	151.805	120.949	85.139	FOXO4	protein_coding
897	ENSECAG00000016926	79.1983	-0.477023	0.242539	-1.96679	0.0492073	0.771127	50.1499	68.7717	60.4925	66.9486	84.849	101.546	80.9427	89.2185	94.195	94.8691	GABPB1	protein_coding
898	ENSECAG00000017926	58.9883	-0.658417	0.335204	-1.96423	0.0495036	0.771127	33.822	31.4718	45.0728	46.5236	70.5083	102.9	91.0606	60.5887	56.8514	51.0834	TROAP	protein_coding
899	ENSECAG00000018683	401.893	-0.398915	0.202111	-1.97374	0.048411	0.771127	254.248	284.412	385.491	364.246	443.366	515.853	512.216	545.964	362.846	350.286	PCF11	protein_coding
900	ENSECAG00000020161	3.08808	-3.55884	1.81364	-1.96226	0.0497317	0.771127	0	1.16562	0	1.13472	0	18.9552	1.26473	0	8.3605	0	CCNI	protein_coding
901	ENSECAG00000020958	34.1605	0.867565	0.441361	1.96566	0.0493381	0.771127	51.3162	31.4718	55.748	46.5236	37.0467	21.6631	7.58838	28.6298	44.5894	17.0278	ARL6	protein_coding
902	ENSECAG00000021863	5.92133	2.09171	1.06194	1.9697	0.0488724	0.771127	16.3279	1.16562	16.6058	5.67361	8.36539	2.70789	0	5.32648	0	3.04068	PAQR9	protein_coding
903	ENSECAG00000021982	7.76921	-2.34304	1.19372	-1.9628	0.0496698	0.771127	9.33021	0	1.18613	1.13472	1.19506	13.5395	1.26473	26.6324	23.4094	0	THAP12	protein_coding
904	ENSECAG00000022890	2.15722	-3.69057	1.87752	-1.96567	0.0493373	0.771127	0	0	1.18613	0	0	1.35395	0	2.66324	0.557367	15.8115	NEFL	protein_coding
905	ENSECAG00000024126	340.125	-0.316104	0.160353	-1.9713	0.048689	0.771127	293.902	265.762	328.557	330.204	293.984	446.802	408.508	320.255	387.927	325.352	RFC1	protein_coding
906	ENSECAG00000024402	173.573	0.499078	0.254703	1.95945	0.0500602	0.771127	143.452	278.584	141.149	190.633	264.107	93.4223	158.091	147.144	141.571	177.576	WASHC5	protein_coding
907	ENSECAG00000026834	553.016	0.308383	0.157419	1.959	0.0501133	0.771127	686.937	683.055	587.133	575.304	530.605	408.892	455.303	451.419	604.186	547.322	TMEM167A	protein_coding
908	ENSECAG00000029287	24.9211	1.049	0.532187	1.97112	0.0487107	0.771127	22.1593	39.6312	66.4231	23.8292	16.7308	8.12368	15.1768	11.9846	11.7047	33.4474	HOPX	protein_coding
909	ENSECAG00000036888	2.62538	3.70467	1.88868	1.96152	0.0498189	0.771127	0	0	7.11676	5.67361	10.7555	2.70789	0	0	0	0	OR10AL40	protein_coding
910	ENSECAG00000042569	26.7878	-1.31245	0.667285	-1.96685	0.049201	0.771127	10.4965	23.3124	4.74451	9.07778	28.6813	116.439	12.6473	28.6298	22.2947	11.5546	0	protein_coding
911	ENSECAG00000046570	3.31636	3.13204	1.59946	1.95819	0.0502076	0.771127	0	4.66249	7.11676	11.3472	5.97528	4.06184	0	0	0	0	0	lncRNA
912	ENSECAG00000049710	6.27646	-2.28881	1.16469	-1.96516	0.0493954	0.771127	5.83138	0	4.74451	0	0	13.5395	20.2357	6.6581	11.1473	0.608135	0	lncRNA
913	ENSECAG00000050803	2.48945	3.6236	1.84473	1.9643	0.0494953	0.771127	16.3279	1.16562	3.55838	1.13472	0	2.70789	0	0	0	0	0	lncRNA
914	ENSECAG00000054001	167.596	-0.5813	0.295176	-1.96933	0.0489148	0.771127	73.4754	122.39	141.149	172.478	160.138	245.064	298.476	103.866	198.98	159.94	0	lncRNA
915	ENSECAG00000054915	12.8942	-1.71159	0.872835	-1.96096	0.049884	0.771127	11.6628	5.82811	10.6751	1.13472	1.19506	5.41578	1.26473	33.2905	45.7041	12.7708	0	lncRNA
916	ENSECAG00000054926	10.7751	2.14067	1.08845	1.96672	0.0492151	0.771127	31.4895	9.32498	3.55838	34.0417	8.36539	2.70789	17.7062	0	0.557367	0	CCDC62	protein_coding
917	ENSECAG00000057449	7.64744	2.19879	1.11921	1.96459	0.0494615	0.771127	1.16628	4.66249	7.11676	26.0986	22.7061	12.1855	1.26473	0.66581	0	0.608135	TXK	protein_coding
918	ENSECAG00000001989	72.2445	-0.894182	0.456963	-1.95679	0.050372	0.772136	131.789	45.4593	37.9561	14.7514	22.7061	81.2368	111.296	115.851	64.0972	97.3017	SESN2	protein_coding
919	ENSECAG00000010482	513.621	-0.434608	0.222193	-1.95599	0.050466	0.772136	305.564	405.636	546.805	507.221	418.27	614.692	607.07	864.221	385.698	481.035	CCDC186	protein_coding
920	ENSECAG00000011657	155.857	-0.437874	0.223901	-1.95566	0.0505056	0.772136	96.801	107.237	193.339	138.436	125.481	186.845	199.827	149.807	178.357	182.441	HEXB	protein_coding
921	ENSECAG00000018906	705.517	-0.576966	0.295078	-1.9553	0.0505474	0.772136	366.211	642.258	680.837	526.511	613.064	1122.42	1373.5	896.846	476.549	356.975	ZNF292	protein_coding
922	ENSECAG00000019673	84.6915	0.577297	0.295095	1.95631	0.0504292	0.772136	83.9719	79.2623	150.638	102.125	90.8243	48.7421	96.1195	65.9152	82.4903	46.8264	WDR11	protein_coding
923	ENSECAG00000033467	323.647	0.39237	0.200888	1.95317	0.0507991	0.774302	492.169	314.718	353.466	346.09	332.226	207.154	308.594	242.355	374.551	265.147	REELD1	protein_coding
924	ENSECAG00000047198	16.5397	1.4435	0.738889	1.95361	0.0507471	0.774302	8.16394	34.9687	24.9087	46.5236	7.17034	0	8.85311	9.32134	20.6226	4.86508	0	lncRNA
925	ENSECAG00000002544	1257.89	0.238317	0.122064	1.9524	0.050891	0.774864	1435.69	1392.92	1314.23	1391.17	1277.51	1016.81	1091.46	1224.42	1345.48	1089.17	PCBP1	protein_coding
926	ENSECAG00000012150	12.0975	-1.40736	0.721324	-1.95108	0.0510479	0.776413	8.16394	11.6562	0	4.53889	8.36539	24.371	31.6183	12.6504	11.7047	7.90576	SHROOM2	protein_coding
927	ENSECAG00000007945	195.666	0.432004	0.221909	1.94676	0.0515639	0.777473	313.728	238.953	156.569	208.789	207.94	129.979	149.238	171.113	210.685	169.67	TMEM131	protein_coding
928	ENSECAG00000012109	29.9665	-1.25851	0.646284	-1.9473	0.0514985	0.777473	1.16628	36.1343	4.74451	11.3472	34.6566	39.2644	80.9427	18.6427	42.3599	30.4068	SOSTDC1	protein_coding
929	ENSECAG00000015935	12279.2	0.32406	0.166694	1.94404	0.0518904	0.777473	9517.98	17501.8	14609.5	14268	12367.6	10808.6	8447.13	10947.9	11696.3	12626.7	ACTB	protein_coding
930	ENSECAG00000018479	10.7394	-1.66482	0.855785	-1.94538	0.0517297	0.777473	15.1616	8.15935	2.37225	0	0	12.1855	25.2946	12.6504	13.9342	17.6359	PREX2	protein_coding
931	ENSECAG00000018948	17712.5	-0.521036	0.267816	-1.9455	0.0517151	0.777473	9227.58	13366.2	16394.6	19069	14686	19048.7	8409.19	35006.3	19334.5	22582.5	HSP90AA1	protein_coding
932	ENSECAG00000022843	559.71	-0.382218	0.196031	-1.94979	0.0512017	0.777473	363.878	503.549	494.615	573.035	495.948	671.557	451.509	898.844	598.055	546.106	ZC3H13	protein_coding
933	ENSECAG00000023923	4.75162	1.70833	0.878522	1.94455	0.0518292	0.777473	3.49883	5.82811	9.48902	9.07778	8.36539	1.35395	3.79419	2.66324	2.22947	1.21627	STAC3	protein_coding
934	ENSECAG00000024559	323.189	-0.364862	0.187585	-1.94505	0.0517692	0.777473	243.752	306.559	296.532	298.432	264.107	427.847	462.891	352.214	320.486	259.066	CREBRF	protein_coding
935	ENSECAG00000028747	5.51418	2.78148	1.42756	1.94841	0.0513653	0.777473	0	2.33124	13.0474	3.40417	28.6813	1.35395	6.32365	0	0	0	0	lncRNA
936	ENSECAG00000044439	9.63917	2.47868	1.27478	1.9444	0.0518477	0.777473	4.66511	0	45.0728	21.5597	9.56045	5.41578	10.1178	0	0	0	0	lncRNA
937	ENSECAG00000051417	35.8423	-1.15739	0.594997	-1.94521	0.0517499	0.777473	5.83138	3.49687	43.8867	21.5597	35.8517	31.1408	106.237	52.599	26.1962	31.623	BEND5	protein_coding
938	ENSECAG00000057834	50.1686	-0.88529	0.454679	-1.94707	0.0515268	0.777473	48.9836	44.2936	35.5838	26.0986	20.316	73.1131	117.62	35.2879	19.5078	80.882	0	protein_coding
939	ENSECAG00000057905	7.06386	2.30762	1.18457	1.94807	0.0514064	0.777473	8.16394	8.15935	4.74451	5.67361	31.0715	2.70789	10.1178	0	0	0	0	protein_coding
940	ENSECAG00000059384	119.864	-0.450883	0.23151	-1.94758	0.0514653	0.777473	80.4731	71.1029	128.102	114.607	111.14	167.889	136.591	139.82	124.85	124.06	0	protein_coding
941	ENSECAG00000019147	314.739	0.376581	0.193758	1.94356	0.0519485	0.777517	250.749	425.452	456.659	326.8	319.08	301.93	217.534	276.977	294.29	277.918	CORO1C	protein_coding
942	ENSECAG00000014984	994.943	-0.405894	0.208953	-1.94251	0.0520752	0.778586	521.326	939.491	960.763	941.82	913.023	1314.68	1577.12	984.733	980.966	815.51	PGK1	protein_coding
943	ENSECAG00000001005	7.22904	1.69812	0.874944	1.94084	0.0522779	0.779681	24.4918	8.15935	8.30289	10.2125	4.78022	1.35395	0	8.65553	3.90157	2.43254	MEIOB	protein_coding
944	ENSECAG00000008131	86.2405	-0.546792	0.281852	-1.94	0.0523802	0.779681	48.9836	87.4217	75.9121	51.0625	86.044	116.439	130.267	75.2365	112.588	78.4495	ITPR2	protein_coding
945	ENSECAG00000008665	121.79	-0.485796	0.250459	-1.93962	0.0524253	0.779681	113.129	73.4342	132.846	119.146	68.1182	128.625	180.856	134.494	117.047	150.209	FOXJ3	protein_coding
946	ENSECAG00000009173	5.07364	-1.97266	1.01658	-1.94048	0.0523219	0.779681	2.33255	1.16562	3.55838	3.40417	0	1.35395	5.05892	5.99229	14.4915	13.379	ZNF367	protein_coding
947	ENSECAG00000012918	35.4877	-0.896817	0.46202	-1.94108	0.0522487	0.779681	20.993	31.4718	8.30289	45.3889	17.9258	58.2197	25.2946	40.6144	70.7856	35.88	ZNF704	protein_coding
948	ENSECAG00000018853	106.281	0.831075	0.428589	1.9391	0.0524894	0.779811	33.822	262.265	129.288	130.493	125.481	67.6973	46.795	107.861	122.621	36.4881	ACTG2	protein_coding
949	ENSECAG00000006022	59.3433	0.585268	0.302016	1.93787	0.0526389	0.780086	78.1405	66.4405	49.8173	91.9126	70.5083	54.1578	27.8241	59.9229	48.4909	46.2183	TMEM104	protein_coding
950	ENSECAG00000008859	34.9139	0.853246	0.440358	1.93762	0.0526695	0.780086	19.8267	34.9687	75.9121	53.332	41.827	13.5395	20.2357	29.2956	20.0652	40.1369	FBLN2	protein_coding
951	ENSECAG00000055802	32.9941	-0.948571	0.489564	-1.93758	0.0526741	0.780086	12.829	15.1531	26.0948	41.9847	16.7308	39.2644	29.0888	92.5476	30.0978	26.1498	ABRAXAS1	protein_coding
952	ENSECAG00000005447	46.9172	-0.687162	0.354814	-1.93668	0.0527843	0.780156	40.8197	37.2999	28.467	54.4667	17.9258	58.2197	78.4133	59.2571	52.9499	41.3532	GUCY1A1	protein_coding
953	ENSECAG00000006544	201.938	-0.460619	0.237919	-1.93604	0.0528634	0.780156	228.59	150.365	176.733	133.897	158.942	293.806	232.71	307.604	168.882	167.845	MGA	protein_coding
954	ENSECAG00000009688	110.198	0.505528	0.261342	1.93435	0.0530696	0.780156	170.276	139.875	94.8902	155.457	87.2391	90.7144	68.2954	82.5604	115.375	97.3017	DDX41	protein_coding
955	ENSECAG00000012822	103.05	0.593581	0.306984	1.93359	0.0531633	0.780156	171.443	85.0904	113.868	125.954	124.286	78.5289	56.9129	139.82	51.2778	83.3146	EIF3K	protein_coding
956	ENSECAG00000017203	492.606	0.350222	0.180976	1.93519	0.0529669	0.780156	577.307	663.239	613.228	455.024	454.121	354.734	418.626	461.406	563.498	364.881	BTG2	protein_coding
957	ENSECAG00000033171	6.71039	2.04605	1.05823	1.93348	0.0531774	0.780156	13.9953	36.1343	1.18613	1.13472	1.19506	4.06184	3.79419	2.66324	1.11473	1.82441	PIDD1	protein_coding
958	ENSECAG00000035614	2.2036	4.18977	2.16349	1.93658	0.0527966	0.780156	0	0	5.93064	14.7514	0	1.35395	0	0	0	0	0	lncRNA
959	ENSECAG00000043590	127.397	-0.471932	0.243852	-1.93532	0.0529505	0.780156	95.6347	159.69	92.5179	74.8917	109.945	150.288	185.915	138.488	124.293	142.304	PJA1	protein_coding
960	ENSECAG00000046136	3.79727	3.36797	1.7413	1.93417	0.0530928	0.780156	0	0	15.4197	6.80834	11.9506	0	3.79419	0	0	0	0	lncRNA
961	ENSECAG00000039438	3232.88	0.221938	0.114815	1.93301	0.0532354	0.780194	3509.33	4022.56	3314.04	3169.28	3389.18	2950.25	3180.8	2633.28	3021.49	3138.59	MYL6	protein_coding
962	ENSECAG00000008915	205.934	0.407575	0.210994	1.93169	0.0533975	0.780945	159.78	236.621	245.528	239.427	295.179	165.181	134.061	173.111	220.717	189.738	CHD1L	protein_coding
963	ENSECAG00000011128	75.6234	-0.62651	0.324271	-1.93206	0.0533526	0.780945	39.6534	43.128	81.8428	45.3889	87.2391	59.5736	135.326	83.2263	84.1624	96.6935	FBXL3	protein_coding
964	ENSECAG00000011344	15.6988	-1.54344	0.799972	-1.92937	0.0536855	0.784343	0	0	15.4197	7.94306	16.7308	20.3092	30.3535	28.6298	7.80314	29.7986	GABRA3	protein_coding
965	ENSECAG00000006719	27.6934	0.964539	0.501336	1.92394	0.0543623	0.785271	36.1546	22.1468	53.3757	20.425	50.1924	10.8316	39.2066	19.9743	16.721	7.90576	CLCN2	protein_coding
966	ENSECAG00000016972	62.2523	-0.648214	0.336723	-1.92507	0.054221	0.785271	37.3209	48.9561	37.9561	73.757	44.2171	41.9723	120.149	80.563	64.6546	72.9763	SMPD2	protein_coding
967	ENSECAG00000016982	1577.06	-0.243935	0.126721	-1.92498	0.0542325	0.785271	1337.72	1430.22	1528.92	1615.85	1309.78	1601.72	1537.91	2034.05	1657.05	1717.37	CCT4	protein_coding
968	ENSECAG00000017222	102.171	0.545577	0.283412	1.92503	0.0542252	0.785271	108.464	132.881	83.0289	139.571	143.407	90.7144	46.795	121.177	66.884	88.7878	LMF1	protein_coding
969	ENSECAG00000020699	5215.98	-0.378968	0.196657	-1.92705	0.0539736	0.785271	5244.75	5404.99	3713.76	3754.8	4553.16	5798.95	8762.05	4202.59	6272.61	4452.16	PABPC1	protein_coding
970	ENSECAG00000021453	14.6132	-1.22976	0.638338	-1.9265	0.0540415	0.785271	1.16628	9.32498	14.2335	11.3472	7.17034	29.7868	31.6183	7.98972	19.5078	13.9871	TICRR	protein_coding
971	ENSECAG00000023764	214.472	0.346122	0.179568	1.92752	0.0539144	0.785271	190.103	237.787	259.762	291.624	221.085	208.508	168.209	171.779	200.652	195.211	GRK5	protein_coding
972	ENSECAG00000025610	9.78595	-1.85632	0.964662	-1.92433	0.0543137	0.785271	1.16628	1.16562	14.2335	4.53889	0	29.7868	10.1178	5.99229	28.4257	2.43254	SNORD113-7	snoRNA
973	ENSECAG00000046589	2.26805	3.47488	1.80485	1.9253	0.0541916	0.785271	8.16394	3.49687	7.11676	0	1.19506	2.70789	0	0	0	0	0	lncRNA
974	ENSECAG00000052068	4.95718	2.36524	1.22914	1.9243	0.0543171	0.785271	9.33021	5.82811	4.74451	14.7514	5.97528	1.35395	7.58838	0	0	0	0	lncRNA
975	ENSECAG00000053488	2.28675	3.49228	1.81135	1.928	0.053855	0.785271	1.16628	1.16562	1.18613	0	16.7308	1.35395	1.26473	0	0	0	0	protein_coding
976	ENSECAG00000015930	306.476	0.398797	0.207365	1.92317	0.0544592	0.785864	482.839	331.037	252.645	382.402	296.374	234.233	208.68	253.674	325.502	297.378	TSN	protein_coding
977	ENSECAG00000005241	103.387	0.780917	0.406325	1.9219	0.054618	0.787349	293.902	94.4154	43.8867	128.224	94.4094	37.9105	68.2954	90.5502	88.6213	93.6529	THBD	protein_coding
978	ENSECAG00000008628	207.579	0.383445	0.199661	1.92047	0.054798	0.789136	277.574	213.309	270.437	177.017	235.426	166.535	231.446	147.81	188.39	167.845	TSPAN6	protein_coding
979	ENSECAG00000020061	2.4476	-4.48712	2.33836	-1.91892	0.0549945	0.789359	0	0	0	0	0	6.76973	17.7062	0	0	0	CIB4	protein_coding
980	ENSECAG00000020432	77.904	-0.720726	0.375507	-1.91934	0.0549411	0.789359	48.9836	81.5935	53.3757	72.6223	35.8517	134.041	166.944	58.5913	80.8182	46.2183	CPD	protein_coding
981	ENSECAG00000047772	904.197	-0.314498	0.163846	-1.91947	0.054925	0.789359	591.302	749.495	845.709	787.498	1055.23	1083.16	1044.67	939.458	1094.67	850.781	TCAF1	protein_coding
982	ENSECAG00000055489	30.83	1.45404	0.757874	1.91858	0.0550377	0.789359	45.4848	15.1531	92.5179	15.8861	57.3627	12.1855	5.05892	37.2854	0	27.3661	C18H2orf88	protein_coding
983	ENSECAG00000012886	69.799	0.543975	0.283918	1.91596	0.05537	0.792511	92.1359	108.403	78.2844	73.757	63.338	47.3881	37.9419	64.5836	57.9662	74.1925	SPG21	protein_coding
984	ENSECAG00000016416	55.1285	0.609293	0.31796	1.91626	0.0553322	0.792511	85.1382	61.778	81.8428	37.4459	68.1182	37.9105	32.883	40.6144	49.6057	55.9485	LIG3	protein_coding
985	ENSECAG00000047345	2.38066	3.55535	1.85613	1.91546	0.055434	0.792621	3.49883	0	15.4197	2.26945	0	1.35395	1.26473	0	0	0	0	lncRNA
986	ENSECAG00000015966	2306.83	0.309779	0.162026	1.9119	0.0558886	0.794526	2281.24	3128.53	2182.47	2320.51	2858.57	1735.76	1869.27	1838.3	2735.56	2118.14	SERPINB6	protein_coding
987	ENSECAG00000018307	32.4458	-0.882976	0.461916	-1.91155	0.055934	0.794526	17.4941	41.9624	20.1642	27.2333	7.17034	55.5118	26.5593	48.6041	52.3925	27.3661	TNIK	protein_coding
988	ENSECAG00000018519	18.3329	-1.07965	0.564396	-1.91294	0.0557564	0.794526	11.6628	6.99373	14.2335	17.0208	8.36539	24.371	48.0597	25.9666	7.80314	18.8522	FANCD2	protein_coding
989	ENSECAG00000019037	159.898	-0.442898	0.231471	-1.91341	0.0556956	0.794526	107.297	155.028	135.218	113.472	164.918	211.216	239.034	125.172	189.505	158.115	GSTA4	protein_coding
990	ENSECAG00000025174	212.78	-0.452924	0.236883	-1.91202	0.0558738	0.794526	267.077	142.206	204.014	115.742	169.698	227.463	250.417	239.692	313.24	198.252	HS3ST3B1	protein_coding
991	ENSECAG00000028129	406.561	-0.417836	0.21861	-1.91133	0.0559621	0.794526	307.897	469.746	373.63	287.085	299.959	494.19	636.159	354.877	316.027	526.037	0	protein_coding
992	ENSECAG00000045113	15.2749	1.25484	0.656511	1.91138	0.055956	0.794526	16.3279	24.4781	14.2335	18.1556	33.4616	14.8934	13.912	0.66581	4.45894	12.1627	0	lncRNA
993	ENSECAG00000051521	2.43867	-4.48221	2.34682	-1.9099	0.0561456	0.796328	0	0	0	0	0	5.41578	18.971	0	0	0	0	protein_coding
994	ENSECAG00000019161	123.09	-0.559353	0.293148	-1.90809	0.0563797	0.798845	78.1405	102.575	84.215	121.415	108.75	222.047	197.298	133.828	98.0966	84.5308	DIAPH3	protein_coding
995	ENSECAG00000026875	28.5376	1.06374	0.557761	1.90717	0.0564988	0.799727	45.4848	38.4655	52.1896	18.1556	39.4369	24.371	0	26.6324	21.1799	19.4603	ARL16	protein_coding
996	ENSECAG00000034201	2.13746	4.14079	2.17195	1.90649	0.0565865	0.800165	0	8.15935	11.8613	0	0	1.35395	0	0	0	0	0	lncRNA
997	ENSECAG00000000229	112.709	0.699594	0.368388	1.89907	0.0575558	0.800301	74.6417	92.0841	310.765	118.011	102.775	52.8039	103.708	69.9101	114.818	87.5715	GNAI1	protein_coding
998	ENSECAG00000000410	204.906	0.456737	0.240743	1.8972	0.057802	0.800301	246.084	217.971	300.09	207.654	216.305	111.024	165.68	127.836	256.946	199.468	GLT8D1	protein_coding
999	ENSECAG00000001034	6.2734	2.60382	1.36902	1.90195	0.0571771	0.800301	0	15.1531	30.8393	5.67361	2.39011	1.35395	0	7.32391	0	0	UNC45B	protein_coding
1000	ENSECAG00000004006	97.8173	0.667814	0.353099	1.8913	0.058585	0.800301	104.965	167.85	138.777	107.799	82.4589	85.2986	21.5004	65.9152	88.064	115.546	CDK5R1	protein_coding
1001	ENSECAG00000007518	52.7145	-0.7752	0.406852	-1.90536	0.0567334	0.800301	39.6534	72.2686	33.2116	29.5028	19.1209	105.608	51.8539	79.8972	33.9994	62.0298	MARCHF3	protein_coding
1002	ENSECAG00000007824	475.951	0.323639	0.169914	1.90472	0.0568159	0.800301	654.281	571.155	397.353	515.164	509.094	391.29	407.243	355.543	494.384	464.007	SNRPD2	protein_coding
1003	ENSECAG00000008105	14.9583	1.18447	0.623353	1.90017	0.0574112	0.800301	40.8197	17.4843	15.4197	9.07778	21.511	9.47762	3.79419	16.6453	11.7047	3.64881	SEC61A2	protein_coding
1004	ENSECAG00000008498	87.7423	-0.625577	0.329102	-1.90086	0.0573199	0.800301	58.3138	92.0841	85.4011	28.3681	80.0688	104.254	158.091	104.532	96.9818	69.3274	NEMP2	protein_coding
1005	ENSECAG00000009669	228.102	0.370041	0.195375	1.894	0.0582246	0.800301	272.909	319.38	265.692	262.121	167.308	180.075	180.856	216.388	210.127	206.158	GRPEL1	protein_coding
1006	ENSECAG00000009897	37.4953	0.72348	0.382396	1.89197	0.0584956	0.800301	66.4778	37.2999	52.1896	19.2903	58.5577	27.0789	26.5593	27.2982	26.7536	33.4474	CIPC	protein_coding
1007	ENSECAG00000010493	319.69	0.446772	0.234679	1.90376	0.0569418	0.800301	456.014	377.662	335.674	397.153	280.838	247.772	136.591	293.622	351.699	319.879	ENTPD4	protein_coding
1008	ENSECAG00000010698	7.73478	-1.86062	0.977959	-1.90256	0.0570981	0.800301	0	0	3.55838	1.13472	11.9506	18.9552	15.1768	6.6581	15.0489	4.86508	QRFPR	protein_coding
1009	ENSECAG00000010723	120.269	0.418285	0.221085	1.89197	0.0584953	0.800301	124.792	148.034	97.2624	165.67	151.772	116.439	93.59	92.5476	96.4245	116.154	ANGEL2	protein_coding
1010	ENSECAG00000013070	71.1703	-0.538307	0.283333	-1.89991	0.0574446	0.800301	52.4824	55.9499	69.9815	69.2181	43.022	62.2815	98.6489	63.252	108.687	88.1796	DAGLB	protein_coding
1011	ENSECAG00000013629	48.9071	-0.786466	0.414593	-1.89696	0.057833	0.800301	16.3279	18.65	48.6312	29.5028	65.7281	90.7144	67.0307	53.2648	39.0157	60.2054	ADD3	protein_coding
1012	ENSECAG00000013901	697.745	-0.386624	0.204252	-1.89288	0.0583739	0.800301	422.192	486.064	731.84	592.325	792.322	802.89	669.042	1089.93	740.741	650.097	ANKRD12	protein_coding
1013	ENSECAG00000016016	65.9914	0.658757	0.347311	1.89673	0.0578632	0.800301	111.963	46.6249	84.215	51.0625	111.14	29.7868	56.9129	64.5836	64.0972	39.5288	GNPDA2	protein_coding
1014	ENSECAG00000016392	377.157	-0.341257	0.179339	-1.90286	0.0570585	0.800301	333.555	338.03	328.557	360.842	298.764	548.348	503.363	336.234	378.452	345.421	RAD21	protein_coding
1015	ENSECAG00000017246	157.829	0.377114	0.198613	1.89874	0.0575993	0.800301	157.447	184.168	156.569	196.307	197.184	157.058	115.09	124.506	121.506	168.454	PPP1R7	protein_coding
1016	ENSECAG00000017611	4.55412	2.72473	1.43236	1.90227	0.0571363	0.800301	2.33255	13.9875	17.7919	2.26945	2.39011	6.76973	0	0	0	0	C8H18orf63	protein_coding
1017	ENSECAG00000019343	28.0937	-1.17083	0.614359	-1.90578	0.0566786	0.800301	5.83138	4.66249	52.1896	10.2125	13.1456	46.0342	68.2954	18.6427	34.5567	27.3661	ALDH1A1	protein_coding
1018	ENSECAG00000021295	248.484	0.515492	0.27235	1.89276	0.0583899	0.800301	525.991	329.871	228.923	203.115	174.478	176.013	223.857	173.111	219.603	229.875	SHMT2	protein_coding
1019	ENSECAG00000021897	29.8592	0.818572	0.431436	1.89732	0.0577854	0.800301	66.4778	22.1468	45.0728	23.8292	33.4616	18.9552	20.2357	14.6478	23.9668	29.7986	EVC2	protein_coding
1020	ENSECAG00000024454	2.79642	2.58511	1.36016	1.90059	0.0573563	0.800301	5.83138	1.16562	9.48902	4.53889	2.39011	1.35395	2.52946	0.66581	0	0	TENM2	protein_coding
1021	ENSECAG00000025526	4.1199	2.99899	1.58501	1.8921	0.0584781	0.800301	0	11.6562	13.0474	11.3472	0	1.35395	3.79419	0	0	0	U6	snRNA
1022	ENSECAG00000034886	129.83	0.523672	0.275979	1.89751	0.0577613	0.800301	185.438	97.9123	212.317	149.783	120.701	71.7591	135.326	114.519	132.096	78.4495	SPTSSA	protein_coding
1023	ENSECAG00000044907	2.33124	4.93825	2.60462	1.89596	0.0579656	0.800301	0	23.3124	0	0	0	0	0	0	0	0	0	protein_coding
1024	ENSECAG00000046100	4.21344	2.6235	1.38689	1.89164	0.0585393	0.800301	1.16628	1.16562	13.0474	4.53889	15.5357	5.41578	1.26473	0	0	0	0	protein_coding
1025	ENSECAG00000046449	4.3229	-2.64341	1.39483	-1.89514	0.0580732	0.800301	1.16628	0	0	0	4.78022	20.3092	0	9.32134	2.78683	4.86508	0	lncRNA
1026	ENSECAG00000049944	2.33927	-4.44641	2.34576	-1.89551	0.0580249	0.800301	0	0	0	0	0	5.41578	0	17.9769	0	0	0	lncRNA
1027	ENSECAG00000050323	21.6453	-1.1959	0.629564	-1.89957	0.0574898	0.800301	33.822	3.49687	16.6058	6.80834	4.78022	27.0789	49.3245	42.6118	16.721	15.2034	0	lncRNA
1028	ENSECAG00000054619	6.23767	2.67371	1.41138	1.8944	0.0581724	0.800301	0	1.16562	3.55838	32.907	15.5357	5.41578	3.79419	0	0	0	0	lncRNA
1029	ENSECAG00000054732	100.601	0.494623	0.26142	1.89207	0.0584823	0.800301	132.956	129.384	88.9595	154.322	83.6539	70.4052	77.1485	95.8766	66.884	106.424	0	lncRNA
1030	ENSECAG00000057583	16.5107	2.72255	1.43437	1.89808	0.057685	0.800301	27.9906	15.1531	36.7699	56.7361	5.97528	14.8934	7.58838	0	0	0	FMO3	protein_coding
1031	ENSECAG00000058720	3.8988	2.93813	1.54749	1.89864	0.0576124	0.800301	3.49883	0	13.0474	10.2125	7.17034	0	5.05892	0	0	0	0	lncRNA
1032	ENSECAG00000018569	165.191	0.458474	0.242594	1.88988	0.0587739	0.802105	186.604	216.806	163.686	215.597	174.478	163.827	77.1485	160.46	111.473	181.832	LETM1	protein_coding
1033	ENSECAG00000009140	16.6693	-1.22784	0.649853	-1.88941	0.0588375	0.802196	9.33021	6.99373	0	20.425	13.1456	31.1408	10.1178	27.2982	24.5241	23.7173	KLHL25	protein_coding
1034	ENSECAG00000014772	3.45224	3.15874	1.67238	1.88877	0.0589227	0.802579	3.49883	18.65	7.11676	0	1.19506	4.06184	0	0	0	0	CDH7	protein_coding
1035	ENSECAG00000020724	875.17	-0.268108	0.141989	-1.88824	0.0589941	0.802776	656.614	826.426	727.096	882.814	877.171	1058.79	847.369	1076.61	941.95	856.863	TPR	protein_coding
1036	ENSECAG00000020946	24.5719	-1.12578	0.596689	-1.88671	0.0591987	0.804783	1.16628	19.8156	8.30289	29.5028	17.9258	44.6802	49.3245	38.617	14.4915	21.8929	SUGCT	protein_coding
1037	ENSECAG00000021409	397.965	0.305619	0.162025	1.88625	0.0592619	0.804865	346.384	441.771	404.469	450.485	556.896	320.885	388.272	382.841	348.912	338.731	0	protein_coding
1038	ENSECAG00000009436	118.346	0.644023	0.341568	1.88549	0.0593638	0.805472	159.78	88.5873	117.427	199.711	157.747	104.254	27.8241	82.5604	121.506	124.06	HCCS	protein_coding
1039	ENSECAG00000008634	46.8706	-0.823271	0.436991	-1.88395	0.0595711	0.807507	13.9953	31.4718	21.3503	40.85	60.9479	86.6525	61.9718	76.5682	25.6389	49.259	NCAPH	protein_coding
1040	ENSECAG00000006343	256.885	-0.428711	0.227873	-1.88136	0.0599234	0.807623	279.906	261.099	252.645	175.882	126.676	236.941	275.711	352.214	331.076	276.702	L3MBTL3	protein_coding
1041	ENSECAG00000008089	8.43672	-2.04112	1.08451	-1.88206	0.0598282	0.807623	1.16628	0	2.37225	7.94306	4.78022	23.0171	31.6183	3.99486	9.47524	0	RASL10B	protein_coding
1042	ENSECAG00000010159	40.2844	0.64729	0.34384	1.88253	0.0597639	0.807623	60.6464	44.2936	43.8867	51.0625	46.6072	36.5565	16.4415	40.6144	25.6389	37.0963	SPAST	protein_coding
1043	ENSECAG00000013153	167.254	0.44671	0.237279	1.88264	0.0597498	0.807623	155.115	229.628	207.572	181.556	193.599	92.0683	125.208	187.758	184.488	115.546	KLF10	protein_coding
1044	ENSECAG00000013582	47.253	-1.06322	0.56526	-1.88093	0.0599811	0.807623	18.6604	32.6374	32.0254	13.6167	54.9726	92.0683	154.297	29.9615	14.4915	29.7986	DHRS3	protein_coding
1045	ENSECAG00000016545	15.2761	1.21646	0.646619	1.88126	0.0599366	0.807623	29.1569	37.2999	26.0948	5.67361	8.36539	10.8316	10.1178	3.32905	6.6884	15.2034	SDK1	protein_coding
1046	ENSECAG00000052727	15.6484	-1.71723	0.912553	-1.88179	0.0598649	0.807623	2.33255	2.33124	16.6058	11.3472	3.58517	59.5736	25.2946	8.65553	0	26.758	0	lncRNA
1047	ENSECAG00000006890	58.4899	-1.04956	0.558159	-1.88039	0.0600548	0.807844	25.6581	64.1092	37.9561	32.907	28.6813	148.934	159.356	51.2674	11.7047	24.3254	MAP3K1	protein_coding
1048	ENSECAG00000006883	84.9757	0.555449	0.296027	1.87634	0.0606082	0.808162	75.808	125.887	113.868	116.876	75.2885	56.8657	43.0008	61.2545	76.9166	103.991	ZCCHC7	protein_coding
1049	ENSECAG00000007745	94.4101	0.451326	0.24036	1.87771	0.0604213	0.808162	114.295	97.9123	96.0763	114.607	124.286	79.8828	50.5892	91.8818	93.0803	81.4901	RBM28	protein_coding
1050	ENSECAG00000010022	63.3407	-0.774404	0.412491	-1.87739	0.0604652	0.808162	32.6557	110.734	17.7919	31.7722	40.6319	69.0512	96.1195	93.8792	76.9166	63.8542	CYP17A1	protein_coding
1051	ENSECAG00000011232	22.713	-0.97542	0.519788	-1.87657	0.060577	0.808162	12.829	16.3187	20.1642	13.6167	13.1456	31.1408	51.8539	19.9743	39.5731	8.5139	ZRANB3	protein_coding
1052	ENSECAG00000011434	324.302	0.354785	0.189157	1.87561	0.0607086	0.808162	305.564	426.618	317.882	403.961	366.882	334.425	189.71	299.615	274.225	324.136	DELE1	protein_coding
1053	ENSECAG00000014273	14.7976	1.12886	0.600544	1.87973	0.0601454	0.808162	4.66511	9.32498	30.8393	31.7722	25.0962	8.12368	8.85311	10.653	8.91787	9.73017	ANO8	protein_coding
1054	ENSECAG00000024343	289.333	-0.558763	0.297832	-1.8761	0.0606416	0.808162	211.096	245.946	236.039	191.768	282.033	530.747	561.54	251.676	187.275	195.211	0	protein_coding
1055	ENSECAG00000043401	87.8161	-0.586003	0.312437	-1.87559	0.0607119	0.808162	53.6487	109.568	91.3318	39.7153	56.1676	106.962	135.326	104.532	70.2282	110.681	0	protein_coding
1056	ENSECAG00000044280	7.7602	2.13264	1.1373	1.87519	0.0607671	0.808162	23.3255	4.66249	16.6058	6.80834	10.7555	4.06184	11.3826	0	0	0	0	protein_coding
1057	ENSECAG00000044396	21.5137	-1.57496	0.838777	-1.87769	0.0604235	0.808162	4.66511	16.3187	14.2335	11.3472	7.17034	33.8487	84.7369	0	37.3436	5.47322	0	protein_coding
1058	ENSECAG00000046597	79.7227	0.448938	0.239401	1.87526	0.0607575	0.808162	97.9672	68.7717	109.124	81.7	102.775	69.0512	63.2365	69.9101	63.5398	71.1518	0	protein_coding
1059	ENSECAG00000055198	3.6091	-2.70638	1.4431	-1.87539	0.0607396	0.808162	0	0	2.37225	0	2.39011	13.5395	6.32365	5.99229	0	5.47322	0	lncRNA
1060	ENSECAG00000016940	1534.04	-0.351069	0.187266	-1.87471	0.0608332	0.808279	1168.61	2099.29	1082.93	1141.53	1247.64	1776.38	2047.6	1497.41	1555.61	1723.46	SPON2	protein_coding
1061	ENSECAG00000024622	113	-0.524064	0.279718	-1.87355	0.0609929	0.809636	85.1382	118.893	62.8647	78.2959	117.115	163.827	160.621	94.545	160.522	88.1796	RHOBTB3	protein_coding
1062	ENSECAG00000045421	2.14153	4.14357	2.21253	1.87277	0.0610998	0.810291	0	0	17.7919	2.26945	0	1.35395	0	0	0	0	0	lncRNA
1063	ENSECAG00000003179	51.5491	0.596996	0.318979	1.87158	0.0612644	0.810948	67.644	80.4279	53.3757	52.1973	58.5577	21.6631	37.9419	45.2751	54.622	43.7858	ZNF239	protein_coding
1064	ENSECAG00000016692	607.373	-0.282952	0.151157	-1.87191	0.0612187	0.810948	510.829	483.733	486.312	576.439	679.987	750.086	744.926	610.548	627.595	603.27	H2AZ2	protein_coding
1065	ENSECAG00000016854	703.349	0.795643	0.425356	1.87053	0.0614097	0.812107	269.41	1310.16	933.482	1343.51	607.088	352.026	428.743	452.751	651.562	684.76	ACSL4	protein_coding
1066	ENSECAG00000009893	236.091	-0.406623	0.217555	-1.86906	0.0616145	0.813288	292.735	210.978	196.897	138.436	174.478	295.16	332.624	233.034	232.979	253.592	CDK19	protein_coding
1067	ENSECAG00000046135	2.21577	-3.69676	1.97748	-1.86943	0.0615633	0.813288	0	0	1.18613	0	0	4.06184	7.58838	9.32134	0	0	0	lncRNA
1068	ENSECAG00000015265	3.42147	-2.65762	1.42278	-1.86791	0.0617751	0.814644	4.66511	0	0	0	0	1.35395	12.6473	3.99486	6.6884	4.86508	CCDC81	protein_coding
1069	ENSECAG00000011509	1103.38	0.299876	0.160682	1.86626	0.0620044	0.815061	1695.77	1057.22	1114.96	1165.36	1056.43	949.116	884.046	1085.27	922.442	1103.16	PSMA3	protein_coding
1070	ENSECAG00000013703	71.3043	-0.631474	0.338374	-1.8662	0.0620135	0.815061	34.9883	40.7968	62.8647	62.4098	77.6786	88.0065	127.738	105.864	64.6546	48.0427	PPP1R3C	protein_coding
1071	ENSECAG00000014620	416.674	0.376018	0.201508	1.86602	0.0620381	0.815061	429.19	560.664	329.743	537.859	498.338	356.088	260.534	310.933	463.172	420.222	VARS1	protein_coding
1072	ENSECAG00000017641	93.7557	0.514767	0.275708	1.86707	0.0618916	0.815061	155.115	100.243	110.31	123.685	60.9479	81.2368	93.59	81.8946	69.1135	61.4217	PTPN21	protein_coding
1073	ENSECAG00000019329	165.544	0.646877	0.346745	1.86557	0.0621015	0.815133	89.8033	152.696	346.349	222.406	197.184	136.749	208.68	67.2468	84.7198	149.601	MPP3	protein_coding
1074	ENSECAG00000013895	17.0637	-1.06085	0.568835	-1.86495	0.0621887	0.815517	10.4965	3.49687	23.7225	5.67361	11.9506	24.371	22.7651	14.6478	20.0652	33.4474	ZNF777	protein_coding
1075	ENSECAG00000005577	60.8918	0.865344	0.464445	1.86318	0.0624371	0.815535	23.3255	102.575	110.31	76.0264	82.4589	20.3092	22.7651	63.9178	24.5241	82.7064	GPR39	protein_coding
1076	ENSECAG00000010848	139.332	0.413939	0.222118	1.8636	0.0623779	0.815535	176.108	145.703	163.686	148.649	163.723	127.271	70.8249	140.486	117.604	139.263	RMDN3	protein_coding
1077	ENSECAG00000017864	12.0959	2.00357	1.07576	1.86247	0.0625375	0.815535	1.16628	0	24.9087	23.8292	46.6072	13.5395	0	1.33162	8.3605	1.21627	FMOD	protein_coding
1078	ENSECAG00000018657	24.2542	0.922475	0.495194	1.86286	0.0624824	0.815535	18.6604	41.9624	34.3977	15.8861	48.9973	8.12368	11.3826	27.964	14.4915	20.6766	BSCL2	protein_coding
1079	ENSECAG00000025029	109.36	-0.503831	0.270406	-1.86324	0.0624284	0.815535	62.9789	117.728	79.4705	99.8556	92.0193	181.429	75.8838	127.17	122.063	135.006	C5H1orf52	protein_coding
1080	ENSECAG00000041577	134.149	-0.446821	0.239733	-1.86382	0.0623467	0.815535	156.281	116.562	103.193	108.933	82.4589	129.979	184.651	178.437	113.145	167.845	CCDC167	protein_coding
1081	ENSECAG00000010182	5.98847	-2.40292	1.29276	-1.85875	0.063063	0.818424	2.33255	0	1.18613	0	5.97528	1.35395	29.0888	12.6504	0	7.29763	RGS22	protein_coding
1082	ENSECAG00000011588	28.1608	0.790612	0.425046	1.86006	0.0628766	0.818424	51.3162	46.6249	30.8393	17.0208	33.4616	20.3092	11.3826	25.3008	22.852	22.501	C18H2orf80	protein_coding
1083	ENSECAG00000035845	5.0375	2.86473	1.54117	1.8588	0.063055	0.818424	1.16628	0	21.3503	7.94306	13.1456	6.76973	0	0	0	0	0	lncRNA
1084	ENSECAG00000047610	2.13781	3.38943	1.82352	1.85873	0.0630648	0.818424	1.16628	0	8.30289	3.40417	5.97528	0	2.52946	0	0	0	0	lncRNA
1085	ENSECAG00000052235	116.417	0.597913	0.321452	1.86004	0.06288	0.818424	92.1359	59.4467	196.897	204.25	148.187	108.316	75.8838	89.8844	73.0151	116.154	PCED1B	protein_coding
1086	ENSECAG00000057184	2.14346	3.38133	1.81945	1.85843	0.0631077	0.818424	5.83138	0	1.18613	4.53889	7.17034	2.70789	0	0	0	0	0	lncRNA
1087	ENSECAG00000012085	53.2085	0.635426	0.342039	1.85776	0.0632037	0.818609	83.9719	53.6186	49.8173	59.0056	77.6786	52.8039	26.5593	25.9666	61.3104	41.3532	SWT1	protein_coding
1088	ENSECAG00000014153	151.549	-0.391543	0.210955	-1.85605	0.063446	0.818609	152.782	128.218	129.288	130.493	112.335	216.631	201.092	127.836	160.522	156.291	CLK4	protein_coding
1089	ENSECAG00000022027	4.7418	-1.9987	1.07647	-1.85672	0.0633507	0.818609	4.66511	2.33124	2.37225	0	0	17.6013	5.05892	3.32905	7.80314	4.25695	ALKBH1	protein_coding
1090	ENSECAG00000022315	34.0943	0.719425	0.387477	1.85669	0.0633553	0.818609	64.1452	26.8093	37.9561	53.332	29.8764	24.371	25.2946	33.9563	17.8357	27.3661	BIN3	protein_coding
1091	ENSECAG00000026829	411.727	0.339388	0.182788	1.85673	0.0633492	0.818609	627.457	425.452	410.4	418.713	418.27	342.548	346.536	458.077	290.946	378.868	IER3IP1	protein_coding
1092	ENSECAG00000059596	4.72782	3.13529	1.68938	1.85588	0.0634706	0.818609	0	0	17.7919	19.2903	4.78022	5.41578	0	0	0	0	0	protein_coding
1093	ENSECAG00000016386	12.8479	2.20366	1.18793	1.85504	0.0635909	0.819409	76.9743	4.66249	8.30289	14.7514	1.19506	1.35395	1.26473	19.9743	0	0	STXBP4	protein_coding
1094	ENSECAG00000001999	42.353	0.630391	0.340198	1.85301	0.0638804	0.820561	82.8056	37.2999	37.9561	52.1973	47.8022	28.4329	29.0888	34.6221	36.2288	37.0963	GMDS	protein_coding
1095	ENSECAG00000013495	1086.24	-0.252252	0.136098	-1.85345	0.0638172	0.820561	1071.81	910.351	925.179	1054.16	995.482	1301.14	1066.17	1409.52	1113.62	1014.98	GOLGA4	protein_coding
1096	ENSECAG00000023310	134.207	-0.534378	0.288374	-1.85307	0.063872	0.820561	128.29	109.568	100.821	93.0473	114.725	196.322	222.592	70.5759	124.293	181.832	PEX11G	protein_coding
1097	ENSECAG00000052776	3.71864	2.80478	1.51382	1.85278	0.0639133	0.820561	9.33021	0	15.4197	1.13472	5.97528	4.06184	1.26473	0	0	0	0	lncRNA
1098	ENSECAG00000000135	118.394	-0.522816	0.282484	-1.85078	0.0642012	0.822458	57.1476	109.568	105.565	82.8348	129.066	177.367	185.915	90.5502	110.916	135.006	CDK5RAP2	protein_coding
1099	ENSECAG00000001445	165.676	-0.380036	0.207758	-1.82923	0.0673651	0.822458	181.939	100.243	131.66	154.322	151.772	181.429	187.18	225.71	172.226	170.278	CHD7	protein_coding
1100	ENSECAG00000005393	171.613	-0.463069	0.252807	-1.83171	0.0669949	0.822458	149.283	173.678	145.894	131.628	118.311	259.958	271.917	193.085	114.26	158.115	ATP11C	protein_coding
1101	ENSECAG00000006301	27.806	-1.32812	0.723108	-1.83669	0.0662559	0.822458	1.16628	4.66249	14.2335	35.1764	23.9011	75.821	2.52946	44.6093	33.9994	41.9613	METTL4	protein_coding
1102	ENSECAG00000006392	599.478	-0.301084	0.16423	-1.83331	0.0667563	0.822458	459.513	566.492	527.827	607.077	527.02	648.54	494.509	854.9	658.808	650.097	SEC63	protein_coding
1103	ENSECAG00000006455	570.809	0.325579	0.177971	1.8294	0.0673404	0.822458	828.056	643.423	601.366	573.035	531.8	395.352	459.097	662.481	510.548	502.928	CYP51A1	protein_coding
1104	ENSECAG00000006877	472.201	-0.341295	0.184859	-1.84624	0.0648571	0.822458	332.389	349.687	460.217	476.584	463.682	560.534	508.421	691.111	480.45	398.937	CCDC88A	protein_coding
1105	ENSECAG00000008211	81.1185	0.582504	0.316976	1.83769	0.0661078	0.822458	94.4684	143.372	65.237	105.529	78.8737	43.3263	61.9718	81.2288	42.9173	94.261	ZNF300	protein_coding
1106	ENSECAG00000008326	94.8305	0.415357	0.225412	1.84266	0.0653792	0.822458	130.623	99.0779	103.193	96.4514	113.53	64.9894	84.7369	95.8766	74.6872	85.139	SCAMP4	protein_coding
1107	ENSECAG00000008722	16.6861	-1.1085	0.602517	-1.83978	0.0658012	0.822458	12.829	24.4781	4.74451	6.80834	3.58517	25.725	36.6772	21.3059	16.721	13.9871	CPEB2	protein_coding
1108	ENSECAG00000008730	1460.77	-0.33477	0.181423	-1.84524	0.0650021	0.822458	1051.98	1408.07	1294.06	1354.86	1346.83	2205.58	1940.1	1358.25	1126.44	1521.55	MAP4K4	protein_coding
1109	ENSECAG00000008807	84.3427	-0.745436	0.404426	-1.84319	0.0653008	0.822458	38.4871	55.9499	67.6092	63.5445	88.4341	88.0065	216.269	83.8921	31.7699	109.464	GTF3C5	protein_coding
1110	ENSECAG00000008946	2.76869	2.86162	1.56119	1.83298	0.0668055	0.822458	12.829	5.82811	0	0	5.97528	0	0	1.33162	1.11473	0.608135	0	protein_coding
1111	ENSECAG00000009090	178.728	0.390238	0.212072	1.84013	0.0657499	0.822458	265.911	153.862	156.569	200.846	236.621	177.367	127.738	157.131	148.26	162.98	PGM2	protein_coding
1112	ENSECAG00000009390	3.2447	2.19546	1.1876	1.84865	0.0645082	0.822458	2.33255	9.32498	5.93064	5.67361	3.58517	0	1.26473	2.66324	1.6721	0	SEPTIN1	protein_coding
1113	ENSECAG00000010574	64.646	0.567979	0.307086	1.84958	0.0643748	0.822458	43.1522	80.4279	113.868	82.8348	65.7281	46.0342	60.707	49.2699	61.8677	42.5695	KLHL7	protein_coding
1114	ENSECAG00000010992	11.0911	2.04733	1.11591	1.83467	0.0665546	0.822458	19.8267	0	45.0728	24.9639	0	0	1.26473	6.6581	2.78683	10.3383	NFATC4	protein_coding
1115	ENSECAG00000011590	353.824	0.444078	0.241787	1.83665	0.0662617	0.822458	212.262	621.277	385.491	445.946	375.248	322.239	218.798	296.285	304.322	356.367	FHL3	protein_coding
1116	ENSECAG00000011768	995.369	0.267876	0.146096	1.83356	0.0667192	0.822458	1340.05	1162.13	959.577	1050.75	927.364	881.419	785.397	886.193	1059.55	901.257	BZW1	protein_coding
1117	ENSECAG00000013193	146.029	-0.487241	0.265927	-1.83224	0.066916	0.822458	80.4731	132.881	162.499	161.131	71.7034	129.979	170.739	211.728	162.194	176.967	UHRF1	protein_coding
1118	ENSECAG00000014140	24.2575	1.10056	0.600266	1.83346	0.0667343	0.822458	68.8103	47.7905	18.978	15.8861	14.3407	17.6013	6.32365	13.3162	6.6884	32.8393	NDUFAF7	protein_coding
1119	ENSECAG00000014873	243.778	0.451204	0.246503	1.83042	0.0671867	0.822458	418.693	188.831	232.481	234.888	334.616	180.075	184.651	175.774	299.863	187.914	OAT	protein_coding
1120	ENSECAG00000015079	241.56	-0.456048	0.247109	-1.84553	0.0649601	0.822458	135.288	315.884	173.175	251.908	142.212	304.638	233.975	345.555	270.323	242.646	CRYBG1	protein_coding
1121	ENSECAG00000015127	2.85096	2.91481	1.58798	1.83554	0.0664251	0.822458	18.6604	1.16562	1.18613	1.13472	2.39011	2.70789	1.26473	0	0	0	SLC13A4	protein_coding
1122	ENSECAG00000015540	5.95914	-2.01277	1.08794	-1.85008	0.0643022	0.822458	2.33255	0	2.37225	2.26945	4.78022	8.12368	20.2357	6.6581	12.8194	0	RAB19	protein_coding
1123	ENSECAG00000016379	83.7759	0.619166	0.335299	1.84661	0.0648039	0.822458	47.8173	67.6061	116.24	123.685	151.772	83.9447	54.3834	47.9383	57.4088	86.9634	MAPK8IP3	protein_coding
1124	ENSECAG00000017628	2.76377	3.2405	1.76566	1.83529	0.0664632	0.822458	1.16628	0	0	17.0208	7.17034	0	0	0	1.6721	0.608135	ENTPD3	protein_coding
1125	ENSECAG00000017974	2.40036	3.55619	1.9288	1.84373	0.0652225	0.822458	5.83138	0	9.48902	0	5.97528	2.70789	0	0	0	0	LRRC43	protein_coding
1126	ENSECAG00000018189	143.71	0.355467	0.192593	1.84568	0.0649381	0.822458	155.115	186.5	157.755	142.975	163.723	113.731	146.709	135.159	105.9	129.533	TWSG1	protein_coding
1127	ENSECAG00000018249	27.4611	0.816681	0.441909	1.84807	0.0645917	0.822458	29.1569	27.9749	39.1422	37.4459	43.022	9.47762	13.912	13.3162	29.5404	31.623	LRRC45	protein_coding
1128	ENSECAG00000018661	37.4334	-0.708932	0.385712	-1.83798	0.0660647	0.822458	29.1569	30.3062	34.3977	24.9639	22.7061	52.8039	54.3834	51.9332	18.9505	54.7322	EXTL3	protein_coding
1129	ENSECAG00000018799	369.021	-0.254933	0.137727	-1.851	0.0641697	0.822458	341.719	317.049	317.882	347.225	358.517	426.493	380.684	361.535	401.862	437.249	PPM1G	protein_coding
1130	ENSECAG00000019008	81.4249	-0.717178	0.389769	-1.84001	0.065767	0.822458	54.815	93.2498	28.467	49.9278	80.0688	138.102	160.621	97.2083	41.2452	70.5437	SHROOM3	protein_coding
1131	ENSECAG00000019159	235.82	-0.339665	0.184756	-1.83844	0.0659969	0.822458	218.094	194.659	179.105	209.924	236.621	304.638	316.183	199.077	253.602	246.295	NUP85	protein_coding
1132	ENSECAG00000019783	532.369	0.350516	0.190736	1.83771	0.0661053	0.822458	742.918	581.645	568.155	562.823	531.8	411.6	336.418	397.489	579.662	611.176	SIGMAR1	protein_coding
1133	ENSECAG00000020168	170.629	0.457154	0.249891	1.82941	0.0673376	0.822458	125.958	324.043	158.941	192.903	185.234	132.687	155.562	161.126	122.063	147.777	PRKDC	protein_coding
1134	ENSECAG00000020406	999.606	-0.296683	0.16223	-1.82878	0.0674325	0.822458	853.714	910.351	971.438	838.56	910.633	1142.73	1155.96	1463.45	838.837	910.379	PPP1R12A	protein_coding
1135	ENSECAG00000020752	100.087	-0.461497	0.25104	-1.83834	0.0660119	0.822458	67.644	75.7654	117.427	81.7	77.6786	102.9	160.621	97.8741	116.49	102.775	DUSP29	protein_coding
1136	ENSECAG00000020996	53.9758	-0.568866	0.309759	-1.83648	0.0662868	0.822458	54.815	45.4593	36.7699	39.7153	39.4369	63.6355	97.3842	45.9409	55.1793	61.4217	BTBD2	protein_coding
1137	ENSECAG00000021086	275.501	-0.344407	0.188313	-1.8289	0.0674144	0.822458	234.422	297.234	219.433	181.556	279.643	314.115	373.095	323.584	262.52	269.404	0	protein_coding
1138	ENSECAG00000021388	85.2686	0.631338	0.341765	1.84729	0.0647054	0.822458	121.293	104.906	72.3537	76.0264	144.602	70.4052	32.883	115.185	45.7041	69.3274	PGAP6	protein_coding
1139	ENSECAG00000022217	241.854	0.296219	0.16156	1.83348	0.0667306	0.822458	264.745	250.609	262.134	301.836	255.742	189.552	204.886	221.715	210.685	256.633	UTP6	protein_coding
1140	ENSECAG00000022556	33.555	-1.28876	0.699819	-1.84157	0.0655382	0.822458	5.83138	13.9875	56.9341	20.425	0	78.5289	55.6481	29.9615	59.6383	14.5953	ABCA9	protein_coding
1141	ENSECAG00000024611	4.70569	-2.47298	1.34254	-1.84202	0.0654729	0.822458	1.16628	3.49687	1.18613	0	1.19506	10.8316	25.2946	3.32905	0.557367	0	NTF3	protein_coding
1142	ENSECAG00000024728	162.879	-0.417685	0.227246	-1.83804	0.0660571	0.822458	145.785	104.906	183.85	158.861	102.775	226.109	180.856	211.728	152.161	161.764	DNAJC21	protein_coding
1143	ENSECAG00000024918	10.7368	1.36461	0.745095	1.83146	0.067032	0.822458	6.99766	11.6562	18.978	6.80834	33.4616	4.06184	2.52946	6.6581	2.22947	13.9871	ANGPTL6	protein_coding
1144	ENSECAG00000024925	44.76	-0.911901	0.494448	-1.84428	0.0651422	0.822458	9.33021	23.3124	37.9561	39.7153	44.2171	105.608	65.766	21.3059	26.1962	74.1925	KLF9	protein_coding
1145	ENSECAG00000026938	4644.31	-0.263751	0.143479	-1.83825	0.0660254	0.822458	3945.51	5014.51	3395.88	3998.76	4746.76	5765.1	5654.61	5028.2	4562.61	4331.14	RPL28	protein_coding
1146	ENSECAG00000028359	778.019	0.313938	0.170422	1.84212	0.0654577	0.822458	894.534	956.976	823.172	861.255	779.177	476.589	714.572	627.859	729.593	916.46	SLC25A5	protein_coding
1147	ENSECAG00000028562	20.1467	1.03405	0.563345	1.83556	0.0664232	0.822458	32.6557	47.7905	28.467	19.2903	8.36539	5.41578	6.32365	19.3085	15.6063	18.2441	0	protein_coding
1148	ENSECAG00000031369	6.87608	-1.68533	0.920302	-1.83128	0.0670583	0.822458	10.4965	1.16562	3.55838	0	1.19506	4.06184	11.3826	15.3136	10.0326	11.5546	U1	snRNA
1149	ENSECAG00000047253	10.9056	-1.67696	0.907944	-1.84699	0.0647486	0.822458	1.16628	8.15935	2.37225	4.53889	9.56045	33.8487	15.1768	21.9717	12.2621	0	0	lncRNA
1150	ENSECAG00000048588	46.1887	0.935669	0.510998	1.83106	0.067091	0.822458	19.8267	45.4593	136.405	48.7931	53.7775	23.0171	15.1768	71.2417	25.0815	23.1091	TCIM	protein_coding
1151	ENSECAG00000049724	4.32123	2.27779	1.23468	1.84485	0.0650592	0.822458	0	6.99373	15.4197	9.07778	4.78022	0	0	4.66067	1.6721	0.608135	PTAFR	protein_coding
1152	ENSECAG00000050141	3.36459	3.10856	1.697	1.8318	0.0669819	0.822458	1.16628	0	18.978	2.26945	7.17034	4.06184	0	0	0	0	0	protein_coding
1153	ENSECAG00000051072	9.37688	1.69376	0.916027	1.84903	0.0644532	0.822458	3.49883	11.6562	17.7919	12.482	26.2912	4.06184	5.05892	0.66581	12.2621	0	0	protein_coding
1154	ENSECAG00000051405	3.0893	2.99085	1.63553	1.82868	0.0674481	0.822458	3.49883	10.4906	8.30289	4.53889	0	4.06184	0	0	0	0	0	lncRNA
1155	ENSECAG00000057141	35.1995	0.749069	0.406929	1.84078	0.0656532	0.822458	23.3255	44.2936	60.4925	49.9278	43.022	33.8487	11.3826	34.6221	20.0652	31.0149	0	lncRNA
1156	ENSECAG00000019038	99.2873	-0.477716	0.261392	-1.82758	0.0676122	0.823746	50.1499	86.256	99.6347	100.99	76.4836	129.979	146.709	114.519	97.5392	90.6122	KIF2C	protein_coding
1157	ENSECAG00000020151	49.4172	-0.549721	0.300881	-1.82704	0.0676937	0.824027	47.8173	36.1343	49.8173	26.0986	40.6319	67.6973	51.8539	57.9255	52.9499	63.2461	LIN7B	protein_coding
1158	ENSECAG00000005229	1294.91	0.373008	0.204294	1.82583	0.0678752	0.824924	2346.55	1256.54	1240.69	1258.41	1207.01	945.054	1006.73	983.401	1278.04	1426.69	ARF4	protein_coding
1159	ENSECAG00000009153	19.6847	1.06417	0.583414	1.82404	0.0681453	0.824924	12.829	44.2936	40.3283	20.425	15.5357	4.06184	20.2357	11.3188	21.7373	6.08135	ARHGAP25	protein_coding
1160	ENSECAG00000012230	69.1477	-0.742679	0.407132	-1.82417	0.0681261	0.824924	58.3138	60.6123	92.5179	28.3681	17.9258	115.085	122.679	54.5964	83.605	57.7729	KAT6B	protein_coding
1161	ENSECAG00000014738	312.783	0.277786	0.152347	1.82337	0.0682473	0.824924	367.377	313.552	302.462	355.168	376.443	285.683	252.946	302.944	258.061	313.19	IBTK	protein_coding
1162	ENSECAG00000020269	198.79	0.532756	0.292251	1.82294	0.0683121	0.824924	74.6417	289.074	285.857	228.079	297.569	158.412	178.327	163.789	171.669	140.479	XRCC4	protein_coding
1163	ENSECAG00000027680	75.6056	-0.638344	0.349933	-1.82419	0.0681237	0.824924	101.466	61.778	54.5618	45.3889	32.2665	69.0512	130.267	105.864	103.113	52.2996	0	Mt_tRNA
1164	ENSECAG00000035021	138.888	-0.481498	0.263898	-1.82456	0.0680671	0.824924	83.9719	199.321	83.0289	105.529	107.555	171.951	154.297	195.748	142.129	145.344	0	protein_coding
1165	ENSECAG00000049707	9.16519	2.00415	1.09957	1.82267	0.0683532	0.824924	16.3279	1.16562	10.6751	5.67361	39.4369	6.76973	1.26473	0	0	10.3383	0	protein_coding
1166	ENSECAG00000051698	2.37698	3.54042	1.94128	1.82375	0.0681897	0.824924	0	0	3.55838	7.94306	9.56045	2.70789	0	0	0	0	0	lncRNA
1167	ENSECAG00000058342	2.95343	2.98536	1.63723	1.82342	0.0682395	0.824924	0	4.66249	9.48902	6.80834	4.78022	0	3.79419	0	0	0	0	lncRNA
1168	ENSECAG00000016412	428.017	-0.324011	0.177932	-1.82098	0.0686093	0.827306	383.705	280.915	365.327	443.677	426.635	519.915	473.009	354.211	552.351	480.427	ARFGEF1	protein_coding
1169	ENSECAG00000000266	154.263	-0.418881	0.230499	-1.81728	0.0691738	0.8281	141.119	174.843	124.543	140.706	77.6786	180.075	216.269	163.789	166.095	157.507	RYBP	protein_coding
1170	ENSECAG00000004433	14.4051	-2.03584	1.12083	-1.81637	0.0693131	0.8281	1.16628	16.3187	3.55838	3.40417	3.58517	24.371	74.6191	0	0	17.0278	0	protein_coding
1171	ENSECAG00000006004	136.788	0.438184	0.240797	1.81972	0.0688014	0.8281	211.096	115.397	125.729	172.478	163.723	98.8381	108.767	101.869	160.522	109.464	GLTP	protein_coding
1172	ENSECAG00000010405	1021.74	-0.34957	0.192261	-1.81821	0.0690323	0.8281	745.251	968.632	985.672	811.327	978.751	1382.38	1454.44	1069.96	1138.7	682.328	TRIB2	protein_coding
1173	ENSECAG00000010759	119.612	-0.553077	0.30431	-1.81748	0.0691442	0.8281	101.466	101.409	116.24	73.757	89.6292	226.109	184.651	88.5527	77.474	136.83	HIVEP1	protein_coding
1174	ENSECAG00000011337	82.1109	-0.571672	0.315068	-1.81444	0.0696101	0.8281	44.3185	72.2686	51.0035	54.4667	107.555	146.226	73.3543	105.198	72.4577	94.261	ODF2	protein_coding
1175	ENSECAG00000015456	60.4499	-0.599408	0.32975	-1.81777	0.0690997	0.8281	44.3185	33.803	51.0035	37.4459	72.8984	74.467	106.237	49.9358	53.5072	80.882	SPAG5	protein_coding
1176	ENSECAG00000015527	60.1558	-0.804249	0.44339	-1.81386	0.069699	0.8281	34.9883	54.7842	48.6312	36.3111	43.022	88.0065	164.415	19.3085	51.2778	60.8135	SNX33	protein_coding
1177	ENSECAG00000020685	514.17	-0.268066	0.147527	-1.81706	0.0692074	0.8281	493.335	442.936	495.801	472.045	426.635	656.664	537.51	575.26	443.107	598.405	IGF2BP2	protein_coding
1178	ENSECAG00000022302	71.0925	0.550344	0.303004	1.81629	0.0693255	0.8281	58.3138	95.581	92.5179	105.529	71.7034	56.8657	39.2066	63.9178	84.7198	42.5695	ASB8	protein_coding
1179	ENSECAG00000024443	54.2041	0.595187	0.327893	1.81519	0.0694953	0.8281	86.3045	38.4655	55.748	81.7	64.533	31.1408	45.5303	59.9229	44.032	34.6637	TMEM62	protein_coding
1180	ENSECAG00000028311	3.70752	3.31302	1.82361	1.81673	0.0692582	0.8281	1.16628	0	20.1642	0	11.9506	0	3.79419	0	0	0	0	lncRNA
1181	ENSECAG00000044988	3.89473	2.84678	1.56965	1.81364	0.0697335	0.8281	4.66511	0	5.93064	18.1556	4.78022	5.41578	0	0	0	0	0	lncRNA
1182	ENSECAG00000047385	7.03502	2.46474	1.35833	1.81454	0.0695944	0.8281	32.6557	5.82811	0	2.26945	19.1209	1.35395	0	0	0	9.12203	0	lncRNA
1183	ENSECAG00000047524	5.39231	2.65903	1.46569	1.81418	0.0696495	0.8281	4.66511	0	11.8613	11.3472	17.9258	8.12368	0	0	0	0	0	lncRNA
1184	ENSECAG00000047983	191.893	-0.355534	0.195815	-1.81566	0.0694225	0.8281	164.445	166.684	179.105	196.307	132.651	261.312	251.681	183.098	201.209	182.441	0	protein_coding
1185	ENSECAG00000051098	35.6044	1.07715	0.593819	1.81394	0.0696864	0.8281	58.3138	18.65	86.5873	62.4098	16.7308	14.8934	10.1178	6.6581	57.9662	23.7173	0	protein_coding
1186	ENSECAG00000054139	12.5588	-2.09979	1.15669	-1.81533	0.0694725	0.8281	0	5.82811	7.11676	2.26945	8.36539	40.6184	46.795	0	0	14.5953	SCRG1	protein_coding
1187	ENSECAG00000014616	251.78	0.333805	0.18416	1.81258	0.0698964	0.82893	326.557	231.959	238.412	322.261	286.813	184.137	216.269	199.077	264.192	248.119	TTC14	protein_coding
1188	ENSECAG00000051067	918.125	0.24697	0.136265	1.81242	0.0699211	0.82893	851.382	977.957	1039.05	1007.63	1103.04	950.47	904.282	753.031	715.659	878.756	0	protein_coding
1189	ENSECAG00000022277	91.0857	-0.515182	0.284312	-1.81203	0.0699811	0.828943	72.3091	94.4154	37.9561	100.99	69.3133	83.9447	129.002	93.8792	109.244	119.803	MAOA	protein_coding
1190	ENSECAG00000010804	2.14452	-4.3068	2.37863	-1.81062	0.0701994	0.829048	0	0	0	0	0	13.5395	0	0	0	7.90576	NEPN	protein_coding
1191	ENSECAG00000018832	1482.61	-0.282324	0.155957	-1.81027	0.0702545	0.829048	1463.68	1545.61	1442.33	1180.11	1055.23	1819.7	1875.59	1682.5	1471.45	1289.86	GSTM3	protein_coding
1192	ENSECAG00000019423	674.419	-0.370577	0.204707	-1.81028	0.0702525	0.829048	607.63	739.004	486.312	532.185	573.627	764.98	1123.08	485.376	716.216	715.775	FNDC3B	protein_coding
1193	ENSECAG00000021673	43.2089	-0.850149	0.469676	-1.81007	0.0702842	0.829048	11.6628	9.32498	35.5838	62.4098	34.6566	51.45	88.5311	50.6016	43.4746	44.3939	GPR157	protein_coding
1194	ENSECAG00000029783	24.5057	0.855407	0.472556	1.81017	0.070269	0.829048	12.829	40.7968	42.7006	21.5597	40.6319	16.2474	10.1178	21.3059	13.9342	24.9336	CRIP2	protein_coding
1195	ENSECAG00000005195	10.1146	1.24988	0.692423	1.80508	0.0710614	0.829191	16.3279	9.32498	17.7919	12.482	14.3407	12.1855	7.58838	0.66581	5.57367	4.86508	TSC22D1	protein_coding
1196	ENSECAG00000008528	4.08756	-1.97542	1.09281	-1.80765	0.0706617	0.829191	3.49883	1.16562	3.55838	0	0	10.8316	6.32365	3.99486	7.24577	4.25695	0	protein_coding
1197	ENSECAG00000008637	4012.19	0.343119	0.189737	1.80839	0.0705452	0.829191	4435.35	3960.78	4207.19	5243.55	4591.41	3475.58	2201.89	5272.55	3494.69	3238.93	HMGCS1	protein_coding
1198	ENSECAG00000008905	20.8841	-0.954671	0.529159	-1.80413	0.0712115	0.829191	12.829	5.82811	18.978	10.2125	22.7061	46.0342	30.3535	11.9846	19.5078	30.4068	MCF2L2	protein_coding
1199	ENSECAG00000014091	73.3479	-0.622487	0.344444	-1.80722	0.0707278	0.829191	44.3185	81.5935	62.8647	54.4667	44.2171	115.085	120.149	83.8921	35.6715	91.2203	CCDC18	protein_coding
1200	ENSECAG00000015655	606.234	0.362612	0.200492	1.80861	0.0705109	0.829191	475.841	1065.38	552.735	683.103	633.38	541.578	497.039	520.663	596.383	496.239	ZNF462	protein_coding
1201	ENSECAG00000021106	9.11699	-1.53414	0.850611	-1.80358	0.0712972	0.829191	11.6628	3.49687	1.18613	3.40417	3.58517	6.76973	26.5593	4.66067	26.1962	3.64881	TECPR2	protein_coding
1202	ENSECAG00000022438	138.807	-0.597592	0.331265	-1.80397	0.071236	0.829191	57.1476	152.696	107.938	93.0473	139.822	209.862	255.475	151.139	71.343	149.601	CTSS	protein_coding
1203	ENSECAG00000023846	31.5367	-0.887105	0.490578	-1.80829	0.0705621	0.829191	29.1569	39.6312	10.6751	5.67361	25.0962	59.5736	41.7361	47.2725	26.7536	29.7986	LRCH3	protein_coding
1204	ENSECAG00000025076	126.945	0.684657	0.379559	1.80382	0.0712597	0.829191	38.4871	155.028	194.525	208.789	186.429	102.9	55.6481	131.83	60.1956	135.614	CTTNBP2	protein_coding
1205	ENSECAG00000029689	3.60016	-2.74691	1.52256	-1.80414	0.0712087	0.829191	4.66511	0	0	0	0	0	12.6473	8.65553	3.3442	6.68949	IL17REL	protein_coding
1206	ENSECAG00000039517	2.58757	-3.27723	1.81353	-1.8071	0.0707468	0.829191	1.16628	0	1.18613	0	0	5.41578	10.1178	7.98972	0	0	0	lncRNA
1207	ENSECAG00000046836	119.541	-0.656686	0.363667	-1.80574	0.0709596	0.829191	60.6464	75.7654	125.729	76.0264	124.286	167.889	265.593	129.167	119.834	50.4752	WDR5B	protein_coding
1208	ENSECAG00000047363	11.5424	-1.17362	0.649927	-1.80577	0.0709548	0.829191	9.33021	8.15935	4.74451	3.40417	9.56045	23.0171	17.7062	11.9846	5.0163	22.501	0	lncRNA
1209	ENSECAG00000053219	2.18455	-3.67022	2.029	-1.80888	0.0704691	0.829191	0	0	1.18613	0	0	1.35395	12.6473	6.6581	0	0	0	protein_coding
1210	ENSECAG00000054985	2.17578	-4.3225	2.3939	-1.80564	0.0709753	0.829191	0	0	0	0	0	0	18.971	0	2.78683	0	0	lncRNA
1211	ENSECAG00000057603	7.44002	-2.09744	1.16292	-1.8036	0.0712934	0.829191	1.16628	0	5.93064	1.13472	5.97528	12.1855	1.26473	16.6453	30.0978	0	0	protein_coding
1212	ENSECAG00000003277	110.538	-0.432943	0.240221	-1.80227	0.0715033	0.830433	108.464	123.556	64.0509	82.8348	90.8243	113.731	161.885	114.519	122.063	123.451	REL	protein_coding
1213	ENSECAG00000052900	2.56416	-3.90582	2.16731	-1.80215	0.0715219	0.830433	0	1.16562	0	0	0	6.76973	17.7062	0	0	0	0	protein_coding
1214	ENSECAG00000045231	16.8091	-0.971042	0.539087	-1.80127	0.0716602	0.831352	13.9953	3.49687	13.0474	15.8861	10.7555	12.1855	18.971	27.964	18.9505	32.8393	CHEK1	protein_coding
1215	ENSECAG00000000887	28.371	0.994713	0.552503	1.80037	0.0718015	0.831995	8.16394	39.6312	49.8173	77.1612	14.3407	23.0171	11.3826	13.982	26.7536	19.4603	ARL4C	protein_coding
1216	ENSECAG00000018757	63.3126	0.570639	0.317058	1.7998	0.0718928	0.831995	75.808	100.243	85.4011	54.4667	64.533	27.0789	45.5303	49.9358	73.5724	56.5566	SLC9A6	protein_coding
1217	ENSECAG00000050020	4.21504	2.59083	1.43922	1.80016	0.0718347	0.831995	3.49883	1.16562	7.11676	5.67361	17.9258	6.76973	0	0	0	0	0	lncRNA
1218	ENSECAG00000009513	942.002	-0.277309	0.154193	-1.79845	0.0721054	0.832834	853.714	701.704	821.986	1001.96	877.171	1210.43	1007.99	1157.18	794.805	993.085	GOLGB1	protein_coding
1219	ENSECAG00000010601	862.735	-0.250966	0.139593	-1.79784	0.0722018	0.832834	839.719	708.698	877.734	778.42	733.764	840.801	1136.99	888.856	997.129	825.24	FKBP2	protein_coding
1220	ENSECAG00000017794	3.39073	2.45631	1.36604	1.79813	0.0721566	0.832834	0	4.66249	1.18613	12.482	10.7555	0	0	0.66581	1.11473	3.04068	IRF1	protein_coding
1221	ENSECAG00000019332	81.2739	0.489884	0.272475	1.79791	0.072192	0.832834	85.1382	94.4154	116.24	78.2959	102.775	63.6355	37.9419	69.9101	78.0314	86.3552	AVL9	protein_coding
1222	ENSECAG00000017839	29.0405	-1.17391	0.653295	-1.79691	0.0723497	0.833645	1.16628	26.8093	18.978	23.8292	17.9258	48.7421	78.4133	4.66067	27.311	42.5695	0	protein_coding
1223	ENSECAG00000022464	84.667	0.450062	0.2505	1.79665	0.0723905	0.833645	100.3	107.237	100.821	98.7209	82.4589	70.4052	65.766	59.9229	101.441	59.5973	MTX2	protein_coding
1224	ENSECAG00000019447	180.763	0.360398	0.200703	1.79568	0.0725452	0.834062	184.272	269.259	208.758	199.711	154.162	146.226	173.268	143.149	182.259	146.561	TOM1L2	protein_coding
1225	ENSECAG00000030032	26.1689	-0.905643	0.50429	-1.79588	0.0725142	0.834062	18.6604	4.66249	21.3503	13.6167	32.2665	36.5565	55.6481	31.2931	17.8357	29.7986	CXXC4	protein_coding
1226	ENSECAG00000002402	5.96589	-1.67113	0.930843	-1.79529	0.0726077	0.8341	1.16628	1.16562	5.93064	4.53889	1.19506	18.9552	11.3826	1.99743	7.24577	6.08135	0	protein_coding
1227	ENSECAG00000003001	4.20732	2.42418	1.35132	1.79394	0.072823	0.835426	1.16628	0	1.18613	21.5597	11.9506	0	0	2.66324	1.11473	2.43254	0	protein_coding
1228	ENSECAG00000016110	48.8343	-0.716667	0.3996	-1.79346	0.0728994	0.835426	18.6604	37.2999	21.3503	44.2542	62.1429	83.9447	83.4722	42.6118	56.2941	38.3125	EXTL2	protein_coding
1229	ENSECAG00000021438	71.1091	-0.535486	0.29864	-1.79308	0.0729604	0.835426	54.815	61.778	81.8428	29.5028	62.1429	100.192	77.1485	93.8792	84.7198	65.0705	TBC1D12	protein_coding
1230	ENSECAG00000050519	84.498	0.465614	0.259623	1.79342	0.0729051	0.835426	87.4707	107.237	104.379	79.4306	112.335	55.5118	74.6191	77.8998	51.8351	94.261	0	lncRNA
1231	ENSECAG00000032992	946.59	0.264414	0.147506	1.79257	0.0730415	0.835676	1032.15	1171.45	1014.14	1082.53	867.611	829.969	723.426	900.175	774.74	1069.71	TIAM1	protein_coding
1232	ENSECAG00000054828	3.00673	2.94034	1.64195	1.79077	0.073331	0.838307	5.83138	3.49687	7.11676	0	9.56045	4.06184	0	0	0	0	0	protein_coding
1233	ENSECAG00000003470	4.02337	-2.24808	1.25714	-1.78825	0.0737357	0.838848	0	1.16562	1.18613	4.53889	0	2.70789	17.7062	0.66581	5.57367	6.68949	MBOAT4	protein_coding
1234	ENSECAG00000006470	83.5971	0.575842	0.321982	1.78843	0.0737066	0.838848	125.958	107.237	67.6092	139.571	60.9479	70.4052	43.0008	47.9383	93.6376	79.6657	STEAP3	protein_coding
1235	ENSECAG00000007669	129.087	0.423374	0.236746	1.7883	0.0737271	0.838848	171.443	124.722	148.266	156.592	139.822	120.501	75.8838	89.8844	155.505	108.248	0	protein_coding
1236	ENSECAG00000022136	202.541	0.385065	0.215167	1.78961	0.0735159	0.838848	155.115	193.493	262.134	239.427	298.764	136.749	170.739	199.077	198.423	171.494	DCTN6	protein_coding
1237	ENSECAG00000032767	804.702	-0.397433	0.222148	-1.78904	0.0736081	0.838848	727.757	614.283	738.957	579.843	809.053	1160.33	1212.88	861.558	885.656	456.71	FMR1	protein_coding
1238	ENSECAG00000054452	5.80765	2.16639	1.21025	1.79004	0.0734478	0.838848	10.4965	6.99373	13.0474	12.482	3.58517	1.35395	10.1178	0	0	0	0	protein_coding
1239	ENSECAG00000029754	4.73824	-2.49619	1.39754	-1.78614	0.0740768	0.842048	0	3.49687	1.18613	1.13472	1.19506	21.6631	11.3826	7.32391	0	0	0	protein_coding
1240	ENSECAG00000017829	433.772	0.343176	0.192292	1.78466	0.0743167	0.843105	376.707	473.243	701.001	490.2	386.003	316.823	392.066	354.211	436.976	410.491	KLHL8	protein_coding
1241	ENSECAG00000021745	288.078	0.330629	0.185259	1.78468	0.0743135	0.843105	249.583	321.712	412.772	363.111	259.327	231.525	228.916	274.314	285.929	253.592	POLE4	protein_coding
1242	ENSECAG00000031176	2.52425	-3.24586	1.81896	-1.78446	0.0743494	0.843105	0	0	0	1.13472	1.19506	8.12368	5.05892	0	0	9.73017	0	lncRNA
1243	ENSECAG00000001958	26.1374	-0.822373	0.460949	-1.78409	0.0744097	0.84311	11.6628	22.1468	23.7225	26.0986	10.7555	18.9552	50.5892	28.6298	45.7041	23.1091	TLR6	protein_coding
1244	ENSECAG00000037179	3.7146	3.23835	1.81564	1.78359	0.0744904	0.843346	0	0	26.0948	3.40417	3.58517	4.06184	0	0	0	0	0	lncRNA
1245	ENSECAG00000014572	1026.35	-0.40561	0.227461	-1.78321	0.0745523	0.843369	459.513	803.114	915.69	1142.67	1093.48	1268.65	1153.43	1578.64	865.591	982.747	RBBP6	protein_coding
1246	ENSECAG00000021704	139.037	-0.552349	0.310207	-1.78058	0.0749809	0.847537	55.9813	110.734	144.707	116.876	133.846	173.305	275.711	107.195	164.981	107.032	EGLN1	protein_coding
1247	ENSECAG00000008391	77.5725	0.528354	0.296916	1.77947	0.0751628	0.848834	72.3091	95.581	102.007	94.182	96.7995	46.0342	35.4124	61.9203	93.6376	77.8413	PALB2	protein_coding
1248	ENSECAG00000008664	585.164	0.276595	0.155465	1.77914	0.0752162	0.848834	627.457	699.373	728.282	570.766	583.187	415.661	513.48	492.699	625.366	595.365	SRSF7	protein_coding
1249	ENSECAG00000014855	14.9434	-1.68158	0.945636	-1.77825	0.0753626	0.849119	0	11.6562	17.7919	0	5.97528	6.76973	59.4423	25.3008	20.0652	2.43254	NIBAN3	protein_coding
1250	ENSECAG00000018141	294.112	0.480214	0.269999	1.77857	0.0753095	0.849119	417.527	248.278	398.539	238.292	412.294	143.518	278.241	176.44	396.288	231.7	CERS2	protein_coding
1251	ENSECAG00000019908	527.888	0.277221	0.155957	1.77754	0.0754787	0.849119	691.602	593.302	587.133	548.071	474.437	412.954	457.832	539.306	547.334	426.911	ATP5MC1	protein_coding
1252	ENSECAG00000049391	9.5508	-1.93312	1.08776	-1.77715	0.0755429	0.849119	1.16628	0	4.74451	6.80834	7.17034	18.9552	1.26473	25.3008	30.0978	0	0	lncRNA
1253	ENSECAG00000053506	6.34352	2.64505	1.48828	1.77725	0.0755268	0.849119	2.33255	17.4843	28.467	5.67361	0	9.47762	0	0	0	0	0	lncRNA
1254	ENSECAG00000009128	29.2023	0.719921	0.405217	1.77663	0.0756288	0.849407	38.4871	38.4655	34.3977	26.0986	45.4121	17.6013	12.6473	29.9615	16.721	32.2312	ADAT1	protein_coding
1255	ENSECAG00000008514	1732.27	0.206199	0.116283	1.77325	0.0761872	0.850784	1892.87	1789.23	1840.87	1902.93	1855.92	1487.99	1567	1669.19	1883.9	1432.77	ATP5MC3	protein_coding
1256	ENSECAG00000010086	174.203	-0.387294	0.218201	-1.77495	0.0759068	0.850784	123.625	156.193	126.916	174.747	170.893	262.666	215.004	199.077	169.997	142.912	KATNA1	protein_coding
1257	ENSECAG00000011265	29.5112	0.834471	0.470056	1.77526	0.0758551	0.850784	65.3115	23.3124	26.0948	22.6945	52.5825	18.9552	12.6473	17.9769	37.9009	17.6359	GSTZ1	protein_coding
1258	ENSECAG00000012333	342.09	0.310962	0.175256	1.77434	0.0760077	0.850784	408.197	418.458	354.652	321.127	395.564	258.604	233.975	366.196	353.371	310.757	MRPS23	protein_coding
1259	ENSECAG00000012950	49.4153	0.655247	0.369604	1.77283	0.0762561	0.850784	38.4871	61.778	80.6566	76.0264	45.4121	51.45	18.971	53.2648	26.7536	41.3532	VTI1A	protein_coding
1260	ENSECAG00000015330	91.8768	0.510681	0.287982	1.77331	0.0761776	0.850784	149.283	95.581	125.729	107.799	62.1429	67.6973	65.766	106.53	57.9662	80.2739	SRFBP1	protein_coding
1261	ENSECAG00000019216	5.52726	-1.71064	0.964907	-1.77285	0.0762534	0.850784	1.16628	5.82811	1.18613	4.53889	0	9.47762	16.4415	5.99229	3.3442	7.29763	ANAPC2	protein_coding
1262	ENSECAG00000021240	134.516	-0.491792	0.277441	-1.7726	0.0762951	0.850784	141.119	144.537	80.6566	135.032	57.3627	203.092	116.355	148.476	168.325	150.209	SH3RF1	protein_coding
1263	ENSECAG00000051124	777.267	0.237063	0.133653	1.77371	0.0761109	0.850784	923.691	849.739	803.008	843.099	788.737	702.698	585.57	724.401	837.165	714.559	0	protein_coding
1264	ENSECAG00000006905	3.03761	2.28495	1.29101	1.76989	0.0767451	0.851085	3.49883	2.33124	3.55838	6.80834	8.36539	1.35395	3.79419	0.66581	0	0	PLPPR3	protein_coding
1265	ENSECAG00000014532	153.133	0.367477	0.207439	1.77149	0.0764786	0.851085	185.438	210.978	123.357	181.556	162.528	124.563	116.355	161.126	130.424	135.006	USP5	protein_coding
1266	ENSECAG00000019985	117.735	0.431083	0.243529	1.77015	0.0767022	0.851085	160.946	156.193	80.6566	138.436	139.822	90.7144	110.032	81.8946	96.4245	122.235	PPIL3	protein_coding
1267	ENSECAG00000031808	6.23014	-1.9181	1.08247	-1.77196	0.0764011	0.851085	1.16628	0	1.18613	5.67361	4.78022	12.1855	26.5593	0.66581	2.78683	7.29763	SAPCD2	protein_coding
1268	ENSECAG00000044796	69.9518	-0.62694	0.354146	-1.77029	0.0766792	0.851085	47.8173	102.575	52.1896	43.1195	28.6813	78.5289	118.885	56.5939	70.7856	100.342	GREM1	protein_coding
1269	ENSECAG00000050930	195.261	0.313262	0.176891	1.77093	0.0765724	0.851085	242.586	212.143	207.572	226.945	193.599	192.26	135.326	183.764	191.177	167.237	CNP	protein_coding
1270	ENSECAG00000054543	11.8687	-1.24062	0.700493	-1.77107	0.0765486	0.851085	0	5.82811	9.48902	13.6167	5.97528	25.725	22.7651	11.3188	10.59	13.379	0	lncRNA
1271	ENSECAG00000000682	339.589	0.37026	0.209357	1.76856	0.0769674	0.851465	387.204	286.743	495.801	342.686	403.929	184.137	355.389	282.303	310.453	347.245	NDUFB5	protein_coding
1272	ENSECAG00000009568	24.3208	-0.781648	0.441942	-1.76867	0.0769494	0.851465	8.16394	26.8093	22.5364	11.3472	20.316	33.8487	36.6772	28.6298	31.7699	23.1091	CENPI	protein_coding
1273	ENSECAG00000013423	1563.03	-0.332055	0.187683	-1.76924	0.0768547	0.851465	956.347	1409.24	1502.82	1570.46	1479.48	2039.04	1669.44	2254.43	1198.34	1550.75	RBM39	protein_coding
1274	ENSECAG00000051518	4.91673	-1.83187	1.03599	-1.76824	0.0770212	0.851465	0	1.16562	3.55838	1.13472	4.78022	5.41578	20.2357	5.32648	3.90157	3.64881	0	lncRNA
1275	ENSECAG00000018579	747.52	-0.397839	0.225222	-1.76643	0.0773232	0.854134	556.314	772.807	658.3	563.957	671.622	976.195	1172.4	838.255	856.673	408.667	F11R	protein_coding
1276	ENSECAG00000036257	47.9537	0.605393	0.342807	1.76599	0.0773979	0.854289	65.3115	62.9436	42.7006	60.1403	59.7528	28.4329	26.5593	54.5964	52.9499	26.1498	0	protein_coding
1277	ENSECAG00000020840	86.256	-0.544381	0.308458	-1.76485	0.0775897	0.854396	59.4801	75.7654	67.6092	54.4667	92.0193	104.254	166.944	81.2288	57.4088	103.383	OSBPL11	protein_coding
1278	ENSECAG00000022702	127.067	-0.579658	0.328423	-1.76497	0.077568	0.854396	120.126	109.568	68.7954	62.4098	146.992	235.587	168.209	148.476	65.7693	144.736	ARHGEF12	protein_coding
1279	ENSECAG00000052949	3.84422	2.07322	1.17438	1.76538	0.0775003	0.854396	4.66511	3.49687	7.11676	11.3472	4.78022	1.35395	0	0.66581	5.0163	0	0	protein_coding
1280	ENSECAG00000015467	4.28419	-2.07649	1.17731	-1.76375	0.0777743	0.85576	2.33255	2.33124	0	2.26945	1.19506	6.76973	11.3826	8.65553	0	7.90576	ABI1	protein_coding
1281	ENSECAG00000052915	3.47245	3.13768	1.78076	1.76199	0.0780706	0.85835	0	0	14.2335	5.67361	10.7555	4.06184	0	0	0	0	0	lncRNA
1282	ENSECAG00000015615	2.51167	-3.2608	1.85236	-1.76035	0.0783488	0.860737	1.16628	0	0	1.13472	0	2.70789	5.05892	0	15.0489	0	OXA1L	protein_coding
1283	ENSECAG00000022609	2.26215	3.46904	1.97219	1.75897	0.0785818	0.862624	0	8.15935	2.37225	0	9.56045	0	2.52946	0	0	0	CHRNA2	protein_coding
1284	ENSECAG00000007228	143.817	0.34249	0.195091	1.75554	0.0791667	0.864234	167.944	191.162	137.591	148.649	160.138	128.625	102.443	127.17	144.915	129.533	ARHGAP31	protein_coding
1285	ENSECAG00000009347	320.394	0.288227	0.164399	1.75322	0.0795643	0.864234	428.024	326.374	323.813	322.261	360.907	242.356	346.536	270.319	305.437	277.918	IFNGR1	protein_coding
1286	ENSECAG00000009631	14.5823	1.32448	0.753737	1.75722	0.0788797	0.864234	16.3279	40.7968	9.48902	19.2903	19.1209	4.06184	2.52946	14.6478	18.9505	0.608135	FBXO6	protein_coding
1287	ENSECAG00000009974	2.26069	-3.06701	1.74615	-1.75644	0.079014	0.864234	0	0	1.18613	0	1.19506	2.70789	7.58838	9.32134	0	0.608135	PON3	protein_coding
1288	ENSECAG00000011471	452.574	0.311802	0.177744	1.75422	0.0793935	0.864234	535.321	644.589	380.747	436.868	509.094	448.156	357.919	336.9	469.303	406.843	AXL	protein_coding
1289	ENSECAG00000012021	35.66	0.758336	0.431428	1.75773	0.0787931	0.864234	31.4895	51.2874	26.0948	49.9278	64.533	48.7421	12.6473	25.9666	16.721	29.1905	ST3GAL3	protein_coding
1290	ENSECAG00000019355	240.8	-0.471318	0.268502	-1.75536	0.0791983	0.864234	89.8033	195.825	206.386	247.37	268.888	377.751	230.181	336.234	226.291	229.267	ZEB2	protein_coding
1291	ENSECAG00000019618	187.917	0.36865	0.210161	1.75413	0.0794075	0.864234	212.262	186.5	192.153	239.427	229.451	128.625	177.062	191.753	117.604	204.334	FAR1	protein_coding
1292	ENSECAG00000021369	453.971	-0.257272	0.146795	-1.75259	0.0796725	0.864234	416.361	424.286	470.892	425.521	329.835	561.888	464.156	457.412	481.565	507.793	PUM1	protein_coding
1293	ENSECAG00000022930	115.497	-0.462073	0.263684	-1.75237	0.0797103	0.864234	89.8033	79.2623	86.5873	136.167	93.2144	188.199	93.59	156.465	100.326	131.357	C13H7orf50	protein_coding
1294	ENSECAG00000023572	120.802	-0.469119	0.267431	-1.75417	0.0794021	0.864234	94.4684	93.2498	149.452	105.529	64.533	120.501	132.797	195.748	147.145	104.599	TOR1AIP2	protein_coding
1295	ENSECAG00000023814	178.72	0.406811	0.232103	1.75272	0.0796503	0.864234	228.59	201.653	138.777	220.136	231.841	136.749	111.296	144.481	150.489	223.186	LRPPRC	protein_coding
1296	ENSECAG00000026852	76.2537	0.459504	0.261719	1.75572	0.0791367	0.864234	106.131	68.7717	84.215	91.9126	92.0193	59.5736	48.0597	65.9152	86.9492	58.9891	ZCCHC10	protein_coding
1297	ENSECAG00000038974	20.9761	-0.972349	0.554072	-1.75492	0.0792736	0.864234	25.6581	9.32498	14.2335	9.07778	11.9506	32.4947	48.0597	11.9846	11.7047	35.2719	LRRC61	protein_coding
1298	ENSECAG00000055523	1076.16	0.265265	0.1513	1.75325	0.0795596	0.864234	1518.49	1136.48	976.183	1158.55	1083.92	1026.29	972.577	796.309	1025.56	1067.28	CALU	protein_coding
1299	ENSECAG00000059121	511.049	-0.318804	0.181502	-1.75647	0.0790076	0.864234	312.562	412.63	491.057	482.257	576.017	544.286	548.893	709.754	516.122	516.915	0	protein_coding
1300	ENSECAG00000002087	360.992	0.350409	0.200769	1.74533	0.0809269	0.865407	570.309	459.255	285.857	340.417	369.272	291.098	261.799	329.576	354.485	347.853	SAE1	protein_coding
1301	ENSECAG00000006127	445.952	-0.297875	0.170379	-1.74831	0.0804111	0.865407	432.689	404.471	306.021	475.449	382.418	473.881	446.45	630.522	444.221	463.399	SBNO1	protein_coding
1302	ENSECAG00000009882	151.224	0.385747	0.220834	1.74678	0.0806758	0.865407	163.279	212.143	162.499	206.52	113.53	124.563	106.237	147.144	144.358	131.965	PBDC1	protein_coding
1303	ENSECAG00000011891	8.84465	-1.38142	0.790844	-1.74676	0.0806785	0.865407	8.16394	0	4.74451	9.07778	2.39011	23.0171	7.58838	6.6581	12.8194	13.9871	NTN4	protein_coding
1304	ENSECAG00000014368	82.6517	-0.556457	0.318113	-1.74924	0.0802491	0.865407	62.9789	66.4405	117.427	51.0625	37.0467	81.2368	102.443	79.8972	94.195	133.79	MCM5	protein_coding
1305	ENSECAG00000015037	16.5641	-1.3301	0.76035	-1.74932	0.0802352	0.865407	8.16394	5.82811	8.30289	12.482	11.9506	20.3092	59.4423	27.964	10.59	0.608135	NRADD	protein_coding
1306	ENSECAG00000015391	88.5455	-0.458617	0.26244	-1.74751	0.0805487	0.865407	90.9696	54.7842	77.0983	65.8139	83.6539	119.147	99.9137	115.851	66.3267	111.897	IMPDH1	protein_coding
1307	ENSECAG00000017076	939.193	-0.322911	0.184919	-1.74623	0.0807707	0.865407	587.803	714.526	893.154	897.566	1080.33	1070.97	882.782	1215.77	825.46	1223.57	NSRP1	protein_coding
1308	ENSECAG00000017336	200.206	0.365138	0.208918	1.74776	0.0805064	0.865407	207.597	201.653	273.995	175.882	268.888	138.102	201.092	147.144	216.816	170.886	ZFAND3	protein_coding
1309	ENSECAG00000017367	31.6669	-0.827721	0.473592	-1.74775	0.0805072	0.865407	16.3279	27.9749	20.1642	30.6375	17.9258	46.0342	78.4133	41.946	18.3931	18.8522	ZDHHC15	protein_coding
1310	ENSECAG00000018741	274.212	0.318704	0.18257	1.74566	0.0808703	0.865407	317.227	297.234	361.769	276.872	271.278	235.587	189.71	264.327	311.011	217.104	SRSF3	protein_coding
1311	ENSECAG00000019528	199.599	0.334452	0.191664	1.74499	0.0809859	0.865407	295.068	214.474	209.944	196.307	198.379	159.766	178.327	153.136	211.799	178.792	MKKS	protein_coding
1312	ENSECAG00000019680	20.1553	-1.0083	0.576344	-1.74948	0.080208	0.865407	19.8267	15.1531	8.30289	10.2125	13.1456	29.7868	39.2066	3.99486	27.8683	34.0556	PLCXD3	protein_coding
1313	ENSECAG00000020117	2.65465	3.70402	2.12015	1.74706	0.0806272	0.865407	0	0	8.30289	0	15.5357	2.70789	0	0	0	0	SLC22A15	protein_coding
1314	ENSECAG00000022215	191.837	-0.275073	0.157221	-1.74959	0.0801885	0.865407	173.775	162.021	175.547	175.882	180.453	209.862	217.534	206.401	203.439	213.456	CRNKL1	protein_coding
1315	ENSECAG00000024238	120.913	-0.480154	0.275017	-1.7459	0.0808277	0.865407	153.949	85.0904	91.3318	89.6431	83.6539	166.535	160.621	179.769	110.359	88.1796	N4BP1	protein_coding
1316	ENSECAG00000025072	196.788	-0.319046	0.182346	-1.74967	0.0801746	0.865407	190.103	201.653	177.919	132.763	172.088	259.958	206.151	211.062	211.242	204.942	KDM2A	protein_coding
1317	ENSECAG00000043851	3.09647	2.44098	1.39814	1.74588	0.0808322	0.865407	0	4.66249	9.48902	7.94306	3.58517	4.06184	0	0.66581	0.557367	0	0	lncRNA
1318	ENSECAG00000045937	8.64177	-2.20462	1.26337	-1.74503	0.0809789	0.865407	0	3.49687	9.48902	1.13472	1.19506	16.2474	32.883	21.9717	0	0	0	protein_coding
1319	ENSECAG00000014168	1548.81	0.216277	0.123991	1.74429	0.0811085	0.866059	1647.95	1664.51	1661.76	1853	1499.8	1382.38	1212.88	1535.36	1620.82	1409.66	PSMA7	protein_coding
1320	ENSECAG00000009235	158.725	0.380175	0.218113	1.74302	0.0813306	0.867116	215.761	196.99	156.569	147.514	181.649	143.518	117.62	99.8715	153.833	173.927	YIF1A	protein_coding
1321	ENSECAG00000009835	6.6713	-1.61447	0.926182	-1.74314	0.0813085	0.867116	0	5.82811	8.30289	1.13472	1.19506	9.47762	8.85311	13.982	3.3442	14.5953	BTBD11	protein_coding
1322	ENSECAG00000049635	5.829	-2.16179	1.24069	-1.74241	0.0814364	0.867587	5.83138	0	1.18613	0	3.58517	23.0171	2.52946	9.32134	12.8194	0	0	lncRNA
1323	ENSECAG00000022375	1506.42	0.23598	0.135467	1.74197	0.0815132	0.867668	1626.96	1786.9	1471.98	1705.49	1558.35	1344.47	1201.49	1268.37	1744	1356.14	PSMD2	protein_coding
1324	ENSECAG00000051434	7.2631	-1.75635	1.00843	-1.74166	0.0815672	0.867668	0	0	2.37225	2.26945	11.9506	2.70789	24.0299	10.653	8.91787	9.73017	0	lncRNA
1325	ENSECAG00000014479	19.163	0.937407	0.538889	1.73952	0.0819438	0.871016	24.4918	22.1468	47.4451	14.7514	17.9258	9.47762	8.85311	6.6581	22.852	17.0278	PXDC1	protein_coding
1326	ENSECAG00000013924	69.0073	-0.776433	0.446489	-1.73897	0.0820393	0.871354	29.1569	72.2686	13.0474	31.7722	107.555	115.085	108.767	85.8895	73.0151	53.5159	SERPIND1	protein_coding
1327	ENSECAG00000020625	95.7703	-0.47048	0.270638	-1.73841	0.0821391	0.871354	68.8103	50.1217	68.7954	98.7209	115.92	97.4841	93.59	125.838	106.457	131.965	MTMR14	protein_coding
1328	ENSECAG00000059850	3.12	-2.50063	1.43856	-1.73828	0.0821612	0.871354	1.16628	0	1.18613	1.13472	1.19506	8.12368	3.79419	0.66581	13.9342	0	0	protein_coding
1329	ENSECAG00000012999	676.303	-0.257922	0.148446	-1.73748	0.0823028	0.872199	559.813	558.333	583.574	705.798	671.622	829.969	666.513	868.216	639.3	679.895	SUGT1	protein_coding
1330	ENSECAG00000002086	201.498	0.420677	0.242372	1.73566	0.0826231	0.872257	304.398	205.149	243.156	222.406	181.649	138.102	99.9137	192.419	230.75	197.036	PRPS2	protein_coding
1331	ENSECAG00000003253	8.86062	-1.35191	0.779339	-1.73468	0.0827967	0.872257	1.16628	5.82811	5.93064	4.53889	7.17034	10.8316	29.0888	12.6504	8.3605	3.04068	GLB1L	protein_coding
1332	ENSECAG00000008394	5.89254	1.79408	1.03424	1.73469	0.0827962	0.872257	9.33021	10.4906	13.0474	2.26945	9.56045	5.41578	7.58838	0.66581	0.557367	0	NCOA2	protein_coding
1333	ENSECAG00000015644	4.4568	2.66088	1.53301	1.73573	0.0826118	0.872257	4.66511	6.99373	20.1642	0	5.97528	6.76973	0	0	0	0	SLC1A2	protein_coding
1334	ENSECAG00000016494	145.814	0.416944	0.240131	1.73632	0.0825073	0.872257	251.916	125.887	154.197	144.11	158.942	125.917	94.8548	121.843	158.85	121.627	MICU2	protein_coding
1335	ENSECAG00000021302	87.8648	-0.657209	0.378873	-1.73464	0.082804	0.872257	58.3138	64.1092	85.4011	43.1195	88.4341	152.996	173.268	63.9178	39.0157	110.073	POC1A	protein_coding
1336	ENSECAG00000021995	89.0394	-0.541434	0.311931	-1.73575	0.0826083	0.872257	131.789	59.4467	43.8867	70.3528	57.3627	73.1131	130.267	101.869	109.801	112.505	M6PR	protein_coding
1337	ENSECAG00000027915	3.08747	-2.96605	1.70842	-1.73613	0.0825406	0.872257	1.16628	0	1.18613	1.13472	0	9.47762	1.26473	16.6453	0	0	0	protein_coding
1338	ENSECAG00000057204	163.918	0.422373	0.243542	1.7343	0.0828656	0.872257	107.297	226.131	186.222	186.095	231.841	162.474	151.768	95.8766	151.604	139.871	0	lncRNA
1339	ENSECAG00000013142	26.9568	0.97817	0.564427	1.73303	0.0830896	0.873961	39.6534	23.3124	32.0254	32.907	51.3874	27.0789	0	25.3008	24.5241	13.379	AAGAB	protein_coding
1340	ENSECAG00000013721	4.84099	2.05131	1.18399	1.73254	0.0831775	0.874087	6.99766	0	11.8613	14.7514	5.97528	0	0	0.66581	3.90157	4.25695	SH2D5	protein_coding
1341	ENSECAG00000028861	3.8587	2.87454	1.65941	1.73227	0.0832257	0.874087	0	0	9.48902	21.5597	2.39011	1.35395	3.79419	0	0	0	eca-mir-8911	miRNA
1342	ENSECAG00000011667	100.333	0.434853	0.251749	1.72733	0.0841085	0.875443	152.782	83.9248	90.1457	118.011	132.651	83.9447	70.8249	89.8844	74.1298	107.032	PACSIN2	protein_coding
1343	ENSECAG00000012813	76.9939	0.480455	0.278083	1.72774	0.0840349	0.875443	82.8056	127.053	78.2844	88.5084	72.8984	59.5736	50.5892	84.5579	75.8019	49.8671	TSEN2	protein_coding
1344	ENSECAG00000013957	251.371	0.473863	0.274175	1.72832	0.0839311	0.875443	199.433	361.343	257.39	414.174	231.841	180.075	104.973	241.023	302.093	221.361	PDE5A	protein_coding
1345	ENSECAG00000014155	69.6628	0.848121	0.490571	1.72885	0.0838366	0.875443	29.1569	94.4154	190.966	62.4098	69.3133	54.1578	102.443	15.9794	27.311	50.4752	SMOC2	protein_coding
1346	ENSECAG00000018789	212.765	0.290531	0.167904	1.73034	0.0835701	0.875443	235.588	224.965	208.758	287.085	213.915	197.676	184.651	207.067	186.718	181.224	RALBP1	protein_coding
1347	ENSECAG00000019458	538.669	-0.306165	0.177314	-1.72668	0.084225	0.875443	424.525	448.765	467.334	467.506	598.723	666.141	646.277	571.931	404.648	690.842	UTRN	protein_coding
1348	ENSECAG00000022058	76.7569	-0.520605	0.300785	-1.73082	0.0834843	0.875443	64.1452	82.7592	53.3757	69.2181	44.2171	106.962	123.944	69.9101	55.7367	97.3017	ODF2L	protein_coding
1349	ENSECAG00000022164	399.602	-0.457596	0.264467	-1.73026	0.0835842	0.875443	216.927	269.259	354.652	388.075	452.926	580.843	579.246	523.993	212.914	417.181	SMC4	protein_coding
1350	ENSECAG00000022850	14.5254	1.09811	0.635965	1.72669	0.0842235	0.875443	11.6628	5.82811	39.1422	22.6945	20.316	2.70789	8.85311	13.982	6.6884	13.379	CERKL	protein_coding
1351	ENSECAG00000026812	19.8998	-0.837508	0.484337	-1.72918	0.0837761	0.875443	25.6581	9.32498	11.8613	11.3472	13.1456	20.3092	31.6183	35.9537	17.2784	22.501	FANCF	protein_coding
1352	ENSECAG00000026945	272.667	-0.524145	0.303198	-1.72872	0.0838588	0.875443	276.408	186.5	217.061	154.322	282.033	395.352	533.716	131.165	316.584	233.524	HES1	protein_coding
1353	ENSECAG00000033220	4.21372	1.89493	1.09587	1.72915	0.0837823	0.875443	3.49883	9.32498	13.0474	5.67361	1.19506	2.70789	3.79419	0.66581	2.22947	0	0	protein_coding
1354	ENSECAG00000043469	2.8112	-3.43132	1.98377	-1.7297	0.0836848	0.875443	1.16628	0	1.18613	0	0	8.12368	0	0	0	17.6359	0	lncRNA
1355	ENSECAG00000045791	2.32206	-3.10788	1.79966	-1.72692	0.0841813	0.875443	0	0	2.37225	0	0	0	12.6473	3.99486	0.557367	3.64881	0	lncRNA
1356	ENSECAG00000017574	204.628	-0.391036	0.226652	-1.72527	0.0844786	0.876863	181.939	159.69	177.919	138.436	225.866	292.452	233.975	266.99	141.571	227.443	MICU1	protein_coding
1357	ENSECAG00000018606	239.145	-0.3368	0.195221	-1.72523	0.0844862	0.876863	237.92	185.334	231.295	213.328	186.429	311.408	313.653	254.339	182.259	275.485	DHX40	protein_coding
1358	ENSECAG00000005244	19.8432	-1.02393	0.594859	-1.7213	0.0851959	0.878324	27.9906	11.6562	1.18613	6.80834	17.9258	27.0789	20.2357	25.3008	39.5731	20.6766	PDHB	protein_coding
1359	ENSECAG00000006330	7.43883	-1.8182	1.05721	-1.71981	0.0854673	0.878324	4.66511	0	1.18613	4.53889	5.97528	5.41578	24.0299	13.982	0	14.5953	AK8	protein_coding
1360	ENSECAG00000008152	26.1294	0.837468	0.487296	1.7186	0.0856871	0.878324	25.6581	36.1343	43.8867	48.7931	14.3407	12.1855	8.85311	23.3034	32.3273	15.8115	CFAP300	protein_coding
1361	ENSECAG00000008202	337.659	0.320302	0.18605	1.7216	0.0851428	0.878324	447.85	335.699	408.028	327.935	356.127	226.109	356.654	362.201	312.125	243.862	SBDS	protein_coding
1362	ENSECAG00000009309	190.9	0.412831	0.240033	1.71989	0.0854521	0.878324	295.068	233.124	120.985	208.789	233.036	154.35	151.768	155.8	216.816	139.263	HACL1	protein_coding
1363	ENSECAG00000010246	88.7867	-0.571385	0.33185	-1.72182	0.085103	0.878324	81.6394	57.1155	74.726	64.6792	77.6786	90.7144	194.768	58.5913	66.3267	121.627	AHDC1	protein_coding
1364	ENSECAG00000010606	4.53616	1.9618	1.14057	1.72003	0.0854277	0.878324	23.3255	2.33124	5.93064	1.13472	3.58517	1.35395	1.26473	0	2.78683	3.64881	0	protein_coding
1365	ENSECAG00000011998	6.51928	-1.99402	1.16007	-1.71887	0.0856377	0.878324	1.16628	0	1.18613	1.13472	9.56045	5.41578	25.2946	0	11.7047	9.73017	SMPD5	protein_coding
1366	ENSECAG00000012475	22.3123	-1.10106	0.640624	-1.71873	0.0856635	0.878324	3.49883	4.66249	18.978	14.7514	28.6813	40.6184	44.2656	44.6093	7.24577	15.8115	SGO1	protein_coding
1367	ENSECAG00000015369	31.1501	1.10039	0.639613	1.72039	0.085361	0.878324	16.3279	25.6437	16.6058	14.7514	138.627	18.9552	34.1477	7.32391	24.5241	14.5953	NID2	protein_coding
1368	ENSECAG00000019417	2.58814	2.76329	1.60511	1.72156	0.0851497	0.878324	0	5.82811	2.37225	10.2125	3.58517	1.35395	2.52946	0	0	0	ZNF541	protein_coding
1369	ENSECAG00000019605	28.7661	0.800567	0.464957	1.72181	0.0851038	0.878324	24.4918	20.9812	39.1422	44.2542	53.7775	35.2026	7.58838	13.982	24.5241	23.7173	CLTRN	protein_coding
1370	ENSECAG00000023135	22.7	0.754294	0.437966	1.72226	0.0850215	0.878324	41.986	17.4843	33.2116	21.5597	28.6813	18.9552	10.1178	21.3059	17.2784	16.4197	LYRM7	protein_coding
1371	ENSECAG00000039673	10.5845	-1.69333	0.983982	-1.72089	0.0852707	0.878324	4.66511	2.33124	2.37225	3.40417	11.9506	16.2474	49.3245	3.99486	0	11.5546	0	protein_coding
1372	ENSECAG00000043885	16.2079	1.67599	0.973789	1.7211	0.0852328	0.878324	6.99766	19.8156	24.9087	10.2125	62.1429	5.41578	1.26473	0.66581	30.6552	0	0	lncRNA
1373	ENSECAG00000048718	4.69306	2.46001	1.43124	1.71879	0.0856519	0.878324	13.9953	3.49687	2.37225	0	19.1209	5.41578	2.52946	0	0	0	0	protein_coding
1374	ENSECAG00000051367	8.1982	1.81462	1.05474	1.72045	0.0853512	0.878324	2.33255	5.82811	23.7225	6.80834	25.0962	4.06184	3.79419	0	0	10.3383	0	lncRNA
1375	ENSECAG00000022407	15.0701	1.15548	0.672978	1.71696	0.0859857	0.880743	10.4965	9.32498	34.3977	19.2903	31.0715	12.1855	0	7.98972	15.6063	10.3383	SLIT2	protein_coding
1376	ENSECAG00000003837	10.918	-1.51595	0.883187	-1.71645	0.0860799	0.881068	3.49883	1.16562	11.8613	1.13472	10.7555	24.371	0	23.3034	17.2784	15.8115	CXCR4	protein_coding
1377	ENSECAG00000000060	268.213	-0.338839	0.197597	-1.7148	0.0863817	0.881608	239.087	238.953	284.67	222.406	195.989	384.521	355.389	257.668	221.275	282.175	CIAPIN1	protein_coding
1378	ENSECAG00000021680	63.7818	-0.583921	0.34052	-1.71479	0.0863831	0.881608	32.6557	52.453	65.237	52.1973	51.3874	83.9447	123.944	39.2828	74.6872	62.0298	BMT2	protein_coding
1379	ENSECAG00000023334	5.24323	-1.64133	0.957026	-1.71503	0.0863395	0.881608	0	4.66249	1.18613	5.67361	1.19506	10.8316	3.79419	5.32648	10.0326	9.73017	STRIP2	protein_coding
1380	ENSECAG00000036787	7.61672	2.02456	1.18005	1.71565	0.0862262	0.881608	0	24.4781	20.1642	13.6167	2.39011	8.12368	2.52946	0	0	4.86508	0	protein_coding
1381	ENSECAG00000015755	414.498	-0.267297	0.156057	-1.71282	0.0867457	0.884028	362.712	423.121	333.302	377.863	381.223	530.747	478.068	484.71	363.961	409.275	UBR5	protein_coding
1382	ENSECAG00000049088	4.33401	2.35161	1.37269	1.71315	0.0866853	0.884028	1.16628	4.66249	21.3503	1.13472	7.17034	4.06184	3.79419	0	0	0	0	lncRNA
1383	ENSECAG00000028849	5.62262	2.25791	1.31857	1.71239	0.0868247	0.884194	12.829	8.15935	0	7.94306	16.7308	6.76973	3.79419	0	0	0	0	protein_coding
1384	ENSECAG00000016291	1048.74	-0.251829	0.14713	-1.71161	0.0869682	0.885014	731.255	1068.88	890.781	953.167	1144.86	1092.63	1019.37	1277.69	1131.45	1177.35	CCAR1	protein_coding
1385	ENSECAG00000002513	39.0064	-0.783451	0.458532	-1.70861	0.087524	0.885862	8.16394	18.65	35.5838	38.5806	41.827	67.6973	59.4423	21.3059	56.8514	41.9613	ERCC6L	protein_coding
1386	ENSECAG00000007787	560.183	-0.313658	0.183597	-1.70841	0.0875611	0.885862	474.675	502.383	403.283	567.361	547.336	699.99	768.956	443.429	693.922	500.495	HP1BP3	protein_coding
1387	ENSECAG00000008032	38.801	0.753954	0.441613	1.70727	0.0877712	0.885862	22.1593	37.2999	85.4011	28.3681	70.5083	17.6013	40.4714	29.2956	36.2288	20.6766	PANK1	protein_coding
1388	ENSECAG00000011797	226.89	-0.519522	0.304611	-1.70552	0.0880969	0.885862	222.759	176.009	131.66	154.322	244.986	387.229	431.273	142.483	214.586	163.588	SOD2	protein_coding
1389	ENSECAG00000012840	42.1577	-0.55897	0.327054	-1.70911	0.0874309	0.885862	22.1593	33.803	37.9561	30.6375	45.4121	58.2197	55.6481	39.2828	54.0646	44.3939	PPP1R37	protein_coding
1390	ENSECAG00000015198	168.213	-0.455149	0.26694	-1.70506	0.0881836	0.885862	118.96	224.965	171.988	80.5653	112.335	219.339	212.475	152.471	168.882	220.145	CPM	protein_coding
1391	ENSECAG00000016107	6.76368	-1.90505	1.11579	-1.70736	0.0877559	0.885862	0	6.99373	7.11676	0	0	14.8934	21.5004	9.98715	1.6721	5.47322	TBKBP1	protein_coding
1392	ENSECAG00000016654	604.816	0.345894	0.202745	1.70605	0.0879979	0.885862	605.298	553.67	825.544	689.912	713.448	333.071	569.129	442.764	728.479	586.851	SRSF1	protein_coding
1393	ENSECAG00000016731	111.303	-0.470028	0.275271	-1.70751	0.087727	0.885862	83.9719	144.537	79.4705	69.2181	88.4341	131.333	165.68	141.152	79.7035	129.533	IREB2	protein_coding
1394	ENSECAG00000016987	25.181	-1.20569	0.706995	-1.70538	0.0881237	0.885862	0	31.4718	21.3503	14.7514	8.36539	55.5118	34.1477	10.653	11.7047	63.8542	NES	protein_coding
1395	ENSECAG00000019766	5.21628	-2.22031	1.29894	-1.70932	0.0873912	0.885862	0	0	0	9.07778	0	12.1855	15.1768	1.33162	8.91787	5.47322	EML1	protein_coding
1396	ENSECAG00000022444	79.0012	0.420456	0.246525	1.70553	0.0880952	0.885862	100.3	79.2623	80.6566	89.6431	100.385	86.6525	72.0896	68.5784	60.753	51.6915	DCAKD	protein_coding
1397	ENSECAG00000022695	1558.39	0.283615	0.16597	1.70883	0.087482	0.885862	1158.11	1615.55	1966.6	1894.99	1920.46	1565.16	1162.29	1619.25	1333.22	1348.24	MAP1A	protein_coding
1398	ENSECAG00000025897	10.975	-2.16456	1.26664	-1.7089	0.0874695	0.885862	1.16628	1.16562	1.18613	6.80834	9.56045	1.35395	72.0896	0	0	16.4197	U2	snRNA
1399	ENSECAG00000047348	8.05807	-1.70494	0.998284	-1.70787	0.0876612	0.885862	2.33255	4.66249	1.18613	1.13472	9.56045	6.76973	24.0299	18.6427	12.2621	0	0	protein_coding
1400	ENSECAG00000049416	11.6914	1.38166	0.808903	1.70807	0.0876228	0.885862	24.4918	5.82811	16.6058	5.67361	32.2665	9.47762	0	1.99743	14.4915	6.08135	0	lncRNA
1401	ENSECAG00000053960	3.47868	2.67665	1.56902	1.70594	0.0880192	0.885862	3.49883	4.66249	20.1642	1.13472	0	4.06184	1.26473	0	0	0	0	protein_coding
1402	ENSECAG00000059312	92.0451	0.702316	0.411583	1.70638	0.0879377	0.885862	74.6417	64.1092	170.802	113.472	149.382	39.2644	18.971	115.185	79.1461	95.4773	0	protein_coding
1403	ENSECAG00000012841	48.9761	-0.691763	0.405846	-1.7045	0.0882883	0.886281	13.9953	23.3124	69.9815	28.3681	51.3874	56.8657	80.9427	49.2699	59.0809	56.5566	PAIP2B	protein_coding
1404	ENSECAG00000012782	17.7243	-0.821308	0.481949	-1.70414	0.0883549	0.886318	11.6628	12.8218	8.30289	20.425	10.7555	17.6013	29.0888	23.9692	26.1962	16.4197	MICU3	protein_coding
1405	ENSECAG00000000383	2586.15	-0.23015	0.135138	-1.70307	0.0885543	0.886651	1849.71	2393.02	2227.55	2494.12	2937.45	2860.89	2649.61	2910.92	2670.9	2867.36	TOP1	protein_coding
1406	ENSECAG00000010290	3.70253	-2.8051	1.6472	-1.70295	0.088577	0.886651	0	1.16562	0	3.40417	0	10.8316	8.85311	0	0	12.7708	KCNS1	protein_coding
1407	ENSECAG00000015522	22.4134	-1.18565	0.696034	-1.70344	0.0884856	0.886651	11.6628	0	21.3503	14.7514	20.316	37.9105	54.3834	39.2828	5.0163	19.4603	0	protein_coding
1408	ENSECAG00000017593	75.9227	0.566158	0.332674	1.70184	0.088785	0.888102	103.799	96.7466	51.0035	88.5084	114.725	50.096	37.9419	89.2185	85.8345	41.3532	HMBS	protein_coding
1409	ENSECAG00000043529	2.14132	3.36658	1.97972	1.70054	0.0890295	0.889676	0	0	7.11676	6.80834	4.78022	2.70789	0	0	0	0	0	lncRNA
1410	ENSECAG00000053969	3.5162	-2.70631	1.59164	-1.70033	0.0890687	0.889676	1.16628	1.16562	1.18613	0	1.19506	1.35395	3.79419	25.3008	0	0	0	protein_coding
1411	ENSECAG00000009183	177.119	0.35584	0.209387	1.69944	0.0892365	0.89009	177.274	263.431	187.408	179.286	188.819	113.731	161.885	145.147	197.308	156.899	NCSTN	protein_coding
1412	ENSECAG00000014526	13.0345	-1.10362	0.649344	-1.69959	0.0892077	0.89009	10.4965	1.16562	14.2335	5.67361	9.56045	20.3092	26.5593	12.6504	7.80314	21.8929	PPIL6	protein_coding
1413	ENSECAG00000001892	37.3183	-0.62143	0.366668	-1.6948	0.0901126	0.890417	30.3232	22.1468	21.3503	24.9639	47.8022	54.1578	46.795	49.9358	30.0978	45.6102	PRPF38B	protein_coding
1414	ENSECAG00000003955	4.57274	-1.94156	1.14532	-1.69521	0.0900352	0.890417	0	5.82811	0	0	3.58517	10.8316	6.32365	9.98715	6.13104	3.04068	TRPV2	protein_coding
1415	ENSECAG00000006983	153.014	-0.426106	0.250991	-1.69769	0.0895657	0.890417	123.625	117.728	124.543	116.876	168.503	188.199	231.446	211.728	100.326	147.169	RAPGEF2	protein_coding
1416	ENSECAG00000011604	229.211	0.387595	0.228196	1.69852	0.0894096	0.890417	312.562	306.559	226.55	232.618	222.28	236.941	107.502	195.748	239.11	212.239	AOC2	protein_coding
1417	ENSECAG00000012583	204.589	0.330119	0.194535	1.69696	0.0897035	0.890417	230.923	235.456	240.784	223.54	210.33	121.855	216.269	167.118	219.603	180.008	0	protein_coding
1418	ENSECAG00000014429	1892.6	0.225746	0.132936	1.69815	0.0894788	0.890417	2542.48	2103.95	1884.76	1730.45	1940.77	1680.25	1790.86	1581.3	1883.9	1787.31	HNRNPH1	protein_coding
1419	ENSECAG00000018555	180.865	0.327543	0.193196	1.69539	0.0900013	0.890417	202.932	221.468	168.43	208.789	205.55	190.906	115.09	152.471	180.03	162.98	UBP1	protein_coding
1420	ENSECAG00000022391	9.38236	-1.51669	0.89516	-1.69432	0.0902038	0.890417	1.16628	13.9875	1.18613	7.94306	0	21.6631	3.79419	9.32134	18.9505	15.8115	DENND1A	protein_coding
1421	ENSECAG00000022785	43.6137	0.59285	0.349472	1.69642	0.0898073	0.890417	52.4824	64.1092	32.0254	72.6223	40.6319	37.9105	34.1477	37.9512	22.2947	41.9613	YJU2	protein_coding
1422	ENSECAG00000024666	38.5901	-0.767988	0.452568	-1.69696	0.0897051	0.890417	32.6557	23.3124	52.1896	12.482	21.511	43.3263	84.7369	57.2597	26.1962	32.2312	BCLAF3	protein_coding
1423	ENSECAG00000031061	4.89934	-2.2883	1.3494	-1.69579	0.0899252	0.890417	0	0	8.30289	0	0	9.47762	12.6473	11.3188	0.557367	6.68949	CCDC85B	protein_coding
1424	ENSECAG00000037848	5.8577	1.72065	1.01544	1.69449	0.0901721	0.890417	10.4965	3.49687	15.4197	2.26945	13.1456	2.70789	3.79419	0	0.557367	6.68949	0	protein_coding
1425	ENSECAG00000049873	2.53157	3.62641	2.13881	1.69553	0.0899755	0.890417	0	0	13.0474	0	9.56045	2.70789	0	0	0	0	0	protein_coding
1426	ENSECAG00000051390	4.18167	2.18014	1.28679	1.69425	0.0902176	0.890417	0	0	11.8613	4.53889	17.9258	1.35395	1.26473	0.66581	0.557367	3.64881	0	protein_coding
1427	ENSECAG00000052126	42.3687	0.889144	0.523815	1.69744	0.0896137	0.890417	146.951	54.7842	36.7699	18.1556	19.1209	27.0789	17.7062	28.6298	36.7862	37.7044	BRF2	protein_coding
1428	ENSECAG00000008644	61.83	0.500652	0.295644	1.69343	0.090374	0.890712	68.8103	52.453	54.5618	88.5084	96.7995	62.2815	54.3834	55.928	46.2615	38.3125	MEAK7	protein_coding
1429	ENSECAG00000013964	112.65	0.402281	0.237516	1.6937	0.0903225	0.890712	138.787	146.868	136.405	114.607	107.555	71.7591	73.3543	98.5399	124.293	114.329	CARNMT1	protein_coding
1430	ENSECAG00000046672	82.1717	-0.526659	0.311095	-1.69292	0.0904706	0.89104	52.4824	90.9185	59.3064	56.7361	76.4836	89.3604	131.532	126.504	49.6057	88.7878	0	protein_coding
1431	ENSECAG00000003332	129.104	-0.646379	0.382174	-1.69132	0.0907753	0.892182	41.986	113.065	97.2624	99.8556	149.382	246.418	252.946	69.2442	138.784	82.0983	H1-10	protein_coding
1432	ENSECAG00000003462	702.047	0.410036	0.242541	1.69058	0.0909162	0.892182	446.684	1246.05	824.358	946.359	543.751	513.146	518.539	647.167	552.351	782.062	RUNX1	protein_coding
1433	ENSECAG00000009424	26.4674	-1.06315	0.628747	-1.6909	0.0908561	0.892182	10.4965	4.66249	18.978	37.4459	13.1456	74.467	59.4423	16.6453	11.1473	18.2441	CCDC171	protein_coding
1434	ENSECAG00000017915	9.04874	-1.26744	0.749188	-1.69175	0.0906938	0.892182	8.16394	0	5.93064	7.94306	4.78022	5.41578	10.1178	13.982	18.9505	15.2034	TRIM36	protein_coding
1435	ENSECAG00000026906	110.523	-0.512973	0.303457	-1.69043	0.0909457	0.892182	144.618	82.7592	118.613	60.1403	48.9973	128.625	142.914	161.126	123.178	94.261	COX16	protein_coding
1436	ENSECAG00000028413	3.48099	-2.6636	1.57579	-1.69032	0.0909666	0.892182	0	0	1.18613	2.26945	1.19506	12.1855	12.6473	5.32648	0	0	0	snoRNA
1437	ENSECAG00000048404	4.21352	2.93729	1.73807	1.68997	0.0910338	0.89222	11.6628	3.49687	0	21.5597	0	5.41578	0	0	0	0	0	lncRNA
1438	ENSECAG00000020674	319.417	0.274335	0.162374	1.68953	0.0911185	0.892429	381.372	356.68	336.86	325.665	351.346	230.171	263.064	348.884	321.601	278.526	NDUFB3	protein_coding
1439	ENSECAG00000044844	27.9689	-0.705847	0.417895	-1.68906	0.0912088	0.892693	15.1616	23.3124	29.6532	12.482	25.0962	46.0342	39.2066	34.6221	20.0652	34.0556	0	protein_coding
1440	ENSECAG00000019963	170.721	-0.369268	0.218809	-1.68762	0.0914838	0.893521	176.108	134.047	124.543	119.146	190.014	205.8	225.122	187.093	207.898	137.439	STAM	protein_coding
1441	ENSECAG00000046766	29.7727	0.787341	0.466511	1.68772	0.0914644	0.893521	68.8103	37.2999	20.1642	32.907	29.8764	21.6631	11.3826	39.9486	15.6063	20.0685	0	lncRNA
1442	ENSECAG00000052258	4.08513	2.39571	1.41955	1.68765	0.0914781	0.893521	9.33021	0	9.48902	15.8861	0	0	0	1.33162	0.557367	4.25695	0	lncRNA
1443	ENSECAG00000006964	234.653	0.320187	0.189996	1.68523	0.0919444	0.895787	304.398	183.003	314.324	279.142	222.28	205.8	206.151	199.743	201.209	230.483	MPZL1	protein_coding
1444	ENSECAG00000016509	111.582	-0.541855	0.321558	-1.6851	0.0919701	0.895787	55.9813	104.906	112.682	57.8709	121.896	116.439	223.857	77.234	128.194	116.762	PROS1	protein_coding
1445	ENSECAG00000017856	50.0961	-0.681522	0.404372	-1.68538	0.0919147	0.895787	22.1593	41.9624	41.5144	52.1973	33.4616	79.8828	86.0016	83.2263	29.5404	31.0149	ZNF839	protein_coding
1446	ENSECAG00000024826	64.3515	0.459503	0.27253	1.68606	0.0917838	0.895787	64.1452	62.9436	64.0509	72.6223	108.75	52.8039	58.1776	47.2725	57.4088	55.3403	ZBTB17	protein_coding
1447	ENSECAG00000009136	365.023	0.546536	0.324602	1.68371	0.0922374	0.897768	275.241	540.849	705.746	465.236	180.453	128.625	407.243	329.576	313.798	303.46	PRXL2A	protein_coding
1448	ENSECAG00000013135	240.245	0.339091	0.201542	1.68249	0.0924748	0.897791	228.59	234.29	397.353	262.121	218.695	236.941	208.68	185.761	219.603	210.415	PLS3	protein_coding
1449	ENSECAG00000015809	370.568	-0.459092	0.27287	-1.68245	0.0924807	0.897791	141.119	318.215	409.214	331.339	359.712	437.325	567.864	348.884	545.105	246.903	ZBTB20	protein_coding
1450	ENSECAG00000046524	4817.08	0.154899	0.0920712	1.68238	0.0924947	0.897791	5227.25	4821.01	5296.06	5060.86	4971.43	4755.06	4426.56	4418.32	4588.24	4606.02	CD63	protein_coding
1451	ENSECAG00000049477	2.96819	2.89653	1.72167	1.68239	0.0924928	0.897791	0	2.33124	1.18613	11.3472	10.7555	4.06184	0	0	0	0	0	lncRNA
1452	ENSECAG00000003318	12.6041	1.10105	0.654696	1.68177	0.0926136	0.898326	17.4941	13.9875	14.2335	14.7514	25.0962	12.1855	7.58838	2.66324	2.22947	15.8115	VIT	protein_coding
1453	ENSECAG00000032958	21.277	-0.867921	0.516373	-1.6808	0.0928012	0.898907	9.33021	22.1468	21.3503	12.482	9.56045	18.9552	54.3834	14.6478	26.1962	23.7173	FBXO46	protein_coding
1454	ENSECAG00000059247	2.14722	3.3689	2.00405	1.68105	0.0927534	0.898907	3.49883	0	11.8613	3.40417	0	2.70789	0	0	0	0	0	lncRNA
1455	ENSECAG00000009702	1106.83	0.254796	0.151635	1.68033	0.092894	0.89896	1039.15	1360.28	988.044	1363.94	1273.93	901.728	833.457	1040	1134.8	1132.96	ACLY	protein_coding
1456	ENSECAG00000018055	5.57651	-1.90334	1.13322	-1.67958	0.093039	0.89896	9.33021	0	1.18613	1.13472	0	8.12368	17.7062	8.65553	1.11473	8.5139	CELF5	protein_coding
1457	ENSECAG00000024130	133.616	-0.364149	0.216867	-1.67914	0.0931257	0.89896	139.953	120.059	118.613	108.933	95.6045	177.367	144.179	178.437	113.145	139.871	ZNF609	protein_coding
1458	ENSECAG00000026930	902.981	0.344942	0.205382	1.67951	0.0930522	0.89896	1218.76	983.785	1116.15	847.638	887.927	582.197	841.045	739.049	1223.98	589.283	SEC61B	protein_coding
1459	ENSECAG00000048310	3.90094	2.50068	1.48907	1.67935	0.0930837	0.89896	6.99766	18.65	1.18613	5.67361	0	2.70789	3.79419	0	0	0	0	lncRNA
1460	ENSECAG00000021867	28.2346	0.752353	0.448379	1.67794	0.0933591	0.900595	50.1499	32.6374	40.3283	37.4459	16.7308	20.3092	17.7062	37.9512	14.4915	14.5953	MRPS7	protein_coding
1461	ENSECAG00000042379	87.0792	0.543159	0.32378	1.67756	0.0934336	0.900697	128.29	93.2498	139.963	71.4875	84.849	46.0342	59.4423	127.836	61.8677	57.7729	MRPS36	protein_coding
1462	ENSECAG00000055679	3.58354	-1.77954	1.06123	-1.67688	0.0935667	0.901363	1.16628	3.49687	1.18613	2.26945	0	4.06184	5.05892	4.66067	7.24577	6.68949	0	lncRNA
1463	ENSECAG00000010862	218.28	-0.518996	0.309626	-1.6762	0.0936981	0.902012	125.958	193.493	218.247	184.96	172.088	341.194	426.214	149.807	114.818	256.025	TNIP1	protein_coding
1464	ENSECAG00000010874	267.268	0.344341	0.205471	1.67586	0.0937651	0.90204	265.911	231.959	289.415	330.204	375.248	222.047	325.036	224.378	175.571	232.916	HGS	protein_coding
1465	ENSECAG00000021610	386.114	-0.294534	0.17584	-1.67502	0.0939312	0.903022	380.206	355.515	354.652	397.153	244.986	444.094	478.068	408.142	335.535	462.791	GPBP1	protein_coding
1466	ENSECAG00000006400	121.749	-0.393595	0.235128	-1.67396	0.0941382	0.903163	72.3091	127.053	75.9121	133.897	117.115	136.749	134.061	138.488	129.866	152.034	TOX4	protein_coding
1467	ENSECAG00000045464	187.643	-0.364627	0.217756	-1.67447	0.0940377	0.903163	202.932	152.696	170.802	144.11	148.187	234.233	254.211	195.748	239.11	134.398	0	lncRNA
1468	ENSECAG00000058666	6.2024	-1.6057	0.959201	-1.674	0.0941301	0.903163	0	6.99373	4.74451	0	3.58517	13.5395	7.58838	7.98972	13.9342	3.64881	0	lncRNA
1469	ENSECAG00000013922	127.227	-0.352898	0.210999	-1.67251	0.094423	0.9041	111.963	117.728	86.5873	110.068	131.456	155.704	149.238	146.478	109.801	153.25	PRRC2B	protein_coding
1470	ENSECAG00000017103	71.8513	-0.570971	0.34141	-1.67239	0.0944478	0.9041	52.4824	36.1343	58.1202	48.7931	92.0193	124.563	112.561	82.5604	60.1956	51.0834	BUB1	protein_coding
1471	ENSECAG00000022581	87.2842	0.496527	0.296926	1.67222	0.0944802	0.9041	102.632	122.39	84.215	81.7	121.896	43.3263	63.2365	98.5399	101.998	52.9078	ACP6	protein_coding
1472	ENSECAG00000048447	4.03331	-2.52529	1.5102	-1.67216	0.0944928	0.9041	0	0	2.37225	1.13472	2.39011	20.3092	6.32365	0	7.80314	0	0	protein_coding
1473	ENSECAG00000044031	2.93897	2.19904	1.31583	1.67122	0.0946781	0.905259	3.49883	6.99373	8.30289	2.26945	2.39011	4.06184	1.26473	0	0	0.608135	0	lncRNA
1474	ENSECAG00000016645	35.8608	-0.667965	0.399884	-1.67039	0.0948414	0.906205	22.1593	26.8093	41.5144	31.7722	15.5357	54.1578	56.9129	22.6375	38.4583	48.6508	MCOLN1	protein_coding
1475	ENSECAG00000011382	49.3885	0.637514	0.381784	1.66983	0.0949531	0.906518	78.1405	30.3062	35.5838	90.7778	65.7281	35.2026	45.5303	30.6273	54.622	27.3661	CCNDBP1	protein_coding
1476	ENSECAG00000040131	19.9082	-0.868286	0.520063	-1.66958	0.0950029	0.906518	6.99766	24.4781	17.7919	14.7514	5.97528	39.2644	25.2946	25.9666	23.9668	14.5953	KLK11	protein_coding
1477	ENSECAG00000000624	215.993	-0.424885	0.254634	-1.66861	0.0951944	0.907016	146.951	207.481	148.266	212.193	204.355	307.346	370.566	165.787	161.636	235.348	PTPN2	protein_coding
1478	ENSECAG00000002986	153.182	-0.450074	0.269888	-1.66764	0.0953882	0.907016	134.122	82.7592	202.828	120.281	106.36	159.766	259.27	131.83	152.161	182.441	GHR	protein_coding
1479	ENSECAG00000008278	177.931	0.366081	0.219599	1.66704	0.0955059	0.907016	173.775	149.2	198.083	180.421	299.959	162.474	159.356	174.442	133.211	148.385	ZNF84	protein_coding
1480	ENSECAG00000016537	3.56651	-2.31515	1.38864	-1.66721	0.0954721	0.907016	0	0	5.93064	0	0	6.76973	11.3826	2.66324	2.22947	6.68949	IL12RB2	protein_coding
1481	ENSECAG00000020448	29.6329	-0.913622	0.547485	-1.66876	0.0951645	0.907016	16.3279	1.16562	21.3503	36.3111	27.4863	28.4329	56.9129	23.9692	35.1141	49.259	UBE2T	protein_coding
1482	ENSECAG00000020819	2.28099	2.8592	1.71432	1.66783	0.0953498	0.907016	0	1.16562	2.37225	13.6167	2.39011	2.70789	0	0	0.557367	0	AGER	protein_coding
1483	ENSECAG00000023271	127.949	0.432164	0.259209	1.66724	0.095466	0.907016	118.96	145.703	157.755	121.415	193.599	77.1749	89.7958	105.864	168.882	100.342	ASCC2	protein_coding
1484	ENSECAG00000014243	3.92235	-2.51906	1.51239	-1.66562	0.0957892	0.907871	1.16628	0	2.37225	1.13472	1.19506	8.12368	1.26473	0	23.9668	0	GATM	protein_coding
1485	ENSECAG00000015859	25.8215	0.751881	0.451376	1.66575	0.0957625	0.907871	25.6581	32.6374	29.6532	28.3681	46.6072	18.9552	7.58838	31.9589	23.4094	13.379	PAFAH2	protein_coding
1486	ENSECAG00000019879	253.571	0.278907	0.16743	1.66581	0.095751	0.907871	344.052	268.093	265.692	236.022	276.058	212.57	247.887	241.023	202.882	241.43	ISCU	protein_coding
1487	ENSECAG00000009796	63.5441	0.557988	0.335127	1.665	0.0959123	0.908426	72.3091	80.4279	79.4705	95.3167	51.3874	64.9894	22.7651	74.5707	40.6878	53.5159	FER	protein_coding
1488	ENSECAG00000018671	4.46776	-1.72655	1.03728	-1.6645	0.0960117	0.908756	1.16628	0	1.18613	6.80834	1.19506	8.12368	3.79419	5.32648	6.13104	10.9464	DNAJB13	protein_coding
1489	ENSECAG00000052711	286.286	-0.380673	0.228807	-1.66373	0.0961667	0.909612	407.031	180.671	231.295	240.561	184.039	287.037	369.301	279.64	316.584	366.706	0	lncRNA
1490	ENSECAG00000002562	94.4259	0.549689	0.330654	1.66243	0.0964268	0.910061	33.822	139.875	150.638	124.82	112.335	77.1749	64.5012	70.5759	84.1624	86.3552	PGAP4	protein_coding
1491	ENSECAG00000003182	16.3877	-0.800936	0.481697	-1.66274	0.0963649	0.910061	13.9953	10.4906	14.2335	12.482	8.36539	18.9552	27.8241	15.9794	24.5241	17.0278	PDXP	protein_coding
1492	ENSECAG00000013737	347.894	0.241819	0.145425	1.66285	0.0963434	0.910061	328.89	382.324	371.258	430.06	372.857	303.284	317.447	352.214	290.388	330.218	MRPL11	protein_coding
1493	ENSECAG00000016566	4.43935	-2.12839	1.28047	-1.6622	0.0964727	0.910061	0	0	5.93064	1.13472	1.19506	6.76973	10.1178	8.65553	10.59	0	TEK	protein_coding
1494	ENSECAG00000024262	320.88	0.399457	0.240426	1.66145	0.0966225	0.910864	557.48	411.465	276.368	302.971	279.643	220.693	196.033	270.319	334.42	359.408	PGM1	protein_coding
1495	ENSECAG00000002113	25.5327	-0.989439	0.596146	-1.65973	0.0969696	0.911179	4.66511	8.15935	24.9087	37.4459	9.56045	73.1131	35.4124	22.6375	21.1799	18.2441	BARD1	protein_coding
1496	ENSECAG00000007373	7.3395	2.14928	1.29578	1.65867	0.0971815	0.911179	16.3279	16.3187	3.55838	23.8292	0	2.70789	0	10.653	0	0	SHTN1	protein_coding
1497	ENSECAG00000010746	48.3074	-0.535442	0.322625	-1.65964	0.0969868	0.911179	45.4848	22.1468	34.3977	46.5236	47.8022	66.3434	68.2954	53.2648	43.4746	55.3403	RAD18	protein_coding
1498	ENSECAG00000016058	79.8378	0.436805	0.263245	1.65931	0.0970528	0.911179	67.644	124.722	84.215	90.7778	92.0193	75.821	58.1776	55.2622	85.2771	64.4624	CARS2	protein_coding
1499	ENSECAG00000018837	186.607	0.33425	0.201551	1.65839	0.0972381	0.911179	281.073	189.996	208.758	173.613	187.624	143.518	177.062	197.746	164.981	141.696	YIPF4	protein_coding
1500	ENSECAG00000021712	3.88898	2.52413	1.52169	1.65877	0.0971618	0.911179	0	0	26.0948	0	7.17034	1.35395	0	1.33162	1.11473	1.82441	EYA2	protein_coding
1501	ENSECAG00000024684	788.954	0.203296	0.122462	1.66008	0.0968992	0.911179	912.028	730.845	826.731	935.012	818.613	697.282	733.543	752.365	769.166	713.951	ATP5F1C	protein_coding
1502	ENSECAG00000038427	3.00474	-2.88963	1.74193	-1.65887	0.0971419	0.911179	0	0	2.37225	0	1.19506	5.41578	10.1178	0	0	10.9464	RASD2	protein_coding
1503	ENSECAG00000057387	7.55834	2.02347	1.21985	1.65879	0.0971587	0.911179	4.66511	1.16562	27.2809	17.0208	9.56045	10.8316	5.05892	0	0	0	0	lncRNA
1504	ENSECAG00000009640	70.4239	0.555994	0.335328	1.65806	0.0973056	0.911205	82.8056	92.0841	98.4485	34.0417	112.335	46.0342	56.9129	82.5604	54.622	44.3939	TADA1	protein_coding
1505	ENSECAG00000022197	114.905	-0.531656	0.320745	-1.65757	0.0974051	0.91153	75.808	123.556	134.032	69.2181	68.1182	58.2197	166.944	189.09	145.473	118.586	CASP3	protein_coding
1506	ENSECAG00000000595	195.769	-0.392489	0.237041	-1.65579	0.0977652	0.914293	110.796	153.862	201.642	208.789	173.283	200.384	142.914	290.293	238.553	237.173	SLC30A9	protein_coding
1507	ENSECAG00000019317	60.6364	-0.542	0.327443	-1.65525	0.0978737	0.914441	71.1429	24.4781	39.1422	52.1973	59.7528	64.9894	88.5311	56.5939	87.5066	62.0298	NCK2	protein_coding
1508	ENSECAG00000055107	2.1438	3.36427	2.03271	1.65507	0.0979109	0.914441	1.16628	0	0	6.80834	10.7555	2.70789	0	0	0	0	0	protein_coding
1509	ENSECAG00000007422	50.9136	0.518205	0.313772	1.65153	0.0986298	0.914485	80.4731	33.803	65.237	54.4667	65.7281	44.6802	39.2066	49.9358	37.9009	37.7044	DENND4B	protein_coding
1510	ENSECAG00000008062	117.676	0.430152	0.260232	1.65296	0.0983398	0.914485	148.117	146.868	156.569	104.395	121.896	92.0683	61.9718	85.2237	147.145	112.505	DDHD2	protein_coding
1511	ENSECAG00000008072	117.674	-0.442316	0.267499	-1.65352	0.0982242	0.914485	83.9719	100.243	138.777	96.4514	77.6786	166.535	177.062	105.864	143.801	86.3552	RSBN1	protein_coding
1512	ENSECAG00000011036	100.853	-0.416516	0.251802	-1.65414	0.0980994	0.914485	79.3068	114.231	90.1457	93.0473	56.1676	116.439	82.2075	131.165	125.408	120.411	NRBF2	protein_coding
1513	ENSECAG00000018673	81.3924	-0.509481	0.308349	-1.65229	0.0984758	0.914485	55.9813	92.0841	46.259	85.1042	54.9726	105.608	135.326	82.5604	56.2941	99.7342	JAK1	protein_coding
1514	ENSECAG00000018696	3.22019	-2.51478	1.52215	-1.65212	0.0985106	0.914485	0	0	4.74451	0	0	9.47762	10.1178	0.66581	1.11473	6.08135	PDE2A	protein_coding
1515	ENSECAG00000019781	340.644	0.570121	0.344831	1.65333	0.0982631	0.914485	120.126	279.749	817.242	456.159	363.297	250.48	190.974	273.648	269.208	385.558	SERPINE1	protein_coding
1516	ENSECAG00000024784	83.7873	-0.46573	0.281864	-1.65232	0.0984696	0.914485	45.4848	61.778	79.4705	87.3737	76.4836	120.501	113.826	95.2108	97.5392	60.2054	ING4	protein_coding
1517	ENSECAG00000044972	64.9135	0.529212	0.320033	1.65362	0.0982053	0.914485	57.1476	41.9624	88.9595	74.8917	119.506	63.6355	59.4423	45.9409	42.9173	54.7322	0	lncRNA
1518	ENSECAG00000053235	3.11455	2.50322	1.51555	1.65169	0.0985981	0.914485	5.83138	0	3.55838	5.67361	10.7555	4.06184	1.26473	0	0	0	0	lncRNA
1519	ENSECAG00000055807	13.5262	-1.41996	0.859047	-1.65294	0.0983427	0.914485	1.16628	6.99373	8.30289	1.13472	19.1209	23.0171	26.5593	25.3008	0.557367	23.1091	CAVIN2	protein_coding
1520	ENSECAG00000059309	2.18991	2.525	1.52939	1.65099	0.0987416	0.914919	5.83138	1.16562	1.18613	5.67361	4.78022	0	1.26473	1.99743	0	0	0	lncRNA
1521	ENSECAG00000018631	18.8857	1.10086	0.666933	1.65063	0.0988146	0.914944	11.6628	16.3187	33.2116	44.2542	23.9011	13.5395	0	24.635	6.13104	15.2034	LTBP2	protein_coding
1522	ENSECAG00000038536	31.2864	1.05745	0.64075	1.65034	0.0988742	0.914944	11.6628	9.32498	136.405	26.0986	27.4863	20.3092	29.0888	13.3162	10.59	28.5824	CCND1	protein_coding
1523	ENSECAG00000009773	194.651	-0.459977	0.278857	-1.64951	0.0990431	0.915905	144.618	163.187	113.868	107.799	290.399	255.896	161.885	294.954	229.635	184.265	ABCG2	protein_coding
1524	ENSECAG00000016469	1108.1	-0.284842	0.172749	-1.64888	0.0991723	0.916498	770.909	1125.99	837.406	1017.85	1240.47	1570.58	1235.64	979.407	1124.21	1178.57	DST	protein_coding
1525	ENSECAG00000008702	3.2126	2.58579	1.56874	1.64833	0.0992857	0.916775	17.4941	2.33124	2.37225	0	4.78022	1.35395	3.79419	0	0	0	0	protein_coding
1526	ENSECAG00000013751	624.363	0.313638	0.190388	1.64736	0.0994848	0.916775	952.848	707.533	693.884	579.843	528.215	430.555	536.246	514.005	584.121	716.384	TM9SF3	protein_coding
1527	ENSECAG00000019950	52.7762	-0.635317	0.385787	-1.6468	0.0995982	0.916775	67.644	44.2936	18.978	45.3889	29.8764	56.8657	89.7958	61.2545	33.9994	79.6657	RALGAPA2	protein_coding
1528	ENSECAG00000022635	197.915	-0.336271	0.204169	-1.64703	0.0995528	0.916775	194.768	212.143	129.288	145.245	192.404	281.621	187.18	219.052	203.996	213.456	HERC1	protein_coding
1529	ENSECAG00000022970	27.2587	0.713331	0.433048	1.64723	0.0995104	0.916775	41.986	33.803	37.9561	22.6945	33.4616	8.12368	29.0888	14.6478	29.5404	21.2847	RAB32	protein_coding
1530	ENSECAG00000024209	142.963	0.447662	0.271885	1.64651	0.0996579	0.916775	241.419	143.372	124.543	169.074	149.382	74.467	88.5311	120.512	150.489	167.845	TMEM120A	protein_coding
1531	ENSECAG00000034395	212.69	0.851379	0.517063	1.64657	0.0996471	0.916775	88.637	430.115	111.496	386.94	351.346	146.226	154.297	62.5861	173.898	221.361	0	protein_coding
1532	ENSECAG00000015333	7.69975	-2.15215	1.30765	-1.64581	0.0998027	0.916798	1.16628	10.4906	1.18613	0	1.19506	18.9552	24.0299	19.9743	0	0	ADAP2	protein_coding
1533	ENSECAG00000018267	154.737	-0.510076	0.309853	-1.64618	0.0997259	0.916798	96.801	116.562	136.405	140.706	145.797	247.772	273.182	67.9126	154.391	167.845	CENPC	protein_coding
1534	ENSECAG00000021208	204.829	-0.342595	0.208194	-1.64555	0.0998558	0.916798	165.611	216.806	208.758	116.876	193.599	253.188	270.652	193.085	216.258	213.456	RC3H1	protein_coding
1535	ENSECAG00000012126	679.744	-0.269891	0.164112	-1.64455	0.100062	0.918097	429.19	645.755	642.881	704.663	657.281	751.44	881.517	770.342	665.496	648.88	RASAL2	protein_coding
1536	ENSECAG00000005172	9.49986	-1.32404	0.805631	-1.64348	0.100284	0.918763	4.66511	0	4.74451	5.67361	11.9506	17.6013	12.6473	25.3008	3.90157	8.5139	SMIM33	protein_coding
1537	ENSECAG00000010296	10.0103	1.16768	0.710633	1.64315	0.100351	0.918763	8.16394	2.33124	15.4197	19.2903	23.9011	5.41578	8.85311	5.32648	8.3605	3.04068	ODF3B	protein_coding
1538	ENSECAG00000020453	131.789	0.355808	0.216568	1.64294	0.100396	0.918763	152.782	179.506	115.054	149.783	143.407	102.9	120.149	90.5502	142.129	121.627	MAPKAP1	protein_coding
1539	ENSECAG00000037742	663.946	0.284669	0.173192	1.64366	0.100246	0.918763	731.255	582.811	667.79	878.276	787.542	620.107	460.362	741.047	504.974	665.3	0	protein_coding
1540	ENSECAG00000016769	10.2118	1.12527	0.685532	1.64146	0.100702	0.91938	17.4941	6.99373	24.9087	6.80834	14.3407	2.70789	5.05892	13.3162	5.0163	5.47322	TAF4B	protein_coding
1541	ENSECAG00000017836	595.917	-0.33232	0.202453	-1.64147	0.1007	0.91938	396.534	466.249	507.662	565.092	701.498	769.041	639.953	820.278	667.168	425.695	ARID4B	protein_coding
1542	ENSECAG00000050266	30.7722	0.724453	0.441294	1.64166	0.100661	0.91938	25.6581	65.2748	45.0728	30.6375	25.0962	25.725	21.5004	18.6427	37.3436	12.7708	0	protein_coding
1543	ENSECAG00000055546	2.19057	-3.66587	2.23345	-1.64135	0.100725	0.91938	0	0	0	1.13472	0	8.12368	12.6473	0	0	0	0	lncRNA
1544	ENSECAG00000011019	8.60962	1.4198	0.865421	1.64059	0.100882	0.919949	1.16628	18.65	27.2809	4.53889	10.7555	5.41578	6.32365	5.32648	0.557367	6.08135	KCNAB3	protein_coding
1545	ENSECAG00000027835	616.594	-0.416083	0.253644	-1.64042	0.100917	0.919949	492.169	628.27	527.827	479.988	510.289	835.385	1153.43	343.558	707.299	487.725	LRATD1	protein_coding
1546	ENSECAG00000008700	3.40796	-2.27874	1.38954	-1.63992	0.101022	0.920308	0	0	1.18613	4.53889	0	4.06184	12.6473	8.65553	0.557367	2.43254	MDGA1	protein_coding
1547	ENSECAG00000006067	17.5985	-1.03924	0.634211	-1.63863	0.10129	0.921297	29.1569	3.49687	13.0474	1.13472	10.7555	24.371	25.2946	25.3008	23.9668	19.4603	USP31	protein_coding
1548	ENSECAG00000041007	15.8781	-1.06786	0.651749	-1.63845	0.101327	0.921297	17.4941	9.32498	4.74451	15.8861	3.58517	43.3263	5.05892	25.9666	13.9342	19.4603	0	lncRNA
1549	ENSECAG00000045148	8.24166	1.96145	1.19671	1.63903	0.101206	0.921297	27.9906	8.15935	2.37225	26.0986	1.19506	1.35395	1.26473	13.982	0	0	0	protein_coding
1550	ENSECAG00000007363	38.3139	-0.609096	0.372382	-1.63568	0.101907	0.921781	30.3232	17.4843	27.2809	32.907	43.022	58.2197	53.1187	50.6016	44.032	26.1498	ZFYVE9	protein_coding
1551	ENSECAG00000010127	57.628	-0.602013	0.368065	-1.63562	0.10192	0.921781	19.8267	37.2999	48.6312	56.7361	65.7281	94.7762	65.766	83.2263	36.7862	67.503	INSR	protein_coding
1552	ENSECAG00000010400	89.7522	0.507793	0.310241	1.63677	0.101679	0.921781	149.283	163.187	75.9121	55.6014	82.4589	78.5289	80.9427	71.2417	74.6872	65.6786	CLN5	protein_coding
1553	ENSECAG00000013755	54.0253	-0.548222	0.334961	-1.63667	0.101699	0.921781	38.4871	38.4655	39.1422	44.2542	57.3627	78.5289	102.443	46.6067	45.7041	49.259	ZBTB44	protein_coding
1554	ENSECAG00000015489	101.893	-0.363144	0.221853	-1.63687	0.101658	0.921781	76.9743	96.7466	111.496	70.3528	89.6292	117.793	125.208	103.866	106.457	120.411	UPRT	protein_coding
1555	ENSECAG00000019505	403.695	-0.29486	0.180301	-1.63538	0.101969	0.921781	325.391	307.724	313.138	418.713	445.756	500.96	498.304	498.026	362.846	366.098	PAWR	protein_coding
1556	ENSECAG00000022054	24.1131	-0.933971	0.570957	-1.6358	0.101882	0.921781	19.8267	20.9812	3.55838	23.8292	14.3407	20.3092	60.707	9.32134	38.4583	29.7986	CLSTN2	protein_coding
1557	ENSECAG00000024374	7.11789	1.81813	1.11042	1.63733	0.101561	0.921781	3.49883	10.4906	7.11676	1.13472	33.4616	2.70789	1.26473	0	0.557367	10.9464	ERBB3	protein_coding
1558	ENSECAG00000049030	2.61916	-2.68556	1.64173	-1.6358	0.10188	0.921781	3.49883	0	0	0	0	5.41578	6.32365	0.66581	0.557367	9.73017	0	protein_coding
1559	ENSECAG00000021486	43.3086	-0.562284	0.343936	-1.63485	0.10208	0.922193	38.4871	34.9687	26.0948	39.7153	34.6566	63.6355	59.4423	64.5836	29.5404	41.9613	RBSN	protein_coding
1560	ENSECAG00000010545	12.5864	1.06021	0.648973	1.63367	0.102329	0.923251	3.49883	13.9875	16.6058	29.5028	21.511	8.12368	7.58838	5.99229	4.45894	14.5953	TTC39C	protein_coding
1561	ENSECAG00000038175	61.0279	0.497383	0.304423	1.63386	0.102289	0.923251	107.297	58.2811	60.4925	62.4098	69.3133	48.7421	46.795	34.6221	65.7693	56.5566	FAM219A	protein_coding
1562	ENSECAG00000000690	58.0753	-0.452698	0.277421	-1.63181	0.10272	0.924415	39.6534	57.1155	55.748	44.2542	47.8022	66.3434	83.4722	51.2674	65.7693	69.3274	MLH1	protein_coding
1563	ENSECAG00000009074	222.455	-0.329158	0.201649	-1.63233	0.10261	0.924415	174.941	238.953	175.547	183.825	210.33	272.143	323.771	183.764	250.258	211.023	AUTS2	protein_coding
1564	ENSECAG00000009878	104.232	-0.405381	0.248287	-1.63271	0.10253	0.924415	74.6417	104.906	67.6092	78.2959	121.896	132.687	136.591	125.838	109.244	90.6122	CYTH2	protein_coding
1565	ENSECAG00000016405	43.7266	-0.772478	0.473374	-1.63185	0.10271	0.924415	44.3185	27.9749	15.4197	31.7722	40.6319	83.9447	103.708	24.635	42.3599	22.501	REPIN1	protein_coding
1566	ENSECAG00000013766	89.6454	0.445216	0.273009	1.63078	0.102938	0.925191	99.1335	96.7466	92.5179	145.245	83.6539	75.821	70.8249	49.9358	105.342	77.2332	E2F5	protein_coding
1567	ENSECAG00000056929	2.41832	3.54953	2.17652	1.63083	0.102927	0.925191	0	0	4.74451	0	16.7308	2.70789	0	0	0	0	0	lncRNA
1568	ENSECAG00000000960	3.98208	-2.54084	1.56293	-1.62568	0.104017	0.925385	0	0	3.55838	2.26945	0	13.5395	0	12.6504	7.80314	0	PNMA5	protein_coding
1569	ENSECAG00000006428	42.3215	0.522591	0.320779	1.62913	0.103285	0.925385	46.6511	46.6249	55.748	46.5236	54.9726	29.7868	30.3535	24.635	42.9173	45.002	ARMC6	protein_coding
1570	ENSECAG00000007707	378.794	-0.30977	0.19083	-1.62327	0.104531	0.925385	327.724	441.771	342.791	343.821	233.036	461.696	507.157	350.882	360.059	419.005	PIP4K2A	protein_coding
1571	ENSECAG00000010025	101.902	0.592619	0.364497	1.62585	0.103981	0.925385	53.6487	75.7654	236.039	135.032	113.53	56.8657	61.9718	110.524	67.9988	107.64	GPC3	protein_coding
1572	ENSECAG00000010553	6.29965	-1.64595	1.01165	-1.62699	0.10374	0.925385	0	0	1.18613	4.53889	9.56045	8.12368	10.1178	7.32391	3.90157	18.2441	NGF	protein_coding
1573	ENSECAG00000010644	1349.69	0.346226	0.21347	1.6219	0.104825	0.925385	2283.57	1429.05	1145.8	1416.13	1281.1	1196.89	875.193	1751.75	1049.52	1067.89	VCP	protein_coding
1574	ENSECAG00000013454	289.804	-0.284982	0.175508	-1.62375	0.104428	0.925385	289.237	235.456	232.481	240.561	307.129	380.459	306.065	310.267	249.143	347.245	NDUFS3	protein_coding
1575	ENSECAG00000013508	1355.7	0.245152	0.151213	1.62123	0.104967	0.925385	1724.92	1529.3	1282.2	1495.56	1325.32	1073.68	1035.81	1155.18	1466.99	1468.04	SAP18	protein_coding
1576	ENSECAG00000015019	40.9524	-0.570058	0.350133	-1.62812	0.1035	0.925385	30.3232	40.7968	35.5838	26.0986	31.0715	70.4052	51.8539	28.6298	41.2452	53.5159	PIK3CA	protein_coding
1577	ENSECAG00000015165	1931.67	-0.232011	0.142961	-1.6229	0.104611	0.925385	2331.39	1840.52	1528.92	1530.74	1650.37	2289.52	2115.89	1950.16	2098.49	1980.7	TMED9	protein_coding
1578	ENSECAG00000015379	9.02819	-1.05223	0.647569	-1.62489	0.104186	0.925385	5.83138	5.82811	3.55838	6.80834	7.17034	16.2474	12.6473	5.99229	12.8194	13.379	FGD4	protein_coding
1579	ENSECAG00000017033	3.12095	2.21023	1.35667	1.62916	0.10328	0.925385	8.16394	0	2.37225	3.40417	11.9506	0	1.26473	0	2.22947	1.82441	FBXW5	protein_coding
1580	ENSECAG00000018403	3.76223	2.47071	1.51576	1.63002	0.103098	0.925385	0	1.16562	5.93064	3.40417	21.511	1.35395	0	0	0	4.25695	DOC2A	protein_coding
1581	ENSECAG00000018796	28.0208	0.715286	0.441158	1.62138	0.104936	0.925385	37.3209	22.1468	37.9561	24.9639	52.5825	12.1855	18.971	37.9512	17.2784	18.8522	DGKZ	protein_coding
1582	ENSECAG00000019369	18.6737	-0.800448	0.491793	-1.62761	0.103608	0.925385	6.99766	12.8218	16.6058	19.2903	11.9506	23.0171	36.6772	17.9769	26.1962	15.2034	CCNF	protein_coding
1583	ENSECAG00000019394	56.2873	-0.894984	0.550689	-1.62521	0.104118	0.925385	29.1569	106.072	40.3283	18.1556	3.58517	54.1578	41.7361	71.2417	91.4082	107.032	ACAA2	protein_coding
1584	ENSECAG00000019646	452.216	-0.282565	0.173874	-1.62511	0.104138	0.925385	320.726	331.037	394.98	492.47	499.533	521.269	564.07	496.694	479.336	422.046	AHI1	protein_coding
1585	ENSECAG00000020459	316.017	0.321107	0.198117	1.62079	0.105062	0.925385	461.846	315.884	247.901	405.096	326.25	238.295	261.799	262.329	289.273	351.502	SEC13	protein_coding
1586	ENSECAG00000020522	30.6247	-0.980812	0.603357	-1.62559	0.104037	0.925385	5.83138	15.1531	46.259	2.26945	33.4616	24.371	68.2954	31.9589	31.2125	47.4346	PRIMPOL	protein_coding
1587	ENSECAG00000020820	56.5004	0.564959	0.348264	1.62221	0.104758	0.925385	67.644	45.4593	56.9341	71.4875	96.7995	50.096	21.5004	45.2751	69.6709	40.1369	TBK1	protein_coding
1588	ENSECAG00000022024	724.415	0.286658	0.17659	1.6233	0.104526	0.925385	1077.64	758.82	797.077	654.735	695.523	559.18	570.393	609.216	841.067	680.504	RBM8A	protein_coding
1589	ENSECAG00000023721	329.031	0.279216	0.172269	1.62082	0.105056	0.925385	341.719	303.062	393.794	360.842	401.539	292.452	390.802	266.324	249.7	290.081	OGT	protein_coding
1590	ENSECAG00000027671	6574.34	0.842138	0.517197	1.62827	0.103467	0.925385	16038.6	2741.54	13786.4	6497.42	3138.22	6869.92	2721.7	3683.93	4943.29	5322.4	MT-ATP6	protein_coding
1591	ENSECAG00000037138	443.353	-0.203064	0.125283	-1.62084	0.105051	0.925385	419.86	397.477	415.144	405.096	421.855	521.269	471.744	447.424	472.09	461.575	ATP6V1G1	protein_coding
1592	ENSECAG00000046499	8.86719	1.82047	1.12026	1.62504	0.104155	0.925385	13.9953	4.66249	14.2335	12.482	22.7061	5.41578	15.1768	0	0	0	0	protein_coding
1593	ENSECAG00000049468	69.3306	0.50278	0.308636	1.62904	0.103305	0.925385	65.3115	90.9185	115.054	68.0834	68.1182	54.1578	39.2066	90.5502	49.6057	52.2996	0	protein_coding
1594	ENSECAG00000049779	6.33117	1.7126	1.05221	1.62763	0.103604	0.925385	6.99766	24.4781	7.11676	3.40417	5.97528	5.41578	5.05892	0	0	4.86508	0	lncRNA
1595	ENSECAG00000050208	146.141	-0.670489	0.411401	-1.62977	0.10315	0.925385	26.8244	101.409	104.379	162.265	168.503	296.514	111.296	259	152.161	79.0576	0	lncRNA
1596	ENSECAG00000050425	2.99081	2.41988	1.49017	1.62389	0.104398	0.925385	2.33255	3.49687	4.74451	7.94306	5.97528	5.41578	0	0	0	0	0	lncRNA
1597	ENSECAG00000052827	2.12569	3.35551	2.06183	1.62744	0.103644	0.925385	0	0	0	9.07778	9.56045	1.35395	1.26473	0	0	0	0	lncRNA
1598	ENSECAG00000053228	136.88	0.340506	0.210047	1.6211	0.104997	0.925385	153.949	129.384	180.291	156.592	144.602	96.1302	150.503	99.8715	124.293	133.182	0	lncRNA
1599	ENSECAG00000056301	2.91035	-2.9041	1.78903	-1.62328	0.104529	0.925385	0	0	1.18613	2.26945	0	1.35395	0	6.6581	0	17.6359	0	lncRNA
1600	ENSECAG00000006633	14.1452	1.01465	0.626836	1.61869	0.105514	0.926213	13.9953	4.66249	16.6058	23.8292	34.6566	16.2474	11.3826	5.32648	5.0163	9.73017	VWA7	protein_coding
1601	ENSECAG00000007827	146.591	0.353997	0.218843	1.61758	0.105752	0.926213	164.445	116.562	183.85	148.649	209.135	132.687	126.473	105.864	156.62	121.627	PPP6R2	protein_coding
1602	ENSECAG00000008655	49.8639	-0.735869	0.454776	-1.61809	0.105643	0.926213	15.1616	29.1406	36.7699	47.6584	57.3627	66.3434	115.09	68.5784	21.1799	41.3532	DLGAP5	protein_coding
1603	ENSECAG00000011422	41.3205	-0.560396	0.346503	-1.61729	0.105815	0.926213	34.9883	25.6437	36.7699	30.6375	38.2418	37.9105	80.9427	39.9486	40.6878	47.4346	DHRS7	protein_coding
1604	ENSECAG00000014874	560.29	0.378048	0.23402	1.61545	0.106213	0.926213	562.145	902.191	634.578	534.454	536.58	323.593	394.596	390.165	753.56	571.039	SLC23A2	protein_coding
1605	ENSECAG00000015139	57.4731	0.601334	0.372184	1.61569	0.106161	0.926213	101.466	62.9436	43.8867	66.9486	72.8984	32.4947	27.8241	29.2956	58.5235	78.4495	FARSA	protein_coding
1606	ENSECAG00000015269	18.6752	0.788559	0.487817	1.61651	0.105985	0.926213	17.4941	20.9812	26.0948	21.5597	31.0715	14.8934	24.0299	6.6581	10.59	13.379	TGFBR2	protein_coding
1607	ENSECAG00000016870	117.114	-0.541946	0.335374	-1.61595	0.106106	0.926213	67.644	124.722	104.379	81.7	96.7995	148.934	241.563	74.5707	69.6709	161.156	MEIS2	protein_coding
1608	ENSECAG00000017006	196.495	0.296358	0.183187	1.61779	0.105708	0.926213	185.438	235.456	194.525	255.313	213.915	181.429	136.591	187.093	193.964	181.224	CHMP4A	protein_coding
1609	ENSECAG00000019247	96.0077	0.358766	0.221912	1.6167	0.105942	0.926213	118.96	108.403	106.751	121.415	82.4589	97.4841	88.5311	79.8972	81.3756	74.8007	TTC13	protein_coding
1610	ENSECAG00000019260	108.594	0.489879	0.302413	1.6199	0.105254	0.926213	144.618	139.875	69.9815	119.146	161.333	112.378	45.5303	98.5399	74.1298	120.411	FTSJ1	protein_coding
1611	ENSECAG00000027701	7926.89	-0.322337	0.199077	-1.61916	0.105413	0.926213	5858.21	10526.7	6974.43	5069.94	6793.89	8019.42	12541.1	8048.98	7992.08	7444.19	0	Mt_tRNA
1612	ENSECAG00000030463	771.321	0.336429	0.208239	1.61559	0.106182	0.926213	1193.1	715.692	985.672	841.964	570.042	637.709	516.01	631.188	701.725	920.109	0	protein_coding
1613	ENSECAG00000047556	2.89609	-2.84106	1.75771	-1.61634	0.106021	0.926213	0	0	2.37225	1.13472	0	5.41578	11.3826	8.65553	0	0	0	lncRNA
1614	ENSECAG00000051984	2.41821	-3.18708	1.97238	-1.61586	0.106125	0.926213	0	2.33124	0	0	0	2.70789	7.58838	0	0	11.5546	0	protein_coding
1615	ENSECAG00000055001	9.32085	2.09102	1.29462	1.61517	0.106274	0.926213	4.66511	0	33.2116	28.3681	8.36539	13.5395	5.05892	0	0	0	0	lncRNA
1616	ENSECAG00000055727	3.26896	-2.54763	1.57458	-1.61797	0.105668	0.926213	1.16628	0	2.37225	0	1.19506	9.47762	10.1178	0	8.3605	0	0	lncRNA
1617	ENSECAG00000010645	84.5824	0.464963	0.288062	1.61411	0.106504	0.927646	92.1359	93.2498	111.496	110.068	84.849	81.2368	31.6183	87.2211	65.7693	88.1796	NUDT18	protein_coding
1618	ENSECAG00000010807	10.7336	1.18449	0.734278	1.61314	0.106715	0.928093	17.4941	30.3062	1.18613	9.07778	16.7308	4.06184	6.32365	10.653	7.24577	4.25695	PXYLP1	protein_coding
1619	ENSECAG00000013572	32.5182	0.62756	0.389036	1.61312	0.106719	0.928093	31.4895	38.4655	61.6786	43.1195	22.7061	23.0171	26.5593	29.2956	17.8357	31.0149	PRSS8	protein_coding
1620	ENSECAG00000021615	517.113	0.326172	0.202257	1.61266	0.106819	0.928093	742.918	402.14	538.502	666.082	529.41	441.386	335.153	395.491	562.383	557.66	PSMB2	protein_coding
1621	ENSECAG00000050577	6.86953	1.99815	1.239	1.61271	0.106808	0.928093	2.33255	2.33124	20.1642	13.6167	15.5357	12.1855	2.52946	0	0	0	0	lncRNA
1622	ENSECAG00000002018	326.412	-0.280238	0.174115	-1.6095	0.107507	0.928442	304.398	285.577	294.159	338.147	252.157	347.964	340.212	446.093	382.354	273.053	MACO1	protein_coding
1623	ENSECAG00000006191	8.72616	-1.84407	1.15221	-1.60046	0.109496	0.928442	1.16628	1.16562	14.2335	1.13472	1.19506	41.9723	1.26473	13.982	11.1473	0	RILPL1	protein_coding
1624	ENSECAG00000006211	31.1754	-0.685113	0.426813	-1.60518	0.108453	0.928442	19.8267	18.65	36.7699	13.6167	29.8764	47.3881	58.1776	22.6375	36.2288	28.5824	TRIM21	protein_coding
1625	ENSECAG00000009146	572.071	0.29909	0.18612	1.60697	0.108061	0.928442	754.581	531.524	647.625	633.175	592.748	438.679	351.595	687.782	528.384	554.62	MRPS16	protein_coding
1626	ENSECAG00000010204	21.1507	-1.0776	0.67266	-1.60199	0.109157	0.928442	1.16628	2.33124	18.978	26.0986	19.1209	23.0171	56.9129	12.6504	25.0815	26.1498	0	protein_coding
1627	ENSECAG00000010387	47.0153	0.503924	0.314588	1.60186	0.109187	0.928442	47.8173	53.6186	54.5618	66.9486	52.5825	33.8487	48.0597	35.2879	51.2778	26.1498	FAN1	protein_coding
1628	ENSECAG00000010404	141.744	-0.370151	0.229948	-1.60972	0.10746	0.928442	81.6394	149.2	130.474	124.82	130.261	171.951	212.475	146.478	132.096	138.047	HELZ	protein_coding
1629	ENSECAG00000010715	157.569	-0.401706	0.250959	-1.60068	0.109447	0.928442	132.956	89.7529	154.197	167.939	136.236	140.81	121.414	169.782	242.455	220.145	PLEKHA3	protein_coding
1630	ENSECAG00000010876	67.2812	0.489362	0.30476	1.60573	0.108334	0.928442	55.9813	116.562	66.4231	52.1973	102.775	46.0342	50.5892	59.9229	59.0809	63.2461	RTKN	protein_coding
1631	ENSECAG00000011658	98.8533	0.437191	0.272824	1.60247	0.109053	0.928442	149.283	90.9185	124.543	100.99	105.165	64.9894	54.3834	123.841	88.064	86.3552	FAM135A	protein_coding
1632	ENSECAG00000011753	166.043	-0.347891	0.216783	-1.60479	0.10854	0.928442	194.768	129.384	111.496	145.245	148.187	181.429	241.563	181.766	146.587	180.008	SESTD1	protein_coding
1633	ENSECAG00000012851	690.301	-0.2559	0.159643	-1.60295	0.108946	0.928442	632.122	662.073	591.877	667.217	595.138	718.945	585.57	1013.36	737.954	698.748	ZFR	protein_coding
1634	ENSECAG00000014730	4.86281	-2.04502	1.2702	-1.61	0.107398	0.928442	1.16628	0	4.74451	3.40417	0	18.9552	11.3826	5.32648	0	3.64881	PELI3	protein_coding
1635	ENSECAG00000015151	80.5539	-0.575302	0.359278	-1.60127	0.109317	0.928442	74.6417	19.8156	80.6566	76.0264	71.7034	98.8381	127.738	96.5425	50.7204	108.856	CARD19	protein_coding
1636	ENSECAG00000015850	93.7953	-0.412793	0.257486	-1.60316	0.108898	0.928442	110.796	87.4217	87.7734	65.8139	51.3874	96.1302	92.3253	124.506	115.375	106.424	TIMM23	protein_coding
1637	ENSECAG00000016649	15.607	0.822217	0.51121	1.60837	0.107753	0.928442	15.1616	12.8218	23.7225	30.6375	17.9258	10.8316	6.32365	12.6504	15.0489	10.9464	NKAIN1	protein_coding
1638	ENSECAG00000017190	25.8185	-0.816396	0.509801	-1.6014	0.109288	0.928442	8.16394	11.6562	26.0948	10.2125	37.0467	39.2644	43.0008	37.9512	28.9831	15.8115	0	protein_coding
1639	ENSECAG00000018370	31.6505	-0.717618	0.447094	-1.60507	0.108478	0.928442	34.9883	26.8093	17.7919	17.0208	22.7061	32.4947	56.9129	61.9203	17.2784	28.5824	NCAPD3	protein_coding
1640	ENSECAG00000018547	135.919	0.364793	0.227004	1.60699	0.108056	0.928442	100.3	129.384	201.642	179.286	154.162	131.333	110.032	120.512	110.916	121.627	BROX	protein_coding
1641	ENSECAG00000019648	10.6379	1.36546	0.851402	1.60378	0.108763	0.928442	18.6604	10.4906	26.0948	5.67361	16.7308	1.35395	0	5.99229	18.9505	2.43254	MID1	protein_coding
1642	ENSECAG00000019674	147.931	0.406883	0.253879	1.60267	0.109008	0.928442	183.105	164.353	196.897	159.996	141.017	121.855	78.4133	105.198	125.965	202.509	ZGPAT	protein_coding
1643	ENSECAG00000019700	36.4746	-0.933553	0.58122	-1.6062	0.108231	0.928442	19.8267	30.3062	24.9087	10.2125	39.4369	41.9723	112.561	46.6067	33.442	5.47322	TGFBR3	protein_coding
1644	ENSECAG00000021253	25.8598	0.921979	0.574617	1.60451	0.108602	0.928442	59.4801	17.4843	48.6312	23.8292	20.316	2.70789	25.2946	23.3034	8.3605	29.1905	PDCL	protein_coding
1645	ENSECAG00000021954	154.637	0.377681	0.23545	1.60408	0.108696	0.928442	226.258	123.556	181.477	187.229	157.747	105.608	104.973	139.82	135.44	184.265	NAE1	protein_coding
1646	ENSECAG00000022278	31.8875	-0.704136	0.438195	-1.6069	0.108076	0.928442	15.1616	17.4843	21.3503	37.4459	28.6813	52.8039	63.2365	34.6221	26.1962	21.8929	KNL1	protein_coding
1647	ENSECAG00000023010	23.2098	1.08544	0.674198	1.60997	0.107403	0.928442	53.6487	22.1468	21.3503	41.9847	19.1209	10.8316	7.58838	22.6375	0.557367	32.2312	USP45	protein_coding
1648	ENSECAG00000023653	2.50819	2.59776	1.61927	1.60428	0.108653	0.928442	0	3.49687	16.6058	0	1.19506	1.35395	1.26473	0	0.557367	0.608135	0	protein_coding
1649	ENSECAG00000023940	95.9674	0.382018	0.238281	1.60322	0.108886	0.928442	134.122	83.9248	117.427	108.933	99.1897	90.7144	68.2954	71.9075	103.67	81.4901	NDOR1	protein_coding
1650	ENSECAG00000024063	14.145	-0.887514	0.553548	-1.60332	0.108864	0.928442	6.99766	13.9875	9.48902	11.3472	7.17034	23.0171	30.3535	11.3188	15.6063	12.1627	KDM4C	protein_coding
1651	ENSECAG00000024077	36.1689	0.539793	0.336019	1.60643	0.108179	0.928442	37.3209	51.2874	37.9561	46.5236	41.827	25.725	25.2946	41.2802	29.5404	24.9336	JCAD	protein_coding
1652	ENSECAG00000024080	79.0895	0.437259	0.271562	1.61016	0.107363	0.928442	123.625	81.5935	80.6566	90.7778	80.0688	62.2815	41.7361	75.9023	69.1135	85.139	ALG9	protein_coding
1653	ENSECAG00000024887	12.8229	-1.3286	0.826978	-1.60657	0.108148	0.928442	2.33255	6.99373	9.48902	10.2125	7.17034	25.725	34.1477	12.6504	19.5078	0	PC	protein_coding
1654	ENSECAG00000028045	184.186	-0.531148	0.331247	-1.60348	0.108828	0.928442	103.799	150.365	275.181	137.301	84.849	296.514	326.3	117.848	159.964	189.738	ZNF280B	protein_coding
1655	ENSECAG00000029412	3.37984	1.92812	1.20281	1.60301	0.108933	0.928442	4.66511	1.16562	14.2335	3.40417	3.58517	0	1.26473	0.66581	0.557367	4.25695	0	protein_coding
1656	ENSECAG00000031446	377.135	0.394023	0.24612	1.60093	0.109391	0.928442	242.586	409.133	607.297	293.893	587.968	387.229	321.241	248.347	335.535	338.123	KCNIP3	protein_coding
1657	ENSECAG00000043835	152.616	0.366562	0.228732	1.60258	0.109027	0.928442	176.108	158.525	143.521	173.613	210.33	97.4841	111.296	180.435	160.522	114.329	CNDP2	protein_coding
1658	ENSECAG00000046069	9.84238	-1.41725	0.883268	-1.60455	0.108592	0.928442	0	8.15935	5.93064	12.482	0	13.5395	27.8241	12.6504	4.45894	13.379	0	lncRNA
1659	ENSECAG00000046422	2.34413	3.50162	2.17747	1.60812	0.107809	0.928442	0	0	7.11676	13.6167	0	2.70789	0	0	0	0	0	lncRNA
1660	ENSECAG00000047942	4.57877	-2.42901	1.51129	-1.60724	0.108001	0.928442	1.16628	1.16562	1.18613	1.13472	2.39011	12.1855	26.5593	0	0	0	0	protein_coding
1661	ENSECAG00000058180	5.59572	-1.91415	1.19396	-1.60319	0.108893	0.928442	3.49883	0	5.93064	1.13472	1.19506	14.8934	1.26473	11.3188	16.721	0	0	lncRNA
1662	ENSECAG00000022243	39.773	-0.607221	0.379558	-1.59981	0.109641	0.929109	20.993	19.8156	34.3977	38.5806	44.2171	56.8657	25.2946	59.2571	42.3599	55.9485	MOSPD1	protein_coding
1663	ENSECAG00000055447	62.8327	-0.643904	0.402912	-1.59813	0.110015	0.931719	51.3162	57.1155	62.8647	30.6375	41.827	115.085	113.826	65.2494	22.2947	68.1112	SHLD1	protein_coding
1664	ENSECAG00000000004	89.871	0.417883	0.261677	1.59695	0.110278	0.931843	85.1382	129.384	123.357	72.6223	103.97	75.821	72.0896	60.5887	73.5724	102.167	RNF170	protein_coding
1665	ENSECAG00000020761	137.09	0.473782	0.296584	1.59747	0.110162	0.931843	197.101	116.562	156.569	172.478	156.552	58.2197	113.826	75.2365	184.488	139.871	QSOX2	protein_coding
1666	ENSECAG00000037106	114.721	-0.369565	0.231325	-1.5976	0.110132	0.931843	82.8056	121.225	124.543	87.3737	83.6539	121.855	165.68	113.188	113.703	133.182	0	protein_coding
1667	ENSECAG00000048166	110.867	0.383154	0.23994	1.59687	0.110294	0.931843	125.958	137.543	132.846	124.82	106.36	129.979	59.4423	85.2237	103.113	103.383	SRA1	protein_coding
1668	ENSECAG00000005814	211.63	-0.330721	0.207228	-1.59593	0.110505	0.932458	220.426	184.168	220.62	123.685	187.624	211.216	303.535	232.368	203.996	228.659	NEDD9	protein_coding
1669	ENSECAG00000007595	47.5157	-0.730977	0.458319	-1.59491	0.110733	0.932458	12.829	39.6312	48.6312	37.4459	39.4369	73.1131	80.9427	59.2571	13.9342	69.9356	THSD7B	protein_coding
1670	ENSECAG00000008876	134.196	0.463546	0.291089	1.59245	0.111283	0.932458	165.611	235.456	141.149	162.265	72.8984	101.546	137.856	90.5502	88.064	146.561	PTPRE	protein_coding
1671	ENSECAG00000009616	51.3573	-0.670026	0.420336	-1.59402	0.110931	0.932458	48.9836	31.4718	47.4451	28.3681	40.6319	85.2986	106.237	35.2879	21.7373	68.1112	LMO7	protein_coding
1672	ENSECAG00000021027	340.9	-0.244017	0.153115	-1.59369	0.111006	0.932458	328.89	343.859	300.09	276.872	309.52	441.386	345.271	342.226	391.272	329.609	PAPOLA	protein_coding
1673	ENSECAG00000022500	561.869	0.293249	0.184155	1.5924	0.111294	0.932458	878.206	660.908	489.87	569.631	494.753	515.853	509.686	514.671	414.681	570.431	ANXA6	protein_coding
1674	ENSECAG00000022617	75.7401	-0.422694	0.265409	-1.59262	0.111246	0.932458	80.4731	54.7842	84.215	55.6014	48.9973	75.821	86.0016	95.2108	74.1298	102.167	PRKAA1	protein_coding
1675	ENSECAG00000024929	111.385	0.477364	0.299502	1.59386	0.110967	0.932458	181.939	93.2498	115.054	156.592	103.97	46.0342	77.1485	104.532	133.768	101.559	POLR3K	protein_coding
1676	ENSECAG00000025149	47.6664	-0.487713	0.30591	-1.5943	0.110868	0.932458	44.3185	45.4593	28.467	32.907	47.8022	43.3263	59.4423	49.2699	62.4251	63.2461	ELF4	protein_coding
1677	ENSECAG00000039010	9.77148	2.01769	1.26624	1.59345	0.111059	0.932458	5.83138	4.66249	32.0254	18.1556	16.7308	20.3092	0	0	0	0	BHLHE22	protein_coding
1678	ENSECAG00000050033	308.033	0.320775	0.200967	1.59615	0.110454	0.932458	363.878	313.552	330.929	406.231	298.764	196.322	271.917	214.391	365.075	319.271	PSMG3	protein_coding
1679	ENSECAG00000052643	5.30729	-1.99325	1.24966	-1.59503	0.110705	0.932458	2.33255	1.16562	4.74451	1.13472	1.19506	13.5395	13.912	0	15.0489	0	0	lncRNA
1680	ENSECAG00000059406	40.4504	0.686937	0.431368	1.59246	0.111281	0.932458	45.4848	22.1468	45.0728	39.7153	96.7995	35.2026	31.6183	27.2982	16.1636	45.002	0	protein_coding
1681	ENSECAG00000059490	3.95936	2.45693	1.54029	1.59511	0.110688	0.932458	5.83138	0	9.48902	7.94306	9.56045	6.76973	0	0	0	0	0	lncRNA
1682	ENSECAG00000007145	26.7655	0.674951	0.424215	1.59106	0.111597	0.933084	45.4848	37.2999	28.467	36.3111	17.9258	14.8934	15.1768	22.6375	17.8357	31.623	FAM20C	protein_coding
1683	ENSECAG00000020753	137.497	-1.103	0.693706	-1.59001	0.111832	0.933084	37.3209	61.778	115.054	71.4875	150.577	288.391	383.213	31.9589	48.4909	186.698	NRP1	protein_coding
1684	ENSECAG00000020988	58.1788	0.553693	0.347878	1.59163	0.111468	0.933084	90.9696	74.5998	56.9341	61.275	63.338	52.8039	20.2357	45.9409	38.4583	77.2332	NMNAT1	protein_coding
1685	ENSECAG00000021538	260.833	-0.363284	0.228397	-1.59058	0.111705	0.933084	277.574	216.806	154.197	222.406	267.693	341.194	365.507	340.895	213.472	208.59	CKAP2L	protein_coding
1686	ENSECAG00000023524	654.22	-0.27991	0.176032	-1.5901	0.111811	0.933084	657.78	508.211	517.151	746.648	525.825	766.333	545.099	898.844	639.857	736.452	DKC1	protein_coding
1687	ENSECAG00000043494	4.27637	-1.82326	1.14567	-1.59144	0.111511	0.933084	3.49883	4.66249	0	0	1.19506	14.8934	1.26473	6.6581	3.90157	6.68949	0	protein_coding
1688	ENSECAG00000048959	3.38497	2.59167	1.62944	1.59053	0.111715	0.933084	5.83138	2.33124	5.93064	0	14.3407	5.41578	0	0	0	0	0	protein_coding
1689	ENSECAG00000010051	242.422	-0.483911	0.304536	-1.58901	0.112057	0.933162	101.466	194.659	262.134	177.017	273.668	418.369	330.095	334.902	181.702	150.209	CHD3	protein_coding
1690	ENSECAG00000014096	121.113	-0.445942	0.280679	-1.5888	0.112107	0.933162	75.808	85.0904	115.054	93.0473	142.212	161.12	183.386	161.126	76.9166	117.37	GBE1	protein_coding
1691	ENSECAG00000014119	5.31434	-1.60616	1.01076	-1.58906	0.112047	0.933162	1.16628	1.16562	3.55838	0	7.17034	5.41578	17.7062	3.32905	3.90157	9.73017	ACAP1	protein_coding
1692	ENSECAG00000017358	2.16631	-4.31246	2.71417	-1.58887	0.11209	0.933162	0	0	0	0	0	21.6631	0	0	0	0	COLGALT2	protein_coding
1693	ENSECAG00000008179	20.8699	1.14056	0.718665	1.58705	0.112501	0.93511	60.6464	37.2999	18.978	19.2903	7.17034	17.6013	8.85311	27.964	0.557367	10.3383	IL20RB	protein_coding
1694	ENSECAG00000008340	8.88815	1.73169	1.09166	1.58629	0.112673	0.93511	0	13.9875	24.9087	18.1556	11.9506	0	0	1.33162	3.3442	15.2034	AIG1	protein_coding
1695	ENSECAG00000019370	23.128	0.692668	0.436644	1.58635	0.112661	0.93511	15.1616	22.1468	26.0948	37.4459	41.827	23.0171	13.912	17.9769	17.2784	16.4197	CAMTA2	protein_coding
1696	ENSECAG00000021518	354.098	-0.374829	0.236175	-1.58708	0.112494	0.93511	344.052	203.984	332.116	360.842	298.764	537.517	436.332	362.201	448.68	216.496	SLX1A	protein_coding
1697	ENSECAG00000038698	134.173	0.962301	0.606543	1.58654	0.112618	0.93511	33.822	106.072	385.491	211.058	149.382	119.147	132.797	99.8715	32.3273	71.76	ALOX15	protein_coding
1698	ENSECAG00000011391	229.657	0.462097	0.29145	1.58551	0.112851	0.936039	186.604	445.268	255.017	297.297	148.187	139.456	159.356	175.108	185.603	304.676	TET3	protein_coding
1699	ENSECAG00000023501	635.454	-0.276893	0.174764	-1.58439	0.113106	0.937602	518.993	512.874	553.921	626.367	657.281	915.268	770.221	702.43	572.973	524.213	WNK1	protein_coding
1700	ENSECAG00000018233	864.755	-0.208585	0.131692	-1.58389	0.11322	0.937992	692.768	882.376	748.446	829.482	855.66	1053.37	976.372	888.856	903.492	816.726	NIPBL	protein_coding
1701	ENSECAG00000001626	40.0994	0.512368	0.323725	1.58273	0.113484	0.938943	55.9813	53.6186	37.9561	51.0625	38.2418	23.0171	30.3535	37.2854	34.5567	38.9207	SHLD2	protein_coding
1702	ENSECAG00000010401	77.054	0.435953	0.275417	1.58288	0.113449	0.938943	88.637	86.256	109.124	64.6792	95.6045	56.8657	58.1776	46.6067	75.8019	88.7878	NSF	protein_coding
1703	ENSECAG00000059063	4.78102	-2.00179	1.26495	-1.5825	0.113534	0.938943	0	0	8.30289	0	1.19506	4.06184	20.2357	2.66324	2.22947	9.12203	0	lncRNA
1704	ENSECAG00000007968	1382.86	0.226855	0.143524	1.5806	0.113968	0.941426	1811.23	1743.77	1329.65	1191.46	1381.48	1222.61	1276.11	1251.06	1373.35	1247.89	COX5B	protein_coding
1705	ENSECAG00000020051	10.53	-1.21764	0.770258	-1.58083	0.113918	0.941426	6.99766	6.99373	11.8613	5.67361	0	17.6013	16.4415	19.3085	2.78683	17.6359	CD82	protein_coding
1706	ENSECAG00000013595	188.245	0.297406	0.188199	1.58027	0.114045	0.941503	234.422	217.971	162.499	217.867	206.745	152.996	149.238	188.424	151.604	200.685	FHOD1	protein_coding
1707	ENSECAG00000049942	3.34396	-2.22318	1.40756	-1.57946	0.114231	0.942488	0	3.49687	0	0	2.39011	12.1855	0	5.99229	3.90157	5.47322	0	lncRNA
1708	ENSECAG00000007120	37.3202	-1.06653	0.675465	-1.57896	0.114346	0.942526	6.99766	11.6562	39.1422	22.6945	39.4369	74.467	112.561	29.9615	2.22947	34.0556	NRN1	protein_coding
1709	ENSECAG00000017604	50.7692	-0.57049	0.361332	-1.57886	0.114369	0.942526	69.9766	38.4655	43.8867	31.7722	20.316	54.1578	64.5012	43.9435	57.9662	82.7064	SOS1	protein_coding
1710	ENSECAG00000000012	509.208	0.301194	0.191448	1.57324	0.115664	0.942544	463.012	798.451	518.338	563.957	467.267	446.802	471.744	358.872	578.547	425.087	PRKX	protein_coding
1711	ENSECAG00000000260	139.235	-0.372039	0.236279	-1.57457	0.115355	0.942544	88.637	146.868	122.171	123.685	124.286	161.12	203.622	100.537	156.62	164.805	STAU2	protein_coding
1712	ENSECAG00000000496	180.797	0.270868	0.172023	1.5746	0.115348	0.942544	164.445	223.799	202.828	195.172	201.964	169.243	163.15	165.787	148.26	173.319	PRR14	protein_coding
1713	ENSECAG00000001466	12.306	-1.66317	1.05456	-1.57713	0.114767	0.942544	0	11.6562	0	4.53889	13.1456	29.7868	35.4124	13.3162	0	15.2034	PLEKHB1	protein_coding
1714	ENSECAG00000008007	209.972	0.295792	0.187571	1.57696	0.114805	0.942544	284.571	181.837	207.572	233.753	250.962	184.137	158.091	184.429	191.177	223.186	TBCB	protein_coding
1715	ENSECAG00000009610	7.56242	-1.28566	0.817621	-1.57244	0.115848	0.942544	4.66511	0	7.11676	5.67361	4.78022	8.12368	3.79419	11.3188	9.47524	20.6766	RNF144A	protein_coding
1716	ENSECAG00000011828	211.071	-0.355502	0.226094	-1.57237	0.115866	0.942544	141.119	173.678	151.824	276.872	184.039	219.339	172.003	259	285.929	246.903	MORC4	protein_coding
1717	ENSECAG00000016019	20.3977	-0.835956	0.531721	-1.57217	0.115911	0.942544	22.1593	3.49687	8.30289	20.425	19.1209	21.6631	20.2357	37.9512	31.7699	18.8522	ST6GALNAC2	protein_coding
1718	ENSECAG00000016134	202.33	0.37793	0.239924	1.57521	0.115208	0.942544	135.288	241.284	268.065	291.624	209.135	157.058	123.944	221.049	166.653	209.199	RAB11FIP1	protein_coding
1719	ENSECAG00000016648	4.02159	1.76246	1.11721	1.57755	0.114669	0.942544	5.83138	3.49687	4.74451	11.3472	5.97528	0	1.26473	5.32648	2.22947	0	IL5	protein_coding
1720	ENSECAG00000017788	39.8136	0.605855	0.384172	1.57704	0.114786	0.942544	64.1452	24.4781	58.1202	54.4667	39.4369	25.725	30.3535	39.2828	18.9505	43.1776	TRMT11	protein_coding
1721	ENSECAG00000018900	86.5948	0.439522	0.27925	1.57393	0.115503	0.942544	94.4684	113.065	99.6347	85.1042	108.75	54.1578	48.0597	87.8869	110.359	64.4624	GABPA	protein_coding
1722	ENSECAG00000019897	102.417	0.449858	0.285858	1.57371	0.115554	0.942544	130.623	116.562	117.427	131.628	97.9946	58.2197	54.3834	77.8998	142.129	97.3017	DDX56	protein_coding
1723	ENSECAG00000032734	78.9276	0.474901	0.301295	1.5762	0.114979	0.942544	139.953	75.7654	91.3318	87.3737	64.533	50.096	86.0016	46.6067	61.8677	85.7471	GTPBP6	protein_coding
1724	ENSECAG00000037989	95.8645	-0.437855	0.278161	-1.57411	0.115462	0.942544	89.8033	76.9311	87.7734	71.4875	81.2638	93.4223	118.885	174.442	95.3097	69.3274	0	protein_coding
1725	ENSECAG00000045315	5.68218	2.24365	1.42314	1.57655	0.114899	0.942544	0	6.99373	1.18613	27.2333	10.7555	8.12368	2.52946	0	0	0	0	lncRNA
1726	ENSECAG00000046228	30.3671	2.67057	1.69292	1.57749	0.114682	0.942544	9.33021	18.65	87.7734	61.275	84.849	39.2644	2.52946	0	0	0	0	lncRNA
1727	ENSECAG00000050601	6.63623	1.50689	0.957654	1.57353	0.115597	0.942544	9.33021	26.8093	5.93064	6.80834	0	1.35395	7.58838	2.66324	2.22947	3.64881	MFSD12	protein_coding
1728	ENSECAG00000052251	2.6252	2.6932	1.71107	1.57399	0.115491	0.942544	4.66511	9.32498	5.93064	2.26945	0	4.06184	0	0	0	0	0	lncRNA
1729	ENSECAG00000054107	7.2803	-1.76481	1.11866	-1.57761	0.114655	0.942544	9.33021	1.16562	4.74451	1.13472	0	17.6013	21.5004	13.982	3.3442	0	0	lncRNA
1730	ENSECAG00000057507	4.04302	-2.0034	1.27203	-1.57496	0.115265	0.942544	1.16628	5.82811	0	1.13472	0	2.70789	5.05892	0.66581	5.0163	18.8522	MYO5C	protein_coding
1731	ENSECAG00000058630	3.97012	2.45666	1.56024	1.57454	0.115362	0.942544	6.99766	0	15.4197	4.53889	5.97528	6.76973	0	0	0	0	0	lncRNA
1732	ENSECAG00000059220	514.578	-0.27618	0.175581	-1.57295	0.11573	0.942544	474.675	489.561	569.341	440.272	354.932	591.674	446.45	544.633	717.331	516.915	0	lncRNA
1733	ENSECAG00000007916	166.268	0.334455	0.213046	1.56988	0.116444	0.942674	176.108	172.512	222.992	140.706	213.915	169.243	146.709	133.828	110.916	175.751	TBC1D13	protein_coding
1734	ENSECAG00000008285	103.977	-0.422257	0.269043	-1.56948	0.116537	0.942674	53.6487	97.9123	118.613	70.3528	103.97	142.164	92.3253	103.866	110.359	146.561	PSEN2	protein_coding
1735	ENSECAG00000008627	51.2897	0.705354	0.449301	1.56989	0.11644	0.942674	107.297	29.1406	81.8428	70.3528	29.8764	48.7421	16.4415	22.6375	58.5235	48.0427	KLHL5	protein_coding
1736	ENSECAG00000009163	53.7946	-0.595608	0.379383	-1.56994	0.116429	0.942674	19.8267	29.1406	61.6786	46.5236	56.1676	75.821	93.59	46.6067	69.6709	38.9207	NUF2	protein_coding
1737	ENSECAG00000014314	39.7155	-0.722825	0.460291	-1.57036	0.11633	0.942674	22.1593	30.3062	22.5364	46.5236	27.4863	43.3263	91.0606	56.5939	13.3768	43.7858	POLQ	protein_coding
1738	ENSECAG00000018755	261.227	0.318926	0.203204	1.56948	0.116535	0.942674	261.246	290.24	291.787	280.277	329.835	203.092	160.621	205.069	271.438	318.663	SFXN1	protein_coding
1739	ENSECAG00000018894	456.29	0.30234	0.192362	1.57173	0.116014	0.942674	581.972	579.314	384.305	464.102	512.679	352.026	351.595	318.923	541.203	476.778	RPL22L1	protein_coding
1740	ENSECAG00000019597	507.291	0.388725	0.247718	1.56922	0.116596	0.942674	863.045	532.689	460.217	526.511	497.143	304.638	309.859	356.208	685.004	537.592	0	protein_coding
1741	ENSECAG00000047293	2.24681	3.44278	2.19326	1.56971	0.116482	0.942674	0	12.8218	7.11676	0	0	0	2.52946	0	0	0	0	lncRNA
1742	ENSECAG00000049152	25.9746	-1.05565	0.6719	-1.57114	0.116151	0.942674	11.6628	9.32498	15.4197	1.13472	46.6072	52.8039	44.2656	22.6375	47.3762	8.5139	0	lncRNA
1743	ENSECAG00000007880	61.0319	-0.5885	0.375117	-1.56884	0.116684	0.942804	48.9836	87.4217	33.2116	43.1195	29.8764	83.9447	115.09	45.9409	74.6872	48.0427	ABCA5	protein_coding
1744	ENSECAG00000020462	992.006	-0.423594	0.270099	-1.56829	0.116813	0.942804	683.438	1226.23	706.932	787.498	829.369	1627.44	1851.56	715.746	753.56	738.276	0	protein_coding
1745	ENSECAG00000038168	51.1432	-0.582116	0.371123	-1.56852	0.116759	0.942804	51.3162	33.803	32.0254	70.3528	16.7308	81.2368	55.6481	57.9255	61.3104	51.0834	FAM220A	protein_coding
1746	ENSECAG00000053040	4.22391	2.28542	1.45819	1.5673	0.117045	0.944136	6.99766	1.16562	9.48902	0	16.7308	4.06184	3.79419	0	0	0	0	lncRNA
1747	ENSECAG00000010652	71.1947	0.520926	0.332648	1.566	0.117349	0.945062	101.466	72.2686	49.8173	48.7931	146.992	67.6973	54.3834	58.5913	59.6383	52.2996	FKRP	protein_coding
1748	ENSECAG00000012688	25.3335	0.811018	0.517909	1.56595	0.117361	0.945062	38.4871	62.9436	18.978	31.7722	9.56045	14.8934	15.1768	29.2956	20.0652	12.1627	TAF12	protein_coding
1749	ENSECAG00000057614	112.241	0.466676	0.297915	1.56648	0.117237	0.945062	124.792	107.237	126.916	127.089	168.503	50.096	53.1187	125.838	122.063	116.762	0	protein_coding
1750	ENSECAG00000011151	364.045	-0.35908	0.229461	-1.56488	0.11761	0.946527	279.906	208.646	346.349	486.796	274.863	300.576	355.389	523.327	415.796	448.804	USP1	protein_coding
1751	ENSECAG00000008351	183.866	-0.530406	0.339064	-1.56432	0.117741	0.947041	79.3068	120.059	196.897	199.711	154.162	330.363	326.3	87.8869	182.816	161.156	MMP14	protein_coding
1752	ENSECAG00000000136	20.0461	-0.855418	0.547136	-1.56345	0.117947	0.94794	6.99766	10.4906	13.0474	27.2333	13.1456	35.2026	27.8241	31.9589	7.80314	26.758	FERMT1	protein_coding
1753	ENSECAG00000054297	6.92115	1.92397	1.23073	1.56328	0.117988	0.94794	9.33021	4.66249	26.0948	9.07778	4.78022	1.35395	13.912	0	0	0	0	lncRNA
1754	ENSECAG00000017830	156.477	0.362781	0.232127	1.56286	0.118086	0.948187	222.759	160.856	130.474	155.457	209.135	167.889	135.326	165.787	100.326	116.762	TBC1D9B	protein_coding
1755	ENSECAG00000016126	21.2254	-1.03256	0.660961	-1.56221	0.118238	0.948869	20.993	1.16562	1.18613	27.2333	19.1209	20.3092	35.4124	21.9717	35.6715	29.1905	RELL1	protein_coding
1756	ENSECAG00000034204	480.764	0.219807	0.140734	1.56186	0.118322	0.948998	525.991	528.027	466.148	478.853	586.773	476.589	426.214	474.057	377.337	467.656	PAFAH1B2	protein_coding
1757	ENSECAG00000013269	1398.15	0.25471	0.163196	1.56076	0.118581	0.949261	2018.82	1693.65	1216.97	1255	1420.92	1425.71	1182.52	1433.49	1164.34	1170.05	RPS27L	protein_coding
1758	ENSECAG00000016521	150.872	-0.659122	0.422335	-1.56066	0.118604	0.949261	38.4871	142.206	79.4705	96.4514	227.061	276.205	295.947	71.2417	99.2113	182.441	PTGIS	protein_coding
1759	ENSECAG00000051622	3.18103	2.16281	1.3859	1.56058	0.118622	0.949261	0	4.66249	5.93064	10.2125	4.78022	0	5.05892	0	0.557367	0.608135	0	protein_coding
1760	ENSECAG00000055026	3.73538	2.73185	1.75054	1.56058	0.118624	0.949261	9.33021	0	13.0474	0	9.56045	5.41578	0	0	0	0	0	lncRNA
1761	ENSECAG00000019471	10.45	-1.95041	1.25015	-1.56014	0.118727	0.94955	1.16628	0	13.0474	1.13472	5.97528	33.8487	36.6772	12.6504	0	0	RASSF6	protein_coding
1762	ENSECAG00000002233	387.446	-0.314149	0.201399	-1.55983	0.118799	0.949584	346.384	336.865	266.879	442.542	333.421	369.627	575.452	340.229	512.778	350.286	SLC44A1	protein_coding
1763	ENSECAG00000053729	12.361	-1.18573	0.760318	-1.55952	0.118874	0.94964	9.33021	0	1.18613	7.94306	19.1209	18.9552	25.2946	16.6453	11.1473	13.9871	0	protein_coding
1764	ENSECAG00000019433	42.602	-0.905409	0.580745	-1.55905	0.118985	0.94999	18.6604	1.16562	16.6058	57.8709	53.7775	35.2026	94.8548	49.2699	39.0157	59.5973	CDKN3	protein_coding
1765	ENSECAG00000003766	35.3786	0.70709	0.453837	1.55803	0.119227	0.950075	52.4824	90.9185	28.467	22.6945	25.0962	16.2474	34.1477	30.6273	31.2125	21.8929	GADD45GIP1	protein_coding
1766	ENSECAG00000006626	109.424	-0.45645	0.293163	-1.55698	0.119474	0.950075	66.4778	87.4217	109.124	96.4514	100.385	111.024	216.269	71.9075	122.063	113.113	ZDHHC17	protein_coding
1767	ENSECAG00000008461	8.03429	-1.15852	0.743675	-1.55783	0.119274	0.950075	5.83138	1.16562	3.55838	5.67361	8.36539	17.6013	12.6473	10.653	10.59	4.25695	DEPDC1	protein_coding
1768	ENSECAG00000010437	64.1973	-0.631701	0.405604	-1.55743	0.119368	0.950075	47.8173	26.8093	92.5179	43.1195	40.6319	89.3604	117.62	100.537	50.7204	32.8393	TCEA3	protein_coding
1769	ENSECAG00000011823	40.0426	-0.577426	0.370755	-1.55743	0.119368	0.950075	38.4871	22.1468	49.8173	31.7722	17.9258	58.2197	50.5892	54.5964	44.032	32.8393	ARHGAP19	protein_coding
1770	ENSECAG00000018981	432.322	-0.377162	0.242279	-1.55673	0.119535	0.950075	686.937	300.73	303.649	307.51	282.033	406.184	540.04	577.923	434.746	483.468	ITPKA	protein_coding
1771	ENSECAG00000018984	220.17	0.282464	0.181285	1.55812	0.119205	0.950075	313.728	209.812	222.992	253.043	210.33	182.783	178.327	215.057	217.373	198.252	CUL4A	protein_coding
1772	ENSECAG00000023331	155.745	-0.544044	0.349425	-1.55697	0.119478	0.950075	53.6487	102.575	99.6347	225.81	150.577	239.648	240.299	223.712	98.0966	123.451	KIF20B	protein_coding
1773	ENSECAG00000048780	4.81258	2.45716	1.57885	1.55629	0.119639	0.950364	0	0	23.7225	6.80834	9.56045	6.76973	1.26473	0	0	0	0	lncRNA
1774	ENSECAG00000007319	122.228	0.384389	0.247082	1.55571	0.119776	0.950413	160.946	153.862	96.0763	159.996	121.896	125.917	67.0307	117.848	122.621	96.0854	MRPS11	protein_coding
1775	ENSECAG00000055466	129.07	0.377292	0.242523	1.5557	0.11978	0.950413	181.939	159.69	105.565	121.415	162.528	92.0683	92.3253	146.478	133.211	95.4773	C11orf98	protein_coding
1776	ENSECAG00000017536	157.809	0.361021	0.232163	1.55503	0.119938	0.950597	193.602	157.359	190.966	155.457	191.209	111.024	145.444	107.861	209.013	116.154	METTL21A	protein_coding
1777	ENSECAG00000051427	105.119	0.365382	0.234937	1.55524	0.11989	0.950597	92.1359	139.875	119.799	141.84	99.1897	73.1131	96.1195	88.5527	114.818	85.7471	RAP2C	protein_coding
1778	ENSECAG00000022176	228.601	-0.312224	0.200824	-1.55471	0.120014	0.950664	145.785	185.334	211.131	229.214	247.377	268.081	269.387	286.298	186.161	257.241	RC3H2	protein_coding
1779	ENSECAG00000008260	222.762	0.352738	0.22696	1.55419	0.12014	0.951122	257.747	254.106	215.875	334.743	188.819	185.491	136.591	181.1	193.406	279.742	UTP18	protein_coding
1780	ENSECAG00000012630	581.605	0.268968	0.173246	1.55252	0.120539	0.95321	623.958	718.023	629.833	651.331	559.286	444.094	417.361	459.409	690.02	622.731	EDF1	protein_coding
1781	ENSECAG00000015063	4.46226	-2.12984	1.3718	-1.55259	0.120522	0.95321	3.49883	0	4.74451	0	0	4.06184	18.971	6.6581	6.6884	0	ADGRG6	protein_coding
1782	ENSECAG00000007773	246.353	0.310706	0.200311	1.55112	0.120874	0.953793	323.059	301.896	245.528	205.385	290.399	199.03	183.386	196.414	297.077	221.361	ZMPSTE24	protein_coding
1783	ENSECAG00000017340	7.94803	-1.91365	1.23386	-1.55094	0.120915	0.953793	2.33255	1.16562	0	0	13.1456	2.70789	32.883	12.6504	0	14.5953	ZSCAN30	protein_coding
1784	ENSECAG00000019234	108.457	0.376031	0.242476	1.55079	0.120951	0.953793	127.124	86.256	135.218	140.706	124.286	70.4052	98.6489	111.19	75.8019	114.938	UNC13B	protein_coding
1785	ENSECAG00000022033	5.50813	1.57697	1.01614	1.55192	0.120682	0.953793	9.33021	3.49687	17.7919	3.40417	7.17034	4.06184	2.52946	0	6.6884	0.608135	TOPAZ1	protein_coding
1786	ENSECAG00000048440	5.0606	-1.91009	1.23163	-1.55086	0.120936	0.953793	3.49883	0	1.18613	2.26945	3.58517	10.8316	12.6473	15.9794	0	0.608135	0	lncRNA
1787	ENSECAG00000047998	640.287	0.241522	0.15579	1.5503	0.121069	0.954186	815.227	537.352	746.074	760.264	611.869	563.242	513.48	581.918	594.153	679.287	SNRPD3	protein_coding
1788	ENSECAG00000034565	24.1039	-0.793559	0.512056	-1.54975	0.121202	0.954702	12.829	37.2999	11.8613	13.6167	11.9506	32.4947	50.5892	34.6221	21.1799	14.5953	ZNF445	protein_coding
1789	ENSECAG00000008563	97.115	-0.397567	0.256635	-1.54915	0.121345	0.954761	95.6347	74.5998	75.9121	87.3737	83.6539	127.271	151.768	69.9101	99.2113	105.816	MED25	protein_coding
1790	ENSECAG00000025052	23.8059	-0.759932	0.49048	-1.54936	0.121294	0.954761	12.829	25.6437	14.2335	22.6945	11.9506	41.9723	50.5892	16.6453	25.0815	16.4197	CBFA2T2	protein_coding
1791	ENSECAG00000010140	158.353	0.321765	0.207792	1.5485	0.121503	0.954938	234.422	166.684	180.291	148.649	149.382	167.889	117.62	137.157	154.948	126.492	MVB12A	protein_coding
1792	ENSECAG00000052078	2.76896	-2.74499	1.77237	-1.54877	0.121437	0.954938	0	0	2.37225	0	1.19506	5.41578	11.3826	7.32391	0	0	0	lncRNA
1793	ENSECAG00000004034	139.612	0.351697	0.22722	1.54782	0.121665	0.955675	170.276	167.85	123.357	201.981	119.506	129.979	107.502	131.83	147.145	96.6935	C1GALT1C1	protein_coding
1794	ENSECAG00000011608	61.152	0.496873	0.321553	1.54523	0.12229	0.956852	67.644	103.74	41.5144	68.0834	75.2885	51.45	77.1485	44.6093	40.6878	41.3532	ASPSCR1	protein_coding
1795	ENSECAG00000015786	497.056	0.286059	0.185101	1.54542	0.122244	0.956852	630.956	543.18	546.805	562.823	449.341	461.696	323.771	474.057	606.973	370.963	IMP3	protein_coding
1796	ENSECAG00000021777	47.7213	0.688446	0.445059	1.54686	0.121896	0.956852	75.808	99.0779	32.0254	43.1195	43.022	27.0789	77.1485	35.2879	17.2784	27.3661	ACTN4	protein_coding
1797	ENSECAG00000023094	1467.8	0.285222	0.18453	1.54567	0.122185	0.956852	2217.09	1889.47	1209.85	1535.28	1211.79	1251.05	1207.82	1129.21	1498.76	1527.64	MDH2	protein_coding
1798	ENSECAG00000023308	58.1374	0.680159	0.440144	1.54531	0.122271	0.956852	171.443	45.4593	42.7006	56.7361	40.6319	41.9723	74.6191	26.6324	36.7862	44.3939	0	protein_coding
1799	ENSECAG00000025153	87.0997	-0.393912	0.254801	-1.54596	0.122114	0.956852	93.3021	54.7842	94.8902	65.8139	66.9231	102.9	111.296	109.859	76.3593	94.8691	SIAH2	protein_coding
1800	ENSECAG00000055865	118.911	-0.432216	0.279504	-1.54637	0.122015	0.956852	113.129	135.212	79.4705	71.4875	105.165	159.766	188.445	130.499	129.309	76.6251	H2AJ	protein_coding
1801	ENSECAG00000000577	877.778	0.248862	0.161282	1.54303	0.122824	0.957286	1169.78	998.938	901.457	965.649	733.764	755.502	620.982	905.502	837.722	888.486	DAD1	protein_coding
1802	ENSECAG00000013079	20.2457	0.723165	0.468779	1.54266	0.122914	0.957286	30.3232	16.3187	22.5364	20.425	37.0467	13.5395	11.3826	19.9743	21.1799	9.73017	USP54	protein_coding
1803	ENSECAG00000014935	15.0302	1.66599	1.07926	1.54365	0.122674	0.957286	1.16628	24.4781	4.74451	68.0834	15.5357	17.6013	2.52946	0	16.1636	0	STK32A	protein_coding
1804	ENSECAG00000015652	14.1638	0.790534	0.511854	1.54445	0.122479	0.957286	13.9953	15.1531	15.4197	19.2903	26.2912	8.12368	8.85311	14.6478	8.91787	10.9464	ABCA2	protein_coding
1805	ENSECAG00000019432	32.1572	0.55422	0.359156	1.54312	0.122803	0.957286	47.8173	43.128	28.467	46.5236	25.0962	24.371	30.3535	24.635	25.6389	25.5417	NLRX1	protein_coding
1806	ENSECAG00000020540	11.6877	1.07608	0.697632	1.54248	0.122957	0.957286	23.3255	9.32498	27.2809	10.2125	9.56045	2.70789	8.85311	1.99743	7.80314	15.8115	DFFB	protein_coding
1807	ENSECAG00000022485	324.041	-0.320285	0.207385	-1.54439	0.122493	0.957286	269.41	318.215	315.51	219.002	316.69	430.555	445.185	248.347	400.189	277.31	MRPS18B	protein_coding
1808	ENSECAG00000037332	3383.63	-0.231837	0.150204	-1.54348	0.122714	0.957286	2817.72	2972.34	3098.16	3187.44	3481.2	4589.88	4169.81	3561.42	3180.34	2777.96	0	protein_coding
1809	ENSECAG00000046015	2.15419	2.45247	1.58883	1.54358	0.122691	0.957286	4.66511	1.16562	8.30289	1.13472	2.39011	1.35395	2.52946	0	0	0	0	lncRNA
1810	ENSECAG00000010877	31.33	0.666527	0.432281	1.54188	0.123102	0.957354	48.9836	41.9624	26.0948	22.6945	51.3874	28.4329	36.6772	15.3136	28.9831	12.7708	IFT172	protein_coding
1811	ENSECAG00000042325	4.04848	2.49747	1.61965	1.54198	0.12308	0.957354	4.66511	0	17.7919	11.3472	0	5.41578	1.26473	0	0	0	0	protein_coding
1812	ENSECAG00000000252	93.8411	0.488371	0.316853	1.54132	0.12324	0.957634	109.63	76.9311	109.124	93.0473	161.333	46.0342	65.766	54.5964	120.391	101.559	THAP4	protein_coding
1813	ENSECAG00000000891	44.8651	-0.62615	0.406431	-1.54061	0.123412	0.957634	47.8173	24.4781	34.3977	37.4459	32.2665	73.1131	31.6183	41.2802	29.5404	96.6935	LATS1	protein_coding
1814	ENSECAG00000001370	21.342	0.737396	0.478919	1.53971	0.123631	0.957634	19.8267	13.9875	46.259	19.2903	34.6566	14.8934	10.1178	20.6401	16.721	17.0278	0	protein_coding
1815	ENSECAG00000005178	50.9646	-0.625652	0.406252	-1.54006	0.123546	0.957634	37.3209	19.8156	41.5144	57.8709	43.022	67.6973	92.3253	75.2365	52.9499	21.8929	CCSAP	protein_coding
1816	ENSECAG00000020247	27.0139	-0.815869	0.529636	-1.54043	0.123455	0.957634	11.6628	12.8218	21.3503	6.80834	45.4121	17.6013	48.0597	48.6041	32.8846	24.9336	AMHR2	protein_coding
1817	ENSECAG00000020956	15.0342	-0.985968	0.640407	-1.5396	0.123659	0.957634	3.49883	19.8156	8.30289	12.482	5.97528	24.371	30.3535	13.3162	26.7536	5.47322	SERINC2	protein_coding
1818	ENSECAG00000024138	61.9727	-0.583037	0.378718	-1.5395	0.123682	0.957634	68.8103	29.1406	86.5873	36.3111	27.4863	79.8828	56.9129	98.5399	88.6213	47.4346	CREG1	protein_coding
1819	ENSECAG00000041059	2.49886	2.68121	1.74026	1.54069	0.123392	0.957634	0	4.66249	2.37225	3.40417	10.7555	0	3.79419	0	0	0	0	lncRNA
1820	ENSECAG00000023542	109.098	0.356274	0.231474	1.53915	0.123767	0.957769	117.794	104.906	143.521	114.607	132.651	94.7762	78.4133	125.838	103.67	74.8007	SH2B1	protein_coding
1821	ENSECAG00000024341	92.9802	-0.407184	0.264711	-1.53822	0.123995	0.959002	68.8103	100.243	78.2844	91.9126	59.7528	88.0065	149.238	76.5682	108.129	108.856	MAZ	protein_coding
1822	ENSECAG00000022179	323.674	0.360796	0.234729	1.53707	0.124275	0.960645	472.342	310.055	384.305	307.51	348.956	151.642	264.329	291.625	414.681	291.297	PPP4C	protein_coding
1823	ENSECAG00000003502	43.465	-0.585081	0.380741	-1.53669	0.124369	0.960843	64.1452	18.65	26.0948	40.85	23.9011	43.3263	67.0307	52.599	51.8351	46.2183	ZNF526	protein_coding
1824	ENSECAG00000022195	44.5378	-0.654378	0.426076	-1.53583	0.124581	0.9609	39.6534	51.2874	35.5838	19.2903	26.2912	55.5118	92.3253	68.5784	23.4094	33.4474	IGSF8	protein_coding
1825	ENSECAG00000040759	126.715	0.41117	0.267719	1.53583	0.124581	0.9609	201.766	118.893	132.846	139.571	131.456	58.2197	136.591	93.8792	143.243	110.681	MTLN	protein_coding
1826	ENSECAG00000047317	4.16634	2.24578	1.46222	1.53587	0.124571	0.9609	0	6.99373	13.0474	12.482	1.19506	5.41578	2.52946	0	0	0	0	lncRNA
1827	ENSECAG00000022543	19.7433	-0.77004	0.501829	-1.53447	0.124915	0.962419	19.8267	17.4843	16.6058	14.7514	4.78022	20.3092	13.912	35.2879	22.852	31.623	MANEAL	protein_coding
1828	ENSECAG00000023374	171.901	0.282614	0.184174	1.53449	0.124908	0.962419	163.279	176.009	196.897	207.654	199.574	184.137	123.944	148.476	162.751	156.291	STAG1	protein_coding
1829	ENSECAG00000012890	35.3348	-0.579321	0.377647	-1.53403	0.125023	0.962726	22.1593	43.128	28.467	28.3681	19.1209	60.9276	32.883	30.6273	39.0157	48.6508	DDX54	protein_coding
1830	ENSECAG00000001290	8.98787	-1.48039	0.965834	-1.53276	0.125336	0.96377	6.99766	5.82811	10.6751	0	0	23.0171	20.2357	11.3188	10.59	1.21627	CABP1	protein_coding
1831	ENSECAG00000008944	80.8849	0.496019	0.323636	1.53264	0.125364	0.96377	53.6487	59.4467	167.244	102.125	90.8243	78.5289	55.6481	57.9255	67.4414	76.0169	CSRP1	protein_coding
1832	ENSECAG00000012179	240.547	-0.573681	0.374234	-1.53294	0.12529	0.96377	114.295	160.856	335.674	276.872	80.0688	247.772	110.032	467.399	245.799	366.706	RGS2	protein_coding
1833	ENSECAG00000016504	587.125	0.265043	0.173012	1.53194	0.125537	0.964577	791.902	658.576	464.962	679.699	610.674	540.224	452.773	486.707	515.564	670.165	GOT2	protein_coding
1834	ENSECAG00000016305	443.691	-0.237113	0.15485	-1.53124	0.125709	0.96537	377.874	456.924	402.097	453.889	345.371	530.747	443.92	394.16	501.63	530.294	YLPM1	protein_coding
1835	ENSECAG00000011315	4.74323	-1.77341	1.15849	-1.5308	0.12582	0.965568	1.16628	1.16562	3.55838	1.13472	3.58517	2.70789	22.7651	4.66067	6.6884	0	ADGRE3	protein_coding
1836	ENSECAG00000054933	2.77739	-3.38452	2.21126	-1.53058	0.125872	0.965568	0	0	0	0	2.39011	1.35395	24.0299	0	0	0	0	lncRNA
1837	ENSECAG00000025110	362.222	0.308526	0.201633	1.53013	0.125984	0.965897	465.344	420.79	505.29	380.132	233.036	327.655	295.947	292.291	334.42	367.314	DDX17	protein_coding
1838	ENSECAG00000010081	359.428	-0.264151	0.172796	-1.52869	0.126342	0.968119	326.557	331.037	359.396	288.22	326.25	392.644	457.832	478.717	321.043	312.582	CDC5L	protein_coding
1839	ENSECAG00000023757	93.2207	0.410875	0.268886	1.52806	0.126497	0.968779	163.279	90.9185	79.4705	94.182	105.165	78.5289	65.766	67.9126	103.67	83.3146	FITM2	protein_coding
1840	ENSECAG00000007066	8.65008	-1.60044	1.04809	-1.52701	0.126759	0.969388	5.83138	5.82811	5.93064	0	3.58517	14.8934	39.2066	7.32391	3.90157	0	RASSF4	protein_coding
1841	ENSECAG00000013348	13.8546	1.28988	0.844549	1.52729	0.126688	0.969388	10.4965	3.49687	21.3503	7.94306	54.9726	10.8316	6.32365	11.9846	11.1473	0	LIMCH1	protein_coding
1842	ENSECAG00000016917	652.991	-0.309617	0.202917	-1.52583	0.127051	0.969388	471.176	821.764	475.637	697.855	450.536	663.434	615.924	966.756	650.447	716.384	TES	protein_coding
1843	ENSECAG00000019453	42.9228	-0.555287	0.363899	-1.52594	0.127026	0.969388	25.6581	33.803	37.9561	41.9847	33.4616	50.096	78.4133	43.2777	26.1962	58.381	H6PD	protein_coding
1844	ENSECAG00000020893	75.0979	-0.415237	0.272041	-1.52638	0.126916	0.969388	65.3115	55.9499	66.4231	73.757	59.7528	75.821	116.355	67.2468	105.9	64.4624	ZC2HC1A	protein_coding
1845	ENSECAG00000021482	10.3986	0.944374	0.618935	1.52581	0.127058	0.969388	6.99766	13.9875	11.8613	23.8292	11.9506	6.76973	5.05892	11.3188	6.13104	6.08135	TAF6L	protein_coding
1846	ENSECAG00000033773	28.1566	-0.710775	0.465525	-1.52683	0.126804	0.969388	30.3232	12.8218	13.0474	29.5028	20.316	41.9723	54.3834	13.982	31.7699	33.4474	SFT2D3	protein_coding
1847	ENSECAG00000018175	16.6418	-0.775247	0.508207	-1.52546	0.127145	0.969527	13.9953	11.6562	17.7919	7.94306	9.56045	23.0171	30.3535	19.9743	21.1799	10.9464	0	protein_coding
1848	ENSECAG00000006216	294.242	-0.34257	0.225112	-1.52177	0.128066	0.971205	275.241	145.703	291.787	213.328	370.467	370.981	346.536	342.892	282.028	303.46	KIAA2026	protein_coding
1849	ENSECAG00000010665	74.3563	0.432254	0.283713	1.52356	0.127619	0.971205	97.9672	104.906	86.5873	89.6431	48.9973	55.5118	55.6481	51.2674	75.8019	77.2332	GEMIN8	protein_coding
1850	ENSECAG00000012069	296.802	-0.316843	0.207972	-1.52349	0.127635	0.971205	267.077	258.768	311.951	243.965	237.816	295.16	500.833	250.345	333.305	268.796	MARCHF6	protein_coding
1851	ENSECAG00000013266	67.3893	-0.642119	0.421957	-1.52176	0.128068	0.971205	20.993	45.4593	84.215	40.85	70.5083	105.608	134.061	81.8946	30.0978	60.2054	PATJ	protein_coding
1852	ENSECAG00000014090	5070.07	-0.194408	0.127726	-1.52207	0.127991	0.971205	4129.79	5214.99	4815.68	4262.02	5218.81	5704.17	6362.86	5172.01	4811.75	5008.6	RPL10A	protein_coding
1853	ENSECAG00000015256	123.789	-0.344026	0.225754	-1.5239	0.127534	0.971205	80.4731	124.722	119.799	128.224	92.0193	161.12	121.414	111.19	143.243	155.683	SPAG9	protein_coding
1854	ENSECAG00000017264	3.17282	2.14558	1.41021	1.52146	0.128145	0.971205	6.99766	2.33124	13.0474	3.40417	0	1.35395	1.26473	3.32905	0	0	FAM171A2	protein_coding
1855	ENSECAG00000024945	209.235	-0.409604	0.269252	-1.52127	0.128193	0.971205	176.108	184.168	225.364	152.053	158.942	259.958	359.183	269.653	195.636	111.289	ECH1	protein_coding
1856	ENSECAG00000051299	3.01567	2.90487	1.90894	1.52172	0.128079	0.971205	0	0	14.2335	0	11.9506	2.70789	1.26473	0	0	0	0	lncRNA
1857	ENSECAG00000052302	1276.51	0.29166	0.191642	1.5219	0.128035	0.971205	2203.1	1278.69	1205.11	1127.91	1210.59	1079.1	1271.05	920.15	1278.04	1191.34	KDELR2	protein_coding
1858	ENSECAG00000052974	2.54774	-2.61393	1.71779	-1.52168	0.12809	0.971205	0	0	0	0	3.58517	10.8316	0	1.33162	6.6884	3.04068	0	lncRNA
1859	ENSECAG00000054486	12.6503	-1.05846	0.695613	-1.52162	0.128105	0.971205	0	10.4906	3.55838	13.6167	13.1456	23.0171	20.2357	11.9846	19.5078	10.9464	0	protein_coding
1860	ENSECAG00000000095	140.183	0.308204	0.209332	1.47232	0.140934	0.972041	192.436	130.55	124.543	164.535	164.918	112.378	112.561	133.828	149.932	116.154	GOT1	protein_coding
1861	ENSECAG00000000671	20.2167	0.780318	0.514026	1.51805	0.129002	0.972041	36.1546	29.1406	15.4197	18.1556	29.8764	12.1855	7.58838	7.98972	26.1962	19.4603	LRRC27	protein_coding
1862	ENSECAG00000001643	3.53185	-2.30586	1.53342	-1.50374	0.132648	0.972041	0	4.66249	0	0	1.19506	10.8316	11.3826	0	0.557367	6.68949	KCNJ11	protein_coding
1863	ENSECAG00000002250	521.765	-0.309817	0.208934	-1.48284	0.138116	0.972041	454.848	733.176	386.677	329.07	426.635	532.101	550.158	730.394	533.958	540.632	SPRY2	protein_coding
1864	ENSECAG00000002550	23.9301	-0.665524	0.441993	-1.50574	0.132135	0.972041	12.829	23.3124	10.6751	23.8292	21.511	44.6802	20.2357	31.9589	22.2947	27.9742	0	protein_coding
1865	ENSECAG00000003159	25.564	0.66593	0.441084	1.50976	0.131106	0.972041	16.3279	30.3062	23.7225	44.2542	43.022	17.6013	12.6473	19.9743	29.5404	18.2441	DOK6	protein_coding
1866	ENSECAG00000003314	4.63993	-1.98383	1.31892	-1.50413	0.132547	0.972041	1.16628	1.16562	0	2.26945	4.78022	0	15.1768	0	7.24577	14.5953	POMGNT2	protein_coding
1867	ENSECAG00000003368	999.167	0.242383	0.160031	1.5146	0.129873	0.972041	1361.04	1198.26	1010.58	950.898	896.292	759.564	866.34	1063.96	846.64	1038.09	G3BP1	protein_coding
1868	ENSECAG00000003539	8.73594	1.35389	0.908643	1.49002	0.13622	0.972041	13.9953	5.82811	15.4197	27.2333	0	9.47762	3.79419	0.66581	6.6884	4.25695	GATB	protein_coding
1869	ENSECAG00000004450	15.5569	-0.825209	0.556297	-1.4834	0.137969	0.972041	18.6604	12.8218	7.11676	5.67361	11.9506	18.9552	16.4415	33.2905	10.59	20.0685	ZBTB5	protein_coding
1870	ENSECAG00000004829	50.1856	-0.502833	0.34059	-1.47636	0.139848	0.972041	36.1546	52.453	58.1202	32.907	27.4863	46.0342	89.7958	51.9332	60.753	46.2183	SYNJ1	protein_coding
1871	ENSECAG00000005097	91.2823	-0.442803	0.298736	-1.48226	0.138272	0.972041	128.29	68.7717	54.5618	56.7361	77.6786	106.962	141.65	83.8921	117.047	77.2332	IFI27L2	protein_coding
1872	ENSECAG00000005457	571.114	-0.248913	0.168749	-1.47505	0.140199	0.972041	612.295	590.97	393.794	481.122	529.41	670.203	704.455	673.8	487.696	567.39	SF3B5	protein_coding
1873	ENSECAG00000005608	946.756	-0.190704	0.126974	-1.50191	0.13312	0.972041	745.251	932.498	839.778	991.748	911.828	1056.08	959.93	1087.27	1019.42	923.758	TOP2B	protein_coding
1874	ENSECAG00000006302	84.6245	0.442283	0.296648	1.49093	0.135979	0.972041	101.466	82.7592	69.9815	85.1042	146.992	109.67	54.3834	60.5887	56.8514	78.4495	SLC25A29	protein_coding
1875	ENSECAG00000006736	18.2018	1.06819	0.724162	1.47507	0.140195	0.972041	1.16628	31.4718	11.8613	24.9639	53.7775	17.6013	5.05892	17.9769	14.4915	3.64881	FANCC	protein_coding
1876	ENSECAG00000006755	5.5978	1.69872	1.12493	1.51007	0.131027	0.972041	15.1616	13.9875	11.8613	1.13472	1.19506	0	0	6.6581	1.11473	4.86508	RAB3IL1	protein_coding
1877	ENSECAG00000006987	23.656	-0.697969	0.468335	-1.49032	0.13614	0.972041	22.1593	22.1468	21.3503	13.6167	10.7555	24.371	41.7361	24.635	41.8025	13.9871	IKZF5	protein_coding
1878	ENSECAG00000007148	108.341	-0.455396	0.305613	-1.49011	0.136196	0.972041	149.283	57.1155	72.3537	111.203	66.9231	132.687	108.767	177.771	120.949	86.3552	CEP128	protein_coding
1879	ENSECAG00000007179	70.3174	0.458553	0.309749	1.4804	0.138766	0.972041	136.454	54.7842	73.5399	82.8348	59.7528	46.0342	64.5012	72.5733	51.2778	61.4217	SPCS2	protein_coding
1880	ENSECAG00000007330	7.1703	1.37587	0.914355	1.50474	0.13239	0.972041	3.49883	16.3187	15.4197	1.13472	15.5357	1.35395	6.32365	0.66581	7.80314	3.64881	ALS2CL	protein_coding
1881	ENSECAG00000007525	69.9859	-0.401405	0.268229	-1.4965	0.134524	0.972041	50.1499	67.6061	54.5618	59.0056	69.3133	86.6525	96.1195	54.5964	72.4577	89.3959	CPSF4	protein_coding
1882	ENSECAG00000007723	47.3819	-0.603024	0.398071	-1.51486	0.129807	0.972041	71.1429	25.6437	36.7699	36.3111	17.9258	39.2644	88.5311	55.2622	57.9662	45.002	FBXO8	protein_coding
1883	ENSECAG00000008015	37.702	-0.629483	0.416605	-1.51099	0.130792	0.972041	36.1546	45.4593	23.7225	14.7514	27.4863	56.8657	46.795	63.252	21.1799	41.3532	SHB	protein_coding
1884	ENSECAG00000008108	41.4765	0.585055	0.396192	1.4767	0.139757	0.972041	59.4801	66.4405	37.9561	23.8292	62.1429	29.7868	18.971	53.9306	31.2125	31.0149	PLEKHM3	protein_coding
1885	ENSECAG00000008614	40.0316	-0.550521	0.366212	-1.50329	0.132765	0.972041	16.3279	31.4718	41.5144	23.8292	48.9973	52.8039	51.8539	51.9332	45.7041	35.88	LLGL2	protein_coding
1886	ENSECAG00000008643	136.879	0.317577	0.210301	1.5101	0.131017	0.972041	149.283	134.047	161.313	138.436	178.063	124.563	87.2664	129.167	117.047	149.601	EXPH5	protein_coding
1887	ENSECAG00000008742	660.662	0.223703	0.148319	1.50826	0.131489	0.972041	773.241	611.952	685.581	721.684	768.421	617.399	495.774	753.031	590.252	589.283	CAPN2	protein_coding
1888	ENSECAG00000008904	30.8951	0.616881	0.413711	1.49109	0.135937	0.972041	40.8197	36.1343	15.4197	43.1195	52.5825	14.8934	20.2357	29.2956	27.8683	28.5824	ZNF346	protein_coding
1889	ENSECAG00000008933	7.75184	-1.75375	1.16229	-1.50888	0.13133	0.972041	0	3.49687	9.48902	0	4.78022	2.70789	22.7651	11.9846	22.2947	0	GLS2	protein_coding
1890	ENSECAG00000009675	111.463	-0.501807	0.334911	-1.49833	0.134048	0.972041	81.6394	88.5873	97.2624	88.5084	102.775	217.985	197.298	97.8741	82.4903	60.2054	N4BP2	protein_coding
1891	ENSECAG00000009877	46.6335	-0.816264	0.552905	-1.47632	0.139859	0.972041	47.8173	36.1343	41.5144	30.6375	13.1456	81.2368	2.52946	65.2494	63.5398	84.5308	HSPA4L	protein_coding
1892	ENSECAG00000010094	229.77	0.326868	0.217899	1.50009	0.133591	0.972041	330.056	213.309	295.346	221.271	218.695	158.412	240.299	239.692	147.702	232.916	SLC25A36	protein_coding
1893	ENSECAG00000010109	2.72309	-2.76292	1.84584	-1.49683	0.134437	0.972041	0	0	2.37225	1.13472	0	1.35395	5.05892	17.3111	0	0	IGF1	protein_coding
1894	ENSECAG00000010189	15.8307	1.08608	0.714942	1.51912	0.128732	0.972041	17.4941	33.803	18.978	15.8861	22.7061	4.06184	0	7.32391	29.5404	8.5139	TAF9B	protein_coding
1895	ENSECAG00000010349	362.94	0.238415	0.161708	1.47435	0.140388	0.972041	506.164	347.355	365.327	384.671	362.102	335.779	294.682	308.936	372.878	351.502	CIART	protein_coding
1896	ENSECAG00000010356	60.5056	-0.530795	0.360217	-1.47354	0.140605	0.972041	45.4848	47.7905	37.9561	32.907	82.4589	82.5907	97.3842	82.5604	61.8677	34.0556	FAM78A	protein_coding
1897	ENSECAG00000010641	12.0207	0.959269	0.637636	1.50441	0.132475	0.972041	25.6581	3.49687	16.6058	13.6167	20.316	8.12368	5.05892	11.3188	11.1473	4.86508	UNKL	protein_coding
1898	ENSECAG00000010713	14.7486	-1.22153	0.818784	-1.49188	0.135731	0.972041	9.33021	15.1531	4.74451	12.482	2.39011	28.4329	25.2946	0	35.6715	13.9871	KCNMA1	protein_coding
1899	ENSECAG00000010803	108.244	0.389166	0.256934	1.51465	0.12986	0.972041	129.457	139.875	135.218	129.358	82.4589	62.2815	73.3543	119.18	110.916	100.342	ADO	protein_coding
1900	ENSECAG00000010856	470.106	-0.400563	0.269511	-1.48626	0.137211	0.972041	297.401	280.915	510.035	420.982	515.069	636.355	772.75	313.597	643.201	310.757	TSHZ2	protein_coding
1901	ENSECAG00000011008	2.254	-2.48443	1.64282	-1.5123	0.130458	0.972041	2.33255	0	0	1.13472	0	1.35395	0	7.98972	6.6884	3.04068	MCOLN2	protein_coding
1902	ENSECAG00000011145	18.5647	1.09243	0.728705	1.49914	0.133837	0.972041	5.83138	10.4906	64.0509	34.0417	11.9506	1.35395	22.7651	18.6427	5.57367	10.9464	PTGER4	protein_coding
1903	ENSECAG00000011253	164.192	-0.337635	0.228971	-1.47458	0.140326	0.972041	114.295	156.193	144.707	183.825	125.481	171.951	220.063	227.041	176.128	122.235	SECISBP2L	protein_coding
1904	ENSECAG00000011724	678.392	0.266172	0.179597	1.48205	0.138326	0.972041	664.778	748.329	804.194	773.881	717.034	525.331	447.714	677.129	867.263	558.268	ADCY10	protein_coding
1905	ENSECAG00000011744	9.65962	1.57658	1.06206	1.48445	0.137689	0.972041	34.9883	0	11.8613	10.2125	15.5357	6.76973	0	0	11.1473	6.08135	SBSPON	protein_coding
1906	ENSECAG00000011933	222.343	0.300283	0.203396	1.47634	0.139851	0.972041	242.586	299.565	221.806	276.872	185.234	212.57	198.563	243.021	144.358	198.86	DHX9	protein_coding
1907	ENSECAG00000012036	210.862	-0.280671	0.188846	-1.48624	0.137217	0.972041	162.112	177.175	189.78	208.789	212.72	305.992	198.563	200.409	213.472	239.605	PAIP2	protein_coding
1908	ENSECAG00000012082	49.2097	0.512293	0.343828	1.48997	0.136233	0.972041	39.6534	60.6123	79.4705	68.0834	41.827	27.0789	51.8539	31.2931	55.7367	36.4881	MLLT6	protein_coding
1909	ENSECAG00000012118	41.2221	-0.60697	0.406018	-1.49493	0.134932	0.972041	51.3162	31.4718	23.7225	21.5597	34.6566	35.2026	91.0606	47.2725	47.3762	28.5824	ARNTL	protein_coding
1910	ENSECAG00000012309	119.737	0.396162	0.266342	1.48742	0.136904	0.972041	173.775	89.7529	109.124	153.188	155.357	121.855	60.707	112.522	96.4245	124.668	SFXN4	protein_coding
1911	ENSECAG00000012654	367.319	0.251856	0.167547	1.5032	0.132788	0.972041	459.513	455.758	367.699	418.713	295.179	362.858	292.153	314.262	362.846	344.205	EMC10	protein_coding
1912	ENSECAG00000012667	2.65092	-3.31006	2.22966	-1.48456	0.13766	0.972041	0	0	0	0	2.39011	1.35395	22.7651	0	0	0	RBFOX1	protein_coding
1913	ENSECAG00000012751	30.0018	0.727855	0.490011	1.48539	0.137442	0.972041	29.1569	16.3187	69.9815	56.7361	15.5357	20.3092	13.912	21.9717	25.0815	31.0149	CCKBR	protein_coding
1914	ENSECAG00000012984	10.3723	1.02978	0.681698	1.51061	0.130888	0.972041	20.993	12.8218	13.0474	15.8861	7.17034	6.76973	5.05892	3.32905	15.6063	3.04068	FSD1L	protein_coding
1915	ENSECAG00000013231	319.978	0.423538	0.285316	1.48445	0.137689	0.972041	730.089	327.54	306.021	248.504	222.28	208.508	252.946	275.645	353.371	274.877	CLPTM1L	protein_coding
1916	ENSECAG00000013350	8.40522	-1.29085	0.861996	-1.49751	0.134261	0.972041	3.49883	3.49687	3.55838	10.2125	3.58517	21.6631	0	17.3111	6.13104	14.5953	HOMER1	protein_coding
1917	ENSECAG00000013367	36.3723	0.680837	0.453595	1.50098	0.133361	0.972041	24.4918	60.6123	47.4451	22.6945	68.1182	18.9552	50.5892	16.6453	19.5078	34.6637	SLC9A3R2	protein_coding
1918	ENSECAG00000013693	561.737	0.336677	0.228576	1.47293	0.140769	0.972041	314.895	667.901	897.898	660.409	592.748	614.692	469.215	387.501	512.22	499.887	COL1A1	protein_coding
1919	ENSECAG00000013723	5.99237	-1.40586	0.943944	-1.48934	0.136397	0.972041	1.16628	6.99373	7.11676	1.13472	0	9.47762	8.85311	9.32134	12.8194	3.04068	SLC7A8	protein_coding
1920	ENSECAG00000014198	525.29	0.229952	0.155191	1.48174	0.138411	0.972041	559.813	515.205	581.202	610.481	571.237	496.898	359.183	569.933	539.531	449.412	MTCH2	protein_coding
1921	ENSECAG00000014284	110.579	0.338785	0.228921	1.47992	0.138894	0.972041	124.792	131.715	126.916	132.763	103.97	69.0512	84.7369	103.866	127.637	100.342	OPA3	protein_coding
1922	ENSECAG00000014304	52.031	0.496065	0.332335	1.49267	0.135525	0.972041	47.8173	92.0841	34.3977	70.3528	59.7528	36.5565	50.5892	37.9512	37.9009	52.9078	ATP11A	protein_coding
1923	ENSECAG00000014737	106.612	0.365095	0.241387	1.51249	0.130409	0.972041	83.9719	159.69	93.704	133.897	127.871	96.1302	108.767	81.8946	91.4082	88.7878	HEATR5B	protein_coding
1924	ENSECAG00000014794	10.2125	0.926627	0.613858	1.50951	0.131168	0.972041	19.8267	8.15935	14.2335	7.94306	16.7308	5.41578	8.85311	7.98972	4.45894	8.5139	MIIP	protein_coding
1925	ENSECAG00000014867	361.377	-0.443289	0.293458	-1.51057	0.130898	0.972041	382.539	556.002	156.569	173.613	262.912	326.301	494.509	432.111	490.483	338.731	PLBD1	protein_coding
1926	ENSECAG00000014941	426.698	-0.868315	0.582548	-1.49055	0.13608	0.972041	731.255	88.5873	176.733	295.028	218.695	728.423	173.268	691.111	555.137	608.744	INPP5F	protein_coding
1927	ENSECAG00000014990	157.718	-0.316906	0.212389	-1.4921	0.135673	0.972041	179.607	120.059	118.613	147.514	135.041	167.889	230.181	144.481	154.391	179.4	ZCCHC2	protein_coding
1928	ENSECAG00000015182	366.411	-0.313429	0.211419	-1.4825	0.138207	0.972041	498	290.24	345.163	216.732	284.423	369.627	408.508	371.522	488.253	391.639	OSBPL1A	protein_coding
1929	ENSECAG00000015365	2.75977	2.47357	1.67598	1.4759	0.139972	0.972041	0	3.49687	11.8613	2.26945	5.97528	0	0	3.99486	0	0	GCSAML	protein_coding
1930	ENSECAG00000015448	126.425	-0.564743	0.375438	-1.50423	0.132523	0.972041	107.297	101.409	51.0035	108.933	139.822	205.8	231.446	135.159	143.243	40.1369	TAPBP	protein_coding
1931	ENSECAG00000016173	120.392	-0.350559	0.236169	-1.48436	0.137714	0.972041	69.9766	107.237	128.102	124.82	97.9946	152.996	142.914	155.8	117.047	107.032	TK1	protein_coding
1932	ENSECAG00000016319	78.981	-0.500242	0.332642	-1.50385	0.132621	0.972041	79.3068	65.2748	65.237	87.3737	28.6813	88.0065	147.973	69.2442	66.884	91.8284	ZBTB40	protein_coding
1933	ENSECAG00000016476	32.4071	-0.700024	0.467832	-1.49632	0.134571	0.972041	13.9953	18.65	29.6532	35.1764	25.0962	39.2644	74.6191	47.9383	18.3931	21.2847	VPS18	protein_coding
1934	ENSECAG00000016488	202.611	-0.266312	0.177818	-1.49766	0.134221	0.972041	187.771	215.64	164.872	152.053	199.574	200.384	245.358	203.072	212.914	244.47	RCN2	protein_coding
1935	ENSECAG00000016585	745.676	-0.246488	0.165739	-1.48721	0.13696	0.972041	602.965	874.217	742.516	600.268	592.748	800.182	655.13	728.396	927.459	932.88	SUPT4H1	protein_coding
1936	ENSECAG00000016735	7.81935	-1.77234	1.17839	-1.50404	0.132571	0.972041	11.6628	4.66249	0	0	1.19506	24.371	21.5004	5.32648	9.47524	0	VCAM1	protein_coding
1937	ENSECAG00000016812	17.4494	1.10008	0.743487	1.47962	0.138976	0.972041	9.33021	23.3124	45.0728	9.07778	32.2665	14.8934	3.79419	24.635	0.557367	11.5546	ZNF350	protein_coding
1938	ENSECAG00000016976	5.13556	2.05655	1.38375	1.48622	0.137221	0.972041	24.4918	4.66249	1.18613	9.07778	1.19506	9.47762	1.26473	0	0	0	RARB	protein_coding
1939	ENSECAG00000017221	287.778	0.412392	0.279913	1.47328	0.140674	0.972041	386.038	287.909	454.287	184.96	331.031	148.934	313.653	155.134	356.157	259.674	GNB2	protein_coding
1940	ENSECAG00000017249	73.1225	-0.43005	0.291663	-1.47448	0.140353	0.972041	57.1476	79.2623	60.4925	71.4875	41.827	79.8828	126.473	61.9203	72.4577	80.2739	TRPS1	protein_coding
1941	ENSECAG00000017288	137.027	0.311921	0.207624	1.50233	0.133012	0.972041	122.459	164.353	156.569	170.208	145.797	129.979	101.178	136.491	100.326	142.912	CHFR	protein_coding
1942	ENSECAG00000017463	75.8669	-0.536545	0.361621	-1.48372	0.137883	0.972041	34.9883	50.1217	71.1676	52.1973	100.385	62.2815	164.415	81.2288	84.7198	57.1647	PCMTD2	protein_coding
1943	ENSECAG00000017504	389.723	-0.235287	0.158763	-1.482	0.138339	0.972041	391.869	286.743	399.725	350.629	360.907	395.352	470.48	346.221	445.894	449.412	QKI	protein_coding
1944	ENSECAG00000017692	109.966	0.304639	0.204604	1.48892	0.136509	0.972041	127.124	102.575	117.427	140.706	119.506	93.4223	108.767	88.5527	96.9818	104.599	ANAPC4	protein_coding
1945	ENSECAG00000017757	63.9479	0.472743	0.320511	1.47497	0.140221	0.972041	65.3115	54.7842	71.1676	81.7	99.1897	62.2815	31.6183	83.2263	44.5894	45.6102	RPTOR	protein_coding
1946	ENSECAG00000017933	7.198	1.59017	1.07847	1.47447	0.140355	0.972041	19.8267	0	8.30289	18.1556	8.36539	1.35395	0	1.33162	12.8194	1.82441	FCHSD1	protein_coding
1947	ENSECAG00000018034	36.5981	0.805066	0.543088	1.48239	0.138238	0.972041	83.9719	54.7842	52.1896	31.7722	10.7555	28.4329	11.3826	10.653	54.0646	27.9742	METTL9	protein_coding
1948	ENSECAG00000018059	237.683	0.401529	0.269027	1.49252	0.135562	0.972041	247.251	256.437	243.156	378.997	229.451	163.827	118.885	312.265	277.569	148.993	SC5D	protein_coding
1949	ENSECAG00000018173	90.8193	0.420775	0.27876	1.50945	0.131183	0.972041	103.799	114.231	93.704	72.6223	135.041	63.6355	107.502	49.2699	87.5066	80.882	SNX15	protein_coding
1950	ENSECAG00000018288	185.609	-0.48212	0.326285	-1.47761	0.139513	0.972041	85.1382	220.303	113.868	197.442	156.552	228.817	318.712	80.563	215.701	238.997	C5H1orf21	protein_coding
1951	ENSECAG00000018638	7.30819	1.34936	0.897777	1.503	0.13284	0.972041	26.8244	9.32498	1.18613	10.2125	4.78022	8.12368	1.26473	1.33162	3.3442	6.68949	SLC16A14	protein_coding
1952	ENSECAG00000019004	68.2433	0.395468	0.266695	1.48284	0.138116	0.972041	89.8033	78.0967	53.3757	70.3528	96.7995	50.096	59.4423	53.9306	62.4251	68.1112	MCAT	protein_coding
1953	ENSECAG00000019132	163.361	-0.277635	0.186156	-1.49141	0.135853	0.972041	177.274	123.556	134.032	161.131	143.407	155.704	180.856	175.774	187.275	194.603	SLMAP	protein_coding
1954	ENSECAG00000019292	47.0362	0.553633	0.375994	1.47245	0.140899	0.972041	64.1452	46.6249	71.1676	69.2181	28.6813	50.096	24.0299	38.617	54.0646	23.7173	TCAIM	protein_coding
1955	ENSECAG00000019333	40.8044	-0.532701	0.356122	-1.49584	0.134696	0.972041	51.3162	33.803	28.467	30.6375	22.7061	55.5118	32.883	65.9152	41.8025	45.002	ARL4A	protein_coding
1956	ENSECAG00000019455	79.9416	-0.490103	0.331735	-1.47739	0.139571	0.972041	68.8103	83.9248	20.1642	88.5084	70.5083	105.608	101.178	81.2288	99.2113	80.2739	NIPAL1	protein_coding
1957	ENSECAG00000019463	13.7943	1.11768	0.740725	1.5089	0.131323	0.972041	43.1522	5.82811	16.6058	17.0208	11.9506	14.8934	0	5.99229	6.6884	15.8115	B3GNT6	protein_coding
1958	ENSECAG00000019591	38.0817	0.639084	0.422216	1.51364	0.130117	0.972041	53.6487	55.9499	35.5838	20.425	65.7281	24.371	44.2656	35.2879	13.9342	31.623	ANKRD28	protein_coding
1959	ENSECAG00000019658	15.4181	1.03183	0.690716	1.49385	0.135214	0.972041	17.4941	24.4781	21.3503	27.2333	13.1456	16.2474	0	11.9846	2.78683	19.4603	AP3B2	protein_coding
1960	ENSECAG00000019974	56.0683	0.441227	0.298151	1.47988	0.138906	0.972041	74.6417	60.6123	60.4925	79.4306	48.9973	43.3263	32.883	59.2571	59.0809	41.9613	CFAP298-TCP10L	protein_coding
1961	ENSECAG00000020058	49.7102	0.531534	0.351648	1.51155	0.130648	0.972041	46.6511	44.2936	58.1202	88.5084	57.3627	29.7868	32.883	41.946	30.6552	66.8949	PNPT1	protein_coding
1962	ENSECAG00000020301	30.3503	0.80775	0.533817	1.51316	0.130239	0.972041	37.3209	34.9687	41.5144	15.8861	64.533	20.3092	6.32365	9.32134	29.5404	43.7858	ELAPOR1	protein_coding
1963	ENSECAG00000020303	104.271	0.435207	0.294862	1.47597	0.139952	0.972041	130.623	123.556	113.868	120.281	113.53	59.5736	56.9129	139.154	123.178	62.0298	UGGT2	protein_coding
1964	ENSECAG00000020488	71.0134	0.421276	0.286107	1.47244	0.140901	0.972041	54.815	57.1155	84.215	99.8556	111.14	60.9276	51.8539	60.5887	72.4577	57.1647	TLN2	protein_coding
1965	ENSECAG00000020501	333.232	0.278895	0.184297	1.51329	0.130205	0.972041	375.541	441.771	345.163	358.572	308.324	273.497	242.828	262.995	321.043	402.586	ARHGDIA	protein_coding
1966	ENSECAG00000020679	75.6148	-0.418774	0.28265	-1.4816	0.138447	0.972041	47.8173	57.1155	85.4011	68.0834	64.533	105.608	80.9427	111.856	75.8019	58.9891	SMARCC2	protein_coding
1967	ENSECAG00000020977	21.2967	-0.835945	0.559675	-1.49363	0.135273	0.972041	16.3279	13.9875	1.18613	13.6167	31.0715	29.7868	36.6772	26.6324	21.1799	22.501	TCEA2	protein_coding
1968	ENSECAG00000021234	540.434	-0.249965	0.166222	-1.50381	0.132631	0.972041	470.009	639.927	435.309	541.263	380.028	632.293	662.719	535.977	547.334	559.485	NET1	protein_coding
1969	ENSECAG00000021250	3.13601	2.45707	1.64322	1.49527	0.134843	0.972041	6.99766	0	7.11676	2.26945	9.56045	5.41578	0	0	0	0	EXD1	protein_coding
1970	ENSECAG00000021303	35.8973	-0.636239	0.429856	-1.48012	0.138841	0.972041	20.993	19.8156	30.8393	18.1556	50.1924	52.8039	58.1776	19.9743	35.1141	52.9078	CCNJL	protein_coding
1971	ENSECAG00000021306	80.7051	-0.36895	0.248408	-1.48526	0.137475	0.972041	57.1476	62.9436	79.4705	79.4306	74.0935	73.1131	93.59	75.9023	109.801	101.559	CNOT10	protein_coding
1972	ENSECAG00000021390	24.4941	0.70449	0.46912	1.50173	0.133168	0.972041	23.3255	16.3187	34.3977	43.1195	33.4616	21.6631	29.0888	22.6375	10.59	10.3383	CCDC39	protein_coding
1973	ENSECAG00000021424	19.0047	-0.828013	0.555538	-1.49047	0.1361	0.972041	5.83138	16.3187	16.6058	9.07778	20.316	13.5395	50.5892	19.3085	25.0815	13.379	LMNTD1	protein_coding
1974	ENSECAG00000021690	380.175	0.269295	0.17926	1.50226	0.13303	0.972041	359.213	349.687	444.798	504.952	419.465	384.521	282.035	405.478	377.337	274.269	NDUFS6	protein_coding
1975	ENSECAG00000021742	170.335	-0.409808	0.276279	-1.48331	0.137992	0.972041	152.782	142.206	144.707	179.286	113.53	186.845	118.885	306.273	119.834	238.997	MYO5A	protein_coding
1976	ENSECAG00000021756	73.7806	0.401785	0.271027	1.48245	0.13822	0.972041	97.9672	65.2748	60.4925	94.182	102.775	44.6802	72.0896	69.9101	63.5398	66.8949	MASP2	protein_coding
1977	ENSECAG00000021812	37.4925	0.630623	0.425408	1.48239	0.138236	0.972041	31.4895	44.2936	30.8393	43.1195	77.6786	33.8487	29.0888	47.2725	24.5241	12.7708	STARD5	protein_coding
1978	ENSECAG00000021844	4.71005	-1.44036	0.95576	-1.50703	0.131802	0.972041	4.66511	1.16562	0	4.53889	2.39011	5.41578	5.05892	4.66067	9.47524	9.73017	CALML4	protein_coding
1979	ENSECAG00000022298	25.0862	0.833186	0.560588	1.48627	0.137207	0.972041	32.6557	30.3062	48.6312	13.6167	35.8517	18.9552	7.58838	44.6093	8.91787	9.73017	RPGRIP1L	protein_coding
1980	ENSECAG00000022300	90.7459	-0.543265	0.361703	-1.50196	0.133106	0.972041	115.461	38.4655	48.6312	38.5806	127.871	139.456	93.59	113.854	80.2608	111.289	STOX1	protein_coding
1981	ENSECAG00000022308	194.16	-0.402069	0.266981	-1.50599	0.132071	0.972041	167.944	177.175	151.824	167.939	168.503	282.975	354.124	119.846	162.751	188.522	WT1	protein_coding
1982	ENSECAG00000022933	674.575	-0.211818	0.141593	-1.49596	0.134665	0.972041	688.103	613.117	680.837	615.02	525.825	809.66	772.75	761.021	608.645	670.773	ELL2	protein_coding
1983	ENSECAG00000022984	25.4607	-0.702547	0.469218	-1.49727	0.134323	0.972041	23.3255	10.4906	30.8393	12.482	19.1209	40.6184	41.7361	36.6196	15.0489	24.3254	ZFHX3	protein_coding
1984	ENSECAG00000023441	52.247	0.547432	0.369827	1.48024	0.138809	0.972041	60.6464	54.7842	62.8647	89.6431	44.2171	29.7868	17.7062	57.9255	43.4746	61.4217	E2F3	protein_coding
1985	ENSECAG00000023492	5.06314	2.057	1.37588	1.49504	0.134904	0.972041	3.49883	0	15.4197	6.80834	14.3407	6.76973	3.79419	0	0	0	TMC1	protein_coding
1986	ENSECAG00000023535	289.356	0.336409	0.226096	1.4879	0.136777	0.972041	355.714	286.743	440.053	302.971	231.841	231.525	169.474	316.926	326.617	231.7	PKDCC	protein_coding
1987	ENSECAG00000023726	255.614	0.275663	0.185287	1.48776	0.136813	0.972041	229.756	289.074	270.437	347.225	265.302	232.879	169.474	271.651	241.34	238.997	UBAP2	protein_coding
1988	ENSECAG00000024078	142.462	0.377004	0.249373	1.51181	0.130583	0.972041	251.916	157.359	149.452	148.649	97.9946	123.209	110.032	136.491	138.227	111.289	MKLN1	protein_coding
1989	ENSECAG00000024358	17.567	-1.03536	0.684407	-1.51278	0.130334	0.972041	22.1593	3.49687	23.7225	4.53889	3.58517	20.3092	31.6183	43.9435	8.91787	13.379	ZBTB16	protein_coding
1990	ENSECAG00000024525	3.85144	-2.18118	1.44886	-1.50545	0.132209	0.972041	0	0	0	6.80834	0	9.47762	13.912	5.32648	0.557367	2.43254	TMED6	protein_coding
1991	ENSECAG00000024831	233.997	0.335675	0.225918	1.48583	0.137325	0.972041	296.234	258.768	232.481	298.432	223.475	125.917	156.827	238.36	235.209	274.269	DCTPP1	protein_coding
1992	ENSECAG00000025039	80.2408	0.438529	0.293026	1.49655	0.134509	0.972041	108.464	89.7529	94.8902	125.954	43.022	56.8657	70.8249	77.234	69.1135	66.2868	RNF185	protein_coding
1993	ENSECAG00000025101	26.9904	-1.12962	0.751151	-1.50385	0.13262	0.972041	19.8267	20.9812	1.18613	10.2125	32.2665	2.70789	102.443	10.653	30.0978	39.5288	NELL2	protein_coding
1994	ENSECAG00000025151	147.707	0.39951	0.270535	1.47674	0.139745	0.972041	253.082	142.206	139.963	192.903	113.53	125.917	75.8838	169.782	134.883	128.925	SCO1	protein_coding
1995	ENSECAG00000025372	20.4915	0.810817	0.545972	1.48509	0.137521	0.972041	18.6604	11.6562	24.9087	46.5236	29.8764	8.12368	7.58838	10.653	18.9505	27.9742	SNORD81	snoRNA
1996	ENSECAG00000026937	143.03	-0.356242	0.234802	-1.5172	0.129215	0.972041	99.1335	153.862	154.197	116.876	102.775	178.721	151.768	209.064	147.145	116.762	SNRNP48	protein_coding
1997	ENSECAG00000028640	140.896	0.38296	0.258501	1.48146	0.138483	0.972041	163.279	114.231	238.412	119.146	161.333	102.9	174.533	107.195	101.441	126.492	PLPP2	protein_coding
1998	ENSECAG00000034481	188.895	-0.368629	0.244139	-1.50991	0.131066	0.972041	122.459	219.137	104.379	209.924	167.308	211.216	269.387	220.383	154.948	209.807	0	protein_coding
1999	ENSECAG00000038313	1298.97	0.252282	0.166214	1.51781	0.129063	0.972041	1720.26	1298.5	1003.46	1248.2	1791.39	1229.38	1083.87	1261.71	1241.26	1111.67	0	protein_coding
[truncated: 36,850 more rows]

## Sheet: EX C vs. EX R
	gene	baseMean	log2FoldChange	lfcSE	stat	pvalue	padj	a3_j6.txt	a3_j8.txt	aj1.txt	aj2.txt	aj9.txt	z3_j10.txt	zj10.txt	zj11.txt	zj3.txt	zj4.txt	gen	type
1	ENSECAG00000009081	438.698	-1.54446	0.276252	-5.59077	2.26059e-08	0.000301879	340.606	300.987	180.461	170.444	123.304	867.129	540.219	368.851	653.913	841.064	KIAA1210	protein_coding
2	ENSECAG00000031389	2650.76	1.24063	0.254677	4.87137	1.10824e-06	0.00739974	4330.4	2950.43	5114.23	4233.92	1995.16	1022.02	1008.09	1597.21	1870.55	2385.6	CDKN1C	protein_coding
3	ENSECAG00000024127	170.523	-1.15973	0.245329	-4.72724	2.27592e-06	0.0101309	73.3872	125.2	117.994	139.566	72.146	277.288	189.318	304.503	202.773	203.054	CENPF	protein_coding
4	ENSECAG00000000658	22.7671	-2.82836	0.671835	-4.20991	2.55477e-05	0.0682327	11.7644	0.632326	1.1568	1.2351	13.1174	20.7447	50.6456	56.3044	28.7962	43.2737	GPNMB	protein_coding
5	ENSECAG00000011581	110.943	1.20007	0.282015	4.25534	2.08735e-05	0.0682327	113.722	189.065	156.168	200.086	115.434	94.0427	71.145	37.9193	56.3925	75.4516	0	protein_coding
6	ENSECAG00000007309	537.337	0.685669	0.165916	4.13263	3.5863e-05	0.0798191	603.344	679.75	697.552	807.756	523.386	321.543	396.724	488.354	435.542	419.422	FZD5	protein_coding
7	ENSECAG00000057237	23.5276	-2.32694	0.571964	-4.06833	4.73509e-05	0.0903319	4.48166	8.85256	18.5088	7.4106	0	43.5639	20.4994	35.6211	56.3925	39.945	0	lncRNA
8	ENSECAG00000029287	50.9787	1.48073	0.367855	4.02531	5.6901e-05	0.094982	56.0208	77.1437	86.7602	69.1656	86.5752	30.4256	19.2935	18.3851	51.5932	14.4246	HOPX	protein_coding
9	ENSECAG00000007607	466.096	-0.658203	0.166228	-3.95963	7.50659e-05	0.0971874	401.109	343.353	380.588	412.523	270.219	662.448	478.721	583.727	499.134	629.133	PTPRG	protein_coding
10	ENSECAG00000013053	312.773	-1.05374	0.26601	-3.96129	7.4545e-05	0.0971874	133.329	223.843	218.636	223.553	220.373	750.959	248.404	434.348	334.756	339.532	TOP2A	protein_coding
11	ENSECAG00000013597	147.566	-1.01644	0.261531	-3.88651	0.000101697	0.0971874	104.759	86.6286	107.583	137.096	52.4698	241.33	156.76	234.41	141.581	213.04	DAB2	protein_coding
12	ENSECAG00000014517	46.9982	-1.59657	0.408046	-3.91271	9.12656e-05	0.0971874	19.6073	16.4405	34.7041	19.7616	27.5466	91.9682	32.5579	110.311	37.1951	79.8899	CDCA3	protein_coding
13	ENSECAG00000018981	348.163	-0.763447	0.197794	-3.85981	0.000113475	0.0971874	247.612	292.134	247.556	180.325	321.378	298.724	501.632	471.118	445.141	476.011	ITPKA	protein_coding
14	ENSECAG00000019296	26.6693	1.77897	0.451421	3.94082	8.12037e-05	0.0971874	49.2983	27.8223	55.5265	20.9967	52.4698	8.98938	13.2643	10.3416	17.9976	9.98624	GUF1	protein_coding
15	ENSECAG00000023776	8.22077	-3.71007	0.956123	-3.88032	0.000104318	0.0971874	0.560208	0	4.62721	1.2351	0	17.2873	8.44093	14.9379	9.59873	25.5204	TTK	protein_coding
16	ENSECAG00000044783	7.27739	-3.8215	0.991697	-3.85349	0.000116444	0.0971874	0.560208	0	2.31361	1.2351	1.31174	21.4362	10.8526	14.9379	16.7978	3.32875	PCDHGA7	protein_coding
17	ENSECAG00000015806	111.532	-0.999977	0.261301	-3.82692	0.000129759	0.10193	73.3872	56.9093	72.8786	70.4007	99.6926	140.373	92.8502	189.596	128.383	190.848	CCNB1	protein_coding
18	ENSECAG00000020645	51.0889	-1.95218	0.525551	-3.71453	0.000203579	0.13593	16.246	13.9112	33.5473	41.9934	0	128.617	56.6748	91.9255	49.1935	78.7804	ASPM	protein_coding
19	ENSECAG00000044273	85.899	1.86562	0.499526	3.73478	0.000187878	0.13593	80.1097	28.4547	201.284	279.133	86.5752	62.9256	26.5286	20.6832	15.5979	57.6983	0	lncRNA
20	ENSECAG00000053584	8.41761	-4.25372	1.14348	-3.71997	0.000199246	0.13593	0	0	1.1568	3.7053	0	15.2128	12.0585	14.9379	35.9952	1.10958	0	lncRNA
21	ENSECAG00000024636	969.637	-0.521472	0.140864	-3.70195	0.000213951	0.136052	724.348	674.691	747.295	894.213	944.456	1053.83	1274.58	1031.86	1119.45	1231.64	CRISPLD2	protein_coding
22	ENSECAG00000005241	91.876	2.46274	0.668267	3.68526	0.000228467	0.138679	215.68	84.7316	209.381	234.669	32.7936	8.29789	33.7637	28.7267	10.7986	59.9175	THBD	protein_coding
23	ENSECAG00000003621	38.3303	1.56667	0.429893	3.64433	0.000268094	0.14842	57.1412	61.9679	55.5265	86.457	24.9232	15.2128	13.2643	26.4286	32.3957	9.98624	PTRH2	protein_coding
24	ENSECAG00000004544	41.9855	1.28065	0.355165	3.60579	0.000311199	0.14842	52.6595	59.4386	67.0946	39.5232	78.7047	21.4362	26.5286	36.7702	14.3981	23.3012	HRH1	protein_coding
25	ENSECAG00000009499	15.0318	-2.96044	0.817309	-3.62218	0.000292135	0.14842	10.0837	0	1.1568	1.2351	3.93523	29.0426	7.23508	19.5342	20.3973	57.6983	PIK3R2	protein_coding
26	ENSECAG00000009580	14.7088	2.4717	0.679289	3.63866	0.000274059	0.14842	29.691	7.58791	18.5088	56.8146	11.8057	2.76596	6.02923	3.44721	5.9992	4.43833	LVRN	protein_coding
27	ENSECAG00000022309	9.54563	-3.396	0.939582	-3.61437	0.000301075	0.14842	2.24083	0	0	1.2351	5.24698	17.9788	7.23508	4.59627	19.1975	37.7258	DGKQ	protein_coding
28	ENSECAG00000033482	10.411	-3.62193	1.00351	-3.60925	0.000307088	0.14842	0	0	1.1568	1.2351	6.55872	41.4894	7.23508	19.5342	3.59952	23.3012	MAF	protein_coding
29	ENSECAG00000031178	5.36352	4.55084	1.26987	3.58371	0.00033875	0.155988	12.3246	3.79395	16.1952	12.351	6.55872	0	2.41169	0	0	0	0	protein_coding
30	ENSECAG00000014019	122.161	-0.77039	0.2168	-3.55345	0.000380212	0.157221	85.7118	103.701	67.0946	88.9272	106.251	179.788	165.201	147.081	153.58	124.273	CHIC2	protein_coding
31	ENSECAG00000017667	45.8112	-1.20495	0.339636	-3.54776	0.000388519	0.157221	29.1308	17.0728	31.2337	25.9371	36.7289	85.0533	40.9988	59.7516	61.1919	71.0133	ENDOD1	protein_coding
32	ENSECAG00000034365	11.8125	-3.81636	1.0756	-3.54812	0.000387999	0.157221	6.16228	0.632326	0	0	0	29.7341	22.9111	28.7267	0	29.9587	HOXC10	protein_coding
33	ENSECAG00000055535	4.04654	-5.57284	1.56794	-3.55424	0.000379067	0.157221	0	0	0	0	0	4.14894	4.82339	0	20.3973	11.0958	0	protein_coding
34	ENSECAG00000019376	571.057	-0.9255	0.265524	-3.48556	0.000491104	0.192888	681.212	294.031	352.825	321.126	318.754	1163.09	911.62	617.05	502.733	548.134	TMEM100	protein_coding
35	ENSECAG00000010879	5.8967	-4.85919	1.40062	-3.46931	0.000521793	0.193556	0	0	1.1568	0	1.31174	40.1064	1.20585	1.14907	9.59873	4.43833	NTS	protein_coding
36	ENSECAG00000033470	175.24	-0.754999	0.217422	-3.47251	0.000515614	0.193556	113.722	137.215	144.6	113.629	142.98	179.096	214.641	312.547	163.178	230.793	0	protein_coding
37	ENSECAG00000003634	44.386	-1.34526	0.391475	-3.43639	0.000589519	0.212769	14.5654	44.8951	21.9793	25.9371	17.0527	47.0214	53.0573	65.4969	53.9928	99.8624	RHNO1	protein_coding
38	ENSECAG00000021515	413.689	0.985042	0.287521	3.42598	0.000612583	0.215275	305.313	565.299	664.005	852.219	360.73	156.277	447.369	252.795	298.76	234.122	CD22	protein_coding
39	ENSECAG00000015942	16.744	-3.03703	0.894355	-3.39577	0.000684348	0.228469	0.560208	0	2.31361	8.6457	7.87047	55.3192	57.8806	21.8323	10.7986	2.21917	TRPM6	protein_coding
40	ENSECAG00000024349	2000.33	-0.48981	0.143971	-3.40214	0.000668593	0.228469	1800.51	1618.75	1433.28	1536.46	1929.58	2084.15	2021	2554.38	2889.22	2135.95	MBNL1	protein_coding
41	ENSECAG00000050168	4.30879	5.46539	1.61318	3.38797	0.00070412	0.229337	1.12042	6.32326	8.09762	0	27.5466	0	0	0	0	0	0	lncRNA
42	ENSECAG00000013193	163.66	-1.00912	0.30151	-3.34688	0.000817255	0.259848	70.5861	94.2165	99.4851	95.1027	186.268	206.756	162.789	237.857	129.583	353.957	UHRF1	protein_coding
43	ENSECAG00000005880	9.05073	-2.79268	0.839032	-3.32845	0.000873302	0.265047	2.80104	3.16163	0	0	5.24698	21.4362	6.02923	8.04348	21.5971	22.1917	RIMKLA	protein_coding
44	ENSECAG00000011509	1259.18	0.465251	0.139675	3.33096	0.00086546	0.265047	1562.98	1406.92	1786.1	1337.61	1206.81	993.672	1023.76	1036.46	1231.04	1006.39	PSMA3	protein_coding
45	ENSECAG00000011774	200.543	0.751371	0.22686	3.31205	0.00092616	0.26511	189.35	293.399	251.026	295.189	228.244	117.553	135.055	178.106	208.772	108.739	APCDD1	protein_coding
46	ENSECAG00000012155	9.24424	-2.94861	0.890827	-3.30997	0.000933067	0.26511	0	0.632326	4.62721	4.9404	1.31174	19.3617	21.7052	14.9379	21.5971	3.32875	GAN	protein_coding
47	ENSECAG00000024979	156.306	-0.811223	0.244907	-3.31238	0.000925066	0.26511	96.9159	140.376	109.896	81.5166	139.045	233.032	196.553	227.516	115.185	223.026	ITGA5	protein_coding
48	ENSECAG00000020838	1366.06	-0.419406	0.128383	-3.26683	0.00108758	0.297604	1167.47	1064.84	1271.33	1220.28	1120.23	1296.54	1436.16	1723.6	1626.98	1733.17	USP47	protein_coding
49	ENSECAG00000060247	164.149	-1.04272	0.319296	-3.26568	0.001092	0.297604	190.471	124.568	62.4674	70.4007	85.2634	256.543	232.728	149.379	328.756	140.917	SELENOP	protein_coding
50	ENSECAG00000000324	4.88499	-4.56544	1.41506	-3.22631	0.00125397	0.33491	0	0	2.31361	0	0	17.2873	10.8526	16.087	1.19984	1.10958	RASEF	protein_coding
51	ENSECAG00000016103	12.3339	2.37859	0.738826	3.21941	0.00128454	0.336347	31.3716	24.0284	8.09762	16.0563	23.6114	2.76596	8.44093	0	1.19984	7.76708	AP4M1	protein_coding
52	ENSECAG00000001491	597.526	0.701692	0.218525	3.21104	0.00132256	0.339643	627.432	493.214	1045.75	952.262	582.415	405.905	575.189	376.894	526.73	389.463	NDN	protein_coding
53	ENSECAG00000008444	149.078	-0.682764	0.21476	-3.1792	0.00147682	0.352686	104.759	100.54	137.66	102.513	128.551	201.224	151.937	243.603	167.978	152.013	NCBP3	protein_coding
54	ENSECAG00000009752	661.382	-0.7875	0.248924	-3.16362	0.00155822	0.352686	378.14	458.436	642.026	578.027	372.536	1477.02	728.331	549.255	616.718	813.324	APOA1	protein_coding
55	ENSECAG00000017331	358.263	-0.459332	0.144783	-3.17256	0.001511	0.352686	327.721	305.413	293.828	259.371	320.066	386.543	459.428	379.193	442.741	408.326	PLEKHB2	protein_coding
56	ENSECAG00000017520	133.043	-1.24302	0.390123	-3.18622	0.00144143	0.352686	107	53.7477	57.8402	101.278	76.0812	414.894	195.347	127.547	136.782	59.9175	PLXDC2	protein_coding
57	ENSECAG00000022874	5.14864	4.48687	1.41683	3.16683	0.00154108	0.352686	1.68062	16.4405	16.1952	14.8212	0	0	0	1.14907	1.19984	0	SCG5	protein_coding
58	ENSECAG00000022971	40.9227	-1.69069	0.532963	-3.17226	0.0015126	0.352686	16.246	13.2788	4.62721	56.8146	6.55872	73.298	91.6444	56.3044	37.1951	53.26	PLXNC1	protein_coding
59	ENSECAG00000026863	67.2044	0.913843	0.288467	3.16793	0.00153527	0.352686	98.0363	73.3498	70.565	95.1027	101.004	32.5001	49.4397	52.8572	64.7914	34.3971	EFS	protein_coding
60	ENSECAG00000003452	4.51242	4.9141	1.56789	3.13422	0.00172314	0.369483	6.72249	0	1.1568	11.1159	24.9232	0	1.20585	0	0	0	PABPC5	protein_coding
61	ENSECAG00000006819	6.55179	-3.49277	1.1205	-3.11715	0.00182611	0.369483	0	0	3.47041	1.2351	1.31174	10.3724	1.20585	6.89441	14.3981	26.63	DNAJC11	protein_coding
62	ENSECAG00000007560	670.334	-0.479637	0.152659	-3.14188	0.00167868	0.369483	599.982	462.23	555.265	560.735	621.767	653.459	744.008	713.572	815.892	976.433	FXR1	protein_coding
63	ENSECAG00000009663	182.594	-0.753541	0.240877	-3.12832	0.00175809	0.369483	114.843	150.494	98.3283	122.275	194.138	173.564	195.347	191.894	284.362	300.697	CDH2	protein_coding
64	ENSECAG00000010553	4.9726	4.02467	1.28803	3.12466	0.0017801	0.369483	3.36125	1.89698	12.7248	14.8212	14.4292	1.38298	0	0	0	1.10958	NGF	protein_coding
65	ENSECAG00000012505	396.107	-0.566603	0.181224	-3.12654	0.00176878	0.369483	323.8	362.955	279.946	266.782	363.353	621.65	490.78	415.963	476.337	359.505	0	protein_coding
66	ENSECAG00000018207	54.7271	0.973764	0.312171	3.11933	0.00181264	0.369483	44.2564	89.7902	72.8786	66.6954	89.1987	33.1915	27.7345	42.5155	44.3941	36.6162	RMND1	protein_coding
67	ENSECAG00000039680	59.4782	-0.89478	0.287602	-3.11118	0.00186341	0.371403	48.7381	34.1456	47.4289	49.404	27.5466	58.7767	90.4385	82.7329	76.7898	78.7804	0	protein_coding
68	ENSECAG00000024961	5.11624	-3.96241	1.27662	-3.10382	0.0019104	0.375169	0	0	1.1568	1.2351	1.31174	25.5851	6.02923	1.14907	3.59952	11.0958	XAF1	protein_coding
69	ENSECAG00000023808	159.756	-0.681179	0.219905	-3.09761	0.00195086	0.377563	109.24	113.819	84.4466	125.98	182.333	215.745	192.935	205.683	193.174	174.204	ATAD2	protein_coding
70	ENSECAG00000016180	1115.91	-0.399523	0.12946	-3.08607	0.00202821	0.386925	1041.43	815.068	1127.88	917.679	910.351	1258.51	1342.11	1274.32	1144.65	1327.06	RAI14	protein_coding
71	ENSECAG00000006455	960.38	0.424299	0.138415	3.06542	0.00217363	0.396656	924.342	1188.14	1332.64	1014.02	1044.15	793.14	756.066	845.714	916.678	788.913	CYP51A1	protein_coding
72	ENSECAG00000007233	264.288	-0.530346	0.173457	-3.05751	0.00223184	0.396656	183.188	201.712	217.479	264.311	217.75	353.352	252.022	330.932	334.756	287.382	UBE2E3	protein_coding
73	ENSECAG00000010560	92.7581	1.48833	0.485378	3.06634	0.00216696	0.396656	38.0941	73.3498	214.009	302.6	56.405	40.7979	36.1754	73.5404	21.5971	71.0133	MIP-2BETA	protein_coding
74	ENSECAG00000014384	40.4545	-1.52872	0.500941	-3.0517	0.00227553	0.396656	19.0471	18.9698	38.1745	13.5861	14.4292	48.4043	31.352	88.4783	15.5979	116.506	AURKB	protein_coding
75	ENSECAG00000024242	233.229	0.597809	0.194898	3.06729	0.00216007	0.396656	311.475	250.401	306.553	272.957	262.349	163.883	170.024	147.081	182.376	265.19	SCARB1	protein_coding
76	ENSECAG00000025009	35.6026	-1.03927	0.34024	-3.05451	0.00225428	0.396656	18.4868	25.293	27.7633	22.2318	23.6114	65.0001	44.6163	43.6646	43.1943	42.1641	NFKBIL1	protein_coding
77	ENSECAG00000025020	176.289	0.673506	0.221507	3.04057	0.00236132	0.396656	228.004	184.007	233.674	193.911	242.673	100.958	170.024	139.037	175.177	95.4241	FHL1	protein_coding
78	ENSECAG00000057021	5.26616	4.01455	1.31901	3.04362	0.00233753	0.396656	15.1256	0	11.568	11.1159	11.8057	0.691491	1.20585	1.14907	0	0	0	lncRNA
79	ENSECAG00000057532	7.19701	4.35761	1.43161	3.04385	0.00233568	0.396656	35.8533	0	1.1568	1.2351	30.1701	0	1.20585	1.14907	1.19984	0	0	lncRNA
80	ENSECAG00000058458	699.62	-0.70475	0.231927	-3.03867	0.00237625	0.396656	373.658	525.463	564.52	566.911	632.261	925.906	754.86	504.441	737.902	1410.28	TUBB2B	protein_coding
81	ENSECAG00000000579	24.9796	1.29998	0.430249	3.02146	0.0025156	0.409675	49.8585	30.984	17.352	35.8179	43.2876	13.1383	15.676	12.6398	14.3981	16.6437	ADAMTS17	protein_coding
82	ENSECAG00000001005	12.0198	2.11574	0.700001	3.02248	0.00250716	0.409675	19.6073	20.2344	15.0384	12.351	30.1701	2.07447	0	3.44721	8.39889	8.87666	MEIOB	protein_coding
83	ENSECAG00000005925	51.2133	-1.3517	0.448181	-3.01597	0.00256159	0.411268	25.2093	27.19	12.7248	17.2914	62.9638	125.16	42.2046	59.7516	41.9944	97.6433	MYBL2	protein_coding
84	ENSECAG00000008946	9.76519	2.44226	0.81299	3.00405	0.00266414	0.411268	21.8481	8.22023	32.3905	14.8212	5.24698	3.45745	6.02923	0	1.19984	4.43833	0	protein_coding
85	ENSECAG00000012507	158.149	1.20505	0.401373	3.00231	0.00267937	0.411268	63.3035	67.0265	336.63	313.715	324.001	102.341	90.4385	79.2857	81.5892	123.164	CRYAB	protein_coding
86	ENSECAG00000036051	233.216	0.941571	0.313605	3.00241	0.0026785	0.411268	185.989	374.337	463.878	368.06	141.668	160.426	110.938	267.733	125.983	133.15	0	protein_coding
87	ENSECAG00000048111	146.074	-1.27211	0.423081	-3.00679	0.00264025	0.411268	73.3872	57.5416	90.2306	51.8742	156.098	301.49	57.8806	178.106	403.146	90.9858	0	lncRNA
88	ENSECAG00000000743	238.523	-0.478121	0.160456	-2.97976	0.00288473	0.432839	184.308	180.213	208.225	212.437	213.814	271.756	259.257	290.714	247.167	317.341	PRUNE1	protein_coding
89	ENSECAG00000015022	104.584	-0.750424	0.251775	-2.98053	0.00287752	0.432839	79.5495	85.9963	74.0354	67.9305	82.6399	179.096	124.202	136.739	137.982	77.6708	NXT2	protein_coding
90	ENSECAG00000009134	423.352	-0.516485	0.175271	-2.94679	0.00321094	0.43754	387.103	307.31	334.316	340.888	372.536	486.809	364.166	587.174	430.743	622.476	CAV1	protein_coding
91	ENSECAG00000015200	4.97393	5.06064	1.71378	2.95292	0.00314784	0.43754	0	0	15.0384	30.8775	2.62349	0	0	0	1.19984	0	0	protein_coding
92	ENSECAG00000024026	11.4416	-2.40219	0.811445	-2.96039	0.0030725	0.43754	0	9.48489	3.47041	3.7053	1.31174	35.266	13.2643	12.6398	26.3965	8.87666	SHPK	protein_coding
93	ENSECAG00000024392	12.2369	-2.49931	0.847129	-2.95032	0.00317441	0.43754	0	12.6465	1.1568	1.2351	2.62349	15.9043	8.44093	31.0249	21.5971	27.7396	BRIP1	protein_coding
94	ENSECAG00000024457	2.64891	-4.32633	1.46175	-2.95969	0.00307944	0.43754	0	0	1.1568	0	0	5.53192	3.61754	5.74534	5.9992	4.43833	SPI1	protein_coding
95	ENSECAG00000026829	532.105	0.491124	0.166403	2.95142	0.0031632	0.43754	523.794	647.501	753.079	615.08	571.921	533.831	399.135	465.373	475.137	336.204	IER3IP1	protein_coding
96	ENSECAG00000042521	6.77407	4.26936	1.44277	2.95914	0.00308497	0.43754	0	30.3516	1.1568	1.2351	31.4819	0	1.20585	0	1.19984	1.10958	0	lncRNA
97	ENSECAG00000049963	131.925	5.49247	1.86282	2.94846	0.00319357	0.43754	86.8322	10.1172	522.875	670.659	0	0.691491	0	0	19.1975	8.87666	DEFA20	protein_coding
98	ENSECAG00000059340	4.04326	-4.95086	1.67642	-2.95323	0.0031447	0.43754	0	0	1.1568	0	0	0	14.4702	11.4907	0	13.315	MNDA	protein_coding
99	ENSECAG00000002635	100.385	-0.713629	0.243443	-2.9314	0.00337439	0.44178	56.581	106.231	78.6626	72.8709	65.5872	139.681	120.585	142.484	107.986	113.177	PTGR3	protein_coding
100	ENSECAG00000016661	41.9441	-1.61225	0.549432	-2.93439	0.003342	0.44178	7.84291	10.7495	33.5473	43.2285	9.18221	38.032	22.9111	40.2174	127.183	86.5474	NR4A1	protein_coding
101	ENSECAG00000017165	384.082	-0.514395	0.175084	-2.93798	0.00330358	0.44178	261.617	310.472	380.588	286.543	344.989	483.352	401.547	387.236	401.947	582.531	ENSA	protein_coding
102	ENSECAG00000030501	3.88897	5.31432	1.81278	2.93159	0.00337237	0.44178	0	0	8.09762	11.1159	19.6762	0	0	0	0	0	DEFA11	protein_coding
103	ENSECAG00000045083	10.515	1.8506	0.634781	2.91534	0.00355303	0.460652	10.6439	13.9112	21.9793	12.351	23.6114	4.14894	2.41169	5.74534	4.79936	5.54791	0	lncRNA
104	ENSECAG00000005563	224	-0.798323	0.274601	-2.90721	0.00364664	0.466009	201.675	144.803	101.799	103.748	266.284	382.394	249.61	210.28	341.955	237.451	PRSS23	protein_coding
105	ENSECAG00000034826	97.9656	0.73302	0.252375	2.90449	0.00367855	0.466009	135.57	122.671	117.994	85.2219	150.851	91.2767	78.38	49.4099	68.3909	79.8899	BOLA1	protein_coding
106	ENSECAG00000044907	9.99158	2.91371	1.00378	2.90275	0.00369904	0.466009	1.68062	30.984	10.4112	3.7053	41.9758	5.53192	0	2.29814	0	3.32875	0	protein_coding
107	ENSECAG00000014148	24.8431	1.41975	0.490342	2.89542	0.00378651	0.47257	38.6543	26.5577	25.4497	54.3444	35.4171	8.98938	26.5286	4.59627	16.7978	11.0958	CABYR	protein_coding
108	ENSECAG00000014347	351.118	-0.540593	0.187123	-2.88897	0.00386506	0.473523	244.25	299.722	261.438	402.643	222.997	405.905	473.898	422.857	437.942	339.532	ATXN2	protein_coding
109	ENSECAG00000014813	32.278	-1.25535	0.434232	-2.89097	0.00384054	0.473523	30.2512	20.2344	13.8816	16.0563	13.1174	20.0532	40.9988	72.3913	49.1935	46.6025	CCNB2	protein_coding
110	ENSECAG00000019410	59.2678	-0.914291	0.316798	-2.88603	0.00390129	0.473616	36.4135	36.0426	41.6449	25.9371	66.899	98.1917	56.6748	87.3292	79.1895	64.3558	FXYD5	protein_coding
111	ENSECAG00000008796	83.6896	1.07076	0.371564	2.88175	0.00395468	0.475772	49.8585	77.7761	192.029	167.974	80.0164	42.8724	34.9696	75.8385	61.1919	54.3695	PPIF	protein_coding
112	ENSECAG00000017144	382.146	0.836925	0.291407	2.87201	0.00407872	0.486315	369.177	318.06	817.86	680.54	264.972	217.82	207.406	318.292	226.77	400.559	CTNNBL1	protein_coding
113	ENSECAG00000001399	114.665	-0.953778	0.332478	-2.8687	0.00412164	0.487083	120.445	60.7033	64.781	61.755	82.6399	273.83	109.732	86.1801	181.176	105.41	SAMD9	protein_coding
114	ENSECAG00000011325	5.28842	-3.97347	1.38787	-2.863	0.00419649	0.489124	0	0	1.1568	2.4702	0	23.5107	14.4702	0	2.39968	8.87666	CGNL1	protein_coding
115	ENSECAG00000056811	3.06327	-4.55935	1.59316	-2.86182	0.00421217	0.489124	0	0	1.1568	0	0	15.2128	1.20585	1.14907	10.7986	1.10958	0	lncRNA
116	ENSECAG00000009456	43.1539	-0.984862	0.346038	-2.84611	0.00442563	0.501554	29.1308	26.5577	28.9201	40.7583	19.6762	58.0852	61.4982	74.6895	31.1959	61.027	NEDD4	protein_coding
117	ENSECAG00000015929	304.08	-0.628875	0.22204	-2.83226	0.00462206	0.501554	296.35	184.007	230.204	319.891	163.968	442.554	272.521	304.503	415.145	411.655	DYNC1H1	protein_coding
118	ENSECAG00000016596	8.80182	-2.81762	0.996589	-2.82726	0.00469479	0.501554	2.80104	5.05861	1.1568	0	1.31174	31.8086	10.8526	0	8.39889	26.63	RARG	protein_coding
119	ENSECAG00000019993	4.47354	-3.79263	1.33523	-2.84044	0.00450514	0.501554	0	2.5293	0	0	0	10.3724	7.23508	11.4907	11.9984	1.10958	KALRN	protein_coding
120	ENSECAG00000020005	5.45847	3.1363	1.10727	2.83246	0.00461908	0.501554	15.1256	13.2788	1.1568	9.8808	9.18221	0	2.41169	1.14907	2.39968	0	HRC	protein_coding
121	ENSECAG00000021056	35.6876	1.01549	0.358946	2.82908	0.00466825	0.501554	44.8166	53.1154	48.5857	41.9934	51.1581	35.266	18.0877	21.8323	27.5963	14.4246	ZNF182	protein_coding
122	ENSECAG00000023322	561.441	-0.616271	0.2171	-2.83865	0.00453041	0.501554	314.276	344.617	469.662	491.57	599.467	508.937	523.338	626.242	911.879	824.42	ID3	protein_coding
123	ENSECAG00000024622	80.4132	-0.698627	0.246051	-2.83936	0.00452044	0.501554	65.5443	63.2326	68.2514	65.4603	43.2876	101.649	125.408	90.7764	83.9889	96.5337	RHOBTB3	protein_coding
124	ENSECAG00000027835	524.775	0.48726	0.172255	2.82872	0.00467346	0.501554	827.427	541.903	508.993	623.726	560.115	502.714	457.016	399.876	359.952	466.025	LRATD1	protein_coding
125	ENSECAG00000029529	5.56778	-3.57233	1.26251	-2.82955	0.00466129	0.501554	0	0	2.31361	1.2351	1.31174	8.98938	27.7345	6.89441	7.19904	0	0	lncRNA
126	ENSECAG00000016495	112.215	-0.861143	0.305664	-2.81729	0.00484311	0.511437	58.2616	112.554	69.4082	106.219	51.1581	102.341	112.144	227.516	112.785	169.766	NUSAP1	protein_coding
127	ENSECAG00000018176	78.4818	-0.848026	0.3013	-2.81455	0.0048845	0.511437	83.4709	63.8649	40.4881	25.9371	64.2755	103.032	98.8794	110.311	93.5876	100.972	PDGFRA	protein_coding
128	ENSECAG00000019120	57.0018	0.855702	0.304153	2.81339	0.00490219	0.511437	81.7903	58.8063	80.9762	86.457	59.0285	39.415	59.0865	43.6646	26.3965	34.3971	0	protein_coding
129	ENSECAG00000013781	8.33927	-3.76577	1.3449	-2.80003	0.00510973	0.521117	0	0	1.1568	2.4702	2.62349	0	51.8514	22.9814	1.19984	1.10958	CRACD	protein_coding
130	ENSECAG00000017894	34.2039	-1.14608	0.409329	-2.79989	0.00511205	0.521117	14.0052	37.3072	27.7633	17.2914	9.18221	48.4043	42.2046	55.1553	40.7946	49.9312	CKAP2	protein_coding
131	ENSECAG00000021895	985.078	-0.402876	0.143811	-2.80143	0.00508767	0.521117	831.348	1009.19	698.709	957.203	743.759	1152.71	1070.79	983.603	1151.85	1251.61	PAM	protein_coding
132	ENSECAG00000000477	108.968	-0.683512	0.245527	-2.78385	0.00537174	0.53533	93.5547	99.2751	72.8786	92.6325	59.0285	183.245	131.437	136.739	104.386	116.506	0	protein_coding
133	ENSECAG00000020210	7.20711	-2.72174	0.97713	-2.78545	0.00534538	0.53533	0.560208	0	3.47041	4.9404	1.31174	22.8192	20.4994	10.3416	4.79936	3.32875	RIC3	protein_coding
134	ENSECAG00000021699	17.2509	-2.0301	0.728324	-2.78735	0.00531403	0.53533	5.04187	17.0728	2.31361	7.4106	1.31174	44.9469	10.8526	8.04348	15.5979	59.9175	SOCS7	protein_coding
135	ENSECAG00000010991	107.472	0.646618	0.232605	2.77989	0.00543765	0.537885	128.288	106.231	111.053	161.798	148.227	65.0001	98.8794	89.6273	92.3877	73.2324	CBLL1	protein_coding
136	ENSECAG00000008445	166.691	-0.794984	0.286513	-2.77469	0.00552544	0.538589	163.02	63.8649	94.8579	176.619	111.498	192.926	184.495	156.273	201.573	321.779	MPDZ	protein_coding
137	ENSECAG00000018248	161.702	-0.859444	0.309738	-2.77474	0.00552458	0.538589	99.7169	142.906	55.5265	81.5166	195.45	273.83	241.169	174.658	227.97	124.273	LUM	protein_coding
138	ENSECAG00000020470	3.38958	5.12226	1.85167	2.76629	0.00566986	0.548662	2.80104	0	15.0384	16.0563	0	0	0	0	0	0	C2H1orf210	protein_coding
139	ENSECAG00000006002	6.55196	3.75827	1.36222	2.75894	0.00579901	0.549515	0	15.1758	1.1568	1.2351	43.2876	0	1.20585	1.14907	1.19984	1.10958	CATSPERB	protein_coding
140	ENSECAG00000006587	1241.13	0.454789	0.164645	2.76224	0.0057406	0.549515	1244.22	1418.31	1944.59	1326.5	1243.53	1130.59	848.916	1145.62	1205.84	903.2	RWDD1	protein_coding
141	ENSECAG00000009335	952.329	0.485511	0.176726	2.74725	0.00600965	0.549515	957.955	1160.95	1343.05	1122.71	969.379	616.81	786.212	618.199	1071.46	876.57	DNAJC3	protein_coding
142	ENSECAG00000019644	107.881	-0.709614	0.257239	-2.75858	0.00580534	0.549515	98.5965	68.2912	83.2898	56.8146	102.316	146.596	108.526	124.099	185.975	104.301	DNAJC28	protein_coding
143	ENSECAG00000020521	249.51	-0.506562	0.184694	-2.74271	0.00609338	0.549515	201.115	163.14	200.127	206.262	262.349	277.979	312.314	247.05	266.365	358.395	SUPT6H	protein_coding
144	ENSECAG00000032940	83.9798	0.739438	0.269014	2.7487	0.00598317	0.549515	121.005	81.57	109.896	101.278	111.498	56.7022	67.5274	62.0497	38.3949	89.8762	0	protein_coding
145	ENSECAG00000036105	43.6456	-1.13678	0.414623	-2.74173	0.00611173	0.549515	12.8848	36.0426	16.1952	37.053	35.4171	88.5108	28.9403	72.3913	47.9936	61.027	0	protein_coding
146	ENSECAG00000039158	1635.39	0.42393	0.154577	2.74251	0.00609723	0.549515	1580.35	2041.15	2212.96	1598.22	1937.45	1344.26	1389.14	1069.78	1481.8	1698.77	FDPS	protein_coding
147	ENSECAG00000050787	1590.69	0.445253	0.162461	2.74067	0.00613132	0.549515	1900.22	2409.16	1583.66	1650.09	1625.25	1385.06	1387.93	1675.34	1223.84	1066.31	HTATIP2	protein_coding
148	ENSECAG00000056328	28.0969	1.04428	0.380159	2.74694	0.00601536	0.549515	26.3298	43.6305	42.8017	40.7583	35.4171	13.8298	21.7052	17.236	20.3973	18.8629	0	lncRNA
149	ENSECAG00000060309	5.61438	-4.0185	1.45994	-2.75251	0.00591411	0.549515	0	0	1.1568	1.2351	1.31174	0	1.20585	1.14907	16.7978	33.2875	0	lncRNA
150	ENSECAG00000006686	34.2741	-1.07725	0.393728	-2.73602	0.00621863	0.549958	24.6491	21.4991	15.0384	32.1126	17.0527	67.0746	40.9988	28.7267	61.1919	34.3971	NCAPG2	protein_coding
151	ENSECAG00000020448	22.1351	-1.57544	0.575408	-2.73795	0.00618241	0.549958	12.3246	4.42628	12.7248	13.5861	13.1174	28.3511	12.0585	55.1553	10.7986	58.8079	UBE2T	protein_coding
152	ENSECAG00000004371	98.6044	0.781806	0.286911	2.7249	0.006432	0.565085	139.492	100.54	121.464	125.98	135.11	50.4788	45.8222	93.0746	116.385	57.6983	RPP38	protein_coding
153	ENSECAG00000000859	165.588	0.508418	0.187225	2.71554	0.00661673	0.567477	167.502	211.197	227.89	165.503	200.697	138.298	130.231	158.571	128.383	127.602	HEXIM1	protein_coding
154	ENSECAG00000004313	10.7293	-2.00592	0.739428	-2.7128	0.00667171	0.567477	2.80104	7.58791	9.25442	1.2351	0	9.68087	13.2643	26.4286	20.3973	16.6437	SMG7	protein_coding
155	ENSECAG00000017672	104.356	-0.691565	0.254173	-2.72084	0.00651157	0.567477	115.403	74.6144	60.1538	91.3974	55.0933	120.319	157.966	118.354	125.983	124.273	MAST4	protein_coding
156	ENSECAG00000030808	2.85838	-5.08278	1.87261	-2.71427	0.00664212	0.567477	0	0	0	0	0	11.0638	6.02923	11.4907	0	0	0	protein_coding
157	ENSECAG00000057787	4.00142	3.47604	1.27946	2.71679	0.00659175	0.567477	6.72249	9.48489	4.62721	1.2351	14.4292	0	1.20585	0	1.19984	1.10958	0	lncRNA
158	ENSECAG00000019369	15.8303	-1.92509	0.713967	-2.69633	0.00701079	0.59144	4.48166	5.05861	12.7248	11.1159	0	32.5001	6.02923	39.0683	9.59873	37.7258	CCNF	protein_coding
159	ENSECAG00000032515	30.6201	1.30572	0.484525	2.69485	0.007042	0.59144	35.2931	77.7761	27.7633	27.1722	49.8463	21.4362	20.4994	27.5776	14.3981	4.43833	CEBPA	protein_coding
160	ENSECAG00000028144	235.349	0.904284	0.336035	2.69105	0.00712285	0.593332	329.402	576.049	205.911	300.129	120.681	165.266	231.523	181.553	161.978	80.9995	TXNIP	protein_coding
161	ENSECAG00000040767	350.741	0.739331	0.274883	2.68962	0.0071534	0.593332	702.5	370.543	332.002	544.679	241.361	203.99	397.929	247.05	283.162	184.191	0	lncRNA
162	ENSECAG00000016838	122.082	-0.751059	0.279622	-2.68598	0.00723166	0.593539	123.246	91.6872	77.5058	69.1656	93.1339	252.394	130.231	162.019	111.585	109.849	CDC14A	protein_coding
163	ENSECAG00000032835	3.30752	4.45855	1.66031	2.68538	0.00724479	0.593539	0	10.1172	3.47041	1.2351	17.0527	0	0	0	1.19984	0	0	protein_coding
164	ENSECAG00000002212	321.899	-0.560607	0.209526	-2.6756	0.00745951	0.603797	256.015	270.003	217.479	245.785	312.195	455.692	467.869	219.472	353.953	420.532	FOXO1	protein_coding
165	ENSECAG00000046786	3.91573	-4.18016	1.56235	-2.67556	0.00746043	0.603797	0	0	0	0	2.62349	0	14.4702	2.29814	11.9984	7.76708	0	protein_coding
166	ENSECAG00000000557	52.8717	0.827713	0.309777	2.67197	0.00754082	0.606628	80.6699	71.4528	45.1153	67.9305	72.146	35.266	53.0573	28.7267	44.3941	29.9587	RPUSD4	protein_coding
167	ENSECAG00000034095	24.8101	-1.23482	0.463438	-2.66447	0.00771086	0.616592	8.96332	13.2788	25.4497	13.5861	13.1174	17.9788	40.9988	26.4286	52.793	35.5066	FAM133A	protein_coding
168	ENSECAG00000011564	60.7261	-0.885283	0.333143	-2.65736	0.00787547	0.620288	40.3349	46.1598	45.1153	61.755	19.6762	82.9789	104.909	45.9627	81.5892	78.7804	DLG1	protein_coding
169	ENSECAG00000013362	40.3589	1.2062	0.453814	2.65791	0.00786272	0.620288	33.0522	27.8223	63.6242	112.394	44.5993	11.7553	33.7637	26.4286	32.3957	17.7533	CRYM	protein_coding
170	ENSECAG00000025048	145.647	-0.597662	0.224984	-2.65647	0.00789643	0.620288	116.523	114.451	106.426	135.861	107.563	237.873	112.144	167.764	184.775	173.095	SKIC3	protein_coding
171	ENSECAG00000011251	23.4172	1.17733	0.444108	2.65099	0.00802558	0.623103	24.0889	39.2042	21.9793	25.9371	51.1581	12.4468	14.4702	20.6832	11.9984	12.2054	PARP16	protein_coding
172	ENSECAG00000054832	4.29238	3.86546	1.4572	2.65266	0.00798597	0.623103	16.8062	10.1172	1.1568	12.351	0	1.38298	0	0	0	1.10958	0	lncRNA
173	ENSECAG00000009270	150.818	-0.787042	0.29753	-2.64525	0.00816303	0.629049	170.303	58.8063	89.0738	106.219	128.551	168.724	188.112	225.217	107.986	265.19	ORC2	protein_coding
174	ENSECAG00000012598	4.04676	-3.55502	1.34463	-2.64387	0.00819639	0.629049	0	0	1.1568	2.4702	0	4.84043	3.61754	16.087	1.19984	11.0958	MRTO4	protein_coding
175	ENSECAG00000007441	3.99315	-4.21917	1.60015	-2.63673	0.0083709	0.63515	0	0	2.31361	0	0	0	4.82339	16.087	15.5979	1.10958	IKZF3	protein_coding
176	ENSECAG00000015984	82.8588	-1.0825	0.410791	-2.63517	0.00840957	0.63515	49.2983	60.0709	39.3313	53.1093	64.2755	168.032	174.848	122.95	75.59	21.0821	WIPF1	protein_coding
177	ENSECAG00000052769	16.1657	1.43925	0.546247	2.6348	0.00841857	0.63515	17.9266	32.2486	27.7633	18.5265	20.9879	3.45745	14.4702	11.4907	4.79936	9.98624	SPACDR	protein_coding
178	ENSECAG00000019036	6.43478	-3.77779	1.43592	-2.63092	0.00851553	0.638856	0	0	3.47041	0	1.31174	11.0638	0	22.9814	0	25.5204	MMP16	protein_coding
179	ENSECAG00000015422	134.228	0.528048	0.200938	2.62792	0.00859099	0.640917	150.696	160.611	157.325	135.861	188.891	121.011	127.82	105.714	105.586	88.7666	CRBN	protein_coding
180	ENSECAG00000010375	301.225	0.458208	0.174867	2.62032	0.00878476	0.648377	341.166	257.357	426.86	382.881	335.807	217.82	256.845	276.926	259.166	257.423	SRPK2	protein_coding
181	ENSECAG00000023076	13.0299	-1.60307	0.611816	-2.62019	0.00878809	0.648377	6.16228	9.48489	4.62721	4.9404	6.55872	12.4468	14.4702	42.5155	17.9976	11.0958	GPCPD1	protein_coding
182	ENSECAG00000011078	35.5853	1.09376	0.418924	2.61089	0.00903075	0.658998	52.0993	34.7779	70.565	58.0497	26.2349	15.2128	37.3813	24.1304	25.1967	12.2054	TGIF1	protein_coding
183	ENSECAG00000018069	232.827	-0.598095	0.228916	-2.61273	0.00898217	0.658998	241.449	171.36	160.796	214.907	135.11	205.373	302.668	213.727	389.948	292.93	ARAP2	protein_coding
184	ENSECAG00000023331	113.806	-0.675435	0.260053	-2.5973	0.00939601	0.680474	76.7484	82.8347	109.896	83.9868	86.5752	206.064	106.115	144.783	151.18	89.8762	KIF20B	protein_coding
185	ENSECAG00000051073	2.40972	4.62639	1.78313	2.59453	0.0094721	0.680474	2.80104	3.16163	0	3.7053	14.4292	0	0	0	0	0	0	protein_coding
186	ENSECAG00000057964	4.09216	-4.25075	1.63848	-2.59432	0.00947791	0.680474	0	0	1.1568	1.2351	0	0	3.61754	0	21.5971	13.315	0	protein_coding
187	ENSECAG00000011008	3.65435	4.59558	1.77441	2.58992	0.00959972	0.685533	0	0	8.09762	4.9404	22.2997	0	1.20585	0	0	0	MCOLN2	protein_coding
188	ENSECAG00000010897	3.24805	-4.66715	1.80426	-2.58675	0.00968872	0.688208	0.560208	0	0	0	0	15.2128	0	0	15.5979	1.10958	ETS1	protein_coding
189	ENSECAG00000052782	8.71685	2.05668	0.796696	2.58151	0.00983681	0.695031	11.7644	15.8081	8.09762	20.9967	13.1174	0.691491	7.23508	1.14907	7.19904	1.10958	0	lncRNA
190	ENSECAG00000008738	113.541	-0.696744	0.270468	-2.57607	0.00999309	0.702356	62.183	92.3195	105.269	111.159	62.9638	123.085	98.8794	114.907	171.577	193.067	ID2	protein_coding
191	ENSECAG00000024661	295.143	-0.415125	0.161469	-2.57092	0.0101429	0.709151	230.245	219.417	266.065	245.785	306.948	369.947	323.167	297.609	322.757	369.491	ILKAP	protein_coding
192	ENSECAG00000014124	88.5166	0.736874	0.287359	2.5643	0.0103384	0.719058	99.7169	84.0993	163.109	124.745	81.3282	46.3299	61.4982	95.3727	62.3917	66.575	GNE	protein_coding
193	ENSECAG00000010610	9804.25	1.32432	0.516893	2.56208	0.0104048	0.719928	8212.64	5113.62	24213	26618.9	5905.48	3608.2	5501.07	4996.15	5918.81	7954.6	HSP90B1	protein_coding
194	ENSECAG00000014059	39.374	-1.13226	0.442326	-2.55978	0.0104739	0.720968	37.5339	11.3819	32.3905	23.4669	18.3644	44.9469	36.1754	58.6025	28.7962	102.082	ECT2	protein_coding
195	ENSECAG00000008085	4.93156	3.77345	1.47538	2.5576	0.0105397	0.721778	0	15.1758	5.78402	1.2351	23.6114	0	0	0	2.39968	1.10958	OTOA	protein_coding
196	ENSECAG00000001652	990.328	-0.467795	0.190225	-2.45917	0.0139257	0.729668	692.417	811.906	934.697	1079.48	640.132	1489.47	826.005	1343.26	1060.66	1025.25	ITGA6	protein_coding
197	ENSECAG00000005229	1568.6	0.373283	0.150787	2.47557	0.0133024	0.729668	1533.29	2127.78	2070.68	1659.97	1458.66	1230.85	1161.23	1528.26	1421.81	1493.5	ARF4	protein_coding
198	ENSECAG00000007464	193.125	-0.794202	0.321434	-2.47081	0.0134806	0.729668	78.9893	139.112	168.893	132.156	188.891	217.128	121.791	374.596	137.982	371.71	RRM2	protein_coding
199	ENSECAG00000007612	19.8104	-1.05692	0.42218	-2.50349	0.0122976	0.729668	11.7644	13.2788	12.7248	12.351	14.4292	29.7341	30.1462	27.5776	22.797	23.3012	PPP1R1A	protein_coding
200	ENSECAG00000007747	834.495	0.375658	0.152543	2.46265	0.0137916	0.729668	717.066	1005.4	1039.97	899.153	1053.33	771.012	847.71	720.466	683.909	606.942	OPTN	protein_coding
201	ENSECAG00000008622	7.77699	1.86406	0.756965	2.46255	0.0137953	0.729668	12.8848	10.1172	15.0384	12.351	10.494	2.76596	8.44093	1.14907	1.19984	3.32875	SEMA4A	protein_coding
202	ENSECAG00000008726	10.6391	-2.92859	1.16357	-2.5169	0.0118391	0.729668	1.68062	0	0	11.1159	0	16.5958	6.02923	31.0249	0	39.945	NPY	protein_coding
203	ENSECAG00000008935	189.988	0.500304	0.200285	2.49796	0.0124909	0.729668	225.203	237.754	229.047	243.315	175.774	131.383	185.7	143.634	201.573	126.492	ERO1B	protein_coding
204	ENSECAG00000009262	189.528	1.9277	0.761	2.53311	0.0113056	0.729668	85.7118	118.245	461.564	610.139	225.62	94.0427	13.2643	86.1801	25.1967	175.314	PTGDS	protein_coding
205	ENSECAG00000009621	85.0368	-0.700809	0.280425	-2.49909	0.0124511	0.729668	36.4135	70.1882	50.8993	79.0464	89.1987	98.1917	92.8502	96.5218	112.785	124.273	INCENP	protein_coding
206	ENSECAG00000009835	14.3203	1.83111	0.723607	2.53053	0.011389	0.729668	23.5287	5.69093	25.4497	14.8212	41.9758	2.07447	15.676	1.14907	8.39889	4.43833	BTBD11	protein_coding
207	ENSECAG00000010515	21.2389	-1.30423	0.519813	-2.50904	0.0121061	0.729668	6.72249	12.6465	4.62721	18.5265	19.6762	37.3405	13.2643	31.0249	26.3965	42.1641	CAND2	protein_coding
208	ENSECAG00000010597	150.958	0.534021	0.217322	2.45728	0.0139994	0.729668	214.559	165.669	153.855	179.09	178.397	101.649	94.0561	171.211	122.384	128.712	TRIT1	protein_coding
209	ENSECAG00000011380	58.3374	-0.897418	0.364288	-2.46348	0.0137594	0.729668	25.7695	59.4386	26.6065	67.9305	23.6114	56.0107	80.7917	59.7516	93.5876	89.8762	TACC3	protein_coding
210	ENSECAG00000011414	467	0.716984	0.286136	2.50575	0.0122193	0.729668	296.91	295.928	964.774	644.722	703.095	299.415	367.783	252.795	400.747	443.833	DAB1	protein_coding
211	ENSECAG00000011501	14.4817	-1.2915	0.525864	-2.45596	0.0140511	0.729668	6.72249	8.22023	4.62721	11.1159	11.8057	22.1277	13.2643	17.236	26.3965	23.3012	ZNF215	protein_coding
212	ENSECAG00000011754	78.499	0.8157	0.328914	2.47998	0.0131391	0.729668	112.042	80.9377	121.464	97.5729	87.8869	39.415	45.8222	111.46	53.9928	34.3971	RPIA	protein_coding
213	ENSECAG00000011807	50.7815	0.897995	0.357605	2.51113	0.0120344	0.729668	53.7799	74.6144	71.7218	67.9305	61.652	20.7447	26.5286	64.3478	43.1943	23.3012	RAF1	protein_coding
214	ENSECAG00000011818	139.55	0.479838	0.189869	2.52721	0.0114974	0.729668	143.413	155.552	190.873	167.974	156.098	119.628	120.585	126.398	99.5868	115.397	BCKDK	protein_coding
215	ENSECAG00000012086	42.3036	-0.948218	0.38512	-2.46214	0.0138111	0.729668	38.0941	24.0284	19.6657	23.4669	39.3523	77.4469	55.469	43.6646	26.3965	75.4516	NECAB3	protein_coding
216	ENSECAG00000012452	122.991	0.514266	0.209329	2.45674	0.0140204	0.729668	143.973	114.451	170.05	134.626	161.345	99.5746	94.0561	121.801	92.3877	97.6433	ATG12	protein_coding
217	ENSECAG00000012746	171.123	0.512065	0.201574	2.54033	0.0110748	0.729668	184.868	188.433	267.222	174.149	191.515	128.617	113.35	158.571	139.182	165.328	STAR	protein_coding
218	ENSECAG00000013188	28.5177	-1.24203	0.497751	-2.49528	0.0125859	0.729668	12.3246	15.8081	18.5088	24.702	14.4292	78.1384	15.676	57.4534	20.3973	27.7396	CDCA2	protein_coding
219	ENSECAG00000013218	3.47901	-4.02536	1.58294	-2.54297	0.0109916	0.729668	0	0	0	2.4702	0	15.9043	4.82339	9.19255	2.39968	0	CEL	protein_coding
220	ENSECAG00000013409	65.4286	0.803935	0.317389	2.53297	0.0113102	0.729668	78.4291	77.7761	97.1715	113.629	48.5346	33.883	33.7637	65.4969	46.7938	58.8079	STK26	protein_coding
221	ENSECAG00000013965	28.2977	1.26079	0.50292	2.50693	0.0121785	0.729668	37.5339	18.3374	46.2721	38.2881	59.0285	6.91491	6.02923	18.3851	29.996	22.1917	SLC6A8	protein_coding
222	ENSECAG00000014247	125.86	-0.706685	0.2824	-2.50242	0.0123346	0.729668	89.6332	100.54	115.68	93.8676	80.0164	282.128	113.35	135.59	107.986	139.807	TINAGL1	protein_coding
223	ENSECAG00000016216	408.793	-0.40333	0.163369	-2.46883	0.0135554	0.729668	369.177	343.353	382.902	339.653	325.313	503.405	406.37	388.385	423.544	605.832	ITCH	protein_coding
224	ENSECAG00000016800	2.53287	-4.26587	1.68962	-2.52475	0.011578	0.729668	0	0	0	1.2351	0	11.0638	2.41169	0	8.39889	2.21917	PRRC2C	protein_coding
225	ENSECAG00000016856	7.56527	3.33205	1.33415	2.49751	0.0125069	0.729668	0	38.5719	0	2.4702	27.5466	0	1.20585	1.14907	3.59952	1.10958	SLC7A2	protein_coding
226	ENSECAG00000017337	94.8829	0.673605	0.273601	2.462	0.0138165	0.729668	138.931	89.1579	130.719	97.5729	127.239	84.3618	50.6456	66.646	109.186	54.3695	PDE6B	protein_coding
227	ENSECAG00000017851	2.8194	4.85871	1.97929	2.45478	0.0140972	0.729668	7.2827	0	0	1.2351	19.6762	0	0	0	0	0	0	protein_coding
228	ENSECAG00000018002	25.2353	1.97028	0.800432	2.46153	0.0138347	0.729668	5.60208	5.05861	57.8402	107.454	24.9232	2.76596	21.7052	1.14907	19.1975	6.6575	FOSB	protein_coding
229	ENSECAG00000018636	6.69884	-2.48271	0.991087	-2.50504	0.0122439	0.729668	5.04187	0	1.1568	2.4702	1.31174	25.5851	9.64677	14.9379	2.39968	4.43833	CCDC77	protein_coding
230	ENSECAG00000019027	16.0361	-1.70305	0.677001	-2.51559	0.0118834	0.729668	3.36125	0.632326	9.25442	8.6457	17.0527	11.7553	15.676	27.5776	41.9944	24.4108	ADAM22	protein_coding
231	ENSECAG00000019246	541.654	-0.627724	0.254697	-2.46459	0.013717	0.729668	351.25	580.475	350.511	276.662	569.297	785.533	545.043	340.124	824.291	793.352	AP1B1	protein_coding
232	ENSECAG00000019355	216.883	-0.447956	0.175883	-2.5469	0.0108686	0.729668	202.235	141.641	180.461	208.732	184.956	230.266	272.521	225.217	253.166	269.629	ZEB2	protein_coding
233	ENSECAG00000020055	1183.71	-0.362583	0.142504	-2.54436	0.0109478	0.729668	1048.71	1006.03	925.442	920.15	1278.95	1248.83	1170.88	1350.16	1279.03	1608.89	PFKP	protein_coding
234	ENSECAG00000020506	246.988	-0.551555	0.221745	-2.48733	0.0128704	0.729668	127.167	266.209	172.364	201.321	236.114	345.745	218.258	330.932	269.964	301.806	MCM3	protein_coding
235	ENSECAG00000022913	1818.94	0.317096	0.128471	2.46824	0.0135781	0.729668	2053.72	1847.66	2310.14	2086.08	1793.16	1578.67	1494.04	1584.57	1497.4	1943.99	SARAF	protein_coding
236	ENSECAG00000023826	766.6	0.479074	0.194903	2.45801	0.0139709	0.729668	612.307	636.752	1186.88	1152.35	878.869	665.214	623.423	576.832	688.709	644.667	ZFAND5	protein_coding
237	ENSECAG00000024047	60.2354	0.887205	0.352532	2.51666	0.0118472	0.729668	53.2197	39.8365	78.6626	108.689	111.498	31.8086	42.2046	33.323	43.1943	59.9175	IL6R	protein_coding
238	ENSECAG00000024359	3.7806	-3.1575	1.28556	-2.45612	0.0140446	0.729668	1.68062	0.632326	1.1568	0	0	8.29789	9.64677	9.19255	7.19904	0	SLC45A2	protein_coding
239	ENSECAG00000024430	114.473	-0.666794	0.262534	-2.53984	0.0110903	0.729668	99.7169	82.2023	76.349	104.984	80.0164	206.756	119.379	85.0311	127.183	163.109	0	protein_coding
240	ENSECAG00000024520	374.544	0.497372	0.201167	2.47244	0.0134195	0.729668	486.26	305.413	533.286	485.394	381.718	265.532	309.903	388.385	358.752	230.793	KDELR3	protein_coding
241	ENSECAG00000024558	95.0486	-0.595579	0.239396	-2.48784	0.0128523	0.729668	92.9945	73.3498	64.781	79.0464	66.899	104.415	98.8794	156.273	113.985	99.8624	0	protein_coding
242	ENSECAG00000025273	2.73681	-3.6515	1.47006	-2.48391	0.0129949	0.729668	0	0	1.1568	1.2351	0	4.84043	12.0585	1.14907	3.59952	3.32875	U2	snRNA
243	ENSECAG00000026862	291.019	0.578972	0.228111	2.53812	0.011145	0.729668	283.465	313.634	478.916	368.06	299.078	201.915	303.873	226.367	293.961	140.917	GCSH	protein_coding
244	ENSECAG00000031635	7.0878	-3.29816	1.32317	-2.49263	0.0126802	0.729668	3.36125	2.5293	0	0	0	22.1277	0	0	23.9968	18.8629	0	protein_coding
245	ENSECAG00000032770	2.46548	-4.20349	1.70285	-2.4685	0.013568	0.729668	0	0	1.1568	0	0	0	10.8526	2.29814	4.79936	5.54791	0	lncRNA
246	ENSECAG00000033960	12.9224	-2.48691	1.00505	-2.4744	0.0133459	0.729668	11.2042	5.05861	1.1568	0	1.31174	69.8405	19.2935	8.04348	0	13.315	GALNT16	protein_coding
247	ENSECAG00000039591	14.7317	-3.81618	1.53533	-2.48557	0.0129345	0.729668	0	0	1.1568	1.2351	7.87047	45.6384	84.4093	2.29814	3.59952	1.10958	ZNF469	protein_coding
248	ENSECAG00000045231	21.3723	-1.33883	0.536697	-2.49457	0.0126111	0.729668	5.04187	13.2788	6.94082	12.351	23.6114	12.4468	34.9696	32.1739	25.1967	47.7121	CHEK1	protein_coding
249	ENSECAG00000045676	25.9439	-1.30204	0.521159	-2.49836	0.0124768	0.729668	17.9266	6.32326	19.6657	25.9371	5.24698	33.883	25.3228	36.7702	68.3909	19.9725	0	lncRNA
250	ENSECAG00000046052	6.25947	-1.96225	0.785019	-2.49962	0.0124326	0.729668	2.80104	2.5293	1.1568	4.9404	1.31174	10.3724	9.64677	10.3416	8.39889	11.0958	0	lncRNA
251	ENSECAG00000047193	4.51328	-3.37315	1.34073	-2.5159	0.0118728	0.729668	0.560208	0	0	1.2351	2.62349	23.5107	3.61754	0	3.59952	9.98624	0	lncRNA
252	ENSECAG00000047924	4.07173	3.51327	1.39352	2.52115	0.0116973	0.729668	6.72249	20.2344	1.1568	1.2351	7.87047	0	0	2.29814	1.19984	0	0	lncRNA
253	ENSECAG00000048863	2.96084	-4.47473	1.78913	-2.50106	0.0123822	0.729668	0	0	0	0	1.31174	0	8.44093	0	13.1982	6.6575	0	lncRNA
254	ENSECAG00000052553	3.61239	4.60592	1.82	2.53073	0.0113826	0.729668	0	0.632326	15.0384	19.7616	0	0.691491	0	0	0	0	0	lncRNA
255	ENSECAG00000052776	5.51151	-3.48291	1.40104	-2.48595	0.0129205	0.729668	0	0	0	3.7053	1.31174	0	18.0877	1.14907	11.9984	18.8629	0	lncRNA
256	ENSECAG00000053180	2.96164	-4.47876	1.78506	-2.50903	0.0121062	0.729668	0	0	0	1.2351	0	0	8.44093	10.3416	9.59873	0	0	lncRNA
257	ENSECAG00000054575	10.5503	-2.55691	1.0325	-2.47643	0.0132702	0.729668	0	0	1.1568	11.1159	3.93523	19.3617	19.2935	1.14907	38.3949	11.0958	0	protein_coding
258	ENSECAG00000055533	6.39489	-2.42115	0.979746	-2.47121	0.0134658	0.729668	0	0	4.62721	3.7053	2.62349	12.4468	4.82339	14.9379	10.7986	9.98624	0	lncRNA
259	ENSECAG00000009125	4.38022	3.59942	1.46764	2.45252	0.0141858	0.731416	19.6073	0	1.1568	2.4702	17.0527	0	1.20585	0	1.19984	1.10958	UPK3A	protein_coding
260	ENSECAG00000027676	1927.79	-0.498344	0.20332	-2.45103	0.0142446	0.731626	1532.73	1684.52	1410.14	1089.36	2274.57	2305.43	1509.72	2086.71	2344.49	3040.26	0	Mt_rRNA
261	ENSECAG00000003000	3.40792	-4.70345	1.92678	-2.44109	0.0146431	0.732568	0	0	0	1.2351	0	12.4468	0	0	20.3973	0	0	protein_coding
262	ENSECAG00000010522	3.64295	3.94029	1.61578	2.43864	0.0147428	0.732568	10.6439	0	1.1568	1.2351	20.9879	0	1.20585	0	1.19984	0	BACH2	protein_coding
263	ENSECAG00000012230	37.9785	-1.17788	0.481392	-2.44683	0.014412	0.732568	10.0837	26.5577	23.1361	40.7583	17.0527	89.2023	31.352	43.6646	19.1975	78.7804	KAT6B	protein_coding
264	ENSECAG00000012497	115.832	0.598114	0.244588	2.44539	0.0144694	0.732568	156.858	151.126	151.541	116.099	121.992	111.33	94.0561	113.758	52.793	88.7666	LIMK1	protein_coding
265	ENSECAG00000014940	78.4915	-0.712695	0.292507	-2.43651	0.0148299	0.732568	45.937	84.7316	75.1922	37.053	53.7815	93.3512	95.2619	90.7764	76.7898	132.04	RBM22	protein_coding
266	ENSECAG00000021685	25.8093	1.12072	0.457934	2.44734	0.0143914	0.732568	52.6595	27.8223	32.3905	41.9934	20.9879	10.3724	25.3228	10.3416	23.9968	12.2054	DCLRE1B	protein_coding
267	ENSECAG00000022453	2.82339	4.23529	1.73649	2.43899	0.0147282	0.732568	0.560208	1.89698	0	18.5265	6.55872	0.691491	0	0	0	0	0	protein_coding
268	ENSECAG00000024783	100.731	0.591737	0.2426	2.43915	0.0147219	0.732568	115.963	115.083	135.346	96.3378	142.98	82.2874	95.2619	70.0932	99.5868	54.3695	KIAA1143	protein_coding
269	ENSECAG00000029061	125.037	-0.682356	0.280087	-2.43623	0.0148412	0.732568	88.5128	58.8063	117.994	104.984	111.498	143.139	182.083	219.472	85.1887	138.698	DMRTA2	protein_coding
270	ENSECAG00000049130	3.02933	-5.15464	2.10981	-2.44318	0.0145586	0.732568	0	0	0	0	0	0	0	0	19.1975	11.0958	0	lncRNA
271	ENSECAG00000057389	27.0725	1.02114	0.419253	2.43562	0.0148664	0.732568	28.0104	40.4688	52.0561	23.4669	36.7289	10.3724	21.7052	18.3851	23.9968	15.5342	0	lncRNA
272	ENSECAG00000001318	195.07	-0.438206	0.1804	-2.42908	0.0151371	0.737549	180.387	153.023	161.952	184.03	148.227	202.607	248.404	244.752	178.776	248.546	UBL3	protein_coding
273	ENSECAG00000009060	320.74	0.659797	0.271461	2.43054	0.0150764	0.737549	314.837	304.149	539.07	578.027	228.244	175.639	163.995	314.845	272.364	316.231	DIPK2A	protein_coding
274	ENSECAG00000011727	28.6904	-1.20775	0.497644	-2.42694	0.0152269	0.737549	28.0104	6.95558	13.8816	17.2914	20.9879	79.5214	38.5871	18.3851	29.996	33.2875	RNASE4	protein_coding
275	ENSECAG00000014646	2.395	-4.81519	1.98421	-2.42676	0.0152345	0.737549	0	0	0	0	0	0	0	5.74534	5.9992	12.2054	KNG1	protein_coding
276	ENSECAG00000017586	159.85	-0.529097	0.218046	-2.42654	0.0152436	0.737549	137.251	173.257	101.799	100.043	140.357	220.585	215.847	158.571	164.378	186.41	SUPT3H	protein_coding
277	ENSECAG00000023046	35.7085	-1.05659	0.436306	-2.42167	0.0154496	0.744814	23.5287	5.69093	32.3905	29.6424	26.2349	67.7661	42.2046	40.2174	52.793	36.6162	SORCS1	protein_coding
278	ENSECAG00000018332	17.5132	1.3644	0.565897	2.41105	0.0159067	0.761354	34.1727	19.6021	19.6657	24.702	27.5466	6.91491	16.8819	14.9379	9.59873	1.10958	AK4	protein_coding
279	ENSECAG00000019492	2.85084	-3.73569	1.54939	-2.41107	0.0159058	0.761354	0	0	1.1568	1.2351	0	15.9043	1.20585	1.14907	1.19984	6.6575	MGAT5	protein_coding
280	ENSECAG00000051185	7.75111	-2.26627	0.940559	-2.4095	0.0159745	0.761871	7.84291	0	1.1568	1.2351	2.62349	20.7447	15.676	4.59627	19.1975	4.43833	0	lncRNA
281	ENSECAG00000006078	206.665	-0.478129	0.198913	-2.40371	0.0162297	0.765834	164.141	138.479	173.52	203.792	184.956	197.766	188.112	294.162	283.162	238.56	AGO2	protein_coding
282	ENSECAG00000009033	943.751	-0.3722	0.1548	-2.40439	0.0161996	0.765834	915.939	882.727	747.295	787.994	777.865	1136.12	1070.79	822.733	933.476	1362.57	AP2B1	protein_coding
283	ENSECAG00000055060	2.76536	4.21542	1.75333	2.40424	0.0162063	0.765834	0	18.9698	2.31361	1.2351	3.93523	0	0	0	1.19984	0	0	protein_coding
284	ENSECAG00000057513	882.731	0.478447	0.199224	2.40155	0.0163257	0.767653	816.222	1093.92	1370.81	1054.78	802.788	595.373	648.746	1073.23	604.72	766.722	0	protein_coding
285	ENSECAG00000048310	5.62464	-3.00645	1.25263	-2.40012	0.0163898	0.76796	0	0.632326	1.1568	4.9404	0	33.1915	4.82339	9.19255	1.19984	1.10958	0	lncRNA
286	ENSECAG00000008466	70.8297	-0.714053	0.298131	-2.3951	0.016616	0.77045	41.4554	50.5861	58.997	54.3444	64.2755	89.8938	61.4982	90.7764	59.992	136.479	BIRC5	protein_coding
287	ENSECAG00000011333	210.525	0.542598	0.226428	2.39634	0.0165599	0.77045	174.785	287.076	251.026	259.371	276.778	171.49	239.964	178.106	107.986	158.67	RXYLT1	protein_coding
288	ENSECAG00000019795	502.282	-0.431451	0.179983	-2.39718	0.016522	0.77045	476.176	431.246	371.334	359.414	499.775	626.49	625.835	420.559	727.103	484.888	ARID5B	protein_coding
289	ENSECAG00000013071	24.781	1.08468	0.453932	2.38951	0.0168707	0.776868	29.1308	25.293	26.6065	29.6424	57.7168	8.98938	15.676	17.236	11.9984	25.5204	ZNF740	protein_coding
290	ENSECAG00000050771	2.66407	-3.61575	1.51278	-2.39014	0.0168419	0.776868	0	0	0	1.2351	1.31174	10.3724	1.20585	1.14907	3.59952	7.76708	0	lncRNA
291	ENSECAG00000000064	450.945	0.421044	0.17891	2.35338	0.0186037	0.778751	367.496	585.534	655.907	487.865	486.657	439.788	327.99	411.367	399.547	347.299	ELOC	protein_coding
292	ENSECAG00000000097	4.40625	2.75422	1.17589	2.34224	0.0191684	0.778751	2.24083	7.58791	4.62721	19.7616	3.93523	0	2.41169	2.29814	1.19984	0	0	protein_coding
293	ENSECAG00000000133	15.1901	-1.27048	0.539375	-2.35547	0.0184993	0.778751	5.60208	5.05861	8.09762	8.6457	18.3644	23.5107	19.2935	27.5776	17.9976	17.7533	TMEM59L	protein_coding
294	ENSECAG00000002113	22.0398	-1.26819	0.542683	-2.33688	0.0194453	0.778751	6.16228	11.3819	10.4112	19.7616	18.3644	62.9256	16.8819	37.9193	14.3981	22.1917	BARD1	protein_coding
295	ENSECAG00000002211	43.3835	-0.857462	0.366162	-2.34176	0.0191933	0.778751	31.9318	18.3374	27.7633	25.9371	51.1581	44.9469	85.6151	45.9627	45.5939	56.5887	CD80	protein_coding
296	ENSECAG00000002992	227.297	0.443871	0.187345	2.36927	0.0178233	0.778751	216.24	279.488	274.162	216.143	324.001	172.181	190.524	204.534	230.369	165.328	MID1IP1	protein_coding
297	ENSECAG00000004144	2.49728	-4.22893	1.79597	-2.35467	0.018539	0.778751	0	0	1.1568	0	0	0	4.82339	1.14907	1.19984	16.6437	FOXB1	protein_coding
298	ENSECAG00000005001	3.36587	3.82295	1.60504	2.38184	0.0172264	0.778751	0	12.0142	2.31361	1.2351	15.7409	0	1.20585	1.14907	0	0	EYS	protein_coding
299	ENSECAG00000007602	173.872	0.556033	0.235312	2.36296	0.0181298	0.778751	224.643	170.728	171.207	190.205	276.778	84.3618	150.731	145.932	178.776	145.355	LTV1	protein_coding
300	ENSECAG00000008131	76.4683	-0.644351	0.272042	-2.36857	0.0178571	0.778751	85.1515	42.9981	46.2721	69.1656	53.7815	87.1278	109.732	82.7329	91.1879	96.5337	ITPR2	protein_coding
301	ENSECAG00000008472	2.65845	-4.31807	1.83917	-2.34784	0.0188827	0.778751	0	0	0	1.2351	0	0	7.23508	0	4.79936	13.315	ZNF821	protein_coding
302	ENSECAG00000009086	10.9584	1.89609	0.811095	2.33769	0.0194035	0.778751	18.4868	3.79395	6.94082	7.4106	49.8463	3.45745	4.82339	1.14907	4.79936	8.87666	BEND7	protein_coding
303	ENSECAG00000009468	2.712	-4.35052	1.85085	-2.35056	0.0187454	0.778751	0	0	1.1568	0	0	0	3.61754	0	16.7978	5.54791	ABCA12	protein_coding
304	ENSECAG00000009971	99.7049	0.599287	0.256124	2.33983	0.0192925	0.778751	138.931	115.716	114.524	158.093	72.146	69.1491	94.0561	86.1801	82.789	65.4654	AJUBA	protein_coding
305	ENSECAG00000009997	14.8181	1.45196	0.614227	2.36387	0.0180849	0.778751	26.3298	20.8667	34.7041	16.0563	10.494	7.6064	2.41169	17.236	3.59952	8.87666	KLHDC2	protein_coding
306	ENSECAG00000010198	110.872	-0.516736	0.218948	-2.36009	0.0182706	0.778751	100.837	72.0851	107.583	104.984	70.8342	127.234	119.379	137.888	139.182	128.712	PITPNB	protein_coding
307	ENSECAG00000011006	24.2322	-1.25294	0.529723	-2.36528	0.0180163	0.778751	7.2827	12.0142	25.4497	16.0563	11.8057	45.6384	12.0585	58.6025	16.7978	36.6162	TGFA	protein_coding
308	ENSECAG00000012118	20.7683	-1.31535	0.563554	-2.33403	0.0195942	0.778751	4.48166	22.1314	13.8816	12.351	6.55872	34.5745	9.64677	24.1304	29.996	49.9312	ARNTL	protein_coding
309	ENSECAG00000014120	3.84212	-3.15007	1.32735	-2.37321	0.0176344	0.778751	0.560208	0	2.31361	1.2351	0	0.691491	14.4702	5.74534	1.19984	12.2054	MTMR9	protein_coding
310	ENSECAG00000015220	3.22663	-4.13221	1.76243	-2.34461	0.0190472	0.778751	1.12042	0	0	0	0	0	8.44093	14.9379	0	7.76708	PKP1	protein_coding
311	ENSECAG00000015351	36.7574	-1.43509	0.614754	-2.33441	0.0195742	0.778751	40.3349	6.95558	5.78402	22.2318	23.6114	76.064	57.8806	8.04348	105.586	21.0821	LRRN3	protein_coding
312	ENSECAG00000015578	367.506	0.527498	0.223604	2.35907	0.0183207	0.778751	436.402	390.145	417.606	352.004	573.233	268.298	352.107	236.708	449.94	198.615	WASL	protein_coding
313	ENSECAG00000015938	3.10891	-3.83398	1.63323	-2.34748	0.018901	0.778751	0	0	2.31361	0	0	0.691491	1.20585	4.59627	1.19984	21.0821	TNKS1BP1	protein_coding
314	ENSECAG00000016360	3.11819	3.71434	1.58523	2.34309	0.0191248	0.778751	12.8848	0	8.09762	1.2351	6.55872	0	1.20585	0	1.19984	0	PDE3A	protein_coding
315	ENSECAG00000019025	2.70742	-4.37139	1.86851	-2.33951	0.0193092	0.778751	0	0	0	1.2351	0	16.5958	0	8.04348	1.19984	0	PSTPIP2	protein_coding
316	ENSECAG00000019096	12.0273	-1.80204	0.761311	-2.36703	0.0179317	0.778751	1.68062	5.05861	0	2.4702	18.3644	14.5213	16.8819	17.236	25.1967	18.8629	CACNA1C	protein_coding
317	ENSECAG00000019144	2.45892	-4.19695	1.78569	-2.35033	0.0187567	0.778751	0	0	0	1.2351	0	0	1.20585	12.6398	8.39889	1.10958	CPNE4	protein_coding
318	ENSECAG00000019161	85.3091	-0.7296	0.307126	-2.37557	0.0175219	0.778751	68.3453	54.38	62.4674	67.9305	69.5225	190.16	73.5567	86.1801	69.5908	110.958	DIAPH3	protein_coding
319	ENSECAG00000019989	1183.36	0.296596	0.127016	2.33511	0.0195379	0.778751	1336.09	1358.24	1440.22	1057.25	1328.8	975.693	1011.71	1082.42	1174.64	1068.53	SNRPG	protein_coding
320	ENSECAG00000020612	30.6408	1.11773	0.471609	2.37002	0.0177869	0.778751	28.0104	43.6305	58.997	45.6987	32.7936	4.84043	13.2643	28.7267	21.5971	28.8491	SLC7A3	protein_coding
321	ENSECAG00000021122	74.3689	-1.09861	0.462381	-2.37599	0.017502	0.778751	43.6962	52.483	42.8017	66.6954	31.4819	177.713	21.7052	32.1739	129.583	145.355	THBS2	protein_coding
322	ENSECAG00000021452	48.2248	-0.763141	0.325739	-2.3428	0.0191395	0.778751	45.3768	33.5133	28.9201	38.2881	31.4819	38.032	66.3216	73.5404	47.9936	78.7804	BUB1B	protein_coding
323	ENSECAG00000021766	123.393	-0.775442	0.332101	-2.33495	0.0195458	0.778751	85.7118	108.76	76.349	69.1656	115.434	219.202	166.407	218.323	49.1935	125.383	PCOLCE	protein_coding
324	ENSECAG00000023112	40.322	0.836375	0.357795	2.33758	0.019409	0.778751	40.3349	71.4528	43.9585	39.5232	62.9638	29.0426	27.7345	18.3851	43.1943	26.63	EXT1	protein_coding
325	ENSECAG00000023444	461.897	-0.401104	0.171712	-2.33591	0.0194961	0.778751	306.994	400.262	404.881	426.11	456.487	670.054	559.513	438.944	447.541	508.189	EPHX2	protein_coding
326	ENSECAG00000023870	329.886	0.364242	0.152645	2.38621	0.017023	0.778751	425.198	354.735	327.375	366.825	380.406	262.766	341.255	270.031	279.563	290.711	ACSS1	protein_coding
327	ENSECAG00000029514	127.909	0.699573	0.296655	2.3582	0.0183636	0.778751	91.3138	104.334	205.911	228.494	162.656	70.532	98.8794	141.335	77.9896	97.6433	SLC2A6	protein_coding
328	ENSECAG00000030432	12.5216	-1.80222	0.763279	-2.36116	0.0182178	0.778751	1.12042	15.1758	4.62721	0	6.55872	29.7341	19.2935	21.8323	17.9976	8.87666	AGRN	protein_coding
329	ENSECAG00000036765	2.42483	-4.18183	1.78751	-2.33947	0.0193111	0.778751	0	0	1.1568	0	0	0	9.64677	1.14907	1.19984	11.0958	0	protein_coding
330	ENSECAG00000046252	4.77189	2.64751	1.12057	2.36265	0.0181446	0.778751	3.36125	6.32326	18.5088	4.9404	7.87047	0.691491	4.82339	0	1.19984	0	0	lncRNA
331	ENSECAG00000046473	3.89471	-3.45286	1.4643	-2.35803	0.018372	0.778751	0	0	1.1568	2.4702	0	0	6.02923	5.74534	17.9976	5.54791	OR2AG2	protein_coding
332	ENSECAG00000046735	34.5199	1.68003	0.710547	2.36442	0.0180582	0.778751	17.3664	40.4688	32.3905	40.7583	133.798	53.9363	3.61754	1.14907	8.39889	13.315	GSTA1	protein_coding
333	ENSECAG00000047648	6.88368	2.77398	1.1861	2.33875	0.0193485	0.778751	0.560208	1.89698	19.6657	18.5265	19.6762	2.76596	0	5.74534	0	0	0	lncRNA
334	ENSECAG00000050514	5.4529	-2.41252	1.01954	-2.36628	0.0179677	0.778751	3.36125	1.26465	0	3.7053	0	13.1383	18.0877	8.04348	3.59952	3.32875	0	protein_coding
335	ENSECAG00000055561	9.75621	2.20706	0.937698	2.3537	0.0185876	0.778751	20.7277	13.9112	30.0769	12.351	2.62349	0	13.2643	2.29814	1.19984	1.10958	0	lncRNA
336	ENSECAG00000056882	4.77852	2.88229	1.23355	2.33658	0.019461	0.778751	0	6.95558	4.62721	18.5265	11.8057	0	2.41169	1.14907	1.19984	1.10958	0	lncRNA
337	ENSECAG00000007671	27.4863	-1.79477	0.769384	-2.33274	0.0196619	0.779126	26.89	0	6.94082	24.702	2.62349	13.1383	31.352	103.416	19.1975	46.6025	ATP2A2	protein_coding
338	ENSECAG00000000495	14.7329	-1.20314	0.516713	-2.32844	0.0198886	0.785297	6.16228	8.22023	8.09762	12.351	10.494	24.8937	27.7345	19.5342	13.1982	16.6437	SLIT3	protein_coding
339	ENSECAG00000010867	622.157	-0.368414	0.158283	-2.32756	0.0199353	0.785297	494.663	650.663	519.405	624.961	423.694	592.607	663.216	710.124	751.1	791.132	FUBP1	protein_coding
340	ENSECAG00000009976	5.42731	-2.81376	1.20965	-2.32609	0.0200138	0.786073	0	0	1.1568	4.9404	1.31174	15.2128	1.20585	14.9379	14.3981	1.10958	NAXD	protein_coding
341	ENSECAG00000004961	38.4239	0.923465	0.397515	2.3231	0.0201739	0.787896	45.937	42.3658	48.5857	35.8179	78.7047	15.9043	32.5579	36.7702	13.1982	34.3971	TACSTD2	protein_coding
342	ENSECAG00000019364	13.8332	-1.4118	0.607896	-2.32245	0.020209	0.787896	16.246	2.5293	8.09762	4.9404	5.24698	17.2873	15.676	27.5776	25.1967	15.5342	GALNT18	protein_coding
343	ENSECAG00000024631	137.4	-0.708016	0.304927	-2.32192	0.0202373	0.787896	74.5076	75.2468	161.952	143.272	68.2107	164.575	270.11	151.677	152.38	112.068	CPXM2	protein_coding
344	ENSECAG00000010194	8.39123	-2.02601	0.874911	-2.31567	0.0205761	0.796761	1.68062	2.5293	1.1568	1.2351	10.494	10.3724	14.4702	24.1304	1.19984	16.6437	KHDRBS3	protein_coding
345	ENSECAG00000011279	134.603	-0.451321	0.195991	-2.30276	0.0212921	0.796761	98.0363	123.304	134.189	114.864	98.3809	153.511	170.024	168.913	142.781	142.027	TMEM19	protein_coding
346	ENSECAG00000011661	92.05	-0.742436	0.321564	-2.30883	0.020953	0.796761	73.3872	76.5114	56.6834	62.9901	73.4577	49.0958	94.0561	98.8199	182.376	153.122	NSD2	protein_coding
347	ENSECAG00000011694	5.58338	2.38514	1.03404	2.30662	0.0210758	0.796761	4.48166	14.5435	15.0384	9.8808	2.62349	0	0	3.44721	3.59952	2.21917	ZNRF3	protein_coding
348	ENSECAG00000012693	77.2979	0.592425	0.256592	2.30882	0.0209534	0.796761	103.078	97.3782	83.2898	91.3974	87.8869	42.1809	78.38	57.4534	57.5924	74.342	LONRF1	protein_coding
349	ENSECAG00000013058	307.714	-0.731831	0.316434	-2.31274	0.0207368	0.796761	243.13	421.761	142.287	137.096	209.879	490.958	636.687	265.435	259.166	270.738	PBX1	protein_coding
350	ENSECAG00000013555	62.1657	0.926988	0.402177	2.30493	0.0211707	0.796761	66.6647	46.7921	126.092	128.45	39.3523	27.6596	26.5286	45.9627	71.9904	42.1641	MAGEL2	protein_coding
351	ENSECAG00000014420	10.3898	-2.272	0.983554	-2.30999	0.0208886	0.796761	0.560208	0	9.25442	7.4106	1.31174	9.68087	3.61754	6.89441	10.7986	54.3695	TRNT1	protein_coding
352	ENSECAG00000018476	110.082	-0.672418	0.291701	-2.30517	0.0211573	0.796761	85.1515	80.3054	92.5442	98.808	68.2107	167.341	86.821	225.217	88.7882	107.63	TPX2	protein_coding
353	ENSECAG00000020275	250.553	0.571223	0.246888	2.3137	0.0206844	0.796761	222.402	228.27	478.916	316.186	251.855	134.149	232.728	242.453	224.37	174.204	MPC1	protein_coding
354	ENSECAG00000022969	7.36937	2.30407	0.996855	2.31134	0.0208141	0.796761	8.40311	7.58791	9.25442	14.8212	20.9879	0.691491	0	1.14907	10.7986	0	ELOVL4	protein_coding
355	ENSECAG00000033359	4.14605	-3.14008	1.36432	-2.30156	0.0213599	0.796761	1.12042	0.632326	1.1568	0	1.31174	10.3724	0	6.89441	0	19.9725	0	protein_coding
356	ENSECAG00000045402	58.1203	-1.27991	0.555979	-2.30209	0.0213303	0.796761	60.5024	48.6891	16.1952	4.9404	38.0406	147.287	89.2327	19.5342	122.384	34.3971	0	protein_coding
357	ENSECAG00000051385	4.32855	-3.60021	1.56228	-2.30446	0.0211966	0.796761	0	0	1.1568	1.2351	1.31174	17.9788	1.20585	0	20.3973	0	0	protein_coding
358	ENSECAG00000059611	3.97298	-3.047	1.32259	-2.30382	0.0212327	0.796761	0	0	2.31361	2.4702	0	15.9043	7.23508	2.29814	8.39889	1.10958	0	lncRNA
359	ENSECAG00000006674	27.7926	1.50757	0.655904	2.29846	0.0215358	0.801083	14.5654	12.0142	40.4881	25.9371	112.81	6.22341	22.9111	18.3851	2.39968	22.1917	RRAD	protein_coding
360	ENSECAG00000022111	149.798	0.564433	0.245921	2.29518	0.0217226	0.805786	108.68	181.477	189.716	161.798	254.479	143.139	114.555	96.5218	105.586	142.027	COA4	protein_coding
361	ENSECAG00000007794	123.796	0.490538	0.214276	2.28929	0.0220628	0.809459	151.816	135.95	179.304	124.745	131.174	106.49	107.32	103.416	121.184	76.5612	TAF10	protein_coding
362	ENSECAG00000011708	73.2735	0.591073	0.257954	2.29139	0.0219411	0.809459	65.5443	103.069	90.2306	74.106	107.563	52.5533	51.8514	63.1988	63.5916	61.027	GAREM1	protein_coding
363	ENSECAG00000022811	55.8293	-0.872865	0.38122	-2.28966	0.0220409	0.809459	47.0574	26.5577	43.9585	62.9901	17.0527	97.5002	38.5871	85.0311	85.1887	54.3695	VPS50	protein_coding
364	ENSECAG00000024352	17.7594	-1.30811	0.571585	-2.28857	0.0221042	0.809459	15.1256	15.1758	2.31361	9.8808	7.87047	44.9469	10.8526	24.1304	23.9968	23.3012	MYO1E	protein_coding
365	ENSECAG00000032959	31.557	-1.09481	0.478455	-2.28822	0.0221247	0.809459	28.5706	7.58791	17.352	13.5861	34.1054	58.0852	57.8806	18.3851	31.1959	48.8216	0	protein_coding
366	ENSECAG00000017251	571.754	-0.378664	0.165643	-2.28602	0.0222529	0.809931	513.15	517.242	522.875	423.639	508.957	763.406	753.654	450.435	653.913	610.27	PARK7	protein_coding
367	ENSECAG00000019326	2.7156	-4.35316	1.90434	-2.28592	0.0222589	0.809931	0	0	0	1.2351	0	0	0	1.14907	4.79936	19.9725	GRK3	protein_coding
368	ENSECAG00000000413	47.5633	-0.786387	0.344785	-2.2808	0.02256	0.810555	25.7695	43.6305	34.7041	48.1689	22.2997	61.5427	69.9391	33.323	70.7906	65.4654	DCAF6	protein_coding
369	ENSECAG00000003277	110.859	0.734028	0.322667	2.27487	0.0229134	0.810555	98.5965	146.7	135.346	140.801	170.527	52.5533	101.291	156.273	58.7922	47.7121	REL	protein_coding
370	ENSECAG00000004409	5.51245	2.33579	1.02508	2.27863	0.022689	0.810555	6.72249	9.48489	5.78402	19.7616	3.93523	0	3.61754	0	3.59952	2.21917	FSIP2L	protein_coding
371	ENSECAG00000008499	23.8256	-1.19204	0.525194	-2.26972	0.0232248	0.810555	11.2042	18.9698	16.1952	12.351	14.4292	80.2129	25.3228	22.9814	14.3981	22.1917	COL5A2	protein_coding
372	ENSECAG00000009261	2.49606	4.05056	1.78409	2.27038	0.0231844	0.810555	0	12.6465	1.1568	8.6457	1.31174	0	0	0	1.19984	0	AOAH	protein_coding
373	ENSECAG00000011101	153.32	-0.725914	0.319969	-2.2687	0.0232867	0.810555	115.963	134.053	75.1922	108.689	144.292	260.692	114.555	129.845	110.385	339.532	PTK7	protein_coding
374	ENSECAG00000011451	685.743	-0.417504	0.18341	-2.27635	0.0228252	0.810555	651.521	541.271	521.718	529.858	692.601	912.076	745.213	525.124	713.905	1024.14	SND1	protein_coding
375	ENSECAG00000016282	18.7138	1.21927	0.537922	2.26663	0.0234128	0.810555	35.8533	42.9981	13.8816	16.0563	22.2997	20.0532	6.02923	11.4907	9.59873	8.87666	NAALADL2	protein_coding
376	ENSECAG00000018686	317.714	0.533562	0.234593	2.27441	0.0229412	0.810555	409.512	263.047	503.209	414.994	287.272	177.022	244.787	350.466	321.557	205.273	PPA1	protein_coding
377	ENSECAG00000019749	39.3639	-0.795858	0.350136	-2.273	0.0230263	0.810555	33.0522	22.1314	23.1361	34.5828	31.4819	58.7767	36.1754	32.1739	59.992	62.1366	COMMD9	protein_coding
378	ENSECAG00000021383	65.541	0.763444	0.334452	2.28267	0.0224495	0.810555	106.439	105.598	39.3313	77.8113	81.3282	29.7341	50.6456	52.8572	68.3909	43.2737	EFNA1	protein_coding
379	ENSECAG00000021595	1247.26	-0.406093	0.179171	-2.2665	0.0234205	0.810555	826.866	1023.74	1094.34	938.676	1484.9	1714.2	1597.75	1075.53	1273.03	1443.57	FAM98A	protein_coding
[truncated: 38,470 more rows]
