# Supplementary material for: Follicular Fluid-Derived Extracellular Vesicles Influence on In Vitro Maturation of Equine Oocyte: Impact on Cumulus Cell Viability, Expansion and Transcriptome
Source: Int J Mol Sci. 2024 Mar 13;25(6):3262. doi: 10.3390/ijms25063262 (PMC10970002; doi:10.3390/ijms25063262)
Supplement: Supplementary file 1 [file ijms-25-03262-s001.zip › Table S5.xlsx]

## Sheet: KEGG, CP CC (DOWNREGULATED)
KEGG FOR GENES DOWNREGULATED IN CUMULUS CELLS OF COMPACTED COC GROUP
Enrichment FDR	nGenes	Pathway Genes	Fold Enrichment	Pathway	URL	Genes
0.0604950299623293	3	292	11.3078586878154	MAPK signaling pathway	http://www.genome.jp/kegg-bin/show_pathway?ecb04010	DUSP1 FOS GADD45A
0.0604950299623293	3	250	13.2075789473684	Endocytosis	http://www.genome.jp/kegg-bin/show_pathway?ecb04144	PARD6B KIF5C MHCX1
0.0604950299623293	2	89	24.7332939089296	Th1 and Th2 cell differentiation	http://www.genome.jp/kegg-bin/show_pathway?ecb04658	FOS MAF
0.0604950299623293	2	94	23.4176931690929	Colorectal cancer	http://www.genome.jp/kegg-bin/show_pathway?ecb05210	FOS GADD45A
0.0604950299623293	2	73	30.1542898341745	Non-small cell lung cancer	http://www.genome.jp/kegg-bin/show_pathway?ecb05223	KIF5C GADD45A
0.0770561570499582	2	141	15.611795446062	Apoptosis	http://www.genome.jp/kegg-bin/show_pathway?ecb04210	FOS GADD45A
0.0770561570499582	2	128	17.1973684210526	Dopaminergic synapse	http://www.genome.jp/kegg-bin/show_pathway?ecb04728	KIF5C FOS
0.0770561570499582	2	144	15.2865497076023	Breast cancer	http://www.genome.jp/kegg-bin/show_pathway?ecb05224	FOS GADD45A
0.0770561570499582	2	131	16.8035355564484	Fluid shear stress and atherosclerosis	http://www.genome.jp/kegg-bin/show_pathway?ecb05418	DUSP1 FOS
0.0809088422360974	2	156	14.110661268556	Cellular senescence	http://www.genome.jp/kegg-bin/show_pathway?ecb04218	MHCX1 GADD45A
0.0924850269084088	2	184	11.9633867276888	Kaposi sarcoma-associated herpesvirus infection	http://www.genome.jp/kegg-bin/show_pathway?ecb05167	FOS MHCX1
0.0924850269084088	2	184	11.9633867276888	Transcriptional misregulation in cancer	http://www.genome.jp/kegg-bin/show_pathway?ecb05202	MAF GADD45A
0.0990944234958886	2	199	11.0616239090188	Epstein-Barr virus infection	http://www.genome.jp/kegg-bin/show_pathway?ecb05169	MHCX1 GADD45A
0.101891844869941	2	210	10.4822055137845	Human immunodeficiency virus 1 infection	http://www.genome.jp/kegg-bin/show_pathway?ecb05170	FOS MHCX1
0.105621113424776	2	222	9.91559981033665	Human T-cell leukemia virus 1 infection	http://www.genome.jp/kegg-bin/show_pathway?ecb05166	FOS MHCX1
0.11735249806164	2	243	9.05869612302361	Salmonella infection	http://www.genome.jp/kegg-bin/show_pathway?ecb05132	KIF5C FOS
0.125327397078066	2	260	8.4663967611336	Parkinson disease	http://www.genome.jp/kegg-bin/show_pathway?ecb05012	DUSP1 KIF5C
0.161430458981021	1	95	11.585595567867	Endocrine resistance	http://www.genome.jp/kegg-bin/show_pathway?ecb01522	FOS
0.161430458981021	1	102	10.7905056759546	NF-kappa B signaling pathway	http://www.genome.jp/kegg-bin/show_pathway?ecb04064	GADD45A
0.161430458981021	1	75	14.6750877192982	P53 signaling pathway	http://www.genome.jp/kegg-bin/show_pathway?ecb04115	GADD45A
0.161430458981021	1	66	16.6762360446571	Antigen processing and presentation	http://www.genome.jp/kegg-bin/show_pathway?ecb04612	MHCX1
0.161430458981021	1	99	11.1174906964381	Toll-like receptor signaling pathway	http://www.genome.jp/kegg-bin/show_pathway?ecb04620	FOS
0.161430458981021	1	86	12.7980416156671	IL-17 signaling pathway	http://www.genome.jp/kegg-bin/show_pathway?ecb04657	FOS
0.161430458981021	1	107	10.2862764387605	Th17 cell differentiation	http://www.genome.jp/kegg-bin/show_pathway?ecb04659	FOS
0.161430458981021	1	104	10.582995951417	T cell receptor signaling pathway	http://www.genome.jp/kegg-bin/show_pathway?ecb04660	FOS
0.161430458981021	1	74	14.873399715505	B cell receptor signaling pathway	http://www.genome.jp/kegg-bin/show_pathway?ecb04662	FOS
0.161430458981021	1	108	10.1910331384016	TNF signaling pathway	http://www.genome.jp/kegg-bin/show_pathway?ecb04668	FOS
0.161430458981021	1	96	11.4649122807018	Circadian entrainment	http://www.genome.jp/kegg-bin/show_pathway?ecb04713	FOS
0.161430458981021	1	108	10.1910331384016	Cholinergic synapse	http://www.genome.jp/kegg-bin/show_pathway?ecb04725	FOS
0.161430458981021	1	68	16.1857585139319	Prolactin signaling pathway	http://www.genome.jp/kegg-bin/show_pathway?ecb04917	FOS
0.161430458981021	1	104	10.582995951417	Parathyroid hormone synthesis, secretion and action	http://www.genome.jp/kegg-bin/show_pathway?ecb04928	FOS
0.161430458981021	1	53	20.7666335650447	Type I diabetes mellitus	http://www.genome.jp/kegg-bin/show_pathway?ecb04940	MHCX1
0.161430458981021	1	65	16.9327935222672	Amphetamine addiction	http://www.genome.jp/kegg-bin/show_pathway?ecb05031	FOS
0.161430458981021	1	73	15.0771449170872	Pertussis	http://www.genome.jp/kegg-bin/show_pathway?ecb05133	FOS
0.161430458981021	1	69	15.951182303585	Leishmaniasis	http://www.genome.jp/kegg-bin/show_pathway?ecb05140	FOS
0.161430458981021	1	107	10.2862764387605	Chagas disease	http://www.genome.jp/kegg-bin/show_pathway?ecb05142	FOS
0.161430458981021	2	328	6.71116816431322	Human papillomavirus infection	http://www.genome.jp/kegg-bin/show_pathway?ecb05165	PARD6B MHCX1
0.161430458981021	2	524	4.20088388911209	Pathways in cancer	http://www.genome.jp/kegg-bin/show_pathway?ecb05200	FOS GADD45A
0.161430458981021	1	84	13.1027568922306	Pancreatic cancer	http://www.genome.jp/kegg-bin/show_pathway?ecb05212	GADD45A
0.161430458981021	1	59	18.6547725245317	Endometrial cancer	http://www.genome.jp/kegg-bin/show_pathway?ecb05213	GADD45A
0.161430458981021	1	75	14.6750877192982	Glioma	http://www.genome.jp/kegg-bin/show_pathway?ecb05214	GADD45A
0.161430458981021	1	38	28.9639889196676	Thyroid cancer	http://www.genome.jp/kegg-bin/show_pathway?ecb05216	GADD45A
0.161430458981021	1	61	18.0431406384815	Basal cell carcinoma	http://www.genome.jp/kegg-bin/show_pathway?ecb05217	GADD45A
0.161430458981021	1	73	15.0771449170872	Melanoma	http://www.genome.jp/kegg-bin/show_pathway?ecb05218	GADD45A
0.161430458981021	1	78	14.110661268556	Chronic myeloid leukemia	http://www.genome.jp/kegg-bin/show_pathway?ecb05220	GADD45A
0.161430458981021	1	92	11.9633867276888	Small cell lung cancer	http://www.genome.jp/kegg-bin/show_pathway?ecb05222	GADD45A
0.161430458981021	1	101	10.8973423658155	Choline metabolism in cancer	http://www.genome.jp/kegg-bin/show_pathway?ecb05231	FOS
0.161430458981021	1	91	12.0948525159051	PD-L1 expression and PD-1 checkpoint pathway in cancer	http://www.genome.jp/kegg-bin/show_pathway?ecb05235	FOS
0.161430458981021	1	57	19.3093259464451	Autoimmune thyroid disease	http://www.genome.jp/kegg-bin/show_pathway?ecb05320	MHCX1
0.161430458981021	1	64	17.1973684210526	Inflammatory bowel disease	http://www.genome.jp/kegg-bin/show_pathway?ecb05321	MAF
0.161430458981021	1	89	12.3666469544648	Rheumatoid arthritis	http://www.genome.jp/kegg-bin/show_pathway?ecb05323	FOS
0.161430458981021	1	44	25.0143540669856	Allograft rejection	http://www.genome.jp/kegg-bin/show_pathway?ecb05330	MHCX1
0.161430458981021	1	46	23.9267734553776	Graft-versus-host disease	http://www.genome.jp/kegg-bin/show_pathway?ecb05332	MHCX1
0.161430458981021	1	60	18.3438596491228	Viral myocarditis	http://www.genome.jp/kegg-bin/show_pathway?ecb05416	MHCX1
0.169011155467443	1	133	8.27542540561931	FoxO signaling pathway	http://www.genome.jp/kegg-bin/show_pathway?ecb04068	GADD45A
0.169011155467443	1	126	8.73517126148705	Cell cycle	http://www.genome.jp/kegg-bin/show_pathway?ecb04110	GADD45A
0.169011155467443	1	137	8.03380714560123	Autophagy	http://www.genome.jp/kegg-bin/show_pathway?ecb04140	DDIT4
0.169011155467443	1	150	7.33754385964912	Phagosome	http://www.genome.jp/kegg-bin/show_pathway?ecb04145	MHCX1
0.169011155467443	1	153	7.19367045063639	MTOR signaling pathway	http://www.genome.jp/kegg-bin/show_pathway?ecb04150	DDIT4
0.169011155467443	1	132	8.33811802232855	Vascular smooth muscle contraction	http://www.genome.jp/kegg-bin/show_pathway?ecb04270	ADM
0.169011155467443	1	121	9.09612875163114	Osteoclast differentiation	http://www.genome.jp/kegg-bin/show_pathway?ecb04380	FOS
0.169011155467443	1	152	7.2409972299169	Hippo signaling pathway	http://www.genome.jp/kegg-bin/show_pathway?ecb04390	PARD6B
0.169011155467443	1	141	7.80589772303098	Cell adhesion molecules	http://www.genome.jp/kegg-bin/show_pathway?ecb04514	MHCX1
0.169011155467443	1	119	9.24900486510393	Serotonergic synapse	http://www.genome.jp/kegg-bin/show_pathway?ecb04726	DUSP1
0.169011155467443	1	127	8.66639038541235	Estrogen signaling pathway	http://www.genome.jp/kegg-bin/show_pathway?ecb04915	FOS
0.169011155467443	1	146	7.53857245854362	Oxytocin signaling pathway	http://www.genome.jp/kegg-bin/show_pathway?ecb04921	FOS
0.169011155467443	1	125	8.80505263157895	Relaxin signaling pathway	http://www.genome.jp/kegg-bin/show_pathway?ecb04926	FOS
0.169011155467443	1	155	7.10084889643464	Non-alcoholic fatty liver disease	http://www.genome.jp/kegg-bin/show_pathway?ecb04932	FOS
0.169011155467443	1	119	9.24900486510393	Growth hormone synthesis, secretion and action	http://www.genome.jp/kegg-bin/show_pathway?ecb04935	FOS
0.169011155467443	1	135	8.15282651072125	Yersinia infection	http://www.genome.jp/kegg-bin/show_pathway?ecb05135	FOS
0.169011155467443	1	142	7.75092661230541	Measles	http://www.genome.jp/kegg-bin/show_pathway?ecb05162	FOS
0.169011155467443	1	156	7.055330634278	MicroRNAs in cancer	http://www.genome.jp/kegg-bin/show_pathway?ecb05206	DDIT4
0.169011155467443	1	144	7.64327485380117	Gastric cancer	http://www.genome.jp/kegg-bin/show_pathway?ecb05226	GADD45A
0.169418193402702	1	161	6.83622098725074	Hepatitis B	http://www.genome.jp/kegg-bin/show_pathway?ecb05161	FOS
0.169418193402702	1	159	6.92221118834823	Hepatocellular carcinoma	http://www.genome.jp/kegg-bin/show_pathway?ecb05225	GADD45A
0.17394283472512	1	168	6.55137844611529	Tight junction	http://www.genome.jp/kegg-bin/show_pathway?ecb04530	PARD6B
0.181598377422067	1	180	6.11461988304093	Axon guidance	http://www.genome.jp/kegg-bin/show_pathway?ecb04360	PARD6B
0.181598377422067	1	181	6.08083745274789	Chemical carcinogenesis	http://www.genome.jp/kegg-bin/show_pathway?ecb05207	FOS
0.187502452070011	1	190	5.79279778393352	Viral carcinogenesis	http://www.genome.jp/kegg-bin/show_pathway?ecb05203	MHCX1

## Sheet: KEGG, CP CC (UPREGULATED)
KEGG FOR GENES UPREGULATED IN CUMULUS CELLS OF COMPACTED COC GROUP
Enrichment FDR	nGenes	Pathway Genes	Fold Enrichment	Pathway	URL	Genes
0.0356845344172121	1	44	59.4090909090909	Fatty acid degradation	http://www.genome.jp/kegg-bin/show_pathway?ecb00071	LOC100034175
0.0356845344172121	1	41	63.7560975609756	Tyrosine metabolism	http://www.genome.jp/kegg-bin/show_pathway?ecb00350	LOC100034175
0.0356845344172121	1	43	60.7906976744186	Pyruvate metabolism	http://www.genome.jp/kegg-bin/show_pathway?ecb00620	LOC100034175
0.0356845344172121	1	47	55.6170212765957	Drug metabolism	http://www.genome.jp/kegg-bin/show_pathway?ecb00982	LOC100034175
0.0362918025663742	1	62	42.1612903225806	Glycolysis / Gluconeogenesis	http://www.genome.jp/kegg-bin/show_pathway?ecb00010	LOC100034175
0.0362918025663742	1	72	36.3055555555556	Bacterial invasion of epithelial cells	http://www.genome.jp/kegg-bin/show_pathway?ecb05100	SEPTIN9
0.0593862166032431	1	139	18.8057553956835	Alcoholic liver disease	http://www.genome.jp/kegg-bin/show_pathway?ecb04936	LOC100034175

## Sheet: GO, CP CC (DOWNREGULATED)
GO BIOLOGICAL PROCESSES FOR GENES DOWNREGULATED IN CUMULUS CELLS OF COMPACTED COC GROUP
Enrichment FDR	nGenes	Pathway Genes	Fold Enrichment	Pathway	URL	Genes
0.00252168719906457	8	1139	7.7305115290421	Cell cycle	http://amigo.geneontology.org/amigo/term/GO:0007049	GPNMB PARD6B NUSAP1 ASPM JUN CENPF KIFC1 GADD45A
0.00590656937302602	6	907	7.28091452445889	Negative regulation of RNA biosynthetic process	http://amigo.geneontology.org/amigo/term/GO:1902679	HMGB2 JUN CENPF MAF FOXL2 GADD45A
0.00590656937302602	6	906	7.28895085395608	Negative regulation of nucleic acid-templated transcription	http://amigo.geneontology.org/amigo/term/GO:1903507	HMGB2 JUN CENPF MAF FOXL2 GADD45A
0.00590656937302602	6	733	9.00926258347096	Microtubule-based process	http://amigo.geneontology.org/amigo/term/GO:0007017	PARD6B CEP57 KIF5C NUSAP1 ASPM KIFC1
0.00590656937302602	3	102	32.3715170278638	Response to mechanical stimulus	http://amigo.geneontology.org/amigo/term/GO:0009612	FOS JUN GADD45A
0.00590656937302602	6	861	7.66990647350082	Cell cycle process	http://amigo.geneontology.org/amigo/term/GO:0022402	GPNMB PARD6B NUSAP1 ASPM CENPF KIFC1
0.00590656937302602	5	525	10.4822055137845	Microtubule cytoskeleton organization	http://amigo.geneontology.org/amigo/term/GO:0000226	PARD6B CEP57 NUSAP1 ASPM KIFC1
0.00590656937302602	2	13	169.327935222672	Response to muscle stretch	http://amigo.geneontology.org/amigo/term/GO:0035994	FOS JUN
0.00590656937302602	4	272	16.1857585139319	Negative regulation of phosphorylation	http://amigo.geneontology.org/amigo/term/GO:0042326	DDIT4 DUSP1 JUN GADD45A
0.00590656937302602	6	904	7.30507685142059	Negative regulation of transcription, DNA-templated	http://amigo.geneontology.org/amigo/term/GO:0045892	HMGB2 JUN CENPF MAF FOXL2 GADD45A
0.00590656937302602	7	1066	7.22741186926039	Negative regulation of nucleobase-containing compound metabolic process	http://amigo.geneontology.org/amigo/term/GO:0045934	DDIT4 HMGB2 JUN CENPF MAF FOXL2 GADD45A
0.00590656937302602	8	1711	5.14614414469839	Negative regulation of nitrogen compound metabolic process	http://amigo.geneontology.org/amigo/term/GO:0051172	DDIT4 DUSP1 HMGB2 JUN CENPF MAF FOXL2 GADD45A
0.00590656937302602	5	388	14.1833966359197	Organelle localization	http://amigo.geneontology.org/amigo/term/GO:0051640	KIF5C NUSAP1 ASPM CENPF KIFC1
0.00590656937302602	4	276	15.951182303585	Establishment of organelle localization	http://amigo.geneontology.org/amigo/term/GO:0051656	KIF5C NUSAP1 CENPF KIFC1
0.00596236399495169	8	1858	4.73899495779276	Negative regulation of cellular metabolic process	http://amigo.geneontology.org/amigo/term/GO:0031324	DDIT4 DUSP1 HMGB2 JUN CENPF MAF FOXL2 GADD45A
0.00795805670413967	6	987	6.6907694768837	Negative regulation of RNA metabolic process	http://amigo.geneontology.org/amigo/term/GO:0051253	HMGB2 JUN CENPF MAF FOXL2 GADD45A
0.00795805670413967	2	22	100.057416267943	Cellular response to cadmium ion	http://amigo.geneontology.org/amigo/term/GO:0071276	FOS JUN
0.00947788045769768	6	1064	6.20656905421448	Negative regulation of cellular macromolecule biosynthetic process	http://amigo.geneontology.org/amigo/term/GO:2000113	HMGB2 JUN CENPF MAF FOXL2 GADD45A
0.00947788045769768	7	1537	5.01263568811423	Movement of cell or subcellular component	http://amigo.geneontology.org/amigo/term/GO:0006928	GPNMB DUSP1 HMGB2 KIF5C JUN KIFC1 GADD45A
0.00947788045769768	6	1074	6.14877977065569	Negative regulation of macromolecule biosynthetic process	http://amigo.geneontology.org/amigo/term/GO:0010558	HMGB2 JUN CENPF MAF FOXL2 GADD45A
0.00947788045769768	2	26	84.663967611336	Response to cadmium ion	http://amigo.geneontology.org/amigo/term/GO:0046686	FOS JUN
0.00947788045769768	2	27	81.5282651072125	Regulation of p38MAPK cascade	http://amigo.geneontology.org/amigo/term/GO:1900744	DUSP1 GADD45A
0.00967879835993191	6	1124	5.87525753886496	Negative regulation of biosynthetic process	http://amigo.geneontology.org/amigo/term/GO:0009890	HMGB2 JUN CENPF MAF FOXL2 GADD45A
0.00967879835993191	4	376	11.7088465845465	Negative regulation of phosphorus metabolic process	http://amigo.geneontology.org/amigo/term/GO:0010563	DDIT4 DUSP1 JUN GADD45A
0.00967879835993191	6	1105	5.97628006668254	Negative regulation of cellular biosynthetic process	http://amigo.geneontology.org/amigo/term/GO:0031327	HMGB2 JUN CENPF MAF FOXL2 GADD45A
0.00967879835993191	2	31	71.0084889643464	Regulation of protein autophosphorylation	http://amigo.geneontology.org/amigo/term/GO:0031952	GPNMB JUN
0.00967879835993191	2	31	71.0084889643464	P38MAPK cascade	http://amigo.geneontology.org/amigo/term/GO:0038066	DUSP1 GADD45A
0.00967879835993191	4	376	11.7088465845465	Negative regulation of phosphate metabolic process	http://amigo.geneontology.org/amigo/term/GO:0045936	DDIT4 DUSP1 JUN GADD45A
0.0163904311360621	2	41	53.6893453145058	Spindle localization	http://amigo.geneontology.org/amigo/term/GO:0051653	NUSAP1 ASPM
0.0194698845407562	7	1834	4.20088388911209	Response to external stimulus	http://amigo.geneontology.org/amigo/term/GO:0009605	DDIT4 DUSP1 HMGB2 KIF5C FOS JUN GADD45A
0.0194915746464869	6	1310	5.04106066693451	Cell death	http://amigo.geneontology.org/amigo/term/GO:0008219	GPNMB DDIT4 HMGB2 JUN FOXL2 GADD45A
0.0219561969491012	6	1348	4.89895361549274	Locomotion	http://amigo.geneontology.org/amigo/term/GO:0040011	GPNMB DUSP1 HMGB2 KIF5C JUN GADD45A
0.0224815303989146	4	510	8.63240454076367	Mitotic cell cycle process	http://amigo.geneontology.org/amigo/term/GO:1903047	GPNMB NUSAP1 CENPF KIFC1
0.0224815303989146	7	1954	3.94289716101923	Immune system process	http://amigo.geneontology.org/amigo/term/GO:0002376	GPNMB DDIT4 DUSP1 HMGB2 FOS JUN MHCX1
0.0224815303989146	5	915	6.01438021282715	Regulation of phosphorylation	http://amigo.geneontology.org/amigo/term/GO:0042325	GPNMB DDIT4 DUSP1 JUN GADD45A
0.0224815303989146	2	55	40.022966507177	Metaphase plate congression	http://amigo.geneontology.org/amigo/term/GO:0051310	CENPF KIFC1
0.0224815303989146	2	55	40.022966507177	Cellular response to calcium ion	http://amigo.geneontology.org/amigo/term/GO:0071277	FOS JUN
0.0224815303989146	3	225	14.6750877192982	Nuclear chromosome segregation	http://amigo.geneontology.org/amigo/term/GO:0098813	NUSAP1 CENPF KIFC1
0.0242169567375144	3	239	13.815459149967	Negative regulation of protein phosphorylation	http://amigo.geneontology.org/amigo/term/GO:0001933	DUSP1 JUN GADD45A
0.025653535851509	3	246	13.4223363286264	Camera-type eye development	http://amigo.geneontology.org/amigo/term/GO:0043010	JUN MAF FOXL2
0.0260772343245817	5	972	5.66168507688976	Response to endogenous stimulus	http://amigo.geneontology.org/amigo/term/GO:0009719	DDIT4 HMGB2 CEP57 FOS JUN
0.0260772343245817	2	62	35.5042444821732	Positive regulation of endothelial cell proliferation	http://amigo.geneontology.org/amigo/term/GO:0001938	HMGB2 JUN
0.0285103609468606	3	268	12.3205027494108	Chromosome segregation	http://amigo.geneontology.org/amigo/term/GO:0007059	NUSAP1 CENPF KIFC1
0.0285103609468606	2	68	32.3715170278638	Chromosome localization	http://amigo.geneontology.org/amigo/term/GO:0050000	CENPF KIFC1
0.0285103609468606	2	67	32.8546739984289	Establishment of chromosome localization	http://amigo.geneontology.org/amigo/term/GO:0051303	CENPF KIFC1
0.0285103609468606	2	66	33.3524720893142	SMAD protein signal transduction	http://amigo.geneontology.org/amigo/term/GO:0060395	FOS JUN
0.0309532147541647	3	281	11.7505150777299	Eye development	http://amigo.geneontology.org/amigo/term/GO:0001654	JUN MAF FOXL2
0.0309532147541647	5	1051	5.23611597976864	Regulation of cell death	http://amigo.geneontology.org/amigo/term/GO:0010941	GPNMB HMGB2 JUN FOXL2 GADD45A
0.0309532147541647	2	74	29.74679943101	Positive regulation of myeloid cell differentiation	http://amigo.geneontology.org/amigo/term/GO:0045639	HMGB2 FOS
0.0309532147541647	3	286	11.5450864924549	Sensory system development	http://amigo.geneontology.org/amigo/term/GO:0048880	JUN MAF FOXL2
0.0309532147541647	3	282	11.7088465845465	Visual system development	http://amigo.geneontology.org/amigo/term/GO:0150063	JUN MAF FOXL2
0.0311752780412532	4	625	7.04404210526316	Mitotic cell cycle	http://amigo.geneontology.org/amigo/term/GO:0000278	GPNMB NUSAP1 CENPF KIFC1
0.031236138012708	1	3	366.877192982456	Negative regulation of transcription from RNA polymerase II promoter in response to endoplasmic reticulum stress	http://amigo.geneontology.org/amigo/term/GO:1990441	JUN
0.031236138012708	4	650	6.77311740890688	Response to abiotic stimulus	http://amigo.geneontology.org/amigo/term/GO:0009628	DDIT4 FOS JUN GADD45A
0.031236138012708	5	1084	5.07671392503399	Cell migration	http://amigo.geneontology.org/amigo/term/GO:0016477	GPNMB DUSP1 HMGB2 JUN GADD45A
0.031236138012708	5	1079	5.10023901273109	Regulation of phosphate metabolic process	http://amigo.geneontology.org/amigo/term/GO:0019220	GPNMB DDIT4 DUSP1 JUN GADD45A
0.031236138012708	3	291	11.3467173087358	Myeloid cell differentiation	http://amigo.geneontology.org/amigo/term/GO:0030099	HMGB2 FOS JUN
0.031236138012708	4	654	6.73169161435699	Regulation of cell migration	http://amigo.geneontology.org/amigo/term/GO:0030334	GPNMB DUSP1 JUN GADD45A
0.031236138012708	1	3	366.877192982456	Negative regulation of peptidyl-serine phosphorylation of STAT protein	http://amigo.geneontology.org/amigo/term/GO:0033140	GADD45A
0.031236138012708	2	83	26.5212428662016	Cellular response to reactive oxygen species	http://amigo.geneontology.org/amigo/term/GO:0034614	FOS JUN
0.031236138012708	2	84	26.2055137844612	Regulation of DNA binding	http://amigo.geneontology.org/amigo/term/GO:0051101	HMGB2 JUN
0.031236138012708	5	1079	5.10023901273109	Regulation of phosphorus metabolic process	http://amigo.geneontology.org/amigo/term/GO:0051174	GPNMB DDIT4 DUSP1 JUN GADD45A
0.031236138012708	2	85	25.897213622291	Response to calcium ion	http://amigo.geneontology.org/amigo/term/GO:0051592	FOS JUN
0.031236138012708	6	1659	3.98058437232321	Cellular response to organic substance	http://amigo.geneontology.org/amigo/term/GO:0071310	DDIT4 DUSP1 HMGB2 CEP57 FOS JUN
0.031236138012708	2	83	26.5212428662016	Negative regulation of protein serine/threonine kinase activity	http://amigo.geneontology.org/amigo/term/GO:0071901	DUSP1 GADD45A
0.031236138012708	1	3	366.877192982456	Negative regulation of monocyte chemotaxis	http://amigo.geneontology.org/amigo/term/GO:0090027	DUSP1
0.033509292435476	5	1144	4.81045270518955	Cytoskeleton organization	http://amigo.geneontology.org/amigo/term/GO:0007010	PARD6B CEP57 NUSAP1 ASPM KIFC1
0.0343505316284788	4	694	6.34369786136812	Regulation of cell motility	http://amigo.geneontology.org/amigo/term/GO:2000145	GPNMB DUSP1 JUN GADD45A
0.0343505316284788	4	692	6.36203224825068	Regulation of cell cycle	http://amigo.geneontology.org/amigo/term/GO:0051726	GPNMB JUN CENPF GADD45A
0.0354038256685684	5	1173	4.69152420693678	Apoptotic process	http://amigo.geneontology.org/amigo/term/GO:0006915	DDIT4 HMGB2 JUN FOXL2 GADD45A
0.0354038256685684	2	95	23.1711911357341	Regulation of endothelial cell proliferation	http://amigo.geneontology.org/amigo/term/GO:0001936	HMGB2 JUN
0.0354774675615421	3	339	9.74010246856078	Positive regulation of apoptotic process	http://amigo.geneontology.org/amigo/term/GO:0043065	JUN FOXL2 GADD45A
0.0359653355423546	4	714	6.16600324340262	Cellular response to oxygen-containing compound	http://amigo.geneontology.org/amigo/term/GO:1901701	DDIT4 HMGB2 FOS JUN
0.0368578125744095	4	727	6.05574458843119	Regulation of locomotion	http://amigo.geneontology.org/amigo/term/GO:0040012	GPNMB DUSP1 JUN GADD45A
0.0368578125744095	3	349	9.46101643794299	Positive regulation of programmed cell death	http://amigo.geneontology.org/amigo/term/GO:0043068	JUN FOXL2 GADD45A
0.0368578125744095	1	4	275.157894736842	Anterograde dendritic transport of neurotransmitter receptor complex	http://amigo.geneontology.org/amigo/term/GO:0098971	KIF5C
0.0368889277701947	5	1214	4.53307899072227	Programmed cell death	http://amigo.geneontology.org/amigo/term/GO:0012501	DDIT4 HMGB2 JUN FOXL2 GADD45A
0.0368889277701947	5	1215	4.5293480615118	Cell motility	http://amigo.geneontology.org/amigo/term/GO:0048870	GPNMB DUSP1 HMGB2 JUN GADD45A
0.0368889277701947	5	1215	4.5293480615118	Localization of cell	http://amigo.geneontology.org/amigo/term/GO:0051674	GPNMB DUSP1 HMGB2 JUN GADD45A
0.037310490680469	4	740	5.94935988620199	Regulation of cellular component movement	http://amigo.geneontology.org/amigo/term/GO:0051270	GPNMB DUSP1 JUN GADD45A
0.0384490438899628	2	106	20.7666335650447	Response to reactive oxygen species	http://amigo.geneontology.org/amigo/term/GO:0000302	FOS JUN
0.0393912521049041	2	108	20.3820662768031	Endothelial cell proliferation	http://amigo.geneontology.org/amigo/term/GO:0001935	HMGB2 JUN
0.0403346165841661	2	110	20.0114832535885	Cellular response to metal ion	http://amigo.geneontology.org/amigo/term/GO:0071248	FOS JUN
0.0407777530700243	3	378	8.73517126148705	Positive regulation of cell death	http://amigo.geneontology.org/amigo/term/GO:0010942	JUN FOXL2 GADD45A
0.0407777530700243	1	5	220.126315789474	Positive regulation of nuclease activity	http://amigo.geneontology.org/amigo/term/GO:0032075	HMGB2
0.0412464827494853	6	1849	3.57154649739546	Regulation of multicellular organismal process	http://amigo.geneontology.org/amigo/term/GO:0051239	GPNMB HMGB2 FOS JUN MAF GADD45A
0.0419300163629262	2	116	18.9764065335753	Microtubule cytoskeleton organization involved in mitosis	http://amigo.geneontology.org/amigo/term/GO:1902850	NUSAP1 KIFC1
0.0419300163629262	6	1868	3.53521920432774	Regulation of transcription by RNA polymerase II	http://amigo.geneontology.org/amigo/term/GO:0006357	HMGB2 FOS JUN MAF FOXL2 GADD45A
0.0419300163629262	2	116	18.9764065335753	Skeletal muscle tissue development	http://amigo.geneontology.org/amigo/term/GO:0007519	FOS FOXL2
0.0420188827474868	1	6	183.438596491228	Negative regulation of p38MAPK cascade	http://amigo.geneontology.org/amigo/term/GO:1903753	DUSP1
0.0420188827474868	4	800	5.50315789473684	Regulation of protein phosphorylation	http://amigo.geneontology.org/amigo/term/GO:0001932	GPNMB DUSP1 JUN GADD45A
0.0420188827474868	3	396	8.33811802232855	Negative regulation of protein modification process	http://amigo.geneontology.org/amigo/term/GO:0031400	DUSP1 JUN GADD45A
0.0420188827474868	2	119	18.4980097302079	Regulation of stress-activated MAPK cascade	http://amigo.geneontology.org/amigo/term/GO:0032872	DUSP1 GADD45A
0.0420188827474868	2	121	18.1922575032623	Skeletal muscle organ development	http://amigo.geneontology.org/amigo/term/GO:0060538	FOS FOXL2
0.0420188827474868	2	122	18.0431406384815	Regulation of stress-activated protein kinase signaling cascade	http://amigo.geneontology.org/amigo/term/GO:0070302	DUSP1 GADD45A
0.0420188827474868	2	121	18.1922575032623	Cellular response to inorganic substance	http://amigo.geneontology.org/amigo/term/GO:0071241	FOS JUN
0.0420188827474868	1	6	183.438596491228	Anterograde dendritic transport	http://amigo.geneontology.org/amigo/term/GO:0098937	KIF5C
0.0420188827474868	2	119	18.4980097302079	Negative regulation of neuron death	http://amigo.geneontology.org/amigo/term/GO:1901215	GPNMB JUN
0.0433625575620001	2	125	17.6101052631579	Spermatid development	http://amigo.geneontology.org/amigo/term/GO:0007286	HMGB2 CEP57
0.0444162290647492	6	1942	3.40050951271072	Transcription by RNA polymerase II	http://amigo.geneontology.org/amigo/term/GO:0006366	HMGB2 FOS JUN MAF FOXL2 GADD45A
0.0444162290647492	2	132	16.6762360446571	Mitotic sister chromatid segregation	http://amigo.geneontology.org/amigo/term/GO:0000070	NUSAP1 KIFC1
0.0444162290647492	5	1353	4.06737464503832	Tissue development	http://amigo.geneontology.org/amigo/term/GO:0009888	DUSP1 FOS JUN MAF FOXL2
0.0444162290647492	5	1354	4.06437067558112	Cellular response to stress	http://amigo.geneontology.org/amigo/term/GO:0033554	DDIT4 DUSP1 FOS JUN GADD45A
0.0444162290647492	3	426	7.75092661230541	Regulation of MAPK cascade	http://amigo.geneontology.org/amigo/term/GO:0043408	DUSP1 JUN GADD45A
0.0444162290647492	1	7	157.233082706767	Positive regulation of megakaryocyte differentiation	http://amigo.geneontology.org/amigo/term/GO:0045654	HMGB2
0.0444162290647492	2	128	17.1973684210526	Spermatid differentiation	http://amigo.geneontology.org/amigo/term/GO:0048515	HMGB2 CEP57
0.0444162290647492	2	133	16.5508508112386	Positive regulation of epithelial cell proliferation	http://amigo.geneontology.org/amigo/term/GO:0050679	HMGB2 JUN
0.0444162290647492	1	7	157.233082706767	Cellular response to dexamethasone stimulus	http://amigo.geneontology.org/amigo/term/GO:0071549	DDIT4
0.0444162290647492	1	7	157.233082706767	Dendritic transport	http://amigo.geneontology.org/amigo/term/GO:0098935	KIF5C
0.0459535765474004	2	136	16.1857585139319	Regulation of myeloid cell differentiation	http://amigo.geneontology.org/amigo/term/GO:0045637	HMGB2 FOS
0.0464250244937152	3	437	7.55582319643502	Sensory organ development	http://amigo.geneontology.org/amigo/term/GO:0007423	JUN MAF FOXL2
0.0464250244937152	2	138	15.951182303585	Response to steroid hormone	http://amigo.geneontology.org/amigo/term/GO:0048545	DDIT4 HMGB2
0.0466607331256605	2	139	15.836425596365	Stress-activated MAPK cascade	http://amigo.geneontology.org/amigo/term/GO:0051403	DUSP1 GADD45A
0.0473677159483832	2	142	15.5018532246108	Gonad development	http://amigo.geneontology.org/amigo/term/GO:0008406	HMGB2 FOXL2
0.0473677159483832	1	8	137.578947368421	Response to dexamethasone	http://amigo.geneontology.org/amigo/term/GO:0071548	DDIT4
0.0473677159483832	1	8	137.578947368421	Negative regulation of transcription from RNA polymerase II promoter in response to stress	http://amigo.geneontology.org/amigo/term/GO:0097201	JUN
0.0477287321329024	3	449	7.35388582815614	Chemotaxis	http://amigo.geneontology.org/amigo/term/GO:0006935	DUSP1 HMGB2 KIF5C
0.0480743523703382	2	145	15.1811252268603	Negative regulation of protein kinase activity	http://amigo.geneontology.org/amigo/term/GO:0006469	DUSP1 GADD45A
0.0480743523703382	3	452	7.30507685142059	Taxis	http://amigo.geneontology.org/amigo/term/GO:0042330	DUSP1 HMGB2 KIF5C
0.0483097936070054	2	146	15.0771449170872	Development of primary sexual characteristics	http://amigo.geneontology.org/amigo/term/GO:0045137	HMGB2 FOXL2
0.0483261537368683	2	149	14.7735782409043	Spindle organization	http://amigo.geneontology.org/amigo/term/GO:0007051	ASPM KIFC1
0.0483261537368683	2	147	14.9745793054064	Transforming growth factor beta receptor signaling pathway	http://amigo.geneontology.org/amigo/term/GO:0007179	FOS JUN
0.0483261537368683	2	151	14.5779017079122	Stress-activated protein kinase signaling cascade	http://amigo.geneontology.org/amigo/term/GO:0031098	DUSP1 GADD45A
0.0483261537368683	1	9	122.292397660819	Negative regulation of protein autophosphorylation	http://amigo.geneontology.org/amigo/term/GO:0031953	JUN
0.0483261537368683	5	1445	3.80841376798397	Cell development	http://amigo.geneontology.org/amigo/term/GO:0048468	HMGB2 CEP57 KIF5C JUN MAF
0.0483261537368683	3	464	7.11615245009074	Cellular response to growth factor stimulus	http://amigo.geneontology.org/amigo/term/GO:0071363	CEP57 FOS JUN
0.0483261537368683	4	900	4.89169590643275	Cellular response to endogenous stimulus	http://amigo.geneontology.org/amigo/term/GO:0071495	DDIT4 CEP57 FOS JUN
0.0483261537368683	2	149	14.7735782409043	Reactive oxygen species metabolic process	http://amigo.geneontology.org/amigo/term/GO:0072593	DDIT4 GADD45A
0.0484110728371778	3	469	7.04028728537762	Negative regulation of cell population proliferation	http://amigo.geneontology.org/amigo/term/GO:0008285	GPNMB DUSP1 JUN
0.0484110728371778	4	913	4.82204415749121	Response to oxygen-containing compound	http://amigo.geneontology.org/amigo/term/GO:1901700	DDIT4 HMGB2 FOS JUN
0.0493647921104893	2	155	14.2016977928693	Myeloid leukocyte differentiation	http://amigo.geneontology.org/amigo/term/GO:0002573	FOS JUN
0.0493647921104893	3	475	6.95135734072022	Response to growth factor	http://amigo.geneontology.org/amigo/term/GO:0070848	CEP57 FOS JUN
0.0507445291265865	2	158	13.9320453031312	Sister chromatid segregation	http://amigo.geneontology.org/amigo/term/GO:0000819	NUSAP1 KIFC1
0.0509485546554811	5	1500	3.66877192982456	Phosphorylation	http://amigo.geneontology.org/amigo/term/GO:0016310	GPNMB DDIT4 DUSP1 JUN GADD45A
0.0509485546554811	3	491	6.72483653124665	MAPK cascade	http://amigo.geneontology.org/amigo/term/GO:0000165	DUSP1 JUN GADD45A
0.0509485546554811	2	161	13.6724419745015	Negative regulation of kinase activity	http://amigo.geneontology.org/amigo/term/GO:0033673	DUSP1 GADD45A
0.0509485546554811	4	941	4.67856144079647	Regulation of apoptotic process	http://amigo.geneontology.org/amigo/term/GO:0042981	HMGB2 JUN FOXL2 GADD45A
0.0509485546554811	4	946	4.65383331478803	Positive regulation of transcription by RNA polymerase II	http://amigo.geneontology.org/amigo/term/GO:0045944	HMGB2 FOS JUN MAF
0.0509485546554811	1	10	110.063157894737	Eyelid development in camera-type eye	http://amigo.geneontology.org/amigo/term/GO:0061029	JUN
0.0509485546554811	2	162	13.5880441845354	Regulation of neuron death	http://amigo.geneontology.org/amigo/term/GO:1901214	GPNMB JUN
0.0518850538205279	1	11	100.057416267943	Mitotic chromosome condensation	http://amigo.geneontology.org/amigo/term/GO:0007076	NUSAP1
0.0518850538205279	2	169	13.0252257863594	Cellular response to oxidative stress	http://amigo.geneontology.org/amigo/term/GO:0034599	FOS JUN
0.0518850538205279	4	967	4.55276764817939	Regulation of programmed cell death	http://amigo.geneontology.org/amigo/term/GO:0043067	HMGB2 JUN FOXL2 GADD45A
0.0518850538205279	1	11	100.057416267943	Antigen processing and presentation of endogenous peptide antigen via MHC class Ib	http://amigo.geneontology.org/amigo/term/GO:0002476	MHCX1
0.0518850538205279	1	11	100.057416267943	Negative regulation by host of viral transcription	http://amigo.geneontology.org/amigo/term/GO:0043922	JUN
0.0518850538205279	1	11	100.057416267943	Negative regulation of glycolytic process	http://amigo.geneontology.org/amigo/term/GO:0045820	DDIT4
0.0518850538205279	2	168	13.1027568922306	Protein autophosphorylation	http://amigo.geneontology.org/amigo/term/GO:0046777	GPNMB JUN
0.0518850538205279	1	11	100.057416267943	Peptidyl-serine dephosphorylation	http://amigo.geneontology.org/amigo/term/GO:0070262	DUSP1
0.0521222570436272	2	170	12.9486068111455	Response to metal ion	http://amigo.geneontology.org/amigo/term/GO:0010038	FOS JUN
0.0536893726791339	1	12	91.719298245614	Apoptotic DNA fragmentation	http://amigo.geneontology.org/amigo/term/GO:0006309	FOXL2
0.0536893726791339	2	175	12.5786466165414	Regulation of epithelial cell migration	http://amigo.geneontology.org/amigo/term/GO:0010632	JUN GADD45A
0.0536893726791339	1	12	91.719298245614	Antigen processing and presentation of peptide antigen via MHC class Ib	http://amigo.geneontology.org/amigo/term/GO:0002428	MHCX1
0.0536893726791339	2	175	12.5786466165414	Cellular response to transforming growth factor beta stimulus	http://amigo.geneontology.org/amigo/term/GO:0071560	FOS JUN
0.0555196209444548	5	1569	3.50743014323572	Nervous system development	http://amigo.geneontology.org/amigo/term/GO:0007399	HMGB2 KIF5C FOS JUN CENPF
0.0558890462237098	2	180	12.2292397660819	Response to transforming growth factor beta	http://amigo.geneontology.org/amigo/term/GO:0071559	FOS JUN
0.0561209853253718	2	181	12.1616749054958	Sex differentiation	http://amigo.geneontology.org/amigo/term/GO:0007548	HMGB2 FOXL2
0.0569447311250041	2	183	12.0287604256543	Negative regulation of transferase activity	http://amigo.geneontology.org/amigo/term/GO:0051348	DUSP1 GADD45A
0.0592779362822727	2	190	11.585595567867	Negative regulation of cell migration	http://amigo.geneontology.org/amigo/term/GO:0030336	DUSP1 GADD45A
0.0592779362822727	1	14	78.6165413533835	Regulation of megakaryocyte differentiation	http://amigo.geneontology.org/amigo/term/GO:0045652	HMGB2
0.0592779362822727	4	1031	4.27015161570269	Regulation of immune system process	http://amigo.geneontology.org/amigo/term/GO:0002682	GPNMB DUSP1 HMGB2 FOS
0.0592779362822727	2	190	11.585595567867	Neuron death	http://amigo.geneontology.org/amigo/term/GO:0070997	GPNMB JUN
0.0592779362822727	1	14	78.6165413533835	Negative regulation of purine nucleotide metabolic process	http://amigo.geneontology.org/amigo/term/GO:1900543	DDIT4
0.0600996219732825	2	192	11.4649122807018	Negative regulation of cell adhesion	http://amigo.geneontology.org/amigo/term/GO:0007162	GPNMB DUSP1
0.0605101777551072	2	197	11.1739246593641	Regulation of mitotic cell cycle phase transition	http://amigo.geneontology.org/amigo/term/GO:1901990	GPNMB CENPF
0.0605101777551072	1	15	73.3754385964912	Spermatid nucleus differentiation	http://amigo.geneontology.org/amigo/term/GO:0007289	HMGB2
0.0605101777551072	1	15	73.3754385964912	Peptidyl-threonine dephosphorylation	http://amigo.geneontology.org/amigo/term/GO:0035970	DUSP1
0.0605101777551072	1	15	73.3754385964912	Positive regulation by host of viral transcription	http://amigo.geneontology.org/amigo/term/GO:0043923	JUN
0.0605101777551072	1	15	73.3754385964912	Negative regulation of nucleotide metabolic process	http://amigo.geneontology.org/amigo/term/GO:0045980	DDIT4
0.0605101777551072	1	15	73.3754385964912	Cellular response to glucocorticoid stimulus	http://amigo.geneontology.org/amigo/term/GO:0071385	DDIT4
0.0605101777551072	1	15	73.3754385964912	Negative regulation of mononuclear cell migration	http://amigo.geneontology.org/amigo/term/GO:0071676	DUSP1
0.0613210225506533	2	199	11.0616239090188	Negative regulation of cell motility	http://amigo.geneontology.org/amigo/term/GO:2000146	DUSP1 GADD45A
0.0620970207557973	2	202	10.8973423658155	Germ cell development	http://amigo.geneontology.org/amigo/term/GO:0007281	HMGB2 CEP57
0.0620970207557973	1	16	68.7894736842105	Positive regulation of protein autophosphorylation	http://amigo.geneontology.org/amigo/term/GO:0031954	GPNMB
0.0620970207557973	1	16	68.7894736842105	Regulation of peptidyl-serine phosphorylation of STAT protein	http://amigo.geneontology.org/amigo/term/GO:0033139	GADD45A
0.0620970207557973	1	16	68.7894736842105	Negative regulation of leukocyte chemotaxis	http://amigo.geneontology.org/amigo/term/GO:0002689	DUSP1
0.0620970207557973	2	204	10.7905056759546	Negative regulation of cellular component movement	http://amigo.geneontology.org/amigo/term/GO:0051271	DUSP1 GADD45A
0.0620970207557973	2	204	10.7905056759546	Cellular response to chemical stress	http://amigo.geneontology.org/amigo/term/GO:0062197	FOS JUN
0.0637034713956012	2	208	10.582995951417	Muscle organ development	http://amigo.geneontology.org/amigo/term/GO:0007517	FOS FOXL2
0.0637034713956012	2	208	10.582995951417	Cellular response to external stimulus	http://amigo.geneontology.org/amigo/term/GO:0071496	FOS GADD45A
0.0638032223621614	1	17	64.7430340557275	Regulation of nuclease activity	http://amigo.geneontology.org/amigo/term/GO:0032069	HMGB2
0.0638032223621614	1	17	64.7430340557275	Cellular response to corticosteroid stimulus	http://amigo.geneontology.org/amigo/term/GO:0071384	DDIT4
0.0638032223621614	1	17	64.7430340557275	Positive regulation of p38MAPK cascade	http://amigo.geneontology.org/amigo/term/GO:1900745	GADD45A
0.0647736901734586	4	1100	4.0022966507177	Regulation of cell population proliferation	http://amigo.geneontology.org/amigo/term/GO:0042127	GPNMB DUSP1 HMGB2 JUN
0.0656321117330279	1	18	61.1461988304094	Negative regulation of extrinsic apoptotic signaling pathway via death domain receptors	http://amigo.geneontology.org/amigo/term/GO:1902042	HMGB2
0.0656321117330279	4	1114	3.95199848814136	Regulation of intracellular signal transduction	http://amigo.geneontology.org/amigo/term/GO:1902531	DDIT4 DUSP1 JUN GADD45A
0.0656321117330279	1	18	61.1461988304094	Microglial cell activation	http://amigo.geneontology.org/amigo/term/GO:0001774	JUN
0.0656321117330279	1	18	61.1461988304094	Apoptotic nuclear changes	http://amigo.geneontology.org/amigo/term/GO:0030262	FOXL2
0.0656321117330279	2	215	10.2384332925337	Negative regulation of locomotion	http://amigo.geneontology.org/amigo/term/GO:0040013	DUSP1 GADD45A
0.0656321117330279	3	603	5.47577899973815	Developmental process involved in reproduction	http://amigo.geneontology.org/amigo/term/GO:0003006	HMGB2 CEP57 FOXL2
0.0661542667453088	2	219	10.0514299447248	Mitotic nuclear division	http://amigo.geneontology.org/amigo/term/GO:0140014	NUSAP1 KIFC1
0.0664983458060106	1	19	57.9279778393352	Negative regulation of ATP metabolic process	http://amigo.geneontology.org/amigo/term/GO:1903579	DDIT4
0.0664983458060106	1	19	57.9279778393352	DNA catabolic process, endonucleolytic	http://amigo.geneontology.org/amigo/term/GO:0000737	FOXL2
0.0664983458060106	1	19	57.9279778393352	Cellular component disassembly involved in execution phase of apoptosis	http://amigo.geneontology.org/amigo/term/GO:0006921	FOXL2
0.0664983458060106	1	19	57.9279778393352	Serine phosphorylation of STAT protein	http://amigo.geneontology.org/amigo/term/GO:0042501	GADD45A
0.0664983458060106	1	19	57.9279778393352	Antigen processing and presentation of endogenous peptide antigen	http://amigo.geneontology.org/amigo/term/GO:0002483	MHCX1
0.0673486222502287	2	225	9.7833918128655	Epithelial cell migration	http://amigo.geneontology.org/amigo/term/GO:0010631	JUN GADD45A
0.0673486222502287	5	1749	3.14645963106738	Regulation of cellular protein metabolic process	http://amigo.geneontology.org/amigo/term/GO:0032268	GPNMB DUSP1 JUN FOXL2 GADD45A
0.0679219805632302	2	227	9.69719452817065	Epithelium migration	http://amigo.geneontology.org/amigo/term/GO:0090132	JUN GADD45A
0.069131031220891	4	1150	3.82828375286041	Regulation of protein modification process	http://amigo.geneontology.org/amigo/term/GO:0031399	GPNMB DUSP1 JUN GADD45A
0.0701952679533569	1	21	52.4110275689223	Positive regulation of vascular associated smooth muscle cell proliferation	http://amigo.geneontology.org/amigo/term/GO:1904707	JUN
0.0701952679533569	1	21	52.4110275689223	Negative regulation of peptidyl-serine phosphorylation	http://amigo.geneontology.org/amigo/term/GO:0033137	GADD45A
0.0701952679533569	1	21	52.4110275689223	Antigen processing and presentation via MHC class Ib	http://amigo.geneontology.org/amigo/term/GO:0002475	MHCX1
0.0701952679533569	1	21	52.4110275689223	Positive regulation of osteoclast differentiation	http://amigo.geneontology.org/amigo/term/GO:0045672	FOS
0.0701952679533569	2	233	9.44748136435509	Tissue migration	http://amigo.geneontology.org/amigo/term/GO:0090130	JUN GADD45A
0.070504460984223	3	640	5.15921052631579	Hemopoiesis	http://amigo.geneontology.org/amigo/term/GO:0030097	HMGB2 FOS JUN
0.070504460984223	2	236	9.32738626226583	Cell chemotaxis	http://amigo.geneontology.org/amigo/term/GO:0060326	DUSP1 HMGB2
0.0717477957645705	3	646	5.11129216229428	Negative regulation of cell death	http://amigo.geneontology.org/amigo/term/GO:0060548	GPNMB HMGB2 JUN
0.0717477957645705	2	240	9.1719298245614	Regulation of protein serine/threonine kinase activity	http://amigo.geneontology.org/amigo/term/GO:0071900	DUSP1 GADD45A
0.0717477957645705	1	22	50.0287081339713	Regulation of monocyte chemotaxis	http://amigo.geneontology.org/amigo/term/GO:0090025	DUSP1
0.0738492727711402	2	248	8.87606112054329	Regulation of hemopoiesis	http://amigo.geneontology.org/amigo/term/GO:1903706	HMGB2 FOS
0.0738492727711402	2	248	8.87606112054329	Striated muscle tissue development	http://amigo.geneontology.org/amigo/term/GO:0014706	FOS FOXL2
0.0738492727711402	3	658	5.01807710766277	Negative regulation of transcription by RNA polymerase II	http://amigo.geneontology.org/amigo/term/GO:0000122	JUN MAF GADD45A
0.0738492727711402	1	23	47.8535469107551	Monocyte differentiation	http://amigo.geneontology.org/amigo/term/GO:0030224	JUN
0.0738492727711402	2	247	8.91199659066695	Regulation of epithelial cell proliferation	http://amigo.geneontology.org/amigo/term/GO:0050678	HMGB2 JUN
0.0738492727711402	1	23	47.8535469107551	Lens fiber cell differentiation	http://amigo.geneontology.org/amigo/term/GO:0070306	MAF
0.0756687641843102	1	24	45.859649122807	Ventricular system development	http://amigo.geneontology.org/amigo/term/GO:0021591	CENPF
0.0769271289528156	2	255	8.63240454076367	Response to oxidative stress	http://amigo.geneontology.org/amigo/term/GO:0006979	FOS JUN
0.0769271289528156	3	676	4.88445966988477	Hematopoietic or lymphoid organ development	http://amigo.geneontology.org/amigo/term/GO:0048534	HMGB2 FOS JUN
0.0773552868521016	1	25	44.0252631578947	DNA catabolic process	http://amigo.geneontology.org/amigo/term/GO:0006308	FOXL2
0.0773552868521016	1	25	44.0252631578947	Positive regulation of erythrocyte differentiation	http://amigo.geneontology.org/amigo/term/GO:0045648	HMGB2
0.0778128893970196	2	263	8.36982189313588	Regulation of cell cycle phase transition	http://amigo.geneontology.org/amigo/term/GO:1901987	GPNMB CENPF
0.0778128893970196	4	1236	3.5619144949753	Positive regulation of RNA biosynthetic process	http://amigo.geneontology.org/amigo/term/GO:1902680	HMGB2 FOS JUN MAF
0.0778128893970196	4	1235	3.56479863626678	Positive regulation of nucleic acid-templated transcription	http://amigo.geneontology.org/amigo/term/GO:1903508	HMGB2 FOS JUN MAF
0.0778128893970196	1	26	42.331983805668	Positive regulation of DNA-templated transcription, initiation	http://amigo.geneontology.org/amigo/term/GO:2000144	JUN
0.0778128893970196	1	27	40.7641325536062	Motor neuron axon guidance	http://amigo.geneontology.org/amigo/term/GO:0008045	KIF5C
0.0778128893970196	2	267	8.24443130297654	Response to inorganic substance	http://amigo.geneontology.org/amigo/term/GO:0010035	FOS JUN
0.0778128893970196	1	27	40.7641325536062	Antigen processing and presentation of endogenous antigen	http://amigo.geneontology.org/amigo/term/GO:0019883	MHCX1
0.0778128893970196	1	27	40.7641325536062	Axon regeneration	http://amigo.geneontology.org/amigo/term/GO:0031103	JUN
0.0778128893970196	1	27	40.7641325536062	Negative regulation of stress-activated MAPK cascade	http://amigo.geneontology.org/amigo/term/GO:0032873	DUSP1
0.0778128893970196	1	27	40.7641325536062	Negative regulation of blood vessel endothelial cell migration	http://amigo.geneontology.org/amigo/term/GO:0043537	GADD45A
0.0778128893970196	4	1235	3.56479863626678	Positive regulation of transcription, DNA-templated	http://amigo.geneontology.org/amigo/term/GO:0045893	HMGB2 FOS JUN MAF
0.0778128893970196	2	268	8.21366849960723	Regulation of binding	http://amigo.geneontology.org/amigo/term/GO:0051098	HMGB2 JUN
0.0778128893970196	5	1877	2.93189019431904	Regulation of protein metabolic process	http://amigo.geneontology.org/amigo/term/GO:0051246	GPNMB DUSP1 JUN FOXL2 GADD45A
0.0778128893970196	1	26	42.331983805668	Response to glucocorticoid	http://amigo.geneontology.org/amigo/term/GO:0051384	DDIT4
0.0778128893970196	2	265	8.30665342601787	Muscle tissue development	http://amigo.geneontology.org/amigo/term/GO:0060537	FOS FOXL2
0.0778128893970196	1	27	40.7641325536062	Negative regulation of stress-activated protein kinase signaling cascade	http://amigo.geneontology.org/amigo/term/GO:0070303	DUSP1
0.0793088858059291	4	1264	3.48301132578281	Protein phosphorylation	http://amigo.geneontology.org/amigo/term/GO:0006468	GPNMB DUSP1 JUN GADD45A
0.0796477472345249	1	28	39.3082706766917	Positive regulation of interferon-beta production	http://amigo.geneontology.org/amigo/term/GO:0032728	HMGB2
0.0796477472345249	1	28	39.3082706766917	Microtubule anchoring	http://amigo.geneontology.org/amigo/term/GO:0034453	CEP57
0.0807480702567631	2	276	7.97559115179252	Cellular process involved in reproduction in multicellular organism	http://amigo.geneontology.org/amigo/term/GO:0022412	HMGB2 CEP57
0.080934728805228	5	1935	2.84400924792602	Regulation of localization	http://amigo.geneontology.org/amigo/term/GO:0032879	GPNMB PARD6B DUSP1 JUN GADD45A
0.080934728805228	1	29	37.9528130671506	Establishment of mitotic spindle localization	http://amigo.geneontology.org/amigo/term/GO:0040001	NUSAP1
0.080934728805228	2	278	7.91821279818251	Mitotic cell cycle phase transition	http://amigo.geneontology.org/amigo/term/GO:0044772	GPNMB CENPF
0.080934728805228	1	29	37.9528130671506	Synaptic vesicle transport	http://amigo.geneontology.org/amigo/term/GO:0048489	KIF5C
0.0811873064679311	2	282	7.80589772303098	Transmembrane receptor protein serine/threonine kinase signaling pathway	http://amigo.geneontology.org/amigo/term/GO:0007178	FOS JUN
0.0811873064679311	1	30	36.6877192982456	Negative regulation of cellular carbohydrate metabolic process	http://amigo.geneontology.org/amigo/term/GO:0010677	DDIT4
0.0811873064679311	1	30	36.6877192982456	Chromosome condensation	http://amigo.geneontology.org/amigo/term/GO:0030261	NUSAP1
0.0811873064679311	1	30	36.6877192982456	Response to corticosteroid	http://amigo.geneontology.org/amigo/term/GO:0031960	DDIT4
0.0811873064679311	3	727	4.54180844132339	Negative regulation of cellular protein metabolic process	http://amigo.geneontology.org/amigo/term/GO:0032269	DUSP1 JUN GADD45A
0.0811873064679311	3	723	4.56693601222974	Immune system development	http://amigo.geneontology.org/amigo/term/GO:0002520	HMGB2 FOS JUN
0.0811873064679311	2	281	7.83367671848661	Negative regulation of immune system process	http://amigo.geneontology.org/amigo/term/GO:0002683	GPNMB DUSP1
0.0815667910034205	3	731	4.51695586435309	Enzyme linked receptor protein signaling pathway	http://amigo.geneontology.org/amigo/term/GO:0007167	CEP57 FOS JUN
0.0828671161775437	1	31	35.5042444821732	Regulation of DNA-templated transcription, initiation	http://amigo.geneontology.org/amigo/term/GO:2000142	JUN
0.0828671161775437	1	31	35.5042444821732	Neuron projection regeneration	http://amigo.geneontology.org/amigo/term/GO:0031102	JUN
0.0835269782101006	1	32	34.3947368421053	Regulation of glycolytic process	http://amigo.geneontology.org/amigo/term/GO:0006110	DDIT4
0.0835269782101006	1	32	34.3947368421053	Regulation of vascular associated smooth muscle cell proliferation	http://amigo.geneontology.org/amigo/term/GO:1904705	JUN
0.0835269782101006	1	32	34.3947368421053	Vascular associated smooth muscle cell proliferation	http://amigo.geneontology.org/amigo/term/GO:1990874	JUN
0.0835269782101006	1	32	34.3947368421053	Positive regulation of reactive oxygen species metabolic process	http://amigo.geneontology.org/amigo/term/GO:2000379	GADD45A
0.0835269782101006	2	294	7.48728965270319	Microtubule-based movement	http://amigo.geneontology.org/amigo/term/GO:0007018	KIF5C KIFC1
0.0835269782101006	4	1323	3.3276842900903	Cell population proliferation	http://amigo.geneontology.org/amigo/term/GO:0008283	GPNMB DUSP1 HMGB2 JUN
0.0835269782101006	1	32	34.3947368421053	Regulation of stem cell proliferation	http://amigo.geneontology.org/amigo/term/GO:0072091	HMGB2
0.0835335144443142	1	33	33.3524720893142	Intrinsic apoptotic signaling pathway in response to DNA damage by p53 class mediator	http://amigo.geneontology.org/amigo/term/GO:0042771	DDIT4
0.0835335144443142	2	297	7.41166046429204	Positive regulation of MAPK cascade	http://amigo.geneontology.org/amigo/term/GO:0043410	JUN GADD45A
0.0835335144443142	1	33	33.3524720893142	Negative regulation of leukocyte migration	http://amigo.geneontology.org/amigo/term/GO:0002686	DUSP1
0.0835335144443142	2	296	7.43669985775249	Reproductive structure development	http://amigo.geneontology.org/amigo/term/GO:0048608	HMGB2 FOXL2
0.0835335144443142	2	296	7.43669985775249	Epithelial cell proliferation	http://amigo.geneontology.org/amigo/term/GO:0050673	HMGB2 JUN
0.0835335144443142	4	1328	3.31515535827521	Positive regulation of RNA metabolic process	http://amigo.geneontology.org/amigo/term/GO:0051254	HMGB2 FOS JUN MAF
0.0835335144443142	2	298	7.38678912045214	Reproductive system development	http://amigo.geneontology.org/amigo/term/GO:0061458	HMGB2 FOXL2
0.0835343608255307	1	34	32.3715170278638	Regulation of extrinsic apoptotic signaling pathway via death domain receptors	http://amigo.geneontology.org/amigo/term/GO:1902041	HMGB2
0.0835343608255307	1	34	32.3715170278638	Positive regulation of pri-miRNA transcription by RNA polymerase II	http://amigo.geneontology.org/amigo/term/GO:1902895	JUN
0.0835343608255307	2	301	7.31316663752404	Spermatogenesis	http://amigo.geneontology.org/amigo/term/GO:0007283	HMGB2 CEP57
0.0835343608255307	2	302	7.28895085395608	Cellular component disassembly	http://amigo.geneontology.org/amigo/term/GO:0022411	DDIT4 FOXL2
0.0835343608255307	1	34	32.3715170278638	Inflammatory response to antigenic stimulus	http://amigo.geneontology.org/amigo/term/GO:0002437	HMGB2
0.0835343608255307	1	34	32.3715170278638	Negative regulation of DNA binding	http://amigo.geneontology.org/amigo/term/GO:0043392	JUN
0.0835343608255307	1	34	32.3715170278638	Positive regulation of fibroblast proliferation	http://amigo.geneontology.org/amigo/term/GO:0048146	JUN
0.0835343608255307	1	34	32.3715170278638	Response to axon injury	http://amigo.geneontology.org/amigo/term/GO:0048678	JUN
0.084726460552956	1	35	31.4466165413534	Regulation of carbohydrate catabolic process	http://amigo.geneontology.org/amigo/term/GO:0043470	DDIT4
0.084726460552956	1	35	31.4466165413534	Regulation of transcription from RNA polymerase II promoter in response to stress	http://amigo.geneontology.org/amigo/term/GO:0043618	JUN
0.084726460552956	1	35	31.4466165413534	Negative regulation of carbohydrate metabolic process	http://amigo.geneontology.org/amigo/term/GO:0045912	DDIT4
0.084726460552956	3	771	4.28261314765513	Negative regulation of protein metabolic process	http://amigo.geneontology.org/amigo/term/GO:0051248	DUSP1 JUN GADD45A
0.0852823721725073	1	36	30.5730994152047	Ovarian follicle development	http://amigo.geneontology.org/amigo/term/GO:0001541	FOXL2
0.0852823721725073	2	312	7.055330634278	Regulation of mitotic cell cycle	http://amigo.geneontology.org/amigo/term/GO:0007346	GPNMB CENPF
0.0852823721725073	1	36	30.5730994152047	Megakaryocyte differentiation	http://amigo.geneontology.org/amigo/term/GO:0030219	HMGB2
0.0852823721725073	3	781	4.22777815216659	Negative regulation of molecular function	http://amigo.geneontology.org/amigo/term/GO:0044092	DUSP1 JUN GADD45A
0.0852823721725073	1	36	30.5730994152047	Antigen processing and presentation of peptide antigen	http://amigo.geneontology.org/amigo/term/GO:0048002	MHCX1
0.0852823721725073	1	36	30.5730994152047	Establishment of spindle localization	http://amigo.geneontology.org/amigo/term/GO:0051293	NUSAP1
0.0853740212195087	2	314	7.0103922225947	Ameboidal-type cell migration	http://amigo.geneontology.org/amigo/term/GO:0001667	JUN GADD45A
0.0853740212195087	2	314	7.0103922225947	Male gamete generation	http://amigo.geneontology.org/amigo/term/GO:0048232	HMGB2 CEP57
0.0861083591626573	1	37	29.74679943101	Negative regulation of TOR signaling	http://amigo.geneontology.org/amigo/term/GO:0032007	DDIT4
0.0861083591626573	1	37	29.74679943101	Positive regulation of smooth muscle cell proliferation	http://amigo.geneontology.org/amigo/term/GO:0048661	JUN
0.0861083591626573	1	37	29.74679943101	Synaptic vesicle localization	http://amigo.geneontology.org/amigo/term/GO:0097479	KIF5C
0.0869003013714194	4	1387	3.17413577201837	Positive regulation of macromolecule biosynthetic process	http://amigo.geneontology.org/amigo/term/GO:0010557	HMGB2 FOS JUN MAF
0.0872810608306833	1	38	28.9639889196676	Interferon-beta production	http://amigo.geneontology.org/amigo/term/GO:0032608	HMGB2
0.0872810608306833	1	38	28.9639889196676	Regulation of interferon-beta production	http://amigo.geneontology.org/amigo/term/GO:0032648	HMGB2
0.0872810608306833	2	322	6.83622098725074	Cellular response to lipid	http://amigo.geneontology.org/amigo/term/GO:0071396	DDIT4 HMGB2
0.0882587167418711	1	39	28.221322537112	Negative regulation of MAP kinase activity	http://amigo.geneontology.org/amigo/term/GO:0043407	DUSP1
0.0882587167418711	1	39	28.221322537112	Regulation of DNA-templated transcription in response to stress	http://amigo.geneontology.org/amigo/term/GO:0043620	JUN
0.0882587167418711	1	39	28.221322537112	Regulation of erythrocyte differentiation	http://amigo.geneontology.org/amigo/term/GO:0045646	HMGB2
0.0882587167418711	1	39	28.221322537112	Cellular response to mechanical stimulus	http://amigo.geneontology.org/amigo/term/GO:0071260	GADD45A
0.088994759725097	1	40	27.5157894736842	Negative regulation of endothelial cell migration	http://amigo.geneontology.org/amigo/term/GO:0010596	GADD45A
0.088994759725097	1	40	27.5157894736842	Regulation of chondrocyte differentiation	http://amigo.geneontology.org/amigo/term/GO:0032330	MAF
0.088994759725097	1	40	27.5157894736842	Positive regulation of DNA binding	http://amigo.geneontology.org/amigo/term/GO:0043388	HMGB2
0.088994759725097	1	40	27.5157894736842	Negative regulation of chemotaxis	http://amigo.geneontology.org/amigo/term/GO:0050922	DUSP1
0.088994759725097	1	40	27.5157894736842	Receptor localization to synapse	http://amigo.geneontology.org/amigo/term/GO:0097120	KIF5C
0.0902895246507057	1	41	26.8446726572529	Regulation of pri-miRNA transcription by RNA polymerase II	http://amigo.geneontology.org/amigo/term/GO:1902893	JUN
0.0902895246507057	1	41	26.8446726572529	Endoderm formation	http://amigo.geneontology.org/amigo/term/GO:0001706	DUSP1
0.0902895246507057	1	41	26.8446726572529	Pri-miRNA transcription by RNA polymerase II	http://amigo.geneontology.org/amigo/term/GO:0061614	JUN
0.0914343551305035	1	42	26.2055137844612	Viral transcription	http://amigo.geneontology.org/amigo/term/GO:0019083	JUN
0.0914343551305035	2	339	6.49340164570719	Nuclear division	http://amigo.geneontology.org/amigo/term/GO:0000280	NUSAP1 KIFC1
0.0914343551305035	1	42	26.2055137844612	Positive regulation of myeloid leukocyte differentiation	http://amigo.geneontology.org/amigo/term/GO:0002763	FOS
0.0914343551305035	2	340	6.47430340557275	Axon development	http://amigo.geneontology.org/amigo/term/GO:0061564	KIF5C JUN
0.0916281373530499	1	43	25.5960832313341	Negative regulation of G1/S transition of mitotic cell cycle	http://amigo.geneontology.org/amigo/term/GO:2000134	GPNMB
0.0916281373530499	1	43	25.5960832313341	Mitotic metaphase plate congression	http://amigo.geneontology.org/amigo/term/GO:0007080	KIFC1
0.0916281373530499	4	1446	3.04462400815316	Positive regulation of cellular biosynthetic process	http://amigo.geneontology.org/amigo/term/GO:0031328	HMGB2 FOS JUN MAF
0.0916281373530499	1	43	25.5960832313341	Regulation of osteoclast differentiation	http://amigo.geneontology.org/amigo/term/GO:0045670	FOS
0.0916281373530499	4	1445	3.04673101438718	Positive regulation of nucleobase-containing compound metabolic process	http://amigo.geneontology.org/amigo/term/GO:0045935	HMGB2 FOS JUN MAF
0.0916281373530499	1	43	25.5960832313341	Cellular response to ketone	http://amigo.geneontology.org/amigo/term/GO:1901655	DDIT4
0.0923130796184972	2	346	6.36203224825068	Cell cycle phase transition	http://amigo.geneontology.org/amigo/term/GO:0044770	GPNMB CENPF
0.0931312816174993	1	44	25.0143540669856	Axo-dendritic transport	http://amigo.geneontology.org/amigo/term/GO:0008088	KIF5C
0.0943234373425638	4	1465	3.00513741692114	Positive regulation of biosynthetic process	http://amigo.geneontology.org/amigo/term/GO:0009891	HMGB2 FOS JUN MAF
0.0946139142002487	1	45	24.4584795321637	Negative regulation of cell cycle G1/S phase transition	http://amigo.geneontology.org/amigo/term/GO:1902807	GPNMB
0.0960764175651497	1	46	23.9267734553776	Regulation of tissue remodeling	http://amigo.geneontology.org/amigo/term/GO:0034103	GPNMB
0.0960764175651497	1	46	23.9267734553776	Modulation by host of symbiont process	http://amigo.geneontology.org/amigo/term/GO:0051851	JUN
0.0971353633761719	3	864	3.82163742690058	Regulation of response to stress	http://amigo.geneontology.org/amigo/term/GO:0080134	DUSP1 HMGB2 GADD45A
0.0975191647604496	1	47	23.4176931690929	Negative regulation of T cell proliferation	http://amigo.geneontology.org/amigo/term/GO:0042130	GPNMB
0.0989425197067522	1	48	22.9298245614035	Positive regulation of type I interferon production	http://amigo.geneontology.org/amigo/term/GO:0032481	HMGB2
0.0989425197067522	1	48	22.9298245614035	Monocyte chemotaxis	http://amigo.geneontology.org/amigo/term/GO:0002548	DUSP1
0.101035285841749	3	882	3.74364482635159	Negative regulation of signal transduction	http://amigo.geneontology.org/amigo/term/GO:0009968	DDIT4 DUSP1 HMGB2
0.101735006609335	2	372	5.9173740803622	Negative regulation of intracellular signal transduction	http://amigo.geneontology.org/amigo/term/GO:1902532	DDIT4 DUSP1
0.10204074474666	1	50	22.0126315789474	Defense response to Gram-negative bacterium	http://amigo.geneontology.org/amigo/term/GO:0050829	HMGB2
0.102791057245448	2	376	5.85442329227324	Positive regulation of cell migration	http://amigo.geneontology.org/amigo/term/GO:0030335	GPNMB JUN
0.102791057245448	2	377	5.83889431802317	Organelle fission	http://amigo.geneontology.org/amigo/term/GO:0048285	NUSAP1 KIFC1
0.102791057245448	4	1525	2.88690250215703	Establishment of localization in cell	http://amigo.geneontology.org/amigo/term/GO:0051649	KIF5C NUSAP1 CENPF KIFC1
0.102791057245448	1	51	21.5810113519092	Cellular response to ionizing radiation	http://amigo.geneontology.org/amigo/term/GO:0071479	GADD45A
0.105255339492498	3	908	3.63644794806399	Regulation of multicellular organismal development	http://amigo.geneontology.org/amigo/term/GO:2000026	HMGB2 FOS MAF
0.105255339492498	3	915	3.60862812769629	Reproduction	http://amigo.geneontology.org/amigo/term/GO:0000003	HMGB2 CEP57 FOXL2
0.105255339492498	1	53	20.7666335650447	Negative regulation of epithelial cell migration	http://amigo.geneontology.org/amigo/term/GO:0010633	GADD45A
0.105255339492498	1	54	20.3820662768031	Viral gene expression	http://amigo.geneontology.org/amigo/term/GO:0019080	JUN
0.105255339492498	3	913	3.61653311811841	Reproductive process	http://amigo.geneontology.org/amigo/term/GO:0022414	HMGB2 CEP57 FOXL2
0.105255339492498	1	54	20.3820662768031	Macrophage activation	http://amigo.geneontology.org/amigo/term/GO:0042116	JUN
0.105255339492498	1	54	20.3820662768031	Fibroblast proliferation	http://amigo.geneontology.org/amigo/term/GO:0048144	JUN
0.105255339492498	1	53	20.7666335650447	Regulation of fibroblast proliferation	http://amigo.geneontology.org/amigo/term/GO:0048145	JUN
0.105255339492498	1	54	20.3820662768031	Stem cell proliferation	http://amigo.geneontology.org/amigo/term/GO:0072089	HMGB2
0.105255339492498	1	53	20.7666335650447	Mitotic spindle assembly	http://amigo.geneontology.org/amigo/term/GO:0090307	KIFC1
0.105255339492498	1	54	20.3820662768031	Regulation of purine nucleotide metabolic process	http://amigo.geneontology.org/amigo/term/GO:1900542	DDIT4
0.106517587791345	1	55	20.0114832535885	Regulation of nucleotide metabolic process	http://amigo.geneontology.org/amigo/term/GO:0006140	DDIT4
0.106517587791345	1	55	20.0114832535885	Skeletal muscle cell differentiation	http://amigo.geneontology.org/amigo/term/GO:0035914	FOS
0.106646874302361	2	394	5.58696232968207	Positive regulation of cell motility	http://amigo.geneontology.org/amigo/term/GO:2000147	GPNMB JUN
0.107786627064036	1	56	19.6541353383459	Mitotic cytokinesis	http://amigo.geneontology.org/amigo/term/GO:0000281	NUSAP1
0.108069120926297	1	57	19.3093259464451	Regulation of ATP metabolic process	http://amigo.geneontology.org/amigo/term/GO:1903578	DDIT4
0.108069120926297	3	934	3.53521920432774	Negative regulation of cell communication	http://amigo.geneontology.org/amigo/term/GO:0010648	DDIT4 DUSP1 HMGB2
0.108069120926297	3	936	3.527665317139	Negative regulation of signaling	http://amigo.geneontology.org/amigo/term/GO:0023057	DDIT4 DUSP1 HMGB2
0.108069120926297	2	399	5.51695027041287	Positive regulation of cellular component movement	http://amigo.geneontology.org/amigo/term/GO:0051272	GPNMB JUN
0.108069120926297	1	57	19.3093259464451	Regulation of cartilage development	http://amigo.geneontology.org/amigo/term/GO:0061035	MAF
0.108069120926297	2	402	5.47577899973815	Muscle structure development	http://amigo.geneontology.org/amigo/term/GO:0061061	FOS FOXL2
0.108069120926297	1	57	19.3093259464451	Outflow tract morphogenesis	http://amigo.geneontology.org/amigo/term/GO:0003151	JUN
0.108433690105394	2	404	5.44867118290776	Positive regulation of locomotion	http://amigo.geneontology.org/amigo/term/GO:0040017	GPNMB JUN
0.108433690105394	1	58	18.9764065335753	Negative regulation of lymphocyte proliferation	http://amigo.geneontology.org/amigo/term/GO:0050672	GPNMB
0.108433690105394	1	58	18.9764065335753	Intrinsic apoptotic signaling pathway by p53 class mediator	http://amigo.geneontology.org/amigo/term/GO:0072332	DDIT4
0.109605243888455	1	59	18.6547725245317	Negative regulation of mononuclear cell proliferation	http://amigo.geneontology.org/amigo/term/GO:0032945	GPNMB
0.109605243888455	2	409	5.38206151074508	Leukocyte differentiation	http://amigo.geneontology.org/amigo/term/GO:0002521	FOS JUN
0.109605243888455	1	59	18.6547725245317	Execution phase of apoptosis	http://amigo.geneontology.org/amigo/term/GO:0097194	FOXL2
0.110234509343271	1	60	18.3438596491228	Endoderm development	http://amigo.geneontology.org/amigo/term/GO:0007492	DUSP1
0.110234509343271	1	60	18.3438596491228	Extrinsic apoptotic signaling pathway via death domain receptors	http://amigo.geneontology.org/amigo/term/GO:0008625	HMGB2
0.110234509343271	1	60	18.3438596491228	Biological process involved in interaction with symbiont	http://amigo.geneontology.org/amigo/term/GO:0051702	JUN
0.111258061666114	2	415	5.30424857324033	Gamete generation	http://amigo.geneontology.org/amigo/term/GO:0007276	HMGB2 CEP57
0.111413351132642	1	61	18.0431406384815	Negative regulation of leukocyte proliferation	http://amigo.geneontology.org/amigo/term/GO:0070664	GPNMB
0.112122699596815	2	419	5.25361135535737	Response to hormone	http://amigo.geneontology.org/amigo/term/GO:0009725	DDIT4 HMGB2
0.112122699596815	2	420	5.24110275689223	Response to lipid	http://amigo.geneontology.org/amigo/term/GO:0033993	DDIT4 HMGB2
0.112122699596815	1	62	17.7521222410866	Positive regulation of JNK cascade	http://amigo.geneontology.org/amigo/term/GO:0046330	GADD45A
0.112122699596815	1	62	17.7521222410866	Modulation of process of other organism involved in symbiotic interaction	http://amigo.geneontology.org/amigo/term/GO:0051817	JUN
0.112515244866697	1	63	17.4703425229741	Lens development in camera-type eye	http://amigo.geneontology.org/amigo/term/GO:0002088	MAF
0.112515244866697	1	63	17.4703425229741	Regulation of receptor signaling pathway via JAK-STAT	http://amigo.geneontology.org/amigo/term/GO:0046425	GADD45A
0.112515244866697	1	63	17.4703425229741	Regulation of smooth muscle cell proliferation	http://amigo.geneontology.org/amigo/term/GO:0048660	JUN
0.112515244866697	1	63	17.4703425229741	Response to ketone	http://amigo.geneontology.org/amigo/term/GO:1901654	DDIT4
0.113046519124002	1	64	17.1973684210526	Glycolytic process	http://amigo.geneontology.org/amigo/term/GO:0006096	DDIT4
0.113046519124002	1	64	17.1973684210526	ATP generation from ADP	http://amigo.geneontology.org/amigo/term/GO:0006757	DDIT4
0.113046519124002	1	64	17.1973684210526	Liver development	http://amigo.geneontology.org/amigo/term/GO:0001889	JUN
0.113046519124002	1	64	17.1973684210526	Defense response to Gram-positive bacterium	http://amigo.geneontology.org/amigo/term/GO:0050830	HMGB2
0.113777762308146	1	65	16.9327935222672	Regulation of receptor signaling pathway via STAT	http://amigo.geneontology.org/amigo/term/GO:1904892	GADD45A
0.113777762308146	1	66	16.6762360446571	Negative regulation of extrinsic apoptotic signaling pathway	http://amigo.geneontology.org/amigo/term/GO:2001237	HMGB2
0.113777762308146	1	66	16.6762360446571	Female gonad development	http://amigo.geneontology.org/amigo/term/GO:0008585	FOXL2
0.113777762308146	1	66	16.6762360446571	Regulation of G2/M transition of mitotic cell cycle	http://amigo.geneontology.org/amigo/term/GO:0010389	CENPF
0.113777762308146	2	432	5.09551656920078	Epithelial cell differentiation	http://amigo.geneontology.org/amigo/term/GO:0030855	JUN MAF
0.113777762308146	1	65	16.9327935222672	Smooth muscle cell proliferation	http://amigo.geneontology.org/amigo/term/GO:0048659	JUN
0.113777762308146	1	66	16.6762360446571	MRNA transport	http://amigo.geneontology.org/amigo/term/GO:0051028	KIF5C
0.113777762308146	1	66	16.6762360446571	Negative regulation of small molecule metabolic process	http://amigo.geneontology.org/amigo/term/GO:0062014	DDIT4
0.113777762308146	2	433	5.08374863255136	Apoptotic signaling pathway	http://amigo.geneontology.org/amigo/term/GO:0097190	DDIT4 HMGB2
0.114606394138986	1	67	16.4273369992145	Fibroblast growth factor receptor signaling pathway	http://amigo.geneontology.org/amigo/term/GO:0008543	CEP57
0.114606394138986	2	438	5.02571497236241	Response to organic cyclic compound	http://amigo.geneontology.org/amigo/term/GO:0014070	DDIT4 HMGB2
0.114606394138986	1	67	16.4273369992145	Hepaticobiliary system development	http://amigo.geneontology.org/amigo/term/GO:0061008	JUN
0.115635284396301	1	68	16.1857585139319	Regulation of type I interferon production	http://amigo.geneontology.org/amigo/term/GO:0032479	HMGB2
0.115635284396301	1	68	16.1857585139319	Type I interferon production	http://amigo.geneontology.org/amigo/term/GO:0032606	HMGB2
0.116397154407042	1	69	15.951182303585	Response to chemokine	http://amigo.geneontology.org/amigo/term/GO:1990868	DUSP1
0.116397154407042	1	69	15.951182303585	Cellular response to chemokine	http://amigo.geneontology.org/amigo/term/GO:1990869	DUSP1
0.116397154407042	1	69	15.951182303585	Development of primary female sexual characteristics	http://amigo.geneontology.org/amigo/term/GO:0046545	FOXL2
0.117464718812293	2	448	4.91353383458647	Regulation of protein kinase activity	http://amigo.geneontology.org/amigo/term/GO:0045859	DUSP1 GADD45A
0.117606854144471	4	1689	2.60658751674924	Regulation of catalytic activity	http://amigo.geneontology.org/amigo/term/GO:0050790	DUSP1 HMGB2 FOXL2 GADD45A
0.118768937215373	1	71	15.5018532246108	ADP metabolic process	http://amigo.geneontology.org/amigo/term/GO:0046031	DDIT4
0.118885963815737	2	453	4.85930056930405	Regulation of cellular response to stress	http://amigo.geneontology.org/amigo/term/GO:0080135	DUSP1 GADD45A
0.119491873852356	1	72	15.2865497076023	Regulation of cell cycle G2/M phase transition	http://amigo.geneontology.org/amigo/term/GO:1902749	CENPF
0.119491873852356	1	72	15.2865497076023	Regulation of blood vessel endothelial cell migration	http://amigo.geneontology.org/amigo/term/GO:0043535	GADD45A
0.121249155044617	3	1033	3.196413104397	Regulation of cell differentiation	http://amigo.geneontology.org/amigo/term/GO:0045595	HMGB2 FOS MAF
0.121388697522779	2	461	4.77497431213609	Regulation of cell cycle process	http://amigo.geneontology.org/amigo/term/GO:0010564	GPNMB CENPF
0.122483246402593	1	75	14.6750877192982	Osteoclast differentiation	http://amigo.geneontology.org/amigo/term/GO:0030316	FOS
0.122483246402593	1	75	14.6750877192982	Positive regulation of innate immune response	http://amigo.geneontology.org/amigo/term/GO:0045089	HMGB2
0.122483246402593	3	1041	3.17184893068406	Generation of neurons	http://amigo.geneontology.org/amigo/term/GO:0048699	HMGB2 KIF5C JUN
0.122483246402593	1	75	14.6750877192982	Cytoskeleton-dependent cytokinesis	http://amigo.geneontology.org/amigo/term/GO:0061640	NUSAP1
0.122559406217885	3	1044	3.16273442226255	Biological process involved in interspecies interaction between organisms	http://amigo.geneontology.org/amigo/term/GO:0044419	DDIT4 HMGB2 JUN
0.123458193999715	1	76	14.4819944598338	Regulation of G1/S transition of mitotic cell cycle	http://amigo.geneontology.org/amigo/term/GO:2000045	GPNMB
0.123821250247129	1	77	14.2939166097061	Purine nucleoside diphosphate metabolic process	http://amigo.geneontology.org/amigo/term/GO:0009135	DDIT4
0.123821250247129	1	77	14.2939166097061	Purine ribonucleoside diphosphate metabolic process	http://amigo.geneontology.org/amigo/term/GO:0009179	DDIT4
0.123821250247129	1	77	14.2939166097061	Regeneration	http://amigo.geneontology.org/amigo/term/GO:0031099	JUN
0.123821250247129	1	77	14.2939166097061	Regulation of myeloid leukocyte differentiation	http://amigo.geneontology.org/amigo/term/GO:0002761	FOS
0.126318761319587	1	79	13.9320453031312	Ribonucleoside diphosphate metabolic process	http://amigo.geneontology.org/amigo/term/GO:0009185	DDIT4
0.126318761319587	2	479	4.59553895176354	Multicellular organismal reproductive process	http://amigo.geneontology.org/amigo/term/GO:0048609	HMGB2 CEP57
0.126645415859458	1	80	13.7578947368421	Antigen processing and presentation	http://amigo.geneontology.org/amigo/term/GO:0019882	MHCX1
0.126645415859458	1	80	13.7578947368421	Cellular response to fibroblast growth factor stimulus	http://amigo.geneontology.org/amigo/term/GO:0044344	CEP57
0.126645415859458	1	80	13.7578947368421	Negative regulation of T cell activation	http://amigo.geneontology.org/amigo/term/GO:0050868	GPNMB
0.126645415859458	1	80	13.7578947368421	Response to fibroblast growth factor	http://amigo.geneontology.org/amigo/term/GO:0071774	CEP57
0.126964597838279	1	81	13.5880441845354	Regulation of reactive oxygen species metabolic process	http://amigo.geneontology.org/amigo/term/GO:2000377	GADD45A
0.126964597838279	1	81	13.5880441845354	Positive regulation of stress-activated MAPK cascade	http://amigo.geneontology.org/amigo/term/GO:0032874	GADD45A
0.126964597838279	1	81	13.5880441845354	Modulation of process of other organism	http://amigo.geneontology.org/amigo/term/GO:0035821	JUN
0.126964597838279	1	81	13.5880441845354	Female sex differentiation	http://amigo.geneontology.org/amigo/term/GO:0046660	FOXL2
0.128174940304372	1	82	13.4223363286264	Intrinsic apoptotic signaling pathway in response to DNA damage	http://amigo.geneontology.org/amigo/term/GO:0008630	DDIT4
0.128992015488433	2	492	4.47411210954215	Multicellular organism reproduction	http://amigo.geneontology.org/amigo/term/GO:0032504	HMGB2 CEP57
0.129075305741085	1	83	13.2606214331008	Positive regulation of stress-activated protein kinase signaling cascade	http://amigo.geneontology.org/amigo/term/GO:0070304	GADD45A
0.129965985319413	1	84	13.1027568922306	Nucleoside diphosphate phosphorylation	http://amigo.geneontology.org/amigo/term/GO:0006165	DDIT4
0.129965985319413	1	84	13.1027568922306	Pyruvate metabolic process	http://amigo.geneontology.org/amigo/term/GO:0006090	DDIT4
0.130816487543656	2	500	4.40252631578947	Regulation of cytokine production	http://amigo.geneontology.org/amigo/term/GO:0001817	GPNMB HMGB2
0.130816487543656	1	85	12.9486068111455	Nucleotide phosphorylation	http://amigo.geneontology.org/amigo/term/GO:0046939	DDIT4
0.130816487543656	2	500	4.40252631578947	Positive regulation of hydrolase activity	http://amigo.geneontology.org/amigo/term/GO:0051345	HMGB2 FOXL2
0.131718827936072	1	86	12.7980416156671	Positive regulation of cysteine-type endopeptidase activity involved in apoptotic process	http://amigo.geneontology.org/amigo/term/GO:0043280	FOXL2
0.132581255271198	1	87	12.6509376890502	Regulation of TOR signaling	http://amigo.geneontology.org/amigo/term/GO:0032006	DDIT4
0.132581255271198	1	87	12.6509376890502	Regulation of mononuclear cell migration	http://amigo.geneontology.org/amigo/term/GO:0071675	DUSP1
0.132778965923574	2	507	4.34174192878646	Cytokine production	http://amigo.geneontology.org/amigo/term/GO:0001816	GPNMB HMGB2
0.13312988042012	1	88	12.5071770334928	Negative regulation of leukocyte cell-cell adhesion	http://amigo.geneontology.org/amigo/term/GO:1903038	GPNMB
0.13312988042012	1	88	12.5071770334928	Male gonad development	http://amigo.geneontology.org/amigo/term/GO:0008584	HMGB2
0.133367370339477	1	89	12.3666469544648	Regulation of cell cycle G1/S phase transition	http://amigo.geneontology.org/amigo/term/GO:1902806	GPNMB
0.133367370339477	1	89	12.3666469544648	Chondrocyte differentiation	http://amigo.geneontology.org/amigo/term/GO:0002062	MAF
0.133367370339477	1	89	12.3666469544648	Regulation of JNK cascade	http://amigo.geneontology.org/amigo/term/GO:0046328	GADD45A
0.133367370339477	1	89	12.3666469544648	Development of primary male sexual characteristics	http://amigo.geneontology.org/amigo/term/GO:0046546	HMGB2
0.133521184530748	3	1119	2.95075490334415	Negative regulation of response to stimulus	http://amigo.geneontology.org/amigo/term/GO:0048585	DDIT4 DUSP1 HMGB2
0.134201163719234	1	90	12.2292397660819	Blood vessel endothelial cell migration	http://amigo.geneontology.org/amigo/term/GO:0043534	GADD45A
0.134857032176065	2	519	4.24135483216712	Regulation of cell adhesion	http://amigo.geneontology.org/amigo/term/GO:0030155	GPNMB DUSP1
0.134857032176065	1	91	12.0948525159051	Regulation of generation of precursor metabolites and energy	http://amigo.geneontology.org/amigo/term/GO:0043467	DDIT4
0.134857032176065	1	91	12.0948525159051	Negative regulation of neuron apoptotic process	http://amigo.geneontology.org/amigo/term/GO:0043524	JUN
0.135540185521149	1	92	11.9633867276888	G2/M transition of mitotic cell cycle	http://amigo.geneontology.org/amigo/term/GO:0000086	CENPF
0.135540185521149	1	92	11.9633867276888	Spindle assembly	http://amigo.geneontology.org/amigo/term/GO:0051225	KIFC1
0.136204806030026	3	1136	2.90659747961453	Neurogenesis	http://amigo.geneontology.org/amigo/term/GO:0022008	HMGB2 KIF5C JUN
0.136347742359535	1	93	11.8347481607244	Mitotic spindle organization	http://amigo.geneontology.org/amigo/term/GO:0007052	KIFC1
0.136481408911212	2	526	4.18491094656794	Sexual reproduction	http://amigo.geneontology.org/amigo/term/GO:0019953	HMGB2 CEP57
0.138415356374243	2	531	4.14550500545148	Regulation of kinase activity	http://amigo.geneontology.org/amigo/term/GO:0043549	DUSP1 GADD45A
0.139330557165741	1	96	11.4649122807018	Nucleus organization	http://amigo.geneontology.org/amigo/term/GO:0006997	HMGB2
0.139330557165741	1	96	11.4649122807018	Formation of primary germ layer	http://amigo.geneontology.org/amigo/term/GO:0001704	DUSP1
0.139736949328403	2	536	4.10683424980361	Negative regulation of catalytic activity	http://amigo.geneontology.org/amigo/term/GO:0043086	DUSP1 GADD45A
0.139800213180619	1	97	11.3467173087358	Positive regulation of cysteine-type endopeptidase activity	http://amigo.geneontology.org/amigo/term/GO:2001056	FOXL2
0.139800213180619	1	97	11.3467173087358	Regulation of leukocyte chemotaxis	http://amigo.geneontology.org/amigo/term/GO:0002688	DUSP1
0.1402625689543	1	98	11.2309344790548	DNA-templated transcription, initiation	http://amigo.geneontology.org/amigo/term/GO:0006352	JUN
0.1402625689543	1	98	11.2309344790548	Cell-cell junction assembly	http://amigo.geneontology.org/amigo/term/GO:0007043	PARD6B
0.1402625689543	1	98	11.2309344790548	Response to ionizing radiation	http://amigo.geneontology.org/amigo/term/GO:0010212	GADD45A
0.141326934872711	1	99	11.1174906964381	Regulation of cellular carbohydrate metabolic process	http://amigo.geneontology.org/amigo/term/GO:0010675	DDIT4
0.141773111727557	1	100	11.0063157894737	Nucleoside diphosphate metabolic process	http://amigo.geneontology.org/amigo/term/GO:0009132	DDIT4
0.141773111727557	1	100	11.0063157894737	Nucleic acid transport	http://amigo.geneontology.org/amigo/term/GO:0050657	KIF5C
0.141773111727557	1	100	11.0063157894737	RNA transport	http://amigo.geneontology.org/amigo/term/GO:0050658	KIF5C
0.141909176675407	1	101	10.8973423658155	JNK cascade	http://amigo.geneontology.org/amigo/term/GO:0007254	GADD45A
0.141909176675407	1	101	10.8973423658155	Peptidyl-tyrosine dephosphorylation	http://amigo.geneontology.org/amigo/term/GO:0035335	DUSP1
0.141909176675407	1	101	10.8973423658155	Cell cycle G2/M phase transition	http://amigo.geneontology.org/amigo/term/GO:0044839	CENPF
0.141909176675407	1	101	10.8973423658155	Establishment of RNA localization	http://amigo.geneontology.org/amigo/term/GO:0051236	KIF5C
0.142342722626424	1	102	10.7905056759546	Carbohydrate catabolic process	http://amigo.geneontology.org/amigo/term/GO:0016052	DDIT4
0.142342722626424	1	102	10.7905056759546	TOR signaling	http://amigo.geneontology.org/amigo/term/GO:0031929	DDIT4
0.142342722626424	4	1907	2.3086136946982	Intracellular signal transduction	http://amigo.geneontology.org/amigo/term/GO:0035556	DDIT4 DUSP1 JUN GADD45A
0.143373321471061	1	103	10.6857434849259	Erythrocyte differentiation	http://amigo.geneontology.org/amigo/term/GO:0030218	HMGB2
0.145724850340104	1	105	10.4822055137845	Negative regulation of lymphocyte activation	http://amigo.geneontology.org/amigo/term/GO:0051250	GPNMB
0.146740551537506	1	106	10.3833167825223	Positive regulation of response to biotic stimulus	http://amigo.geneontology.org/amigo/term/GO:0002833	HMGB2
0.147441093157978	1	107	10.2862764387605	Transport along microtubule	http://amigo.geneontology.org/amigo/term/GO:0010970	KIF5C
0.147441093157978	1	107	10.2862764387605	Male sex differentiation	http://amigo.geneontology.org/amigo/term/GO:0046661	HMGB2
0.148037669727916	1	109	10.0975374215355	Negative regulation of mitotic cell cycle phase transition	http://amigo.geneontology.org/amigo/term/GO:1901991	GPNMB
0.148037669727916	1	111	9.91559981033665	Positive regulation of leukocyte differentiation	http://amigo.geneontology.org/amigo/term/GO:1902107	FOS
0.148037669727916	1	111	9.91559981033665	Positive regulation of hemopoiesis	http://amigo.geneontology.org/amigo/term/GO:1903708	FOS
0.148037669727916	1	110	10.0057416267943	Receptor signaling pathway via JAK-STAT	http://amigo.geneontology.org/amigo/term/GO:0007259	GADD45A
0.148037669727916	1	111	9.91559981033665	Positive regulation of endopeptidase activity	http://amigo.geneontology.org/amigo/term/GO:0010950	FOXL2
0.148037669727916	1	109	10.0975374215355	Muscle cell proliferation	http://amigo.geneontology.org/amigo/term/GO:0033002	JUN
0.148037669727916	1	110	10.0057416267943	Regulation of peptidyl-serine phosphorylation	http://amigo.geneontology.org/amigo/term/GO:0033135	GADD45A
0.148037669727916	1	109	10.0975374215355	Erythrocyte homeostasis	http://amigo.geneontology.org/amigo/term/GO:0034101	HMGB2
0.148037669727916	2	576	3.82163742690058	Negative regulation of apoptotic process	http://amigo.geneontology.org/amigo/term/GO:0043066	HMGB2 JUN
0.148037669727916	1	110	10.0057416267943	Regulation of MAP kinase activity	http://amigo.geneontology.org/amigo/term/GO:0043405	DUSP1
0.148037669727916	1	108	10.1910331384016	Negative regulation of MAPK cascade	http://amigo.geneontology.org/amigo/term/GO:0043409	DUSP1
0.148037669727916	1	111	9.91559981033665	Regulation of neuron apoptotic process	http://amigo.geneontology.org/amigo/term/GO:0043523	JUN
0.148037669727916	2	570	3.86186518928901	Positive regulation of cell differentiation	http://amigo.geneontology.org/amigo/term/GO:0045597	HMGB2 FOS
0.148037669727916	1	111	9.91559981033665	Establishment of vesicle localization	http://amigo.geneontology.org/amigo/term/GO:0051650	KIF5C
0.148037669727916	1	109	10.0975374215355	Signal transduction by p53 class mediator	http://amigo.geneontology.org/amigo/term/GO:0072331	DDIT4
0.148703364981917	1	112	9.82706766917293	Regulation of extrinsic apoptotic signaling pathway	http://amigo.geneontology.org/amigo/term/GO:2001236	HMGB2
0.148703364981917	1	112	9.82706766917293	Receptor signaling pathway via STAT	http://amigo.geneontology.org/amigo/term/GO:0097696	GADD45A
0.1487611013396	4	1971	2.23365109882774	Anatomical structure morphogenesis	http://amigo.geneontology.org/amigo/term/GO:0009653	DUSP1 KIF5C JUN FOXL2
0.150620358713026	1	114	9.65466297322253	Centrosome cycle	http://amigo.geneontology.org/amigo/term/GO:0007098	PARD6B
0.151571439901471	1	115	9.57070938215103	Negative regulation of binding	http://amigo.geneontology.org/amigo/term/GO:0051100	JUN
0.152224811168702	1	116	9.48820326678766	Positive regulation of epithelial cell migration	http://amigo.geneontology.org/amigo/term/GO:0010634	JUN
0.152224811168702	2	595	3.69960194604157	Negative regulation of programmed cell death	http://amigo.geneontology.org/amigo/term/GO:0043069	HMGB2 JUN
0.152224811168702	2	595	3.69960194604157	Multi-organism reproductive process	http://amigo.geneontology.org/amigo/term/GO:0044703	HMGB2 CEP57
0.15284631348232	1	117	9.40710751237067	Cellular response to steroid hormone stimulus	http://amigo.geneontology.org/amigo/term/GO:0071383	DDIT4
0.15317002708443	1	118	9.32738626226583	RNA localization	http://amigo.geneontology.org/amigo/term/GO:0006403	KIF5C
0.15317002708443	1	118	9.32738626226583	Regulation of T cell proliferation	http://amigo.geneontology.org/amigo/term/GO:0042129	GPNMB
0.15317002708443	1	118	9.32738626226583	Cellular response to radiation	http://amigo.geneontology.org/amigo/term/GO:0071478	GADD45A
0.153234715892696	3	1256	2.62889708347301	Immune response	http://amigo.geneontology.org/amigo/term/GO:0006955	DDIT4 HMGB2 MHCX1
0.154413160659391	1	121	9.09612875163114	Regulation of carbohydrate metabolic process	http://amigo.geneontology.org/amigo/term/GO:0006109	DDIT4
0.154413160659391	2	606	3.63244745527184	Positive regulation of cell population proliferation	http://amigo.geneontology.org/amigo/term/GO:0008284	HMGB2 JUN
0.154413160659391	1	120	9.1719298245614	G1/S transition of mitotic cell cycle	http://amigo.geneontology.org/amigo/term/GO:0000082	GPNMB
0.154413160659391	1	120	9.1719298245614	Microtubule organizing center organization	http://amigo.geneontology.org/amigo/term/GO:0031023	PARD6B
0.154413160659391	2	608	3.62049861495845	Regulation of transferase activity	http://amigo.geneontology.org/amigo/term/GO:0051338	DUSP1 GADD45A
0.154413160659391	1	121	9.09612875163114	Vesicle localization	http://amigo.geneontology.org/amigo/term/GO:0051648	KIF5C
0.154413160659391	2	607	3.62646319257782	Multi-organism process	http://amigo.geneontology.org/amigo/term/GO:0051704	HMGB2 CEP57
0.155319841842557	1	122	9.02157031924073	Tissue remodeling	http://amigo.geneontology.org/amigo/term/GO:0048771	GPNMB
0.155918607910798	1	123	8.9482242190843	Positive regulation of peptidase activity	http://amigo.geneontology.org/amigo/term/GO:0010952	FOXL2
0.155918607910798	1	123	8.9482242190843	Signal transduction in response to DNA damage	http://amigo.geneontology.org/amigo/term/GO:0042770	GADD45A
0.15745261434403	2	620	3.55042444821732	Regulation of response to external stimulus	http://amigo.geneontology.org/amigo/term/GO:0032101	DUSP1 HMGB2
0.15745261434403	1	125	8.80505263157895	Regulation of innate immune response	http://amigo.geneontology.org/amigo/term/GO:0045088	HMGB2
0.15745261434403	1	125	8.80505263157895	Cellular response to lipopolysaccharide	http://amigo.geneontology.org/amigo/term/GO:0071222	HMGB2
0.157814845078906	1	126	8.73517126148705	Negative regulation of cell-cell adhesion	http://amigo.geneontology.org/amigo/term/GO:0022408	GPNMB
0.157814845078906	2	623	3.53332770127566	Leukocyte activation	http://amigo.geneontology.org/amigo/term/GO:0045321	GPNMB JUN
0.157814845078906	1	126	8.73517126148705	Negative regulation of leukocyte activation	http://amigo.geneontology.org/amigo/term/GO:0002695	GPNMB
0.158492204702424	2	628	3.50519611129735	Positive regulation of intracellular signal transduction	http://amigo.geneontology.org/amigo/term/GO:1902533	JUN GADD45A
0.158492204702424	1	129	8.53202774377805	DNA packaging	http://amigo.geneontology.org/amigo/term/GO:0006323	NUSAP1
0.158492204702424	1	128	8.59868421052632	Cytokinesis	http://amigo.geneontology.org/amigo/term/GO:0000910	NUSAP1
0.158492204702424	2	628	3.50519611129735	Cellular response to DNA damage stimulus	http://amigo.geneontology.org/amigo/term/GO:0006974	DDIT4 GADD45A
0.158492204702424	1	129	8.53202774377805	Regulation of endothelial cell migration	http://amigo.geneontology.org/amigo/term/GO:0010594	GADD45A
0.158492204702424	3	1301	2.5379667462276	Protein-containing complex subunit organization	http://amigo.geneontology.org/amigo/term/GO:0043933	DDIT4 PARD6B CEP57
0.158492204702424	2	626	3.51639482091811	Positive regulation of immune system process	http://amigo.geneontology.org/amigo/term/GO:0002684	HMGB2 FOS
0.158492204702424	1	129	8.53202774377805	Cellular response to molecule of bacterial origin	http://amigo.geneontology.org/amigo/term/GO:0071219	HMGB2
0.158492204702424	1	128	8.59868421052632	Microtubule-based transport	http://amigo.geneontology.org/amigo/term/GO:0099111	KIF5C
0.160510092191033	1	131	8.40176777822419	Positive regulation of binding	http://amigo.geneontology.org/amigo/term/GO:0051099	HMGB2
0.161060141221807	1	132	8.33811802232855	Cytoskeleton-dependent intracellular transport	http://amigo.geneontology.org/amigo/term/GO:0030705	KIF5C
0.161060141221807	1	132	8.33811802232855	Cell cycle G1/S phase transition	http://amigo.geneontology.org/amigo/term/GO:0044843	GPNMB
0.161907714534454	1	133	8.27542540561931	Myeloid cell homeostasis	http://amigo.geneontology.org/amigo/term/GO:0002262	HMGB2
0.164511217833953	2	649	3.39177682264212	Neuron projection development	http://amigo.geneontology.org/amigo/term/GO:0031175	KIF5C JUN
0.165873255870105	1	137	8.03380714560123	Negative regulation of cell activation	http://amigo.geneontology.org/amigo/term/GO:0050866	GPNMB
0.166392334239499	1	138	7.97559115179252	Neuron apoptotic process	http://amigo.geneontology.org/amigo/term/GO:0051402	JUN
0.166392334239499	1	138	7.97559115179252	Mononuclear cell migration	http://amigo.geneontology.org/amigo/term/GO:0071674	DUSP1
0.167107752007407	1	140	7.86165413533834	Response to hypoxia	http://amigo.geneontology.org/amigo/term/GO:0001666	DDIT4
0.167107752007407	1	140	7.86165413533834	Myeloid leukocyte activation	http://amigo.geneontology.org/amigo/term/GO:0002274	JUN
0.167107752007407	1	140	7.86165413533834	Regulation of cysteine-type endopeptidase activity involved in apoptotic process	http://amigo.geneontology.org/amigo/term/GO:0043281	FOXL2
0.167107752007407	2	661	3.33020144915996	Chromosome organization	http://amigo.geneontology.org/amigo/term/GO:0051276	NUSAP1 KIFC1
0.167107752007407	1	139	7.91821279818251	Positive regulation of ERK1 and ERK2 cascade	http://amigo.geneontology.org/amigo/term/GO:0070374	JUN
0.16792083281417	1	141	7.80589772303098	Response to decreased oxygen levels	http://amigo.geneontology.org/amigo/term/GO:0036293	DDIT4
0.168729960806546	1	142	7.75092661230541	T cell proliferation	http://amigo.geneontology.org/amigo/term/GO:0042098	GPNMB
0.168916417040621	2	669	3.29037841239871	Negative regulation of gene expression	http://amigo.geneontology.org/amigo/term/GO:0010629	GPNMB HMGB2
0.168916417040621	1	143	7.69672432830327	Cell-cell junction organization	http://amigo.geneontology.org/amigo/term/GO:0045216	PARD6B
0.168916417040621	2	668	3.29530412858493	Negative regulation of multicellular organismal process	http://amigo.geneontology.org/amigo/term/GO:0051241	GPNMB GADD45A
0.169407340325302	1	144	7.64327485380117	Gastrulation	http://amigo.geneontology.org/amigo/term/GO:0007369	DUSP1
0.169407340325302	1	144	7.64327485380117	Protein homooligomerization	http://amigo.geneontology.org/amigo/term/GO:0051260	CEP57
0.17130333650121	1	146	7.53857245854362	Positive regulation of defense response	http://amigo.geneontology.org/amigo/term/GO:0031349	HMGB2
0.173188651790035	1	148	7.43669985775249	Cellular response to biotic stimulus	http://amigo.geneontology.org/amigo/term/GO:0071216	HMGB2
0.174391131666985	2	686	3.20883842258708	Defense response to other organism	http://amigo.geneontology.org/amigo/term/GO:0098542	DDIT4 HMGB2
0.175837896481335	1	151	7.28895085395608	Regulation of lymphocyte proliferation	http://amigo.geneontology.org/amigo/term/GO:0050670	GPNMB
0.176740049170003	1	153	7.19367045063639	Regulation of mononuclear cell proliferation	http://amigo.geneontology.org/amigo/term/GO:0032944	GPNMB
0.176740049170003	1	153	7.19367045063639	Negative regulation of mitotic cell cycle	http://amigo.geneontology.org/amigo/term/GO:0045930	GPNMB
0.176740049170003	1	153	7.19367045063639	Inner ear development	http://amigo.geneontology.org/amigo/term/GO:0048839	MAF
0.176740049170003	1	153	7.19367045063639	Response to oxygen levels	http://amigo.geneontology.org/amigo/term/GO:0070482	DDIT4
0.17750185899846	1	154	7.14695830485304	Cartilage development	http://amigo.geneontology.org/amigo/term/GO:0051216	MAF
0.177581646428888	2	699	3.14916045478503	Cell activation	http://amigo.geneontology.org/amigo/term/GO:0001775	GPNMB JUN
0.179014537448228	1	156	7.055330634278	Regulation of leukocyte migration	http://amigo.geneontology.org/amigo/term/GO:0002685	DUSP1
0.179446147334046	1	157	7.0103922225947	Regulation of cysteine-type endopeptidase activity	http://amigo.geneontology.org/amigo/term/GO:2000116	FOXL2
0.179446147334046	1	157	7.0103922225947	Myeloid leukocyte migration	http://amigo.geneontology.org/amigo/term/GO:0097529	DUSP1
0.183466486769777	1	162	6.79402209226771	Negative regulation of cell cycle phase transition	http://amigo.geneontology.org/amigo/term/GO:1901988	GPNMB
0.183466486769777	1	162	6.79402209226771	Negative regulation of apoptotic signaling pathway	http://amigo.geneontology.org/amigo/term/GO:2001234	HMGB2
0.183466486769777	1	162	6.79402209226771	Endothelial cell migration	http://amigo.geneontology.org/amigo/term/GO:0043542	GADD45A
0.183466486769777	1	162	6.79402209226771	Regulation of leukocyte proliferation	http://amigo.geneontology.org/amigo/term/GO:0070663	GPNMB
0.18419613091856	1	163	6.75234097513723	Nucleobase-containing compound transport	http://amigo.geneontology.org/amigo/term/GO:0015931	KIF5C
0.186691236872062	1	166	6.63031071655041	Regulation of chemotaxis	http://amigo.geneontology.org/amigo/term/GO:0050920	DUSP1
0.186691236872062	1	166	6.63031071655041	Extrinsic apoptotic signaling pathway	http://amigo.geneontology.org/amigo/term/GO:0097191	HMGB2
0.187407770880731	1	167	6.59060825716987	Establishment or maintenance of cell polarity	http://amigo.geneontology.org/amigo/term/GO:0007163	PARD6B
0.190278981929696	1	172	6.39902080783354	Axon guidance	http://amigo.geneontology.org/amigo/term/GO:0007411	KIF5C
0.190278981929696	1	171	6.43644198214835	Leukocyte chemotaxis	http://amigo.geneontology.org/amigo/term/GO:0030595	DUSP1
0.190278981929696	1	171	6.43644198214835	Protein-containing complex localization	http://amigo.geneontology.org/amigo/term/GO:0031503	KIF5C
0.190278981929696	1	171	6.43644198214835	Cellular response to extracellular stimulus	http://amigo.geneontology.org/amigo/term/GO:0031668	FOS
0.190278981929696	1	172	6.39902080783354	Biological process involved in symbiotic interaction	http://amigo.geneontology.org/amigo/term/GO:0044403	JUN
0.190278981929696	1	172	6.39902080783354	Defense response to virus	http://amigo.geneontology.org/amigo/term/GO:0051607	DDIT4
0.190278981929696	1	172	6.39902080783354	Defense response to symbiont	http://amigo.geneontology.org/amigo/term/GO:0140546	DDIT4
0.190644807092634	1	173	6.36203224825068	Response to lipopolysaccharide	http://amigo.geneontology.org/amigo/term/GO:0032496	HMGB2
0.190644807092634	1	173	6.36203224825068	Neuron projection guidance	http://amigo.geneontology.org/amigo/term/GO:0097485	KIF5C
0.19200216429107	1	175	6.28932330827068	Protein-containing complex disassembly	http://amigo.geneontology.org/amigo/term/GO:0032984	DDIT4
0.19200216429107	1	175	6.28932330827068	Ear development	http://amigo.geneontology.org/amigo/term/GO:0043583	MAF
0.19200216429107	2	752	2.92721164613662	Neuron development	http://amigo.geneontology.org/amigo/term/GO:0048666	KIF5C JUN
0.193390058261062	1	177	6.21825750817722	Negative regulation of cytokine production	http://amigo.geneontology.org/amigo/term/GO:0001818	GPNMB
0.195371609871373	3	1497	2.20567450690855	Positive regulation of response to stimulus	http://amigo.geneontology.org/amigo/term/GO:0048584	HMGB2 JUN GADD45A
0.19976148280059	1	184	5.98169336384439	Protein complex oligomerization	http://amigo.geneontology.org/amigo/term/GO:0051259	CEP57

## Sheet: GO, CP CC (UPREGULATED)
GO BIOLOGICAL PROCESSES FOR GENES UPREGULATED IN CUMULUS CELLS OF COMPACTED COC GROUP
Enrichment FDR	nGenes	Pathway Genes	Fold Enrichment	Pathway	URL	Genes
0.0356845344172121	1	44	59.4090909090909	Fatty acid degradation	http://www.genome.jp/kegg-bin/show_pathway?ecb00071	LOC100034175
0.0356845344172121	1	41	63.7560975609756	Tyrosine metabolism	http://www.genome.jp/kegg-bin/show_pathway?ecb00350	LOC100034175
0.0356845344172121	1	43	60.7906976744186	Pyruvate metabolism	http://www.genome.jp/kegg-bin/show_pathway?ecb00620	LOC100034175
0.0356845344172121	1	47	55.6170212765957	Drug metabolism	http://www.genome.jp/kegg-bin/show_pathway?ecb00982	LOC100034175
0.0362918025663742	1	62	42.1612903225806	Glycolysis / Gluconeogenesis	http://www.genome.jp/kegg-bin/show_pathway?ecb00010	LOC100034175
0.0362918025663742	1	72	36.3055555555556	Bacterial invasion of epithelial cells	http://www.genome.jp/kegg-bin/show_pathway?ecb05100	SEPTIN9
0.0593862166032431	1	139	18.8057553956835	Alcoholic liver disease	http://www.genome.jp/kegg-bin/show_pathway?ecb04936	LOC100034175
