# Supplementary material for: Follicular Fluid-Derived Extracellular Vesicles Influence on In Vitro Maturation of Equine Oocyte: Impact on Cumulus Cell Viability, Expansion and Transcriptome
Source: Int J Mol Sci. 2024 Mar 13;25(6):3262. doi: 10.3390/ijms25063262 (PMC10970002; doi:10.3390/ijms25063262)
Supplement: Supplementary file 1 [file ijms-25-03262-s001.zip › Table S7.xlsx]

## Sheet: KEGG, EX CC (DOWNREGULATED)
KEGG FOR GENES DOWNREGULATED IN CUMULUS CELLS OF EXPANDED COC GROUP
Enrichment FDR	nGenes	Pathway Genes	Fold Enrichment	Pathway	URL	Genes
0.0926597036338717	1	76	30.5730994152047	Inositol phosphate metabolism	http://www.genome.jp/kegg-bin/show_pathway?ecb00562	ITPKA
0.0926597036338717	1	67	34.6799336650083	Platinum drug resistance	http://www.genome.jp/kegg-bin/show_pathway?ecb01524	TOP2A
0.0926597036338717	1	98	23.7097505668934	Phosphatidylinositol signaling system	http://www.genome.jp/kegg-bin/show_pathway?ecb04070	ITPKA
0.0926597036338717	1	126	18.4409171075838	Cell cycle	http://www.genome.jp/kegg-bin/show_pathway?ecb04110	TTK
0.119709717508913	1	235	9.88747044917258	Calcium signaling pathway	http://www.genome.jp/kegg-bin/show_pathway?ecb04020	ITPKA
0.119709717508913	1	250	9.29422222222222	Endocytosis	http://www.genome.jp/kegg-bin/show_pathway?ecb04144	DAB2

## Sheet: KEGG, EX CC (UPREGULATED)
KEGG FOR GENES UPREGULATED IN CUMULUS CELLS OF EXPANDED COC GROUP
Enrichment FDR	nGenes	Pathway Genes	Fold Enrichment	Pathway	URL	Genes
0.0475429359192198	2	328	25.5024390243902	Human papillomavirus infection	http://www.genome.jp/kegg-bin/show_pathway?ecb05165	FZD5 LOC100064145
0.0534946507256927	1	126	33.1936507936508	Cell cycle	http://www.genome.jp/kegg-bin/show_pathway?ecb04110	CDKN1C
0.0534946507256927	1	153	27.3359477124183	MTOR signaling pathway	http://www.genome.jp/kegg-bin/show_pathway?ecb04150	FZD5
0.0534946507256927	1	157	26.6394904458599	Wnt signaling pathway	http://www.genome.jp/kegg-bin/show_pathway?ecb04310	FZD5
0.0534946507256927	1	152	27.5157894736842	Hippo signaling pathway	http://www.genome.jp/kegg-bin/show_pathway?ecb04390	FZD5
0.0534946507256927	1	87	48.0735632183908	ECM-receptor interaction	http://www.genome.jp/kegg-bin/show_pathway?ecb04512	LOC100064145
0.0534946507256927	1	140	29.8742857142857	Signaling pathways regulating pluripotency of stem cells	http://www.genome.jp/kegg-bin/show_pathway?ecb04550	FZD5
0.0534946507256927	1	98	42.6775510204082	Melanogenesis	http://www.genome.jp/kegg-bin/show_pathway?ecb04916	FZD5
0.0534946507256927	1	151	27.6980132450331	Cushing syndrome	http://www.genome.jp/kegg-bin/show_pathway?ecb04934	FZD5
0.0534946507256927	1	101	41.409900990099	Protein digestion and absorption	http://www.genome.jp/kegg-bin/show_pathway?ecb04974	LOC100064145
0.0534946507256927	1	61	68.5639344262295	Basal cell carcinoma	http://www.genome.jp/kegg-bin/show_pathway?ecb05217	FZD5
0.0534946507256927	1	144	29.0444444444444	Breast cancer	http://www.genome.jp/kegg-bin/show_pathway?ecb05224	FZD5
0.0534946507256927	1	159	26.3044025157233	Hepatocellular carcinoma	http://www.genome.jp/kegg-bin/show_pathway?ecb05225	FZD5
0.0534946507256927	1	144	29.0444444444444	Gastric cancer	http://www.genome.jp/kegg-bin/show_pathway?ecb05226	FZD5
0.0583596725901277	1	197	21.2304568527919	Focal adhesion	http://www.genome.jp/kegg-bin/show_pathway?ecb04510	LOC100064145
0.0583596725901277	1	199	21.0170854271357	Proteoglycans in cancer	http://www.genome.jp/kegg-bin/show_pathway?ecb05205	FZD5
0.0928511150487253	1	341	12.2651026392962	PI3K-Akt signaling pathway	http://www.genome.jp/kegg-bin/show_pathway?ecb04151	LOC100064145
0.0953815924551983	1	372	11.2430107526882	Alzheimer disease	http://www.genome.jp/kegg-bin/show_pathway?ecb05010	FZD5
0.109649043215505	1	455	9.19208791208791	Pathways of neurodegeneration	http://www.genome.jp/kegg-bin/show_pathway?ecb05022	FZD5
0.119174386398153	1	524	7.98167938931298	Pathways in cancer	http://www.genome.jp/kegg-bin/show_pathway?ecb05200	FZD5

## Sheet: GO, EX CC (DOWNREGULATED)
GO BIOLOGICAL PROCESSES FOR GENES DOWNREGULATED IN CUMULUS CELLS OF EXPANDED COC GROUP
Enrichment FDR	nGenes	Pathway Genes	Fold Enrichment	Pathway	URL	Genes
0.00961764964633339	2	22	211.232323232323	Female meiotic nuclear division	http://amigo.geneontology.org/amigo/term/GO:0007143	TOP2A TTK
0.00961764964633339	2	21	221.291005291005	Meiotic chromosome separation	http://amigo.geneontology.org/amigo/term/GO:0051307	TOP2A TTK
0.0112325323392026	3	197	35.3840947546531	Regulation of mitotic cell cycle phase transition	http://amigo.geneontology.org/amigo/term/GO:1901990	GPNMB TTK CENPF
0.0124993399129123	3	225	30.9807407407407	Nuclear chromosome segregation	http://amigo.geneontology.org/amigo/term/GO:0098813	TOP2A TTK CENPF
0.0133525316727073	3	263	26.5044359949303	Regulation of cell cycle phase transition	http://amigo.geneontology.org/amigo/term/GO:1901987	GPNMB TTK CENPF
0.0133525316727073	3	268	26.0099502487562	Chromosome segregation	http://amigo.geneontology.org/amigo/term/GO:0007059	TOP2A TTK CENPF
0.0133525316727073	3	278	25.0743405275779	Mitotic cell cycle phase transition	http://amigo.geneontology.org/amigo/term/GO:0044772	GPNMB TTK CENPF
0.0161765417020935	2	64	72.6111111111111	Negative regulation of chromosome organization	http://amigo.geneontology.org/amigo/term/GO:2001251	TOP2A TTK
0.0161765417020935	3	312	22.3418803418803	Regulation of mitotic cell cycle	http://amigo.geneontology.org/amigo/term/GO:0007346	GPNMB TTK CENPF
0.0161765417020935	4	861	10.7946831849271	Cell cycle process	http://amigo.geneontology.org/amigo/term/GO:0022402	GPNMB TOP2A TTK CENPF
0.0161765417020935	3	346	20.1464354527938	Cell cycle phase transition	http://amigo.geneontology.org/amigo/term/GO:0044770	GPNMB TTK CENPF
0.0190295813650495	2	75	61.9614814814815	Meiotic chromosome segregation	http://amigo.geneontology.org/amigo/term/GO:0045132	TOP2A TTK
0.0194853346063295	2	79	58.8241912798875	Chromosome separation	http://amigo.geneontology.org/amigo/term/GO:0051304	TOP2A TTK
0.0234621077628748	2	90	51.6345679012346	Female gamete generation	http://amigo.geneontology.org/amigo/term/GO:0007292	TOP2A TTK
0.0274253689212196	3	461	15.1207519884309	Regulation of cell cycle process	http://amigo.geneontology.org/amigo/term/GO:0010564	GPNMB TTK CENPF
0.0280813333492632	4	1139	8.15998439176666	Cell cycle	http://amigo.geneontology.org/amigo/term/GO:0007049	GPNMB TOP2A TTK CENPF
0.0282761773575128	2	109	42.6340468909276	Negative regulation of mitotic cell cycle phase transition	http://amigo.geneontology.org/amigo/term/GO:1901991	GPNMB TTK
0.0285061067574925	1	3	774.518518518518	Negative regulation of metaphase/anaphase transition of meiotic cell cycle	http://amigo.geneontology.org/amigo/term/GO:1902103	TTK
0.0285061067574925	3	510	13.6679738562091	Mitotic cell cycle process	http://amigo.geneontology.org/amigo/term/GO:1903047	GPNMB TTK CENPF
0.0285061067574925	1	3	774.518518518518	Negative regulation of meiotic chromosome separation	http://amigo.geneontology.org/amigo/term/GO:1905133	TTK
0.0285061067574925	1	3	774.518518518518	Negative regulation of DNA duplex unwinding	http://amigo.geneontology.org/amigo/term/GO:1905463	TOP2A
0.0285061067574925	1	3	774.518518518518	Positive regulation of clathrin-dependent endocytosis	http://amigo.geneontology.org/amigo/term/GO:2000370	DAB2
0.0285061067574925	1	3	774.518518518518	Apoptotic chromosome condensation	http://amigo.geneontology.org/amigo/term/GO:0030263	TOP2A
0.0289904706163736	2	162	28.6858710562414	Negative regulation of cell cycle phase transition	http://amigo.geneontology.org/amigo/term/GO:1901988	GPNMB TTK
0.0289904706163736	1	4	580.888888888889	Negative regulation of meiotic cell cycle phase transition	http://amigo.geneontology.org/amigo/term/GO:1901994	TTK
0.0289904706163736	1	4	580.888888888889	Regulation of metaphase/anaphase transition of meiotic cell cycle	http://amigo.geneontology.org/amigo/term/GO:1902102	TTK
0.0289904706163736	2	157	29.5994338287332	Meiotic cell cycle process	http://amigo.geneontology.org/amigo/term/GO:1903046	TOP2A TTK
0.0289904706163736	1	4	580.888888888889	Regulation of meiotic chromosome separation	http://amigo.geneontology.org/amigo/term/GO:1905132	TTK
0.0289904706163736	1	5	464.711111111111	Regulation of DNA duplex unwinding	http://amigo.geneontology.org/amigo/term/GO:1905462	TOP2A
0.0289904706163736	2	158	29.4120956399437	Sister chromatid segregation	http://amigo.geneontology.org/amigo/term/GO:0000819	TOP2A TTK
0.0289904706163736	1	4	580.888888888889	Female meiosis chromosome segregation	http://amigo.geneontology.org/amigo/term/GO:0016321	TTK
0.0289904706163736	3	654	10.6585117227319	Regulation of cell migration	http://amigo.geneontology.org/amigo/term/GO:0030334	GPNMB PTPRG DAB2
0.0289904706163736	2	149	31.1886651752424	Regulation of chromosome organization	http://amigo.geneontology.org/amigo/term/GO:0033044	TOP2A TTK
0.0289904706163736	3	625	11.1530666666667	Mitotic cell cycle	http://amigo.geneontology.org/amigo/term/GO:0000278	GPNMB TTK CENPF
0.0289904706163736	1	5	464.711111111111	Embryonic cleavage	http://amigo.geneontology.org/amigo/term/GO:0040016	TOP2A
0.0289904706163736	1	4	580.888888888889	Metaphase/anaphase transition of meiotic cell cycle	http://amigo.geneontology.org/amigo/term/GO:0044785	TTK
0.0289904706163736	2	153	30.3732752360203	Negative regulation of mitotic cell cycle	http://amigo.geneontology.org/amigo/term/GO:0045930	GPNMB TTK
0.0289904706163736	2	168	27.6613756613757	Protein autophosphorylation	http://amigo.geneontology.org/amigo/term/GO:0046777	GPNMB TTK
0.0289904706163736	2	142	32.7261345852895	Meiotic nuclear division	http://amigo.geneontology.org/amigo/term/GO:0140013	TOP2A TTK
0.0303837050723692	3	694	10.0441882804995	Regulation of cell motility	http://amigo.geneontology.org/amigo/term/GO:2000145	GPNMB PTPRG DAB2
0.0303837050723692	1	6	387.259259259259	Positive regulation of early endosome to late endosome transport	http://amigo.geneontology.org/amigo/term/GO:2000643	DAB2
0.0303837050723692	4	1500	6.19614814814815	Phosphorylation	http://amigo.geneontology.org/amigo/term/GO:0016310	GPNMB DAB2 ITPKA TTK
0.0303837050723692	2	176	26.4040404040404	Meiotic cell cycle	http://amigo.geneontology.org/amigo/term/GO:0051321	TOP2A TTK
0.0303837050723692	3	692	10.0732177263969	Regulation of cell cycle	http://amigo.geneontology.org/amigo/term/GO:0051726	GPNMB TTK CENPF
0.0311970949363247	1	7	331.936507936508	DNA topological change	http://amigo.geneontology.org/amigo/term/GO:0006265	TOP2A
0.0311970949363247	1	7	331.936507936508	Positive regulation of Wnt signaling pathway, planar cell polarity pathway	http://amigo.geneontology.org/amigo/term/GO:2000096	DAB2
0.0311970949363247	2	189	24.5878894767784	Negative regulation of cell cycle process	http://amigo.geneontology.org/amigo/term/GO:0010948	GPNMB TTK
0.0311970949363247	1	7	331.936507936508	Meiotic cell cycle checkpoint signaling	http://amigo.geneontology.org/amigo/term/GO:0033313	TTK
0.0311970949363247	3	727	9.58826226501605	Regulation of locomotion	http://amigo.geneontology.org/amigo/term/GO:0040012	GPNMB PTPRG DAB2
0.0320984668339193	3	740	9.41981981981982	Regulation of cellular component movement	http://amigo.geneontology.org/amigo/term/GO:0051270	GPNMB PTPRG DAB2
0.0342490822569709	1	8	290.444444444444	Positive regulation of cytoplasmic transport	http://amigo.geneontology.org/amigo/term/GO:1903651	DAB2
0.0370691564508132	1	9	258.172839506173	Regulation of meiotic cell cycle phase transition	http://amigo.geneontology.org/amigo/term/GO:1901993	TTK
0.0370691564508132	1	9	258.172839506173	Regulation of clathrin-dependent endocytosis	http://amigo.geneontology.org/amigo/term/GO:2000369	DAB2
0.0382902450909921	1	10	232.355555555556	DNA ligation	http://amigo.geneontology.org/amigo/term/GO:0006266	TOP2A
0.0382902450909921	1	10	232.355555555556	Regulation of early endosome to late endosome transport	http://amigo.geneontology.org/amigo/term/GO:2000641	DAB2
0.0382902450909921	1	10	232.355555555556	Meiotic cell cycle phase transition	http://amigo.geneontology.org/amigo/term/GO:0044771	TTK
0.0382902450909921	1	10	232.355555555556	Inositol metabolic process	http://amigo.geneontology.org/amigo/term/GO:0006020	ITPKA
0.0400056542987233	1	11	211.232323232323	Positive regulation of non-canonical Wnt signaling pathway	http://amigo.geneontology.org/amigo/term/GO:2000052	DAB2
0.0400056542987233	1	11	211.232323232323	Regulation of Wnt signaling pathway, planar cell polarity pathway	http://amigo.geneontology.org/amigo/term/GO:2000095	DAB2
0.0400056542987233	1	11	211.232323232323	Regulation of single stranded viral RNA replication via double stranded DNA intermediate	http://amigo.geneontology.org/amigo/term/GO:0045091	TOP2A
0.0409070497348585	2	256	18.1527777777778	Negative regulation of organelle organization	http://amigo.geneontology.org/amigo/term/GO:0010639	TOP2A TTK
0.0409070497348585	1	12	193.62962962963	Single stranded viral RNA replication via double stranded DNA intermediate	http://amigo.geneontology.org/amigo/term/GO:0039692	TOP2A
0.0409070497348585	2	256	18.1527777777778	Negative regulation of cell cycle	http://amigo.geneontology.org/amigo/term/GO:0045786	GPNMB TTK
0.0409070497348585	1	12	193.62962962963	Positive regulation of SMAD protein signal transduction	http://amigo.geneontology.org/amigo/term/GO:0060391	DAB2
0.0436258426681672	1	13	178.735042735043	Negative regulation of meiotic cell cycle	http://amigo.geneontology.org/amigo/term/GO:0051447	TTK
0.0449003684858035	1	14	165.968253968254	Resolution of meiotic recombination intermediates	http://amigo.geneontology.org/amigo/term/GO:0000712	TOP2A
0.0449003684858035	2	276	16.8373590982287	Cellular process involved in reproduction in multicellular organism	http://amigo.geneontology.org/amigo/term/GO:0022412	TOP2A TTK
0.0449003684858035	1	14	165.968253968254	Negative regulation of androgen receptor signaling pathway	http://amigo.geneontology.org/amigo/term/GO:0060766	DAB2
0.0498295116495045	1	16	145.222222222222	Regulation of cytoplasmic transport	http://amigo.geneontology.org/amigo/term/GO:1903649	DAB2
0.0498295116495045	1	16	145.222222222222	Positive regulation of protein autophosphorylation	http://amigo.geneontology.org/amigo/term/GO:0031954	GPNMB
0.0530077524521986	1	18	129.086419753086	Protein localization to condensed chromosome	http://amigo.geneontology.org/amigo/term/GO:1903083	TTK
0.0530077524521986	1	18	129.086419753086	Regulation of non-canonical Wnt signaling pathway	http://amigo.geneontology.org/amigo/term/GO:2000050	DAB2
0.0530077524521986	1	18	129.086419753086	Apoptotic nuclear changes	http://amigo.geneontology.org/amigo/term/GO:0030262	TOP2A
0.0530077524521986	1	18	129.086419753086	Protein localization to kinetochore	http://amigo.geneontology.org/amigo/term/GO:0034501	TTK
0.0537623746687667	1	19	122.292397660819	Negative regulation of protein localization to plasma membrane	http://amigo.geneontology.org/amigo/term/GO:1903077	DAB2
0.0537623746687667	1	19	122.292397660819	Cellular component disassembly involved in execution phase of apoptosis	http://amigo.geneontology.org/amigo/term/GO:0006921	TOP2A
0.0537623746687667	3	1035	6.73494363929146	Cell-cell signaling	http://amigo.geneontology.org/amigo/term/GO:0007267	GPNMB DAB2 ITPKA
0.0551199479028492	3	1051	6.63241357437361	Regulation of cell death	http://amigo.geneontology.org/amigo/term/GO:0010941	GPNMB TOP2A DAB2
0.0551487199751684	1	20	116.177777777778	Inositol phosphate biosynthetic process	http://amigo.geneontology.org/amigo/term/GO:0032958	ITPKA
0.0555537205365948	2	339	13.7082923631596	Nuclear division	http://amigo.geneontology.org/amigo/term/GO:0000280	TOP2A TTK
0.0563599015067715	1	21	110.645502645503	Negative regulation of protein localization to cell periphery	http://amigo.geneontology.org/amigo/term/GO:1904376	DAB2
0.0563599015067715	3	1084	6.43050430504305	Cell migration	http://amigo.geneontology.org/amigo/term/GO:0016477	GPNMB PTPRG DAB2
0.0563599015067715	1	22	105.616161616162	Positive regulation of viral genome replication	http://amigo.geneontology.org/amigo/term/GO:0045070	TOP2A
0.0563599015067715	1	22	105.616161616162	Regulation of androgen receptor signaling pathway	http://amigo.geneontology.org/amigo/term/GO:0060765	DAB2
0.0563599015067715	1	22	105.616161616162	Protein localization to chromosome, centromeric region	http://amigo.geneontology.org/amigo/term/GO:0071459	TTK
0.0575561885661838	1	23	101.024154589372	Viral RNA genome replication	http://amigo.geneontology.org/amigo/term/GO:0039694	TOP2A
0.0575561885661838	1	23	101.024154589372	Regulation of SMAD protein signal transduction	http://amigo.geneontology.org/amigo/term/GO:0060390	DAB2
0.0586191847336572	1	25	92.9422222222222	Positive regulation of cellular response to transforming growth factor beta stimulus	http://amigo.geneontology.org/amigo/term/GO:1903846	DAB2
0.0586191847336572	1	24	96.8148148148148	Negative regulation of protein localization to membrane	http://amigo.geneontology.org/amigo/term/GO:1905476	DAB2
0.0586191847336572	1	24	96.8148148148148	Ventricular system development	http://amigo.geneontology.org/amigo/term/GO:0021591	CENPF
0.0586191847336572	2	376	12.3593380614657	Positive regulation of cell migration	http://amigo.geneontology.org/amigo/term/GO:0030335	GPNMB DAB2
0.0586191847336572	1	25	92.9422222222222	Positive regulation of transforming growth factor beta receptor signaling pathway	http://amigo.geneontology.org/amigo/term/GO:0030511	DAB2
0.0586191847336572	2	377	12.3265546713823	Organelle fission	http://amigo.geneontology.org/amigo/term/GO:0048285	TOP2A TTK
0.0610072497556799	2	394	11.794698251551	Positive regulation of cell motility	http://amigo.geneontology.org/amigo/term/GO:2000147	GPNMB DAB2
0.0610072497556799	1	32	72.6111111111111	Negative regulation of mitotic sister chromatid separation	http://amigo.geneontology.org/amigo/term/GO:2000816	TTK
0.0610072497556799	1	29	80.1226053639847	Mitotic spindle assembly checkpoint signaling	http://amigo.geneontology.org/amigo/term/GO:0007094	TTK
0.0610072497556799	2	415	11.1978580990629	Gamete generation	http://amigo.geneontology.org/amigo/term/GO:0007276	TOP2A TTK
0.0610072497556799	1	30	77.4518518518518	Chromosome condensation	http://amigo.geneontology.org/amigo/term/GO:0030261	TOP2A
0.0610072497556799	1	30	77.4518518518518	Spindle checkpoint signaling	http://amigo.geneontology.org/amigo/term/GO:0031577	TTK
0.0610072497556799	1	31	74.9534050179211	Regulation of protein autophosphorylation	http://amigo.geneontology.org/amigo/term/GO:0031952	GPNMB
0.0610072497556799	1	32	72.6111111111111	Negative regulation of sister chromatid segregation	http://amigo.geneontology.org/amigo/term/GO:0033046	TTK
0.0610072497556799	1	32	72.6111111111111	Negative regulation of mitotic sister chromatid segregation	http://amigo.geneontology.org/amigo/term/GO:0033048	TTK
0.0610072497556799	1	29	80.1226053639847	Negative regulation of intracellular steroid hormone receptor signaling pathway	http://amigo.geneontology.org/amigo/term/GO:0033144	DAB2
0.0610072497556799	2	404	11.5027502750275	Positive regulation of locomotion	http://amigo.geneontology.org/amigo/term/GO:0040017	GPNMB DAB2
0.0610072497556799	1	29	80.1226053639847	Early endosome to late endosome transport	http://amigo.geneontology.org/amigo/term/GO:0045022	DAB2
0.0610072497556799	1	31	74.9534050179211	Negative regulation of mitotic metaphase/anaphase transition	http://amigo.geneontology.org/amigo/term/GO:0045841	TTK
0.0610072497556799	3	1215	5.73717421124829	Cell motility	http://amigo.geneontology.org/amigo/term/GO:0048870	GPNMB PTPRG DAB2
0.0610072497556799	2	399	11.6468950153161	Positive regulation of cellular component movement	http://amigo.geneontology.org/amigo/term/GO:0051272	GPNMB DAB2
0.0610072497556799	3	1215	5.73717421124829	Localization of cell	http://amigo.geneontology.org/amigo/term/GO:0051674	GPNMB PTPRG DAB2
0.0610072497556799	1	29	80.1226053639847	Wnt signaling pathway, planar cell polarity pathway	http://amigo.geneontology.org/amigo/term/GO:0060071	DAB2
0.0610072497556799	1	29	80.1226053639847	Spindle assembly checkpoint signaling	http://amigo.geneontology.org/amigo/term/GO:0071173	TTK
0.0610072497556799	1	29	80.1226053639847	Mitotic spindle checkpoint signaling	http://amigo.geneontology.org/amigo/term/GO:0071174	TTK
0.0610072497556799	1	32	72.6111111111111	Regulation of establishment of planar polarity	http://amigo.geneontology.org/amigo/term/GO:0090175	DAB2
0.0610072497556799	1	31	74.9534050179211	Vesicle-mediated transport between endosomal compartments	http://amigo.geneontology.org/amigo/term/GO:0098927	DAB2
0.0615556601361761	1	33	70.4107744107744	Negative regulation of metaphase/anaphase transition of cell cycle	http://amigo.geneontology.org/amigo/term/GO:1902100	TTK
0.0615556601361761	1	34	68.3398692810458	Negative regulation of chromosome separation	http://amigo.geneontology.org/amigo/term/GO:1905819	TTK
0.0615556601361761	3	1264	5.51476793248945	Protein phosphorylation	http://amigo.geneontology.org/amigo/term/GO:0006468	GPNMB DAB2 TTK
0.0615556601361761	1	34	68.3398692810458	Positive regulation of receptor-mediated endocytosis	http://amigo.geneontology.org/amigo/term/GO:0048260	DAB2
0.0615556601361761	1	34	68.3398692810458	Negative regulation of chromosome segregation	http://amigo.geneontology.org/amigo/term/GO:0051985	TTK
0.0615556601361761	1	34	68.3398692810458	Clathrin-dependent endocytosis	http://amigo.geneontology.org/amigo/term/GO:0072583	DAB2
0.0618087926084823	1	35	66.3873015873016	Positive regulation of pathway-restricted SMAD protein phosphorylation	http://amigo.geneontology.org/amigo/term/GO:0010862	DAB2
0.0618087926084823	1	35	66.3873015873016	Androgen receptor signaling pathway	http://amigo.geneontology.org/amigo/term/GO:0030521	DAB2
0.0618087926084823	1	35	66.3873015873016	Regulation of mitotic sister chromatid segregation	http://amigo.geneontology.org/amigo/term/GO:0033047	TTK
0.063438057922715	3	1310	5.32111959287532	Cell death	http://amigo.geneontology.org/amigo/term/GO:0008219	GPNMB TOP2A DAB2
0.0639487771843786	1	38	61.1461988304094	Reciprocal meiotic recombination	http://amigo.geneontology.org/amigo/term/GO:0007131	TOP2A
0.0639487771843786	1	38	61.1461988304094	Positive regulation of epithelial to mesenchymal transition	http://amigo.geneontology.org/amigo/term/GO:0010718	DAB2
0.0639487771843786	1	37	62.7987987987988	Negative regulation of mitotic nuclear division	http://amigo.geneontology.org/amigo/term/GO:0045839	TTK
0.0639487771843786	2	466	9.9723414401526	Negative regulation of cellular component organization	http://amigo.geneontology.org/amigo/term/GO:0051129	TOP2A TTK
0.0639487771843786	1	38	61.1461988304094	Reciprocal homologous recombination	http://amigo.geneontology.org/amigo/term/GO:0140527	TOP2A
0.064390013070306	1	39	59.5783475783476	Homologous recombination	http://amigo.geneontology.org/amigo/term/GO:0035825	TOP2A
0.064390013070306	3	1348	5.17111770524233	Locomotion	http://amigo.geneontology.org/amigo/term/GO:0040011	GPNMB PTPRG DAB2
0.064390013070306	1	39	59.5783475783476	Regulation of meiotic cell cycle	http://amigo.geneontology.org/amigo/term/GO:0051445	TTK
0.0647123803312421	2	479	9.70169334261192	Multicellular organismal reproductive process	http://amigo.geneontology.org/amigo/term/GO:0048609	TOP2A TTK
0.0647780074375256	1	40	58.0888888888889	Inositol phosphate metabolic process	http://amigo.geneontology.org/amigo/term/GO:0043647	ITPKA
0.0658930334698475	1	41	56.6720867208672	Non-canonical Wnt signaling pathway	http://amigo.geneontology.org/amigo/term/GO:0035567	DAB2
0.0665761656176012	2	492	9.4453477868112	Multicellular organism reproduction	http://amigo.geneontology.org/amigo/term/GO:0032504	TOP2A TTK
0.067579166697345	1	43	54.0361757105943	Negative regulation of G1/S transition of mitotic cell cycle	http://amigo.geneontology.org/amigo/term/GO:2000134	GPNMB
0.067579166697345	1	43	54.0361757105943	Negative regulation of nuclear division	http://amigo.geneontology.org/amigo/term/GO:0051784	TTK
0.0682235006816323	1	45	51.6345679012346	Negative regulation of cell cycle G1/S phase transition	http://amigo.geneontology.org/amigo/term/GO:1902807	GPNMB
0.0682235006816323	1	45	51.6345679012346	Negative regulation of reproductive process	http://amigo.geneontology.org/amigo/term/GO:2000242	TTK
0.0682235006816323	1	45	51.6345679012346	Establishment of tissue polarity	http://amigo.geneontology.org/amigo/term/GO:0007164	DAB2
0.0682235006816323	1	45	51.6345679012346	Establishment of planar polarity	http://amigo.geneontology.org/amigo/term/GO:0001736	DAB2
0.0682235006816323	2	510	9.1119825708061	Positive regulation of protein phosphorylation	http://amigo.geneontology.org/amigo/term/GO:0001934	GPNMB DAB2
0.0682935257091737	1	46	50.512077294686	Regulation of mitotic metaphase/anaphase transition	http://amigo.geneontology.org/amigo/term/GO:0030071	TTK
0.0682935257091737	1	46	50.512077294686	Regulation of tissue remodeling	http://amigo.geneontology.org/amigo/term/GO:0034103	GPNMB
0.0682935257091737	1	46	50.512077294686	Polyol biosynthetic process	http://amigo.geneontology.org/amigo/term/GO:0046173	ITPKA
0.0692902484315427	1	47	49.4373522458629	Negative regulation of T cell proliferation	http://amigo.geneontology.org/amigo/term/GO:0042130	GPNMB
0.0694043598127023	2	526	8.8348119983101	Sexual reproduction	http://amigo.geneontology.org/amigo/term/GO:0019953	TOP2A TTK
0.0698013149181698	1	48	48.4074074074074	Regulation of pathway-restricted SMAD protein phosphorylation	http://amigo.geneontology.org/amigo/term/GO:0060393	DAB2
0.0707669532752268	1	49	47.4195011337868	Regulation of metaphase/anaphase transition of cell cycle	http://amigo.geneontology.org/amigo/term/GO:1902099	TTK
0.0707817500162868	1	50	46.4711111111111	Metaphase/anaphase transition of mitotic cell cycle	http://amigo.geneontology.org/amigo/term/GO:0007091	TTK
0.0707817500162868	1	50	46.4711111111111	Phosphatidylinositol phosphate biosynthetic process	http://amigo.geneontology.org/amigo/term/GO:0046854	ITPKA
0.0707817500162868	1	50	46.4711111111111	Protein localization to microtubule cytoskeleton	http://amigo.geneontology.org/amigo/term/GO:0072698	TTK
0.0712521950583728	1	51	45.5599128540305	Regulation of mitotic sister chromatid separation	http://amigo.geneontology.org/amigo/term/GO:0010965	TTK
0.0712521950583728	1	51	45.5599128540305	Pathway-restricted SMAD protein phosphorylation	http://amigo.geneontology.org/amigo/term/GO:0060389	DAB2
0.0717050529289716	1	53	43.8406708595388	Negative regulation of epithelial cell migration	http://amigo.geneontology.org/amigo/term/GO:0010633	PTPRG
0.0717050529289716	1	53	43.8406708595388	Protein localization to cytoskeleton	http://amigo.geneontology.org/amigo/term/GO:0044380	TTK
0.0717050529289716	1	53	43.8406708595388	Metaphase/anaphase transition of cell cycle	http://amigo.geneontology.org/amigo/term/GO:0044784	TTK
0.0717050529289716	1	53	43.8406708595388	Positive regulation of viral process	http://amigo.geneontology.org/amigo/term/GO:0048524	TOP2A
0.0717050529289716	1	53	43.8406708595388	Mitotic sister chromatid separation	http://amigo.geneontology.org/amigo/term/GO:0051306	TTK
0.0739204839492247	1	55	42.2464646464646	Metaphase plate congression	http://amigo.geneontology.org/amigo/term/GO:0051310	CENPF
0.0739810540582725	2	571	8.13854835571123	Positive regulation of phosphorylation	http://amigo.geneontology.org/amigo/term/GO:0042327	GPNMB DAB2
0.0741329392462961	3	1537	4.53524181305574	Movement of cell or subcellular component	http://amigo.geneontology.org/amigo/term/GO:0006928	GPNMB PTPRG DAB2
0.0747227805834466	1	57	40.7641325536062	Regulation of chromosome separation	http://amigo.geneontology.org/amigo/term/GO:1905818	TTK
0.0747227805834466	1	57	40.7641325536062	Regulation of intracellular steroid hormone receptor signaling pathway	http://amigo.geneontology.org/amigo/term/GO:0033143	DAB2
0.0750411254734876	1	59	39.3822975517891	Negative regulation of mononuclear cell proliferation	http://amigo.geneontology.org/amigo/term/GO:0032945	GPNMB
0.0750411254734876	1	58	40.0613026819923	Regulation of sister chromatid segregation	http://amigo.geneontology.org/amigo/term/GO:0033045	TTK
0.0750411254734876	1	59	39.3822975517891	Regulation of viral genome replication	http://amigo.geneontology.org/amigo/term/GO:0045069	TOP2A
0.0750411254734876	1	58	40.0613026819923	Negative regulation of lymphocyte proliferation	http://amigo.geneontology.org/amigo/term/GO:0050672	GPNMB
0.0750411254734876	1	59	39.3822975517891	Execution phase of apoptosis	http://amigo.geneontology.org/amigo/term/GO:0097194	TOP2A
0.0757000202066326	2	595	7.81027077497666	Multi-organism reproductive process	http://amigo.geneontology.org/amigo/term/GO:0044703	TOP2A TTK
0.0762103799936103	1	61	38.0910746812386	Regulation of receptor-mediated endocytosis	http://amigo.geneontology.org/amigo/term/GO:0048259	DAB2
0.0762103799936103	1	61	38.0910746812386	Negative regulation of leukocyte proliferation	http://amigo.geneontology.org/amigo/term/GO:0070664	GPNMB
0.0772049384668045	1	63	36.8818342151676	DNA duplex unwinding	http://amigo.geneontology.org/amigo/term/GO:0032508	TOP2A
0.0772049384668045	1	63	36.8818342151676	Positive regulation of endocytosis	http://amigo.geneontology.org/amigo/term/GO:0045807	DAB2
0.0772049384668045	3	1610	4.3296066252588	Regulation of cellular component organization	http://amigo.geneontology.org/amigo/term/GO:0051128	TOP2A DAB2 TTK
0.0772049384668045	2	607	7.65586673988651	Multi-organism process	http://amigo.geneontology.org/amigo/term/GO:0051704	TOP2A TTK
0.0774536557317723	1	65	35.7470085470085	Morphogenesis of a polarized epithelium	http://amigo.geneontology.org/amigo/term/GO:0001738	DAB2
0.0774536557317723	1	66	35.2053872053872	Regulation of G2/M transition of mitotic cell cycle	http://amigo.geneontology.org/amigo/term/GO:0010389	CENPF
0.0774536557317723	2	618	7.51959726717008	Positive regulation of phosphorus metabolic process	http://amigo.geneontology.org/amigo/term/GO:0010562	GPNMB DAB2
0.0774536557317723	1	66	35.2053872053872	DNA geometric change	http://amigo.geneontology.org/amigo/term/GO:0032392	TOP2A
0.0774536557317723	1	65	35.7470085470085	Positive regulation of proteasomal ubiquitin-dependent protein catabolic process	http://amigo.geneontology.org/amigo/term/GO:0032436	DAB2
0.0774536557317723	2	618	7.51959726717008	Positive regulation of phosphate metabolic process	http://amigo.geneontology.org/amigo/term/GO:0045937	GPNMB DAB2
0.0774536557317723	1	66	35.2053872053872	SMAD protein signal transduction	http://amigo.geneontology.org/amigo/term/GO:0060395	DAB2
0.0781872562770114	1	67	34.6799336650083	Establishment of chromosome localization	http://amigo.geneontology.org/amigo/term/GO:0051303	CENPF
0.0789125287982584	1	68	34.1699346405229	Chromosome localization	http://amigo.geneontology.org/amigo/term/GO:0050000	CENPF
0.0806816022300008	2	646	7.19367045063639	Negative regulation of cell death	http://amigo.geneontology.org/amigo/term/GO:0060548	GPNMB DAB2
0.0810397015800863	1	71	32.7261345852895	Negative regulation of protein binding	http://amigo.geneontology.org/amigo/term/GO:0032091	DAB2
0.0810397015800863	1	71	32.7261345852895	Regulation of chromosome segregation	http://amigo.geneontology.org/amigo/term/GO:0051983	TTK
0.081305050120643	1	72	32.2716049382716	Regulation of cell cycle G2/M phase transition	http://amigo.geneontology.org/amigo/term/GO:1902749	CENPF
0.081305050120643	1	72	32.2716049382716	Regulation of epithelial to mesenchymal transition	http://amigo.geneontology.org/amigo/term/GO:0010717	DAB2
0.0815739442708591	1	73	31.8295281582953	Positive regulation of ubiquitin-dependent protein catabolic process	http://amigo.geneontology.org/amigo/term/GO:2000060	DAB2
0.0815739442708591	2	661	7.03042528155993	Chromosome organization	http://amigo.geneontology.org/amigo/term/GO:0051276	TOP2A TTK
0.08223990477864	1	74	31.3993993993994	Regulation of circadian rhythm	http://amigo.geneontology.org/amigo/term/GO:0042752	TOP2A
0.0823283566246094	2	668	6.95675316034597	Negative regulation of multicellular organismal process	http://amigo.geneontology.org/amigo/term/GO:0051241	GPNMB PTPRG
0.0824849875588001	1	75	30.9807407407407	Regulation of mitotic nuclear division	http://amigo.geneontology.org/amigo/term/GO:0007088	TTK
0.0831446294629252	1	76	30.5730994152047	Regulation of G1/S transition of mitotic cell cycle	http://amigo.geneontology.org/amigo/term/GO:2000045	GPNMB
0.0868559162935993	1	81	28.6858710562414	Polyol metabolic process	http://amigo.geneontology.org/amigo/term/GO:0019751	ITPKA
0.0868559162935993	2	699	6.6482276267684	Positive regulation of protein modification process	http://amigo.geneontology.org/amigo/term/GO:0031401	GPNMB DAB2
0.0868559162935993	1	81	28.6858710562414	Protein localization to chromosome	http://amigo.geneontology.org/amigo/term/GO:0034502	TTK
0.0868559162935993	1	80	29.0444444444444	Negative regulation of T cell activation	http://amigo.geneontology.org/amigo/term/GO:0050868	GPNMB
0.0881539459601261	3	1781	3.91390604529291	Protein localization	http://amigo.geneontology.org/amigo/term/GO:0008104	DAB2 TTK CENPF
0.0881757733101294	1	84	27.6613756613757	Mitotic cell cycle checkpoint signaling	http://amigo.geneontology.org/amigo/term/GO:0007093	TTK
0.0881757733101294	1	84	27.6613756613757	Intracellular steroid hormone receptor signaling pathway	http://amigo.geneontology.org/amigo/term/GO:0030518	DAB2
0.0881757733101294	1	84	27.6613756613757	Positive regulation of proteasomal protein catabolic process	http://amigo.geneontology.org/amigo/term/GO:1901800	DAB2
0.0887754120273672	1	85	27.3359477124183	Viral genome replication	http://amigo.geneontology.org/amigo/term/GO:0019079	TOP2A
0.0893688642930428	1	86	27.0180878552972	Regulation of protein localization to plasma membrane	http://amigo.geneontology.org/amigo/term/GO:1903076	DAB2
0.0905375651957432	1	88	26.4040404040404	Negative regulation of leukocyte cell-cell adhesion	http://amigo.geneontology.org/amigo/term/GO:1903038	GPNMB
0.0905375651957432	1	88	26.4040404040404	Positive regulation of transmembrane receptor protein serine/threonine kinase signaling pathway	http://amigo.geneontology.org/amigo/term/GO:0090100	DAB2
0.0906811723544073	1	89	26.1073657927591	Regulation of cell cycle G1/S phase transition	http://amigo.geneontology.org/amigo/term/GO:1902806	GPNMB
0.0906811723544073	1	89	26.1073657927591	Negative regulation of cellular protein localization	http://amigo.geneontology.org/amigo/term/GO:1903828	DAB2
0.0915155969724469	1	92	25.256038647343	Positive regulation of proteolysis involved in cellular protein catabolic process	http://amigo.geneontology.org/amigo/term/GO:1903052	DAB2
0.0915155969724469	1	91	25.5335775335775	Regulation of animal organ morphogenesis	http://amigo.geneontology.org/amigo/term/GO:2000027	DAB2
0.0915155969724469	1	92	25.256038647343	G2/M transition of mitotic cell cycle	http://amigo.geneontology.org/amigo/term/GO:0000086	CENPF
0.0915155969724469	1	91	25.5335775335775	Alcohol biosynthetic process	http://amigo.geneontology.org/amigo/term/GO:0046165	ITPKA
0.0915155969724469	3	1849	3.76996574725077	Regulation of multicellular organismal process	http://amigo.geneontology.org/amigo/term/GO:0051239	GPNMB PTPRG DAB2
0.0920664539892539	1	93	24.984468339307	Peptidyl-threonine phosphorylation	http://amigo.geneontology.org/amigo/term/GO:0018107	TTK
0.0935792678136694	1	95	24.4584795321637	Steroid hormone mediated signaling pathway	http://amigo.geneontology.org/amigo/term/GO:0043401	DAB2
0.0941145604383684	1	96	24.2037037037037	Phosphatidylinositol biosynthetic process	http://amigo.geneontology.org/amigo/term/GO:0006661	ITPKA
0.0946446185036872	1	97	23.9541809851088	Regulation of transforming growth factor beta receptor signaling pathway	http://amigo.geneontology.org/amigo/term/GO:0017015	DAB2
0.0948349455176856	1	99	23.4702581369248	Regulation of cellular response to transforming growth factor beta stimulus	http://amigo.geneontology.org/amigo/term/GO:1903844	DAB2
0.0948349455176856	1	99	23.4702581369248	Meiosis I	http://amigo.geneontology.org/amigo/term/GO:0007127	TOP2A
0.0948349455176856	1	99	23.4702581369248	Peptidyl-threonine modification	http://amigo.geneontology.org/amigo/term/GO:0018210	TTK
0.0948349455176856	1	99	23.4702581369248	Regulation of nuclear division	http://amigo.geneontology.org/amigo/term/GO:0051783	TTK
0.0950171744592322	1	101	23.005500550055	Regulation of protein localization to cell periphery	http://amigo.geneontology.org/amigo/term/GO:1904375	DAB2
0.0950171744592322	1	101	23.005500550055	Regulation of proteasomal ubiquitin-dependent protein catabolic process	http://amigo.geneontology.org/amigo/term/GO:0032434	DAB2
0.0950171744592322	1	101	23.005500550055	Peptidyl-tyrosine dephosphorylation	http://amigo.geneontology.org/amigo/term/GO:0035335	PTPRG
0.0950171744592322	1	101	23.005500550055	Cell cycle G2/M phase transition	http://amigo.geneontology.org/amigo/term/GO:0044839	CENPF
0.0963494530647431	3	1935	3.60241171403962	Regulation of localization	http://amigo.geneontology.org/amigo/term/GO:0032879	GPNMB PTPRG DAB2
0.096586787020748	2	800	5.80888888888889	Regulation of protein phosphorylation	http://amigo.geneontology.org/amigo/term/GO:0001932	GPNMB DAB2
0.096586787020748	1	105	22.1291005291005	Hematopoietic progenitor cell differentiation	http://amigo.geneontology.org/amigo/term/GO:0002244	TOP2A
0.096586787020748	1	105	22.1291005291005	Negative regulation of lymphocyte activation	http://amigo.geneontology.org/amigo/term/GO:0051250	GPNMB
0.096586787020748	1	104	22.3418803418803	Meiosis I cell cycle process	http://amigo.geneontology.org/amigo/term/GO:0061982	TOP2A
0.0970714563053038	1	106	21.9203354297694	Negative regulation of canonical Wnt signaling pathway	http://amigo.geneontology.org/amigo/term/GO:0090090	DAB2
0.0975516571461285	1	107	21.7154724818276	Regulation of viral life cycle	http://amigo.geneontology.org/amigo/term/GO:1903900	TOP2A
0.0989162483418496	1	109	21.3170234454638	Positive regulation of cellular protein catabolic process	http://amigo.geneontology.org/amigo/term/GO:1903364	DAB2
0.0995551045699615	2	824	5.63969795037756	Regulation of organelle organization	http://amigo.geneontology.org/amigo/term/GO:0033043	TOP2A TTK
0.099846668618026	1	111	20.9329329329329	Regulation of synaptic plasticity	http://amigo.geneontology.org/amigo/term/GO:0048167	ITPKA
0.10118182934603	1	113	20.5624385447394	Positive regulation of Wnt signaling pathway	http://amigo.geneontology.org/amigo/term/GO:0030177	DAB2
0.101632547532904	1	114	20.3820662768031	Epithelial to mesenchymal transition	http://amigo.geneontology.org/amigo/term/GO:0001837	DAB2
0.102079191176372	1	115	20.2048309178744	Negative regulation of binding	http://amigo.geneontology.org/amigo/term/GO:0051100	DAB2
0.102960456491249	1	117	19.8594491927825	Cytosolic transport	http://amigo.geneontology.org/amigo/term/GO:0016482	DAB2
0.102960456491249	1	117	19.8594491927825	Cellular response to steroid hormone stimulus	http://amigo.geneontology.org/amigo/term/GO:0071383	DAB2
0.103395176925488	1	118	19.6911487758945	Regulation of T cell proliferation	http://amigo.geneontology.org/amigo/term/GO:0042129	GPNMB
0.103412283956209	1	120	19.362962962963	Regulation of ubiquitin-dependent protein catabolic process	http://amigo.geneontology.org/amigo/term/GO:2000058	DAB2
0.103412283956209	1	120	19.362962962963	Cell cycle checkpoint signaling	http://amigo.geneontology.org/amigo/term/GO:0000075	TTK
0.103412283956209	1	120	19.362962962963	G1/S transition of mitotic cell cycle	http://amigo.geneontology.org/amigo/term/GO:0000082	GPNMB
0.103412283956209	1	119	19.5256769374416	Negative regulation of neuron death	http://amigo.geneontology.org/amigo/term/GO:1901215	GPNMB
0.103420149936621	1	121	19.2029384756657	Positive regulation of intracellular transport	http://amigo.geneontology.org/amigo/term/GO:0032388	DAB2
0.103420149936621	1	121	19.2029384756657	Regulation of viral process	http://amigo.geneontology.org/amigo/term/GO:0050792	TOP2A
0.103427572254575	1	122	19.0455373406193	Regulation of reproductive process	http://amigo.geneontology.org/amigo/term/GO:2000241	TTK
0.103427572254575	1	122	19.0455373406193	Tissue remodeling	http://amigo.geneontology.org/amigo/term/GO:0048771	GPNMB
0.104667702558462	1	124	18.7383512544803	Regulation of endocytosis	http://amigo.geneontology.org/amigo/term/GO:0030100	DAB2
0.105481522568082	1	126	18.4409171075838	Negative regulation of cell-cell adhesion	http://amigo.geneontology.org/amigo/term/GO:0022408	GPNMB
0.105481522568082	1	126	18.4409171075838	Negative regulation of leukocyte activation	http://amigo.geneontology.org/amigo/term/GO:0002695	GPNMB
0.106376799322111	2	907	5.12360651721181	Negative regulation of RNA biosynthetic process	http://amigo.geneontology.org/amigo/term/GO:1902679	DAB2 CENPF
0.106376799322111	2	906	5.12926171204317	Negative regulation of nucleic acid-templated transcription	http://amigo.geneontology.org/amigo/term/GO:1903507	DAB2 CENPF
0.106376799322111	1	133	17.4703425229741	Regulation of protein localization to membrane	http://amigo.geneontology.org/amigo/term/GO:1905475	DAB2
0.106376799322111	1	129	18.0120585701981	DNA packaging	http://amigo.geneontology.org/amigo/term/GO:0006323	TOP2A
0.106376799322111	1	133	17.4703425229741	Circadian rhythm	http://amigo.geneontology.org/amigo/term/GO:0007623	TOP2A
0.106376799322111	1	132	17.6026936026936	Mitotic sister chromatid segregation	http://amigo.geneontology.org/amigo/term/GO:0000070	TTK
0.106376799322111	2	915	5.07880995749848	Reproduction	http://amigo.geneontology.org/amigo/term/GO:0000003	TOP2A TTK
0.106376799322111	1	132	17.6026936026936	Hormone-mediated signaling pathway	http://amigo.geneontology.org/amigo/term/GO:0009755	DAB2
0.106376799322111	2	913	5.08993549957405	Reproductive process	http://amigo.geneontology.org/amigo/term/GO:0022414	TOP2A TTK
0.106376799322111	1	128	18.1527777777778	Negative regulation of Wnt signaling pathway	http://amigo.geneontology.org/amigo/term/GO:0030178	DAB2
0.106376799322111	2	915	5.07880995749848	Regulation of phosphorylation	http://amigo.geneontology.org/amigo/term/GO:0042325	GPNMB DAB2
0.106376799322111	1	132	17.6026936026936	Cell cycle G1/S phase transition	http://amigo.geneontology.org/amigo/term/GO:0044843	GPNMB
0.106376799322111	2	904	5.14060963618486	Negative regulation of transcription, DNA-templated	http://amigo.geneontology.org/amigo/term/GO:0045892	DAB2 CENPF
0.1084936310841	1	137	16.9602595296026	Negative regulation of cell activation	http://amigo.geneontology.org/amigo/term/GO:0050866	GPNMB
0.108860058277285	1	138	16.8373590982287	Response to steroid hormone	http://amigo.geneontology.org/amigo/term/GO:0048545	DAB2
0.109182542372158	1	140	16.5968253968254	Glycerophospholipid biosynthetic process	http://amigo.geneontology.org/amigo/term/GO:0046474	ITPKA
0.109182542372158	1	140	16.5968253968254	Phosphatidylinositol metabolic process	http://amigo.geneontology.org/amigo/term/GO:0046488	ITPKA
0.109182542372158	1	140	16.5968253968254	Regulation of proteasomal protein catabolic process	http://amigo.geneontology.org/amigo/term/GO:0061136	DAB2
0.109407284531709	2	941	4.93848152084071	Regulation of apoptotic process	http://amigo.geneontology.org/amigo/term/GO:0042981	TOP2A DAB2
0.109649242191159	1	142	16.3630672926448	T cell proliferation	http://amigo.geneontology.org/amigo/term/GO:0042098	GPNMB
0.109649242191159	2	946	4.91237961005403	Positive regulation of transcription by RNA polymerase II	http://amigo.geneontology.org/amigo/term/GO:0045944	TOP2A DAB2
0.112835686326531	1	147	15.8065003779289	Transforming growth factor beta receptor signaling pathway	http://amigo.geneontology.org/amigo/term/GO:0007179	DAB2
0.11321467759679	2	967	4.80569918418936	Regulation of programmed cell death	http://amigo.geneontology.org/amigo/term/GO:0043067	TOP2A DAB2
0.113507771554754	1	149	15.5943325876212	Regulation of protein binding	http://amigo.geneontology.org/amigo/term/GO:0043393	DAB2
0.11416915685718	2	976	4.76138433515483	Positive regulation of cellular protein metabolic process	http://amigo.geneontology.org/amigo/term/GO:0032270	GPNMB DAB2
0.11416915685718	1	151	15.3877851361295	Regulation of lymphocyte proliferation	http://amigo.geneontology.org/amigo/term/GO:0050670	GPNMB
0.115141668597797	1	153	15.1866376180102	Regulation of mononuclear cell proliferation	http://amigo.geneontology.org/amigo/term/GO:0032944	GPNMB
0.115141668597797	2	987	4.70831926151075	Negative regulation of RNA metabolic process	http://amigo.geneontology.org/amigo/term/GO:0051253	DAB2 CENPF
0.115141668597797	1	154	15.0880230880231	Organic hydroxy compound biosynthetic process	http://amigo.geneontology.org/amigo/term/GO:1901617	ITPKA
0.115460731742898	1	155	14.9906810035842	Receptor-mediated endocytosis	http://amigo.geneontology.org/amigo/term/GO:0006898	DAB2
0.118655563118488	1	160	14.5222222222222	Regulation of proteolysis involved in cellular protein catabolic process	http://amigo.geneontology.org/amigo/term/GO:1903050	DAB2
0.119259058464643	1	162	14.3429355281207	Regulation of leukocyte proliferation	http://amigo.geneontology.org/amigo/term/GO:0070663	GPNMB
0.119259058464643	1	162	14.3429355281207	Regulation of neuron death	http://amigo.geneontology.org/amigo/term/GO:1901214	GPNMB
0.12026785355838	1	164	14.1680216802168	Glycerolipid biosynthetic process	http://amigo.geneontology.org/amigo/term/GO:0045017	ITPKA
0.121268599266807	1	166	13.9973226238286	Phospholipid biosynthetic process	http://amigo.geneontology.org/amigo/term/GO:0008654	ITPKA
0.12254461146112	1	169	13.7488494411571	Positive regulation of protein catabolic process	http://amigo.geneontology.org/amigo/term/GO:0045732	DAB2
0.12254461146112	2	1038	4.47698565617641	Positive regulation of protein metabolic process	http://amigo.geneontology.org/amigo/term/GO:0051247	GPNMB DAB2
0.12282564049621	1	170	13.6679738562091	Mesenchymal cell differentiation	http://amigo.geneontology.org/amigo/term/GO:0048762	DAB2
0.124733014512718	2	1064	4.36758563074353	Negative regulation of cellular macromolecule biosynthetic process	http://amigo.geneontology.org/amigo/term/GO:2000113	DAB2 CENPF
0.124733014512718	1	175	13.2774603174603	Regulation of epithelial cell migration	http://amigo.geneontology.org/amigo/term/GO:0010632	PTPRG
0.124733014512718	1	177	13.127432517263	Negative regulation of cytokine production	http://amigo.geneontology.org/amigo/term/GO:0001818	GPNMB
0.124733014512718	1	177	13.127432517263	Viral life cycle	http://amigo.geneontology.org/amigo/term/GO:0019058	TOP2A
0.124733014512718	2	1066	4.35939128622055	Negative regulation of nucleobase-containing compound metabolic process	http://amigo.geneontology.org/amigo/term/GO:0045934	DAB2 CENPF
0.124733014512718	1	176	13.2020202020202	Rhythmic process	http://amigo.geneontology.org/amigo/term/GO:0048511	TOP2A
0.124733014512718	1	175	13.2774603174603	Cellular response to transforming growth factor beta stimulus	http://amigo.geneontology.org/amigo/term/GO:0071560	DAB2
0.12571457201504	2	1074	4.32691909786882	Negative regulation of macromolecule biosynthetic process	http://amigo.geneontology.org/amigo/term/GO:0010558	DAB2 CENPF
0.12571457201504	2	1079	4.30686849963958	Regulation of phosphate metabolic process	http://amigo.geneontology.org/amigo/term/GO:0019220	GPNMB DAB2
0.12571457201504	2	1079	4.30686849963958	Regulation of phosphorus metabolic process	http://amigo.geneontology.org/amigo/term/GO:0051174	GPNMB DAB2
0.12571457201504	1	180	12.9086419753086	Response to transforming growth factor beta	http://amigo.geneontology.org/amigo/term/GO:0071559	DAB2
0.128706103588548	1	186	12.4922341696535	Intracellular receptor signaling pathway	http://amigo.geneontology.org/amigo/term/GO:0030522	DAB2
0.128950679572279	1	187	12.425430778372	Regulation of cellular protein catabolic process	http://amigo.geneontology.org/amigo/term/GO:1903362	DAB2
0.12967338413236	1	190	12.2292397660819	Negative regulation of cell migration	http://amigo.geneontology.org/amigo/term/GO:0030336	PTPRG
0.12967338413236	2	1105	4.20553041729512	Negative regulation of cellular biosynthetic process	http://amigo.geneontology.org/amigo/term/GO:0031327	DAB2 CENPF
0.12967338413236	1	190	12.2292397660819	Neuron death	http://amigo.geneontology.org/amigo/term/GO:0070997	GPNMB
0.13056600547529	1	192	12.1018518518519	Negative regulation of cell adhesion	http://amigo.geneontology.org/amigo/term/GO:0007162	GPNMB
0.132012120433386	2	1124	4.13444049031238	Negative regulation of biosynthetic process	http://amigo.geneontology.org/amigo/term/GO:0009890	DAB2 CENPF
0.132556084669238	1	197	11.794698251551	Regulation of canonical Wnt signaling pathway	http://amigo.geneontology.org/amigo/term/GO:0060828	DAB2
0.132556084669238	1	197	11.794698251551	Regulation of transmembrane receptor protein serine/threonine kinase signaling pathway	http://amigo.geneontology.org/amigo/term/GO:0090092	DAB2
0.132779420510917	1	198	11.7351290684624	DNA conformation change	http://amigo.geneontology.org/amigo/term/GO:0071103	TOP2A
0.133001089842934	1	199	11.6761585706309	Negative regulation of cell motility	http://amigo.geneontology.org/amigo/term/GO:2000146	PTPRG
0.133861769271983	1	201	11.5599778883361	Lymphocyte proliferation	http://amigo.geneontology.org/amigo/term/GO:0046651	GPNMB
0.13436358699634	2	1150	4.04096618357488	Regulation of protein modification process	http://amigo.geneontology.org/amigo/term/GO:0031399	GPNMB DAB2
0.13436358699634	1	203	11.4460864805692	Mononuclear cell proliferation	http://amigo.geneontology.org/amigo/term/GO:0032943	GPNMB
0.13450531769198	1	204	11.3899782135076	Negative regulation of cellular component movement	http://amigo.geneontology.org/amigo/term/GO:0051271	PTPRG
0.137345953085889	2	1173	3.96173155252439	Apoptotic process	http://amigo.geneontology.org/amigo/term/GO:0006915	TOP2A DAB2
0.137345953085889	1	210	11.0645502645503	Regulation of intracellular transport	http://amigo.geneontology.org/amigo/term/GO:0032386	DAB2
0.137345953085889	1	210	11.0645502645503	Mesenchyme development	http://amigo.geneontology.org/amigo/term/GO:0060485	DAB2
0.139710226317355	1	215	10.8072351421189	Negative regulation of locomotion	http://amigo.geneontology.org/amigo/term/GO:0040013	PTPRG
0.140033690932049	1	219	10.6098427194318	Regulation of leukocyte cell-cell adhesion	http://amigo.geneontology.org/amigo/term/GO:1903037	GPNMB
0.140033690932049	1	217	10.7076292882744	Kidney development	http://amigo.geneontology.org/amigo/term/GO:0001822	CENPF
0.140033690932049	1	219	10.6098427194318	Leukocyte proliferation	http://amigo.geneontology.org/amigo/term/GO:0070661	GPNMB
0.140033690932049	1	217	10.7076292882744	Protein localization to plasma membrane	http://amigo.geneontology.org/amigo/term/GO:0072659	DAB2
0.140033690932049	1	219	10.6098427194318	Mitotic nuclear division	http://amigo.geneontology.org/amigo/term/GO:0140014	TTK
0.140829507396797	1	221	10.5138260432378	Cellular carbohydrate metabolic process	http://amigo.geneontology.org/amigo/term/GO:0044262	ITPKA
0.141058209381187	1	227	10.2359275575135	DNA recombination	http://amigo.geneontology.org/amigo/term/GO:0006310	TOP2A
0.141058209381187	1	225	10.3269135802469	Epithelial cell migration	http://amigo.geneontology.org/amigo/term/GO:0010631	PTPRG
0.141058209381187	2	1214	3.82793336994325	Programmed cell death	http://amigo.geneontology.org/amigo/term/GO:0012501	TOP2A DAB2
0.141058209381187	1	223	10.4195316392626	Regulation of T cell activation	http://amigo.geneontology.org/amigo/term/GO:0050863	GPNMB
0.141058209381187	1	225	10.3269135802469	Renal system development	http://amigo.geneontology.org/amigo/term/GO:0072001	CENPF
0.141058209381187	1	227	10.2359275575135	Epithelium migration	http://amigo.geneontology.org/amigo/term/GO:0090132	PTPRG
0.141058209381187	1	226	10.2812192723697	Regulation of cellular response to growth factor stimulus	http://amigo.geneontology.org/amigo/term/GO:0090287	DAB2
0.141058209381187	1	223	10.4195316392626	Alcohol metabolic process	http://amigo.geneontology.org/amigo/term/GO:0006066	ITPKA
0.142397743715539	2	1236	3.75979863358504	Positive regulation of RNA biosynthetic process	http://amigo.geneontology.org/amigo/term/GO:1902680	TOP2A DAB2
0.142397743715539	2	1235	3.76284300494827	Positive regulation of nucleic acid-templated transcription	http://amigo.geneontology.org/amigo/term/GO:1903508	TOP2A DAB2
0.142397743715539	2	1235	3.76284300494827	Positive regulation of transcription, DNA-templated	http://amigo.geneontology.org/amigo/term/GO:0045893	TOP2A DAB2
0.142925321572826	1	233	9.9723414401526	Tissue migration	http://amigo.geneontology.org/amigo/term/GO:0090130	PTPRG
0.14367608639896	1	235	9.88747044917258	Viral process	http://amigo.geneontology.org/amigo/term/GO:0016032	TOP2A
0.146166432643637	1	240	9.68148148148148	Peptidyl-serine phosphorylation	http://amigo.geneontology.org/amigo/term/GO:0018105	TTK
0.146321010868596	1	241	9.64130935915168	Canonical Wnt signaling pathway	http://amigo.geneontology.org/amigo/term/GO:0060070	DAB2
0.148205860539131	1	245	9.48390022675737	Regulation of Wnt signaling pathway	http://amigo.geneontology.org/amigo/term/GO:0030111	DAB2
0.148352536844361	1	246	9.4453477868112	Glycerophospholipid metabolic process	http://amigo.geneontology.org/amigo/term/GO:0006650	ITPKA
0.150216228475573	1	250	9.29422222222222	Positive regulation of proteolysis	http://amigo.geneontology.org/amigo/term/GO:0045862	DAB2
0.150925564549098	1	252	9.22045855379189	Leukocyte cell-cell adhesion	http://amigo.geneontology.org/amigo/term/GO:0007159	GPNMB
0.152765916047702	1	256	9.07638888888889	Urogenital system development	http://amigo.geneontology.org/amigo/term/GO:0001655	CENPF
0.153461280493309	1	258	9.00602928509905	Protein localization to cell periphery	http://amigo.geneontology.org/amigo/term/GO:1990778	DAB2
0.154344653588172	1	261	8.90251170710941	Peptidyl-serine modification	http://amigo.geneontology.org/amigo/term/GO:0018209	TTK
0.154344653588172	2	1322	3.51521264077996	Cellular protein localization	http://amigo.geneontology.org/amigo/term/GO:0034613	DAB2 TTK
0.154642361966581	1	264	8.8013468013468	Modulation of chemical synaptic transmission	http://amigo.geneontology.org/amigo/term/GO:0050804	ITPKA
0.154642361966581	2	1328	3.49933065595716	Positive regulation of RNA metabolic process	http://amigo.geneontology.org/amigo/term/GO:0051254	TOP2A DAB2
0.154642361966581	2	1328	3.49933065595716	Cellular macromolecule localization	http://amigo.geneontology.org/amigo/term/GO:0070727	DAB2 TTK
0.154762740108549	1	265	8.76813417190776	Regulation of trans-synaptic signaling	http://amigo.geneontology.org/amigo/term/GO:0099177	ITPKA
0.155435013713753	1	267	8.70245526425302	Peptidyl-tyrosine phosphorylation	http://amigo.geneontology.org/amigo/term/GO:0018108	TTK
0.155551864202098	1	268	8.66998341625207	Regulation of binding	http://amigo.geneontology.org/amigo/term/GO:0051098	DAB2
0.155667850772814	1	269	8.63775299463032	Peptidyl-tyrosine modification	http://amigo.geneontology.org/amigo/term/GO:0018212	TTK
0.15633030911374	1	271	8.5740057400574	Protein dephosphorylation	http://amigo.geneontology.org/amigo/term/GO:0006470	PTPRG
0.158623150783812	1	276	8.41867954911433	Establishment of organelle localization	http://amigo.geneontology.org/amigo/term/GO:0051656	CENPF
0.160898059744533	1	281	8.26888098062475	Negative regulation of immune system process	http://amigo.geneontology.org/amigo/term/GO:0002683	GPNMB
0.160995309189925	1	282	8.23955870764381	Transmembrane receptor protein serine/threonine kinase signaling pathway	http://amigo.geneontology.org/amigo/term/GO:0007178	DAB2
0.161916309546863	2	1387	3.35047664824161	Positive regulation of macromolecule biosynthetic process	http://amigo.geneontology.org/amigo/term/GO:0010557	TOP2A DAB2
0.16654730253163	1	294	7.90325018896447	Regulation of protein catabolic process	http://amigo.geneontology.org/amigo/term/GO:0042176	DAB2
0.166625622847475	1	295	7.87645951035782	Regulation of cell-cell adhesion	http://amigo.geneontology.org/amigo/term/GO:0022407	GPNMB
0.169889226756745	1	302	7.69389256806475	Cellular component disassembly	http://amigo.geneontology.org/amigo/term/GO:0022411	TOP2A
0.169956395359019	1	303	7.66850018335167	Positive regulation of cellular catabolic process	http://amigo.geneontology.org/amigo/term/GO:0031331	DAB2
0.170022995181236	1	304	7.64327485380117	Cell division	http://amigo.geneontology.org/amigo/term/GO:0051301	TOP2A
0.170393028833771	2	1446	3.21376978638389	Positive regulation of cellular biosynthetic process	http://amigo.geneontology.org/amigo/term/GO:0031328	TOP2A DAB2
0.170393028833771	2	1445	3.2159938485198	Positive regulation of nucleobase-containing compound metabolic process	http://amigo.geneontology.org/amigo/term/GO:0045935	TOP2A DAB2
0.171785189896506	1	310	7.49534050179211	Phospholipid metabolic process	http://amigo.geneontology.org/amigo/term/GO:0006644	ITPKA
0.172020354563724	1	314	7.3998584571833	Ameboidal-type cell migration	http://amigo.geneontology.org/amigo/term/GO:0001667	PTPRG
0.172020354563724	2	1465	3.17208949563898	Positive regulation of biosynthetic process	http://amigo.geneontology.org/amigo/term/GO:0009891	TOP2A DAB2
0.172020354563724	1	314	7.3998584571833	Wnt signaling pathway	http://amigo.geneontology.org/amigo/term/GO:0016055	DAB2
0.172020354563724	1	312	7.44729344729345	Glycerolipid metabolic process	http://amigo.geneontology.org/amigo/term/GO:0046486	ITPKA
0.173104867357875	1	317	7.3298282509639	Cell-cell signaling by wnt	http://amigo.geneontology.org/amigo/term/GO:0198738	DAB2
0.175204147573754	1	322	7.216011042098	Cellular response to lipid	http://amigo.geneontology.org/amigo/term/GO:0071396	DAB2
0.176778688247909	1	326	7.12747102931152	Proteasome-mediated ubiquitin-dependent protein catabolic process	http://amigo.geneontology.org/amigo/term/GO:0043161	DAB2
0.180872735242021	1	335	6.93598673300166	Regulation of lymphocyte activation	http://amigo.geneontology.org/amigo/term/GO:0051249	GPNMB
0.181301761240866	2	1525	3.04728597449909	Establishment of localization in cell	http://amigo.geneontology.org/amigo/term/GO:0051649	DAB2 CENPF
0.181434028631932	1	338	6.87442472057857	Organic hydroxy compound metabolic process	http://amigo.geneontology.org/amigo/term/GO:1901615	ITPKA
0.181461364980109	1	339	6.85414618157981	Positive regulation of apoptotic process	http://amigo.geneontology.org/amigo/term/GO:0043065	TOP2A
0.184481619006809	1	346	6.71547848426461	Cellular response to organic cyclic compound	http://amigo.geneontology.org/amigo/term/GO:0071407	DAB2
0.184499348754712	1	347	6.69612552033301	T cell activation	http://amigo.geneontology.org/amigo/term/GO:0042110	GPNMB
0.184533956531935	1	349	6.65775230818211	Cellular response to hormone stimulus	http://amigo.geneontology.org/amigo/term/GO:0032870	DAB2
0.184533956531935	1	349	6.65775230818211	Positive regulation of programmed cell death	http://amigo.geneontology.org/amigo/term/GO:0043068	TOP2A
0.187501730740847	1	356	6.52684144818976	Positive regulation of catabolic process	http://amigo.geneontology.org/amigo/term/GO:0009896	DAB2
0.18946723040214	1	361	6.43644198214835	Regulation of vesicle-mediated transport	http://amigo.geneontology.org/amigo/term/GO:0060627	DAB2
0.197203572479997	1	380	6.11461988304093	Proteasomal protein catabolic process	http://amigo.geneontology.org/amigo/term/GO:0010498	DAB2
0.197203572479997	1	378	6.14697236919459	Positive regulation of cell death	http://amigo.geneontology.org/amigo/term/GO:0010942	TOP2A
0.197203572479997	1	379	6.13075344473761	Small molecule biosynthetic process	http://amigo.geneontology.org/amigo/term/GO:0044283	ITPKA
0.198596503086731	1	385	6.03520923520923	Regulation of cellular protein localization	http://amigo.geneontology.org/amigo/term/GO:1903827	DAB2
0.198596503086731	1	384	6.05092592592593	Cell surface receptor signaling pathway involved in cell-cell signaling	http://amigo.geneontology.org/amigo/term/GO:1905114	DAB2
0.198993141490181	1	388	5.9885452462772	Morphogenesis of an epithelium	http://amigo.geneontology.org/amigo/term/GO:0002009	DAB2
0.198993141490181	1	388	5.9885452462772	Organelle localization	http://amigo.geneontology.org/amigo/term/GO:0051640	CENPF
0.198993141490181	1	389	5.97315052842045	Organophosphate biosynthetic process	http://amigo.geneontology.org/amigo/term/GO:0090407	ITPKA

## Sheet: GO, EX CC (UPREGULATED)
GO BIOLOGICAL PROCESSES FOR GENES UPREGULATED IN CUMULUS CELLS OF EXPANDED COC GROUP
Enrichment FDR	nGenes	Pathway Genes	Fold Enrichment	Pathway	URL	Genes
0.0523067902624409	1	7	597.485714285714	Extraembryonic membrane development	http://amigo.geneontology.org/amigo/term/GO:1903867	FZD5
0.0523067902624409	1	21	199.161904761905	Negative regulation of cyclin-dependent protein kinase activity	http://amigo.geneontology.org/amigo/term/GO:1904030	CDKN1C
0.0523067902624409	1	16	261.4	Regulation of bicellular tight junction assembly	http://amigo.geneontology.org/amigo/term/GO:2000810	FZD5
0.0523067902624409	1	14	298.742857142857	Blastoderm segmentation	http://amigo.geneontology.org/amigo/term/GO:0007350	FZD5
0.0523067902624409	1	11	380.218181818182	Tripartite regional subdivision	http://amigo.geneontology.org/amigo/term/GO:0007351	FZD5
0.0523067902624409	1	11	380.218181818182	Anterior/posterior axis specification, embryo	http://amigo.geneontology.org/amigo/term/GO:0008595	FZD5
0.0523067902624409	2	320	26.14	In utero embryonic development	http://amigo.geneontology.org/amigo/term/GO:0001701	FZD5 HOPX
0.0523067902624409	2	546	15.3201465201465	Embryo development ending in birth or egg hatching	http://amigo.geneontology.org/amigo/term/GO:0009792	FZD5 HOPX
0.0523067902624409	1	17	246.023529411765	Trophectodermal cell differentiation	http://amigo.geneontology.org/amigo/term/GO:0001829	HOPX
0.0523067902624409	1	4	1045.6	Post-embryonic camera-type eye development	http://amigo.geneontology.org/amigo/term/GO:0031077	FZD5
0.0523067902624409	3	1749	7.17392795883362	Regulation of cellular protein metabolic process	http://amigo.geneontology.org/amigo/term/GO:0032268	FZD5 GUF1 CDKN1C
0.0523067902624409	1	24	174.266666666667	T cell cytokine production	http://amigo.geneontology.org/amigo/term/GO:0002369	FZD5
0.0523067902624409	2	539	15.5191094619666	Chordate embryonic development	http://amigo.geneontology.org/amigo/term/GO:0043009	FZD5 HOPX
0.0523067902624409	1	25	167.296	Skeletal muscle tissue regeneration	http://amigo.geneontology.org/amigo/term/GO:0043403	HOPX
0.0523067902624409	1	5	836.48	Positive regulation of skeletal muscle tissue regeneration	http://amigo.geneontology.org/amigo/term/GO:0043415	HOPX
0.0523067902624409	1	7	597.485714285714	Regulation of skeletal muscle tissue regeneration	http://amigo.geneontology.org/amigo/term/GO:0043416	HOPX
0.0523067902624409	1	26	160.861538461538	Positive regulation of JUN kinase activity	http://amigo.geneontology.org/amigo/term/GO:0043507	FZD5
0.0523067902624409	2	531	15.7529190207156	Regulation of kinase activity	http://amigo.geneontology.org/amigo/term/GO:0043549	FZD5 CDKN1C
0.0523067902624409	1	20	209.12	Negative regulation of cyclin-dependent protein serine/threonine kinase activity	http://amigo.geneontology.org/amigo/term/GO:0045736	CDKN1C
0.0523067902624409	2	448	18.6714285714286	Regulation of protein kinase activity	http://amigo.geneontology.org/amigo/term/GO:0045859	FZD5 CDKN1C
0.0523067902624409	1	27	154.903703703704	Embryonic eye morphogenesis	http://amigo.geneontology.org/amigo/term/GO:0048048	FZD5
0.0523067902624409	1	13	321.723076923077	Post-embryonic animal organ development	http://amigo.geneontology.org/amigo/term/GO:0048569	FZD5
0.0523067902624409	1	20	209.12	Embryonic camera-type eye morphogenesis	http://amigo.geneontology.org/amigo/term/GO:0048596	FZD5
0.0523067902624409	1	24	174.266666666667	Regulation of T cell cytokine production	http://amigo.geneontology.org/amigo/term/GO:0002724	FZD5
0.0523067902624409	1	16	261.4	Positive regulation of T cell cytokine production	http://amigo.geneontology.org/amigo/term/GO:0002726	FZD5
0.0523067902624409	1	16	261.4	Chaperone-mediated protein complex assembly	http://amigo.geneontology.org/amigo/term/GO:0051131	HOPX
0.0523067902624409	3	1877	6.68470964304742	Regulation of protein metabolic process	http://amigo.geneontology.org/amigo/term/GO:0051246	FZD5 GUF1 CDKN1C
0.0523067902624409	1	4	1045.6	Spemann organizer formation	http://amigo.geneontology.org/amigo/term/GO:0060061	FZD5
0.0523067902624409	1	22	190.109090909091	Apoptotic process involved in morphogenesis	http://amigo.geneontology.org/amigo/term/GO:0060561	FZD5
0.0523067902624409	1	16	261.4	Embryonic placenta morphogenesis	http://amigo.geneontology.org/amigo/term/GO:0060669	FZD5
0.0523067902624409	1	8	522.8	Branching involved in labyrinthine layer morphogenesis	http://amigo.geneontology.org/amigo/term/GO:0060670	FZD5
0.0523067902624409	1	22	190.109090909091	Placenta blood vessel development	http://amigo.geneontology.org/amigo/term/GO:0060674	FZD5
0.0523067902624409	1	17	246.023529411765	Cell differentiation involved in embryonic placenta development	http://amigo.geneontology.org/amigo/term/GO:0060706	FZD5
0.0523067902624409	1	14	298.742857142857	Labyrinthine layer morphogenesis	http://amigo.geneontology.org/amigo/term/GO:0060713	FZD5
0.0523067902624409	1	16	261.4	Labyrinthine layer blood vessel development	http://amigo.geneontology.org/amigo/term/GO:0060716	FZD5
0.0523067902624409	1	6	697.066666666667	Chorion development	http://amigo.geneontology.org/amigo/term/GO:0060717	FZD5
0.0523067902624409	1	5	836.48	Chorionic trophoblast cell differentiation	http://amigo.geneontology.org/amigo/term/GO:0060718	FZD5
0.0523067902624409	2	240	34.8533333333333	Regulation of protein serine/threonine kinase activity	http://amigo.geneontology.org/amigo/term/GO:0071900	FZD5 CDKN1C
0.0523067902624409	1	4	1045.6	Chorionic trophoblast cell proliferation	http://amigo.geneontology.org/amigo/term/GO:0097360	FZD5
0.0523067902624409	1	4	1045.6	Regulation of chorionic trophoblast cell proliferation	http://amigo.geneontology.org/amigo/term/GO:1901382	FZD5
0.0527681727002972	1	28	149.371428571429	Embryonic camera-type eye development	http://amigo.geneontology.org/amigo/term/GO:0031076	FZD5
0.0533463916215095	1	29	144.220689655172	Embryonic axis specification	http://amigo.geneontology.org/amigo/term/GO:0000578	FZD5
0.0535835498275277	1	31	134.916129032258	Apoptotic process involved in development	http://amigo.geneontology.org/amigo/term/GO:1902742	FZD5
0.0535835498275277	1	30	139.413333333333	Developmental induction	http://amigo.geneontology.org/amigo/term/GO:0031128	FZD5
0.0535835498275277	1	34	123.011764705882	Positive regulation of interleukin-1 beta production	http://amigo.geneontology.org/amigo/term/GO:0032731	FZD5
0.0535835498275277	1	32	130.7	Regulation of JUN kinase activity	http://amigo.geneontology.org/amigo/term/GO:0043506	FZD5
0.0535835498275277	1	32	130.7	Positive regulation of striated muscle cell differentiation	http://amigo.geneontology.org/amigo/term/GO:0051155	HOPX
0.0535835498275277	2	608	13.7578947368421	Regulation of transferase activity	http://amigo.geneontology.org/amigo/term/GO:0051338	FZD5 CDKN1C
0.0535835498275277	1	33	126.739393939394	Labyrinthine layer development	http://amigo.geneontology.org/amigo/term/GO:0060711	FZD5
0.055127890317156	1	40	104.56	Anterior/posterior axis specification	http://amigo.geneontology.org/amigo/term/GO:0009948	FZD5
0.055127890317156	1	38	110.063157894737	Blastocyst formation	http://amigo.geneontology.org/amigo/term/GO:0001825	HOPX
0.055127890317156	1	39	107.241025641026	Positive regulation of interleukin-1 production	http://amigo.geneontology.org/amigo/term/GO:0032732	FZD5
0.055127890317156	1	38	110.063157894737	Lung alveolus development	http://amigo.geneontology.org/amigo/term/GO:0048286	HOPX
0.055127890317156	1	40	104.56	Positive regulation of T cell mediated immunity	http://amigo.geneontology.org/amigo/term/GO:0002711	FZD5
0.055127890317156	1	38	110.063157894737	Positive regulation of cytokine production involved in immune response	http://amigo.geneontology.org/amigo/term/GO:0002720	FZD5
0.055127890317156	1	40	104.56	Positive regulation of muscle cell differentiation	http://amigo.geneontology.org/amigo/term/GO:0051149	HOPX
0.0568578933552197	1	42	99.5809523809524	Tissue regeneration	http://amigo.geneontology.org/amigo/term/GO:0042246	HOPX
0.0593750991054654	1	62	67.458064516129	Positive regulation of tumor necrosis factor superfamily cytokine production	http://amigo.geneontology.org/amigo/term/GO:1903557	FZD5
0.0593750991054654	2	848	9.86415094339623	Embryo development	http://amigo.geneontology.org/amigo/term/GO:0009790	FZD5 HOPX
0.0593750991054654	1	56	74.6857142857143	Embryonic pattern specification	http://amigo.geneontology.org/amigo/term/GO:0009880	FZD5
0.0593750991054654	1	64	65.35	Regulation of cyclin-dependent protein serine/threonine kinase activity	http://amigo.geneontology.org/amigo/term/GO:0000079	CDKN1C
0.0593750991054654	2	801	10.4429463171036	Positive regulation of gene expression	http://amigo.geneontology.org/amigo/term/GO:0010628	FZD5 GUF1
0.0593750991054654	1	60	69.7066666666667	Embryonic placenta development	http://amigo.geneontology.org/amigo/term/GO:0001892	FZD5
0.0593750991054654	1	61	68.5639344262295	Histone deacetylation	http://amigo.geneontology.org/amigo/term/GO:0016575	HOPX
0.0593750991054654	2	800	10.456	Regulation of protein phosphorylation	http://amigo.geneontology.org/amigo/term/GO:0001932	FZD5 CDKN1C
0.0593750991054654	1	52	80.4307692307692	Interleukin-1 beta production	http://amigo.geneontology.org/amigo/term/GO:0032611	FZD5
0.0593750991054654	1	59	70.8881355932203	Interleukin-1 production	http://amigo.geneontology.org/amigo/term/GO:0032612	FZD5
0.0593750991054654	1	52	80.4307692307692	Regulation of interleukin-1 beta production	http://amigo.geneontology.org/amigo/term/GO:0032651	FZD5
0.0593750991054654	1	59	70.8881355932203	Regulation of interleukin-1 production	http://amigo.geneontology.org/amigo/term/GO:0032652	FZD5
0.0593750991054654	1	52	80.4307692307692	Positive regulation of interferon-gamma production	http://amigo.geneontology.org/amigo/term/GO:0032729	FZD5
0.0593750991054654	1	60	69.7066666666667	Positive regulation of tumor necrosis factor production	http://amigo.geneontology.org/amigo/term/GO:0032760	FZD5
0.0593750991054654	2	770	10.8633766233766	Tube development	http://amigo.geneontology.org/amigo/term/GO:0035295	FZD5 HOPX
0.0593750991054654	1	62	67.458064516129	Cytokine production involved in immune response	http://amigo.geneontology.org/amigo/term/GO:0002367	FZD5
0.0593750991054654	1	54	77.4518518518519	Apical junction assembly	http://amigo.geneontology.org/amigo/term/GO:0043297	FZD5
0.0593750991054654	1	63	66.3873015873016	Positive regulation of MAP kinase activity	http://amigo.geneontology.org/amigo/term/GO:0043406	FZD5
0.0593750991054654	1	54	77.4518518518519	Regulation of T cell mediated immunity	http://amigo.geneontology.org/amigo/term/GO:0002709	FZD5
0.0593750991054654	2	827	10.1146311970979	Anatomical structure formation involved in morphogenesis	http://amigo.geneontology.org/amigo/term/GO:0048646	FZD5 HOPX
0.0593750991054654	1	62	67.458064516129	Regulation of cytokine production involved in immune response	http://amigo.geneontology.org/amigo/term/GO:0002718	FZD5
0.0593750991054654	1	55	76.0436363636364	Regulation of striated muscle cell differentiation	http://amigo.geneontology.org/amigo/term/GO:0051153	HOPX
0.0593750991054654	1	46	90.9217391304348	Bicellular tight junction assembly	http://amigo.geneontology.org/amigo/term/GO:0070830	FZD5
0.0593750991054654	2	778	10.7516709511568	Circulatory system development	http://amigo.geneontology.org/amigo/term/GO:0072359	FZD5 HOPX
0.0593750991054654	1	46	90.9217391304348	Tight junction assembly	http://amigo.geneontology.org/amigo/term/GO:0120192	FZD5
0.0593750991054654	1	51	82.0078431372549	Tight junction organization	http://amigo.geneontology.org/amigo/term/GO:0120193	FZD5
0.0595792452538479	1	65	64.3446153846154	Axis specification	http://amigo.geneontology.org/amigo/term/GO:0009798	FZD5
0.0597784152239554	1	66	63.369696969697	T cell mediated immunity	http://amigo.geneontology.org/amigo/term/GO:0002456	FZD5
0.0601625130959353	1	68	61.5058823529412	Regulation of cyclin-dependent protein kinase activity	http://amigo.geneontology.org/amigo/term/GO:1904029	CDKN1C
0.0601625130959353	1	68	61.5058823529412	T cell differentiation in thymus	http://amigo.geneontology.org/amigo/term/GO:0033077	FZD5
0.063675187629703	1	76	55.0315789473684	Post-embryonic development	http://amigo.geneontology.org/amigo/term/GO:0009791	FZD5
0.063675187629703	1	77	54.3168831168831	Regeneration	http://amigo.geneontology.org/amigo/term/GO:0031099	HOPX
0.063675187629703	1	77	54.3168831168831	Regulation of interferon-gamma production	http://amigo.geneontology.org/amigo/term/GO:0032649	FZD5
0.063675187629703	2	915	9.14185792349727	Regulation of phosphorylation	http://amigo.geneontology.org/amigo/term/GO:0042325	FZD5 CDKN1C
0.063675187629703	1	77	54.3168831168831	Positive regulation of production of molecular mediator of immune response	http://amigo.geneontology.org/amigo/term/GO:0002702	FZD5
0.063675187629703	1	77	54.3168831168831	Positive regulation of adaptive immune response based on somatic recombination of immune receptors built from immunoglobulin superfamily domains	http://amigo.geneontology.org/amigo/term/GO:0002824	FZD5
0.0638098416251206	1	78	53.6205128205128	Interferon-gamma production	http://amigo.geneontology.org/amigo/term/GO:0032609	FZD5
0.0639415065321903	1	79	52.9417721518987	Protein deacetylation	http://amigo.geneontology.org/amigo/term/GO:0006476	HOPX
0.0640702757819043	1	80	52.28	Positive regulation of adaptive immune response	http://amigo.geneontology.org/amigo/term/GO:0002821	FZD5
0.0641962389524305	1	81	51.6345679012346	Positive regulation of lymphocyte mediated immunity	http://amigo.geneontology.org/amigo/term/GO:0002708	FZD5
0.0647868529521347	2	976	8.57049180327869	Positive regulation of cellular protein metabolic process	http://amigo.geneontology.org/amigo/term/GO:0032270	FZD5 GUF1
0.0647868529521347	1	86	48.6325581395349	Segmentation	http://amigo.geneontology.org/amigo/term/GO:0035282	FZD5
0.0647868529521347	1	86	48.6325581395349	Positive regulation of translation	http://amigo.geneontology.org/amigo/term/GO:0045727	GUF1
0.0647868529521347	1	85	49.2047058823529	Regulation of muscle cell differentiation	http://amigo.geneontology.org/amigo/term/GO:0051147	HOPX
0.0647868529521347	1	83	50.3903614457831	Negative regulation of protein serine/threonine kinase activity	http://amigo.geneontology.org/amigo/term/GO:0071901	CDKN1C
0.0671162577980459	1	90	46.4711111111111	Protein deacylation	http://amigo.geneontology.org/amigo/term/GO:0035601	HOPX
0.0672030467377036	1	91	45.9604395604396	Blastocyst development	http://amigo.geneontology.org/amigo/term/GO:0001824	HOPX
0.0675327762227778	1	95	44.0252631578947	Positive regulation of leukocyte mediated immunity	http://amigo.geneontology.org/amigo/term/GO:0002705	FZD5
0.0675327762227778	1	95	44.0252631578947	Camera-type eye morphogenesis	http://amigo.geneontology.org/amigo/term/GO:0048593	FZD5
0.0675327762227778	2	1038	8.05857418111753	Positive regulation of protein metabolic process	http://amigo.geneontology.org/amigo/term/GO:0051247	FZD5 GUF1
0.0675327762227778	1	93	44.9720430107527	Macromolecule deacylation	http://amigo.geneontology.org/amigo/term/GO:0098732	HOPX
0.0690064545677203	1	98	42.6775510204082	Cell-cell junction assembly	http://amigo.geneontology.org/amigo/term/GO:0007043	FZD5
0.0693130190439656	1	102	41.0039215686275	Placenta development	http://amigo.geneontology.org/amigo/term/GO:0001890	FZD5
0.0693130190439656	2	1079	7.75236329935125	Regulation of phosphate metabolic process	http://amigo.geneontology.org/amigo/term/GO:0019220	FZD5 CDKN1C
0.0693130190439656	1	103	40.6058252427185	Tumor necrosis factor production	http://amigo.geneontology.org/amigo/term/GO:0032640	FZD5
0.0693130190439656	1	103	40.6058252427185	Regulation of tumor necrosis factor production	http://amigo.geneontology.org/amigo/term/GO:0032680	FZD5
0.0693130190439656	2	1079	7.75236329935125	Regulation of phosphorus metabolic process	http://amigo.geneontology.org/amigo/term/GO:0051174	FZD5 CDKN1C
0.0694828828684558	1	106	39.4566037735849	Regulation of tumor necrosis factor superfamily cytokine production	http://amigo.geneontology.org/amigo/term/GO:1903555	FZD5
0.0694828828684558	1	105	39.832380952381	Positive regulation of cellular amide metabolic process	http://amigo.geneontology.org/amigo/term/GO:0034250	GUF1
0.0694828828684558	1	106	39.4566037735849	Tumor necrosis factor superfamily cytokine production	http://amigo.geneontology.org/amigo/term/GO:0071706	FZD5
0.0696945767669572	1	109	38.3706422018349	Regulation of heart contraction	http://amigo.geneontology.org/amigo/term/GO:0008016	HOPX
0.0696945767669572	1	110	38.0218181818182	Regulation of MAP kinase activity	http://amigo.geneontology.org/amigo/term/GO:0043405	FZD5
0.0696945767669572	1	109	38.3706422018349	Regulation of lymphocyte mediated immunity	http://amigo.geneontology.org/amigo/term/GO:0002706	FZD5
0.0696945767669572	1	110	38.0218181818182	Regulation of adaptive immune response based on somatic recombination of immune receptors built from immunoglobulin superfamily domains	http://amigo.geneontology.org/amigo/term/GO:0002822	FZD5
0.0697450322697971	1	111	37.6792792792793	Regulation of production of molecular mediator of immune response	http://amigo.geneontology.org/amigo/term/GO:0002700	FZD5
0.0706354723101773	2	1150	7.27373913043478	Regulation of protein modification process	http://amigo.geneontology.org/amigo/term/GO:0031399	FZD5 CDKN1C
0.0706354723101773	1	114	36.6877192982456	Positive regulation of developmental growth	http://amigo.geneontology.org/amigo/term/GO:0048639	HOPX
0.0729213616587636	1	119	35.146218487395	Eye morphogenesis	http://amigo.geneontology.org/amigo/term/GO:0048592	FZD5
0.0729435647490864	1	120	34.8533333333333	Regulation of adaptive immune response	http://amigo.geneontology.org/amigo/term/GO:0002819	FZD5
0.0759415160863325	1	127	32.9322834645669	Cell maturation	http://amigo.geneontology.org/amigo/term/GO:0048469	FZD5
0.0759415160863325	1	126	33.1936507936508	Positive regulation of protein serine/threonine kinase activity	http://amigo.geneontology.org/amigo/term/GO:0071902	FZD5
0.0765248407570027	1	129	32.4217054263566	Cellular response to molecule of bacterial origin	http://amigo.geneontology.org/amigo/term/GO:0071219	FZD5
0.0781782410363172	1	137	30.5284671532847	Regulation of blood circulation	http://amigo.geneontology.org/amigo/term/GO:1903522	HOPX
0.0781782410363172	2	1264	6.61772151898734	Protein phosphorylation	http://amigo.geneontology.org/amigo/term/GO:0006468	FZD5 CDKN1C
0.0781782410363172	1	133	31.4466165413534	Production of molecular mediator of immune response	http://amigo.geneontology.org/amigo/term/GO:0002440	FZD5
0.0781782410363172	1	135	30.9807407407407	Heart contraction	http://amigo.geneontology.org/amigo/term/GO:0060047	HOPX
0.0781782410363172	1	137	30.5284671532847	Regulation of cell junction assembly	http://amigo.geneontology.org/amigo/term/GO:1901888	FZD5
0.0801437369584705	1	145	28.8441379310345	Negative regulation of protein kinase activity	http://amigo.geneontology.org/amigo/term/GO:0006469	CDKN1C
0.0801437369584705	1	148	28.2594594594595	Respiratory tube development	http://amigo.geneontology.org/amigo/term/GO:0030323	HOPX
0.0801437369584705	1	145	28.8441379310345	Lung development	http://amigo.geneontology.org/amigo/term/GO:0030324	HOPX
0.0801437369584705	1	149	28.0697986577181	Regulation of protein binding	http://amigo.geneontology.org/amigo/term/GO:0043393	HOPX
0.0801437369584705	1	143	29.2475524475524	Cell-cell junction organization	http://amigo.geneontology.org/amigo/term/GO:0045216	FZD5
0.0801437369584705	1	148	28.2594594594595	Regulation of leukocyte mediated immunity	http://amigo.geneontology.org/amigo/term/GO:0002703	FZD5
0.0801437369584705	1	142	29.4535211267606	Heart process	http://amigo.geneontology.org/amigo/term/GO:0003015	HOPX
0.0801437369584705	1	148	28.2594594594595	Cellular response to biotic stimulus	http://amigo.geneontology.org/amigo/term/GO:0071216	FZD5
0.0811212156815003	1	153	27.3359477124183	Negative regulation of mitotic cell cycle	http://amigo.geneontology.org/amigo/term/GO:0045930	CDKN1C
0.0811212156815003	1	153	27.3359477124183	Morphogenesis of a branching epithelium	http://amigo.geneontology.org/amigo/term/GO:0061138	FZD5
0.0831547199208001	1	158	26.4708860759494	Positive regulation of immune effector process	http://amigo.geneontology.org/amigo/term/GO:0002699	FZD5
0.0839471914771806	1	164	25.5024390243902	Morphogenesis of a branching structure	http://amigo.geneontology.org/amigo/term/GO:0001763	FZD5
0.0839471914771806	2	1387	6.0308579668349	Positive regulation of macromolecule biosynthetic process	http://amigo.geneontology.org/amigo/term/GO:0010557	FZD5 GUF1
0.0839471914771806	1	161	25.9776397515528	Negative regulation of kinase activity	http://amigo.geneontology.org/amigo/term/GO:0033673	CDKN1C
0.0839471914771806	1	163	25.6588957055215	Respiratory system development	http://amigo.geneontology.org/amigo/term/GO:0060541	HOPX
0.0843263885092769	1	167	25.0443113772455	Positive regulation of growth	http://amigo.geneontology.org/amigo/term/GO:0045927	HOPX
0.0843263885092769	1	166	25.1951807228916	Striated muscle cell differentiation	http://amigo.geneontology.org/amigo/term/GO:0051146	HOPX
0.0852520235815019	1	170	24.6023529411765	Anatomical structure maturation	http://amigo.geneontology.org/amigo/term/GO:0071695	FZD5
0.0879204642997303	2	1446	5.78478561549101	Positive regulation of cellular biosynthetic process	http://amigo.geneontology.org/amigo/term/GO:0031328	FZD5 GUF1
0.0894924089808841	2	1465	5.70976109215017	Positive regulation of biosynthetic process	http://amigo.geneontology.org/amigo/term/GO:0009891	FZD5 GUF1
0.0897865029844035	1	184	22.7304347826087	Anterior/posterior pattern specification	http://amigo.geneontology.org/amigo/term/GO:0009952	FZD5
0.0897865029844035	1	183	22.8546448087432	Negative regulation of transferase activity	http://amigo.geneontology.org/amigo/term/GO:0051348	CDKN1C
0.0911191958089988	1	188	22.2468085106383	Response to molecule of bacterial origin	http://amigo.geneontology.org/amigo/term/GO:0002237	FZD5
0.0911292883997996	2	1500	5.57653333333333	Phosphorylation	http://amigo.geneontology.org/amigo/term/GO:0016310	FZD5 CDKN1C
0.094199141421956	1	197	21.2304568527919	T cell differentiation	http://amigo.geneontology.org/amigo/term/GO:0030217	FZD5
0.09640613520287	1	203	20.6029556650246	Developmental maturation	http://amigo.geneontology.org/amigo/term/GO:0021700	FZD5
0.096732748532035	1	205	20.4019512195122	Lymphocyte mediated immunity	http://amigo.geneontology.org/amigo/term/GO:0002449	FZD5
0.0996547206404884	1	214	19.5439252336449	Adaptive immune response based on somatic recombination of immune receptors built from immunoglobulin superfamily domains	http://amigo.geneontology.org/amigo/term/GO:0002460	FZD5
0.0996547206404884	1	213	19.6356807511737	Sensory organ morphogenesis	http://amigo.geneontology.org/amigo/term/GO:0090596	FZD5
0.0999536219144926	1	216	19.362962962963	Regulation of developmental growth	http://amigo.geneontology.org/amigo/term/GO:0048638	HOPX
0.102498802578189	1	223	18.7551569506726	Regulation of immune effector process	http://amigo.geneontology.org/amigo/term/GO:0002697	FZD5
0.102775412631146	1	225	18.5884444444444	Muscle cell differentiation	http://amigo.geneontology.org/amigo/term/GO:0042692	HOPX
0.106845299588084	1	237	17.6472573839662	Embryonic organ morphogenesis	http://amigo.geneontology.org/amigo/term/GO:0048562	FZD5
0.106845299588084	2	1689	4.95251628182356	Regulation of catalytic activity	http://amigo.geneontology.org/amigo/term/GO:0050790	FZD5 CDKN1C
0.107088905479587	1	239	17.4995815899582	Negative regulation of protein phosphorylation	http://amigo.geneontology.org/amigo/term/GO:0001933	CDKN1C
0.10729179091625	2	1711	4.88883693746347	Negative regulation of nitrogen compound metabolic process	http://amigo.geneontology.org/amigo/term/GO:0051172	HOPX CDKN1C
0.10729179091625	1	241	17.354356846473	Canonical Wnt signaling pathway	http://amigo.geneontology.org/amigo/term/GO:0060070	FZD5
0.108230381071471	1	246	17.0016260162602	Camera-type eye development	http://amigo.geneontology.org/amigo/term/GO:0043010	FZD5
0.111871902999988	1	256	16.3375	Negative regulation of cell cycle	http://amigo.geneontology.org/amigo/term/GO:0045786	CDKN1C
0.112500142010452	1	259	16.1482625482625	Leukocyte mediated immunity	http://amigo.geneontology.org/amigo/term/GO:0002443	FZD5
0.113120466915758	1	262	15.963358778626	Regulation of translation	http://amigo.geneontology.org/amigo/term/GO:0006417	GUF1
0.113695564404122	1	268	15.6059701492537	Adaptive immune response	http://amigo.geneontology.org/amigo/term/GO:0002250	FZD5
0.113695564404122	1	265	15.782641509434	Positive regulation of protein kinase activity	http://amigo.geneontology.org/amigo/term/GO:0045860	FZD5
0.113695564404122	1	268	15.6059701492537	Regulation of binding	http://amigo.geneontology.org/amigo/term/GO:0051098	HOPX
0.114627965344133	1	281	14.8839857651246	Eye development	http://amigo.geneontology.org/amigo/term/GO:0001654	FZD5
0.114627965344133	2	1834	4.56095965103599	Response to external stimulus	http://amigo.geneontology.org/amigo/term/GO:0009605	FZD5 HOPX
0.114627965344133	1	282	14.8312056737589	Lymphocyte differentiation	http://amigo.geneontology.org/amigo/term/GO:0030098	FZD5
0.114627965344133	2	1858	4.50204520990312	Negative regulation of cellular metabolic process	http://amigo.geneontology.org/amigo/term/GO:0031324	HOPX CDKN1C
0.114627965344133	1	280	14.9371428571429	Cell junction assembly	http://amigo.geneontology.org/amigo/term/GO:0034329	FZD5
0.114627965344133	1	272	15.3764705882353	Negative regulation of phosphorylation	http://amigo.geneontology.org/amigo/term/GO:0042326	CDKN1C
0.114627965344133	2	1849	4.52395889670092	Regulation of multicellular organismal process	http://amigo.geneontology.org/amigo/term/GO:0051239	FZD5 HOPX
0.114627965344133	1	282	14.8312056737589	Visual system development	http://amigo.geneontology.org/amigo/term/GO:0150063	FZD5
0.114680419018029	2	1868	4.4779443254818	Regulation of transcription by RNA polymerase II	http://amigo.geneontology.org/amigo/term/GO:0006357	FZD5 HOPX
0.114680419018029	1	286	14.6237762237762	Sensory system development	http://amigo.geneontology.org/amigo/term/GO:0048880	FZD5
0.114849391864841	1	288	14.5222222222222	Blood circulation	http://amigo.geneontology.org/amigo/term/GO:0008015	HOPX
0.115016286752265	1	290	14.4220689655172	Regionalization	http://amigo.geneontology.org/amigo/term/GO:0003002	FZD5
0.116263025024674	1	297	14.0821548821549	Positive regulation of MAPK cascade	http://amigo.geneontology.org/amigo/term/GO:0043410	FZD5
0.116263025024674	1	296	14.1297297297297	Reproductive structure development	http://amigo.geneontology.org/amigo/term/GO:0048608	FZD5
0.116263025024674	1	298	14.0348993288591	Reproductive system development	http://amigo.geneontology.org/amigo/term/GO:0061458	FZD5
0.118087812390147	1	318	13.1522012578616	Mononuclear cell differentiation	http://amigo.geneontology.org/amigo/term/GO:1903131	FZD5
0.118087812390147	2	1942	4.30731204943357	Transcription by RNA polymerase II	http://amigo.geneontology.org/amigo/term/GO:0006366	FZD5 HOPX
0.118087812390147	1	312	13.4051282051282	Regulation of mitotic cell cycle	http://amigo.geneontology.org/amigo/term/GO:0007346	CDKN1C
0.118087812390147	2	1971	4.2439370877727	Anatomical structure morphogenesis	http://amigo.geneontology.org/amigo/term/GO:0009653	FZD5 HOPX
0.118087812390147	1	314	13.3197452229299	Wnt signaling pathway	http://amigo.geneontology.org/amigo/term/GO:0016055	FZD5
0.118087812390147	1	319	13.1109717868339	Positive regulation of kinase activity	http://amigo.geneontology.org/amigo/term/GO:0033674	FZD5
0.118087812390147	1	308	13.5792207792208	Regulation of cellular amide metabolic process	http://amigo.geneontology.org/amigo/term/GO:0034248	GUF1
0.118087812390147	1	316	13.2354430379747	Regulation of system process	http://amigo.geneontology.org/amigo/term/GO:0044057	HOPX
0.118087812390147	1	307	13.6234527687296	Circulatory system process	http://amigo.geneontology.org/amigo/term/GO:0003013	HOPX
0.118087812390147	1	317	13.193690851735	Cell-cell signaling by wnt	http://amigo.geneontology.org/amigo/term/GO:0198738	FZD5
0.118223068711218	1	321	13.0292834890966	Positive regulation of cytokine production	http://amigo.geneontology.org/amigo/term/GO:0001819	FZD5
0.123321516253899	1	337	12.4106824925816	Embryonic organ development	http://amigo.geneontology.org/amigo/term/GO:0048568	FZD5
0.126243705265265	1	347	12.0530259365994	T cell activation	http://amigo.geneontology.org/amigo/term/GO:0042110	FZD5
0.127732860221224	1	353	11.8481586402266	Angiogenesis	http://amigo.geneontology.org/amigo/term/GO:0001525	FZD5
0.131932338254582	1	367	11.3961852861035	Pattern specification process	http://amigo.geneontology.org/amigo/term/GO:0007389	FZD5
0.131932338254582	1	376	11.1234042553191	Negative regulation of phosphorus metabolic process	http://amigo.geneontology.org/amigo/term/GO:0010563	CDKN1C
0.131932338254582	1	370	11.3037837837838	Posttranscriptional regulation of gene expression	http://amigo.geneontology.org/amigo/term/GO:0010608	GUF1
0.131932338254582	1	376	11.1234042553191	Histone modification	http://amigo.geneontology.org/amigo/term/GO:0016570	HOPX
0.131932338254582	1	376	11.1234042553191	Negative regulation of phosphate metabolic process	http://amigo.geneontology.org/amigo/term/GO:0045936	CDKN1C
0.131932338254582	1	375	11.1530666666667	Positive regulation of transferase activity	http://amigo.geneontology.org/amigo/term/GO:0051347	FZD5
0.133334768967089	1	382	10.9486910994764	Positive regulation of immune response	http://amigo.geneontology.org/amigo/term/GO:0050778	FZD5
0.133383934212473	1	384	10.8916666666667	Cell surface receptor signaling pathway involved in cell-cell signaling	http://amigo.geneontology.org/amigo/term/GO:1905114	FZD5
0.134098093690818	1	388	10.779381443299	Morphogenesis of an epithelium	http://amigo.geneontology.org/amigo/term/GO:0002009	FZD5
0.135503672529552	1	396	10.5616161616162	Heart development	http://amigo.geneontology.org/amigo/term/GO:0007507	HOPX
0.135503672529552	1	396	10.5616161616162	Negative regulation of protein modification process	http://amigo.geneontology.org/amigo/term/GO:0031400	CDKN1C
0.135540245294694	1	398	10.5085427135678	Regulation of growth	http://amigo.geneontology.org/amigo/term/GO:0040008	HOPX
0.136228054853567	1	402	10.4039800995025	Muscle structure development	http://amigo.geneontology.org/amigo/term/GO:0061061	HOPX
0.137880705620609	1	409	10.2259168704156	Leukocyte differentiation	http://amigo.geneontology.org/amigo/term/GO:0002521	FZD5
0.139193321382479	1	415	10.0780722891566	Immune effector process	http://amigo.geneontology.org/amigo/term/GO:0002252	FZD5
0.142092505492918	1	426	9.81784037558685	Regulation of MAPK cascade	http://amigo.geneontology.org/amigo/term/GO:0043408	FZD5
0.142731056904737	1	432	9.68148148148148	Negative regulation of cell differentiation	http://amigo.geneontology.org/amigo/term/GO:0045596	HOPX
0.142731056904737	1	431	9.70394431554524	Blood vessel morphogenesis	http://amigo.geneontology.org/amigo/term/GO:0048514	FZD5
0.143675461027354	1	437	9.57070938215103	Sensory organ development	http://amigo.geneontology.org/amigo/term/GO:0007423	FZD5
0.148678306175033	1	455	9.19208791208791	Developmental growth	http://amigo.geneontology.org/amigo/term/GO:0048589	HOPX
0.151622517822138	1	469	8.91769722814499	Negative regulation of cell population proliferation	http://amigo.geneontology.org/amigo/term/GO:0008285	FZD5
0.151622517822138	1	468	8.93675213675214	Response to bacterium	http://amigo.geneontology.org/amigo/term/GO:0009617	FZD5
0.151622517822138	1	472	8.86101694915254	Cell junction organization	http://amigo.geneontology.org/amigo/term/GO:0034330	FZD5
0.151622517822138	1	473	8.84228329809725	Tissue morphogenesis	http://amigo.geneontology.org/amigo/term/GO:0048729	FZD5
0.154013363554809	1	483	8.6592132505176	Embryonic morphogenesis	http://amigo.geneontology.org/amigo/term/GO:0048598	FZD5
0.15577315190701	1	491	8.51812627291242	MAPK cascade	http://amigo.geneontology.org/amigo/term/GO:0000165	FZD5
0.156912810836795	1	497	8.41529175050302	Blood vessel development	http://amigo.geneontology.org/amigo/term/GO:0001568	FZD5
0.157143141407937	1	500	1948-08-01	Regulation of cytokine production	http://amigo.geneontology.org/amigo/term/GO:0001817	FZD5
0.158561795564293	1	507	8.24930966469428	Cytokine production	http://amigo.geneontology.org/amigo/term/GO:0001816	FZD5
0.158781480929554	1	510	8.20078431372549	Positive regulation of protein phosphorylation	http://amigo.geneontology.org/amigo/term/GO:0001934	FZD5
0.161943270472499	1	523	7.99694072657744	Vasculature development	http://amigo.geneontology.org/amigo/term/GO:0001944	FZD5
0.162436934133869	1	527	7.93624288425047	Lymphocyte activation	http://amigo.geneontology.org/amigo/term/GO:0046649	FZD5
0.164381101482956	1	536	7.80298507462687	Negative regulation of catalytic activity	http://amigo.geneontology.org/amigo/term/GO:0043086	CDKN1C
0.172375212287259	1	570	7.33754385964912	Translation	http://amigo.geneontology.org/amigo/term/GO:0006412	GUF1
0.172375212287259	1	571	7.32469352014011	Positive regulation of phosphorylation	http://amigo.geneontology.org/amigo/term/GO:0042327	FZD5
0.172375212287259	1	570	7.33754385964912	Positive regulation of cell differentiation	http://amigo.geneontology.org/amigo/term/GO:0045597	HOPX
0.175925956822754	1	586	7.13720136518771	Peptide biosynthetic process	http://amigo.geneontology.org/amigo/term/GO:0043043	GUF1
0.178977281777476	1	628	6.65987261146497	Positive regulation of intracellular signal transduction	http://amigo.geneontology.org/amigo/term/GO:1902533	FZD5
0.178977281777476	1	618	6.76763754045307	Positive regulation of phosphorus metabolic process	http://amigo.geneontology.org/amigo/term/GO:0010562	FZD5
0.178977281777476	1	620	6.7458064516129	Regulation of response to external stimulus	http://amigo.geneontology.org/amigo/term/GO:0032101	HOPX
0.178977281777476	1	623	6.71332263242376	Tube morphogenesis	http://amigo.geneontology.org/amigo/term/GO:0035239	FZD5
0.178977281777476	1	625	6.69184	Mitotic cell cycle	http://amigo.geneontology.org/amigo/term/GO:0000278	CDKN1C
0.178977281777476	1	619	6.75670436187399	Growth	http://amigo.geneontology.org/amigo/term/GO:0040007	HOPX
0.178977281777476	1	623	6.71332263242376	Leukocyte activation	http://amigo.geneontology.org/amigo/term/GO:0045321	FZD5
0.178977281777476	1	618	6.76763754045307	Positive regulation of phosphate metabolic process	http://amigo.geneontology.org/amigo/term/GO:0045937	FZD5
0.178977281777476	1	626	6.68115015974441	Positive regulation of immune system process	http://amigo.geneontology.org/amigo/term/GO:0002684	FZD5
0.178977281777476	1	621	6.73494363929147	Regulation of immune response	http://amigo.geneontology.org/amigo/term/GO:0050776	FZD5
0.178977281777476	1	617	6.77860615883306	Negative regulation of developmental process	http://amigo.geneontology.org/amigo/term/GO:0051093	HOPX
0.178977281777476	1	603	6.93598673300166	Developmental process involved in reproduction	http://amigo.geneontology.org/amigo/term/GO:0003006	FZD5
0.181479194089908	1	640	6.535	Hemopoiesis	http://amigo.geneontology.org/amigo/term/GO:0030097	FZD5
0.185540549638835	1	658	6.35623100303951	Negative regulation of transcription by RNA polymerase II	http://amigo.geneontology.org/amigo/term/GO:0000122	HOPX
0.189347093806807	1	678	6.16873156342183	Amide biosynthetic process	http://amigo.geneontology.org/amigo/term/GO:0043604	GUF1
0.189347093806807	1	676	6.18698224852071	Hematopoietic or lymphoid organ development	http://amigo.geneontology.org/amigo/term/GO:0048534	FZD5
0.191909797630992	1	702	5.95783475783476	Peptide metabolic process	http://amigo.geneontology.org/amigo/term/GO:0006518	GUF1
0.191909797630992	1	699	5.98340486409156	Cell activation	http://amigo.geneontology.org/amigo/term/GO:0001775	FZD5
0.191909797630992	1	699	5.98340486409156	Positive regulation of protein modification process	http://amigo.geneontology.org/amigo/term/GO:0031401	FZD5
0.191909797630992	1	702	5.95783475783476	Regulation of cellular component biogenesis	http://amigo.geneontology.org/amigo/term/GO:0044087	FZD5
0.191909797630992	1	692	6.04393063583815	Regulation of cell cycle	http://amigo.geneontology.org/amigo/term/GO:0051726	CDKN1C
0.196512763336207	1	723	5.78478561549101	Immune system development	http://amigo.geneontology.org/amigo/term/GO:0002520	FZD5
0.196784639962976	1	727	5.75295735900963	Negative regulation of cellular protein metabolic process	http://amigo.geneontology.org/amigo/term/GO:0032269	CDKN1C
